# Supplementary material for: Direct metal-free homo-/cross-coupling of carbonyls with alcohols or imines under ambient light
Source: Royal Society of Chemistry journal article supplement (doi:10.1039/d5gc01922b), 2025-01-01
Supplement: d5gc01922b1.pdf [file d5gc01922b1.pdf]

## *Supporting information*

### **Direct Metal-Free Homo-/Cross-Coupling of Carbonyls with Alcohols or Imines under Ambient Light**

Tongyu Han,<sup>†</sup>+ Shiqian Zhang,<sup>†</sup>+ Jinya Li,<sup>†</sup>+ Quansheng Mou,<sup>†</sup> Jian Gao,<sup>†</sup> Bowen Cao,<sup>†</sup> Chao-Jun Li<sup>\*‡</sup>  
and Mingxin Liu<sup>\*†</sup>

<sup>†</sup>State Key Laboratory of Applied Organic Chemistry, College of Chemistry and Chemical Engineering,  
Lanzhou University, Lanzhou 730000, China

<sup>‡</sup>Department of Chemistry, FQRNT Centre for Green Chemistry and Catalysis, McGill University,  
Montreal, Quebec H3A 0B8, Canada

+These authors contributed equally

#### **Table of Contents**

|                                                                                     |     |
|-------------------------------------------------------------------------------------|-----|
| 1.General information.....                                                          | S2  |
| 2.Optimization of the reaction conditions.....                                      | S3  |
| 3.General procedure <b>A</b> for the synthesis of 1,2-diols <b>2a–2o</b> .....      | S5  |
| 4.General Procedure <b>B</b> for the synthesis of 1,2-diols <b>2p–2ab</b> .....     | S10 |
| 5.General procedure for the synthesis of 1,2-diols <b>4</b> and <b>5</b> .....      | S15 |
| 6.General Procedure for the synthesis of $\beta$ -amino alcohols <b>7a–7s</b> ..... | S26 |
| 7.Radical trapping experiments.....                                                 | S33 |
| 8.Cyclic voltammetry analysis.....                                                  | S36 |
| 9.UV-vis studies.....                                                               | S36 |
| 10.Gram-scale synthesis.....                                                        | S37 |
| 11.Computational details.....                                                       | S37 |
| 12.Comparison with previous work.....                                               | S40 |
| 13.References.....                                                                  | S40 |
| 14.Copies of NMR Spectra for the products.....                                      | S42 |



## 1. General Information

All reactions were carried out under an argon atmosphere in a flame-dried quartz tube with magnetic stirring. Petroleum ether, ethyl acetate and other solvents were dried and purified according to the procedure from “Purification of Laboratory Chemicals”.<sup>1</sup> The reactions were monitored by TLC analysis using silica gel GF-254 thin layer plates and compounds were visualized with a UV light at 254 nm. All products were purified by flash chromatography on silica gel. The chemical yields referred are isolated products. <sup>1</sup>H and <sup>13</sup>C spectra were collected on a Bruker AVANCE III 400MHz and JEOL JNM-ECS 400MHz at room temperature. Chemical shifts ( $\delta$ ) are expressed in ppm downfield from TMS as internal standard. The letters s, d, t, q, and m are used to indicate singlet, doublet, triplet, quadruplet, and multiple, respectively. <sup>19</sup>F NMR spectra were collected on Bruker AVANCE III 400 MHz spectrometers at room temperature. HRMS was performed on Bruker Apex II FT-ICR mass instrument (ESI) and Waters GCT Premier TOFMS (EI).

The equipment of light-reaction is a multi-channel photoreactor with 10 W purple light (395–400 nm, composed of 2 LED units in series, manufacturer: Shanghai Yukang Science and Education Instrument and Equipment company, wavelength of peak intensity: 397.7 nm). 10 W UVA LED (365–370 nm, composed of 2 LED units in series, manufacturer: Shanghai Yukang Science and Education Instrument and Equipment company, wavelength of peak intensity: 367.2 nm).



## 2. Optimization of reaction conditions.

**Table S1. The optimization of reaction conditions for aldehyde homo-coupling.<sup>a</sup>**

| Entry           | Solvent        | Light      | Yield (%) <sup>b</sup> |
|-----------------|----------------|------------|------------------------|
| 1               | MeOH           | 365–370 nm | 61                     |
| 2               | EtOH           | 365–370 nm | 63                     |
| 3               | <i>i</i> -PrOH | 365–370 nm | 98                     |
| 4               | MeCN           | 365–370 nm | trace                  |
| 5               | toluene        | 365–370 nm | 21                     |
| 6               | DCM            | 365–370 nm | trace                  |
| 7               | DCE            | 365–370 nm | trace                  |
| 8               | DME            | 365–370 nm | trace                  |
| 9               | <i>i</i> -PrOH | 395–400 nm | 98                     |
| 10              | <i>i</i> -PrOH | 425–430 nm | N.R.                   |
| 11 <sup>c</sup> | <i>i</i> -PrOH | 395–400 nm | 87                     |
| 12              | <i>i</i> -PrOH | dark       | N.R.                   |

<sup>a</sup>Reaction condition: Benzaldehyde (0.2 mmol), solvent (2 mL), under argon atmosphere and room temperature for 8 h. <sup>b</sup>Isolated yield. <sup>c</sup>Under air atmosphere. Dark = no light. N.R. = no reaction.

**Table S2. Optimization of reaction conditions for aldehydes and alcohols.<sup>a</sup>**

| Entry | Solvent           | Light      | Yield (%) <sup>b</sup> |
|-------|-------------------|------------|------------------------|
| 1     | EtOAc             | 365–370 nm | 53                     |
| 2     | CHCl <sub>3</sub> | 365–370 nm | trace                  |
| 3     | DCE               | 365–370 nm | trace                  |
| 4     | DCM               | 365–370 nm | trace                  |
| 5     | benzotrifluoride  | 365–370 nm | trace                  |
| 6     | DMF               | 365–370 nm | 31                     |
| 7     | MeCN              | 365–370 nm | 89                     |
| 8     | MeCN              | 395–400 nm | 80                     |
| 9     | MeCN              | 425–430 nm | N.D.                   |
| 10    | MeCN              | dark       | N.D.                   |



|                 |      |            |    |
|-----------------|------|------------|----|
| 11 <sup>c</sup> | MeCN | 365-370 nm | 69 |
|-----------------|------|------------|----|

<sup>a</sup>Reaction conditions: **1a** (0.2 mmol), **2a** (0.3 mmol), solvent (2 mL), 10 W LED, argon atmosphere, room temperature, 36 h. <sup>b</sup>Isolated yield. <sup>c</sup>Under air atmosphere. Dark= without light. N.D.= No detected.

**Table S3. Optimization of reaction conditions for aldehydes and imines.<sup>a</sup>**

| Entry               | Solvent               | Light      | Reductant                           | Yield (%)       |
|---------------------|-----------------------|------------|-------------------------------------|-----------------|
| 1                   | MeCN                  | 365-370 nm | <i>i</i> -Pr <sub>2</sub> NEt       | 40 <sup>b</sup> |
| 2                   | MeCN                  | 395-400 nm | <i>i</i> -Pr <sub>2</sub> NEt       | N.D.            |
| 3                   | MeOH                  | 365-370 nm | <i>i</i> -Pr <sub>2</sub> NEt       | 26 <sup>c</sup> |
| 4                   | DME                   | 365-370 nm | <i>i</i> -Pr <sub>2</sub> NEt       | 39 <sup>c</sup> |
| 5                   | 1,4-dioxane           | 365-370 nm | <i>i</i> -Pr <sub>2</sub> NEt       | 35 <sup>c</sup> |
| 6 <sup>d</sup>      | MeCN/H <sub>2</sub> O | 365-370 nm | <i>i</i> -Pr <sub>2</sub> NEt       | 59 <sup>b</sup> |
| 7 <sup>d</sup>      | MeCN/H <sub>2</sub> O | 365-370 nm | Et <sub>3</sub> N                   | 36 <sup>b</sup> |
| 8 <sup>d</sup>      | MeCN/H <sub>2</sub> O | 365-370 nm | HCOOK                               | trace           |
| 9 <sup>d</sup>      | MeCN/H <sub>2</sub> O | 365-370 nm | NaHSO <sub>3</sub>                  | trace           |
| 10 <sup>d</sup>     | MeCN/H <sub>2</sub> O | 365-370 nm | <i>N,N</i> -Dicyclohexylmethylamine | 49 <sup>b</sup> |
| 11 <sup>e</sup>     | MeCN/H <sub>2</sub> O | 365-370 nm | <i>i</i> -Pr <sub>2</sub> NEt       | 60 <sup>b</sup> |
| 12 <sup>e,f</sup>   | MeCN/H <sub>2</sub> O | 365-370 nm | <i>i</i> -Pr <sub>2</sub> NEt       | 72 <sup>b</sup> |
| 13 <sup>e,f,g</sup> | MeCN/H <sub>2</sub> O | 365-370 nm | <i>i</i> -Pr <sub>2</sub> NEt       | N.D.            |
| 14 <sup>e,f</sup>   | MeCN/H <sub>2</sub> O | dark       | <i>i</i> -Pr <sub>2</sub> NEt       | N.D.            |

<sup>a</sup>Reaction conditions: **1a** (0.3 mmol), **6a** (0.2 mmol), solvent (2 mL), 10 W LEDs, argon atmosphere, room temperature, 24 h. <sup>b</sup>Isolated yield. <sup>c</sup>The yields were carried by <sup>1</sup>H NMR, Mesitylene (5 μL) as an internal standard.

<sup>d</sup>Solvent MeCN = 2 mL, H<sub>2</sub>O = 0.1 mL. <sup>e</sup>**1a** (0.4 mmol). <sup>f</sup>Solvent MeCN = 0.5 mL, H<sub>2</sub>O = 0.05 mL. <sup>g</sup>Under air atmosphere. Dark= without light. N.D.= No detected.

**Table S4. Other substrates**

When heteroaromatic aldehydes or ketones are used as substrates, the corresponding products are detectable only in trace amounts.

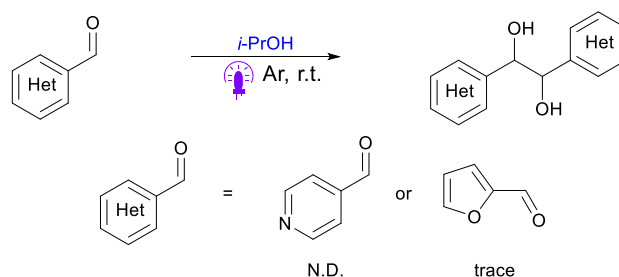

Reaction condition: aldehydes (0.2 mmol), <sup>i</sup>PrOH (2 mL), under argon atmosphere and room temperature for 8 h. N.D. = no detected.



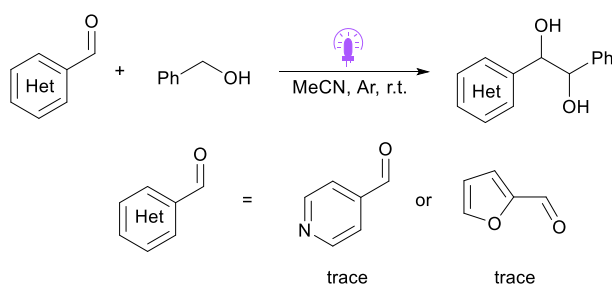

Reaction conditions: aldehydes (0.2 mmol), Benzyl alcohol (0.3 mmol), MeCN (2 mL), 10 W LED (365-370 nm), argon atmosphere, room temperature, 36 h. N.D.= No detected.

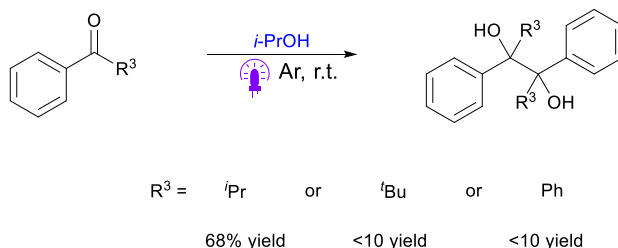

Reaction condition: ketones (0.2 mmol), *i*-PrOH (2 mL), under argon atmosphere and room temperature for 8 h.

### 3. General Procedure A for the synthesis of 1,2-diols 2a–2o.

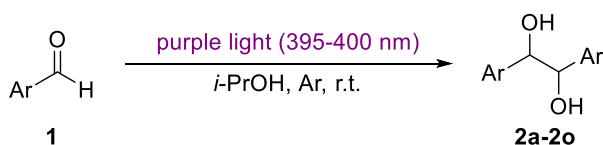

In an argon-filled glovebox, a 10 mL flame-dried quartz tube with magnetic stirring was charged sequentially with *i*-PrOH (2 mL) and substrates **1** (0.2 mmol) were sequentially added into the quartz tube. Then, the quartz tube was removed from glovebox. The mixture was stirred at room temperature under 10 W purple light (395–400 nm) until the reaction was completed, as monitored by TLC analysis. The reaction mixture was then concentrated in vacuum. The crude product was purified by flash column chromatography (silica gel, PE/EA) to afford the desired products. The corresponding HRMS data of the known product are available in the literature: (**2a**, **2b**, **2e**, **2f**, **2g**, **2h**, **2j**, **2k**, **2m**)<sup>2</sup>; (**2c**, **2i**)<sup>19</sup>; (**2d**)<sup>20</sup>, (**2l**)<sup>3</sup>.

#### 1,2-Biphenylethane-1,2-diol (**2a**)

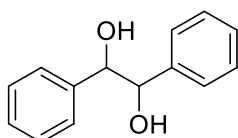

The title compound was synthesized according to the general procedure A. The product was purified by flash column chromatography. 98% (21 mg) isolated yield, white solid, *dl* : *meso* = 1.02 : 1. <sup>1</sup>H NMR



(400 MHz, CDCl<sub>3</sub>)  $\delta$  7.31 – 7.22 (m, 8H), 7.12 – 7.10 (m, 2H), 4.81 (s, 1H), 4.68 (s, 1H), 2.95 (s, 1H), 2.29 (s, 1H). <sup>13</sup>C NMR (100 MHz, CDCl<sub>3</sub>)  $\delta$  139.78, 139.69, 128.20, 128.09, 127.96, 127.89, 127.05, 126.91, 79.06, 78.04.

### 1,2-Di-*p*-tolylethane-1,2-diol (2b)

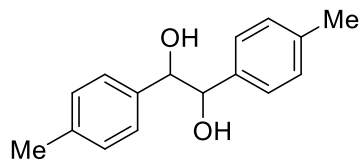

The title compound was synthesized according to the general procedure A. The product was purified by flash column chromatography. 96% (23 mg) isolated yield, white solid, *dl* : *meso* = 1 : 1. <sup>1</sup>H NMR (400 MHz, CDCl<sub>3</sub>)  $\delta$  7.14 (d, *J* = 7.6 Hz, 4H), 7.02 (d, *J* = 4.4 Hz, 4H), 4.71 (s, 1H), 4.62 (s, 1H), 2.92 (s, 1H), 2.34 (s, 3H), 2.29 (s, 3H), 2.19 (s, 1H). <sup>13</sup>C NMR (100 MHz, CDCl<sub>3</sub>)  $\delta$  137.77, 137.42, 136.91, 128.95, 128.76, 126.99, 126.81, 78.73, 77.97, 21.16, 21.13.

### 1,2-Bis(4-ethylphenyl)ethane-1,2-diol (2c)

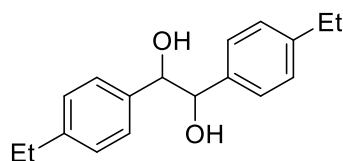

The title compound was synthesized according to the general procedure A. The product was purified by flash column chromatography. 96% (26 mg) isolated yield, white solid, *dl* : *meso* = 1.4 : 1. <sup>1</sup>H NMR (400 MHz, CDCl<sub>3</sub>)  $\delta$  7.29 – 7.15 (m, 4H), 7.08 – 7.04 (m, 4H), 4.71 (s, 1H), 4.66 (s, 1H), 2.92 (s, 1H), 2.67 – 2.57 (m, 4H), 2.22 (s, 1H), 1.25 – 1.17 (m, 6H). <sup>13</sup>C NMR (100 MHz, CDCl<sub>3</sub>)  $\delta$  144.21, 143.81, 137.27, 137.24, 127.82, 127.59, 127.10, 126.84, 78.61, 78.06, 28.55, 28.49, 15.54, 15.51.

### 1,2-Bis(4-isopropylphenyl)ethane-1,2-diol (2d)

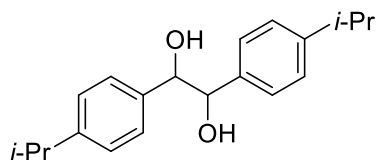

The title compound was synthesized according to the general procedure A. The product was purified by flash column chromatography. 97% (29 mg) isolated yield, white solid, *dl* : *meso* = 1 : 1.15. <sup>1</sup>H NMR (400 MHz, CDCl<sub>3</sub>)  $\delta$  7.26 (d, *J* = 8.0 Hz, 2H), 7.20 (d, *J* = 8.0 Hz, 2H), 7.12 – 7.07 (m, 4H), 4.68 (d, *J* = 4.0 Hz, 2H), 2.94 – 2.81 (m, 3H), 2.10 (s, 1H), 1.25 – 1.20 (m, 12H). <sup>13</sup>C NMR (100 MHz, CDCl<sub>3</sub>)  $\delta$  148.87, 148.41, 137.55, 137.51, 127.12, 126.74, 126.44, 126.15, 78.39, 78.07, 33.82, 33.72, 23.95, 23.92.

### 1,2-Bis(4-(*tert*-butyl)phenyl)ethane-1,2-diol (2e)



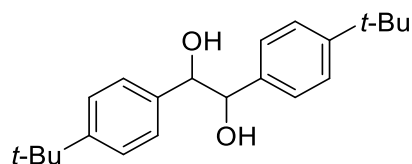

The title compound was synthesized according to the general procedure A. The product was purified by flash column chromatography. 98% (32 mg) isolated yield, white solid, *dl* : *meso* = 1.07 : 1. **<sup>1</sup>H NMR** (400 MHz, CDCl<sub>3</sub>)  $\delta$  7.37 (d, *J* = 8.4 Hz, 2H), 7.28 (dd, *J* = 8.0, 6.0 Hz, 4H), 7.11 (d, *J* = 8.4 Hz, 2H), 4.69 (d, *J* = 6.0 Hz, 2H), 2.91 (s, 1H), 2.26 (s, 1H), 1.32 (s, 9H), 1.28 (s, 9H). **<sup>13</sup>C NMR** (100 MHz, CDCl<sub>3</sub>)  $\delta$  151.13, 150.64, 137.24, 137.22, 126.86, 126.41, 125.32, 125.01, 78.13, 78.00, 34.53, 34.45, 31.30, 31.29.

### 1,2-Bis(4-methoxyphenyl)ethane-1,2-diol (2f)

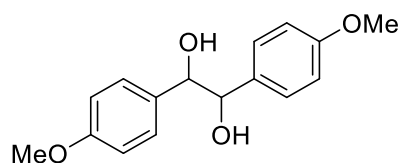

The title compound was synthesized according to the general procedure A. The product was purified by flash column chromatography. 80% (22 mg) isolated yield, white solid, *dl* : *meso* = 2 : 1. **<sup>1</sup>H NMR** (400 MHz, CDCl<sub>3</sub>)  $\delta$  7.17 (d, *J* = 8.4 Hz, 4H, *meso*), 7.01 (d, *J* = 8.4 Hz, 4H, *dl*), 6.84 (d, *J* = 8.4 Hz, 4H, *meso*), 6.74 (d, *J* = 8.4 Hz, 4H, *dl*), 4.71 (s, 2H, *meso*), 4.59 (s, 2H, *dl*), 3.79 (s, 6H, *meso*), 3.75 (s, 6H, *dl*), 3.02 (s, 2H, *dl*), 2.29 (s, 2H, *meso*). **<sup>13</sup>C NMR** (100 MHz, CDCl<sub>3</sub>)  $\delta$  159.33, 159.07, 132.04, 131.95, 128.30, 128.14, 113.61, 113.42, 78.72, 77.70, 55.22, 55.14.

### 1,2-Bis(4-fluorophenyl)ethane-1,2-diol (2g)

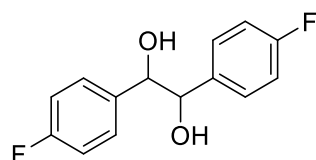

The title compound was synthesized according to the general procedure A. The product was purified by flash column chromatography. 82% (20 mg) isolated yield, white solid, *dl* : *meso* = 1.19 : 1. **<sup>1</sup>H NMR** (400 MHz, CDCl<sub>3</sub>)  $\delta$  7.15 – 7.12 (m, 2H), 7.05 – 6.89 (m, 6H), 4.81 (s, 1H), 4.60 (s, 1H), 3.05 (s, 1H), 2.43 (s, 1H). **<sup>13</sup>C NMR** (100 MHz, CDCl<sub>3</sub>)  $\delta$  163.63 (d, *J*<sub>C-F</sub> = 8.1 Hz), 161.18 (d, *J*<sub>C-F</sub> = 8.1 Hz), 135.25 (d, *J*<sub>C-F</sub> = 2.9 Hz), 135.10 (d, *J*<sub>C-F</sub> = 3.2 Hz), 128.66 (d, *J*<sub>C-F</sub> = 6.0 Hz), 128.58 (d, *J*<sub>C-F</sub> = 6.0 Hz), 78.69, 77.21. **<sup>19</sup>F NMR** (376 MHz, CDCl<sub>3</sub>)  $\delta$  -113.95, -114.03.

### 1,2-Bis(4-chlorophenyl)ethane-1,2-diol (2h)



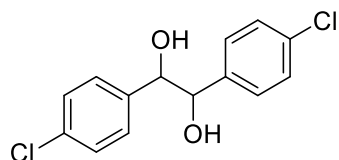

The title compound was synthesized according to the general procedure A. The product was purified by flash column chromatography. 82% (23 mg) isolated yield, white solid, *dl* : *meso* = 1.11 : 1. <sup>1</sup>H NMR (400 MHz, CDCl<sub>3</sub>)  $\delta$  7.22 (dd, *J* = 18.0, 8.4 Hz, 4H), 7.07 (d, *J* = 8.4 Hz, 2H), 6.99 (d, *J* = 8.4 Hz, 2H), 4.80 (s, 1H), 4.58 (s, 1H), 3.08 (s, 1H), 2.52 (s, 1H). <sup>13</sup>C NMR (100 MHz, CDCl<sub>3</sub>)  $\delta$  137.88, 133.82, 128.35, 128.33, 128.29, 128.28, 78.47, 77.09.

### 1,2-Bis(4-bromophenyl)ethane-1,2-diol (2i)

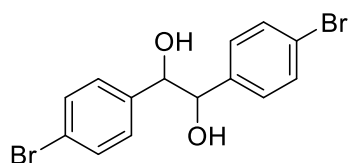

The title compound was synthesized according to the general procedure A. The product was purified by flash column chromatography. 75% (28 mg) isolated yield, white solid, *dl* : *meso* = 1 : 1.28. <sup>1</sup>H NMR (400 MHz, CDCl<sub>3</sub>)  $\delta$  7.38 (dd, *J* = 18.4, 8.4 Hz, 4H), 7.03 (d, *J* = 8.0 Hz, 2H), 6.94 (d, *J* = 8.0 Hz, 2H), 4.79 (s, 1H), 4.57 (s, 1H), 2.99 (s, 1H), 2.42 (s, 1H). <sup>13</sup>C NMR (100 MHz, CDCl<sub>3</sub>)  $\delta$  138.34, 138.20, 131.31, 131.24, 128.66, 128.63, 122.03, 78.46, 77.10.

### 1,2-Bis(4-(trifluoromethyl)phenyl)ethane-1,2-diol (2j)

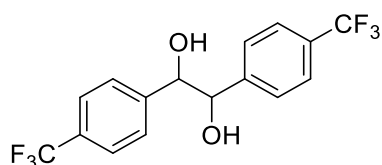

The title compound was synthesized according to the general procedure A. The product was purified by flash column chromatography. 94% (33 mg) isolated yield, white solid, *dl* : *meso* = 1 : 1.10. <sup>1</sup>H NMR (400 MHz, CDCl<sub>3</sub>)  $\delta$  7.54 – 7.49 (m, 4H), 7.26 (d, *J* = 8.0 Hz, 2H), 7.20 (d, *J* = 8.0 Hz, 2H), 4.93 (s, 1H), 4.71 (s, 1H), 3.13 (s, 1H), 2.62 (s, 1H). <sup>13</sup>C NMR (100 MHz, CDCl<sub>3</sub>)  $\delta$  143.19, 143.04, 130.39 (q, *J*<sub>C-F</sub> = 32.2 Hz), 130.27 (q, *J*<sub>C-F</sub> = 32.3 Hz), 127.28, 127.23, 125.18 (q, *J*<sub>C-F</sub> = 3.8 Hz), 125.02 (q, *J*<sub>C-F</sub> = 3.8 Hz), 123.96 (q, *J*<sub>C-F</sub> = 270.4 Hz), 123.90 (q, *J*<sub>C-F</sub> = 270.4 Hz), 78.33, 77.10. <sup>19</sup>F NMR (376 MHz, CDCl<sub>3</sub>)  $\delta$  -62.54, -62.57.

### 1,2-Di-o-tolyethane-1,2-diol (2k)



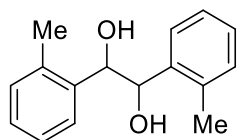

The title compound was synthesized according to the general procedure A. The product was purified by flash column chromatography. 91% (22 mg) isolated yield, colorless oil, *dl* : *meso* = 1.25 : 1. <sup>1</sup>H NMR (400 MHz, CDCl<sub>3</sub>) δ 7.60 (d, *J* = 7.6 Hz, 1H), 7.32 – 7.06 (m, 6H), 6.91 (d, *J* = 7.6 Hz, 1H), 5.17 (s, 1H), 4.94 (s, 1H), 3.05 (s, 1H), 2.30 (s, 1H), 2.15 (s, 3H), 1.63 (s, 1H). <sup>13</sup>C NMR (100 MHz, CDCl<sub>3</sub>) δ 138.02, 137.89, 136.08, 135.84, 130.11, 129.99, 127.70, 127.66, 127.12, 126.61, 126.02, 125.89, 74.53, 73.23, 19.13, 18.71.

### 1,2-Di-*m*-tolylethane-1,2-diol (2l)

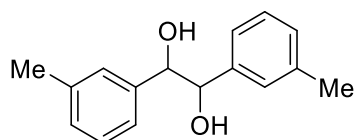

The title compound was synthesized according to the general procedure A. The product was purified by flash column chromatography. 95% (23 mg) isolated yield, white solid, *dl* : *meso* = 1 : 1.03. <sup>1</sup>H NMR (400 MHz, CDCl<sub>3</sub>) δ 7.22 (m, 1H), 7.13 – 6.98 (m, 6H), 6.89 (d, *J* = 7.6 Hz, 1H), 4.70 (s, 1H), 4.64 (s, 1H), 2.91 (s, 1H), 2.33 (s, 3H), 2.28 (s, 4H). <sup>13</sup>C NMR (100 MHz, CDCl<sub>3</sub>) δ 139.8, 137.95, 137.69, 128.91, 128.55, 128.17, 127.93, 127.76, 127.42, 124.22, 123.95, 78.72, 78.17, 21.40, 21.35.

### 1,2-Bis(3,4-dimethylphenyl)ethane-1,2-diol (2m)

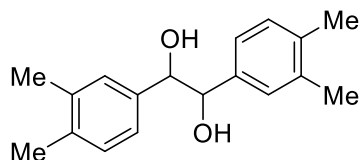

The title compound was synthesized according to the general procedure A. The product was purified by flash column chromatography. 96% (26 mg) isolated yield, white solid, *dl* : *meso* = 1.26 : 1. <sup>1</sup>H NMR (400 MHz, CDCl<sub>3</sub>) δ 7.17 – 7.09 (m, 3H), 7.02 – 7.01 (m, 2H), 6.87 (d, *J* = 7.6 Hz, 1H), 4.66 (s, 1H), 4.64 (s, 1H), 2.76 (s, 1H), 2.27 (s, 6H), 2.22 (d, *J* = 3.6 Hz, 5H), 2.01 (s, 1H). <sup>13</sup>C NMR (100 MHz, CDCl<sub>3</sub>) δ 137.70, 137.54, 136.67, 136.62, 136.30, 136.02, 129.63, 129.30, 128.28, 127.86, 124.63, 124.29, 78.30, 78.14, 19.81, 19.77, 19.52, 19.46.

### 1,2-Bis(3,4-dichlorophenyl)ethane-1,2-diol (2n)



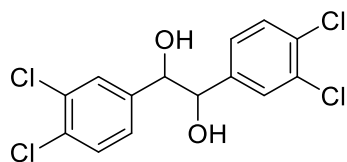

The title compound was synthesized according to the general procedure A. The product was purified by flash column chromatography. 71% (25 mg) isolated yield, white solid, *dl* : *meso* = 1 : 1. <sup>1</sup>H NMR (400 MHz, CDCl<sub>3</sub>) δ 7.32 (dd, *J* = 16.8, 8.4 Hz, 4H), 6.94 (dd, *J* = 8.4, 1.6 Hz, 1H), 6.81 (dd, *J* = 8.4, 1.2 Hz, 1H), 4.77 (s, 1H), 4.57 (s, 1H), 3.11 (br, 2H). <sup>13</sup>C NMR (100 MHz, CDCl<sub>3</sub>) δ 139.42, 139.37, 132.60, 132.43, 132.26, 132.16, 130.17, 130.09, 128.92, 128.70, 126.35, 126.32, 77.64, 76.43.

### 1,2-Bis(4-chloro-3-fluorophenyl)ethane-1,2-diol (2o)

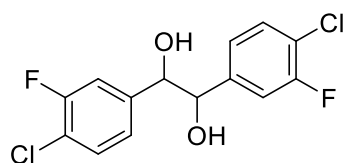

The title compound was synthesized according to the general procedure A. The product was purified by flash column chromatography. 66% (21 mg) isolated yield, white solid, *dl* : *meso* = 1 : 1.67. <sup>1</sup>H NMR (400 MHz, CDCl<sub>3</sub>) δ 7.32 – 7.24 (m, 2H), 7.05 – 7.01 (m, 2H), 6.86 (d, *J* = 8.0 Hz, 1H), 6.74 (d, *J* = 8.0 Hz, 1H), 4.84 (s, 1H), 4.61 (s, 1H), 2.95 (s, 1H), 2.45 (s, 1H). <sup>13</sup>C NMR (100 MHz, CDCl<sub>3</sub>) δ 159.08 (d, *J*<sub>C-F</sub> = 6.1 Hz), 156.60 (d, *J*<sub>C-F</sub> = 5.8 Hz), 140.15 (d, *J*<sub>C-F</sub> = 6.2 Hz), 140.03 (d, *J*<sub>C-F</sub> = 6.2 Hz), 130.36, 130.20, 123.34 (d, *J*<sub>C-F</sub> = 3.7 Hz), 123.27 (d, *J*<sub>C-F</sub> = 3.7 Hz), 120.70 (d, *J*<sub>C-F</sub> = 17.5 Hz), 120.55 (d, *J*<sub>C-F</sub> = 17.6 Hz), 115.13 (d, *J*<sub>C-F</sub> = 21.8 Hz), 114.99 (d, *J*<sub>C-F</sub> = 21.7 Hz), 77.83, 76.43. <sup>19</sup>F NMR (376 MHz, CDCl<sub>3</sub>) δ -114.53, -114.80. HRMS (ESI): *m/z* calcd for C<sub>14</sub>H<sub>9</sub>Cl<sub>2</sub>F<sub>2</sub>O<sub>2</sub> [M - H]<sup>-</sup> 316.9948, found 316.9953.

## 4. General Procedure B for the synthesis of pinacol products 2p–2ac.

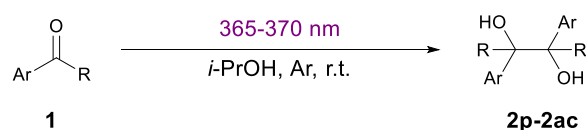

In an argon-filled glovebox, a 10 mL flame-dried quartz tube with magnetic stirring was charged sequentially with *i*-PrOH (2 mL) and substrates **1** (0.2 mmol) were sequentially added into the quartz tube. Then, the quartz tube was removed from glovebox. The mixture was stirred at room temperature under 10 W UVA light (365–370 nm) until the reaction was completed, as monitored by TLC analysis. The reaction mixture was then concentrated in vacuum. The crude product was purified



by flash column chromatography (silica gel, PE/EA) to afford the desired product. The corresponding HRMS data of the known product are available in the literature: (2p, 2q, 2s, 2t, 2u, 2y, 2ab)<sup>3</sup>; (2r, 2v)<sup>21</sup>, 2w<sup>22</sup>, 2aa<sup>23</sup>.

### 2,3-Diphenylbutane-2,3-diol (2p)

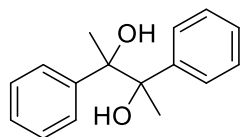

The title compound was synthesized according to the general procedure B. The product was purified by flash column chromatography. 99% (24 mg) isolated yield, white solid, *dl* : *meso* = 1.09 : 1. <sup>1</sup>H NMR (400 MHz, CDCl<sub>3</sub>) δ 7.25 – 7.17 (m, 10H), 2.61 (s, 1H), 2.30 (s, 1H), 1.58 (s, 3H), 1.49 (s, 3H). <sup>13</sup>C NMR (100 MHz, CDCl<sub>3</sub>) δ 143.70, 143.33, 127.33, 127.24, 127.11, 127.02, 126.88, 126.86, 78.81, 78.55, 25.05, 24.89.

### 2,3-Di-p-tolylbutane-2,3-diol (2q)

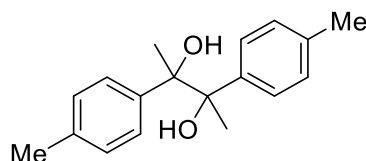

The title compound was synthesized according to the general procedure B. The product was purified by flash column chromatography. 99% (27 mg) isolated yield, colorless oil, *dl* : *meso* = 1 : 1.01. <sup>1</sup>H NMR (400 MHz, CDCl<sub>3</sub>) δ 7.17 – 7.06 (m, 10H), 2.60 (s, 1H), 2.35 (s, 3H), 2.34 (s, 3H), 2.24 (s, 1H), 1.55 (s, 3H), 1.48 (s, 3H). <sup>13</sup>C NMR (100 MHz, CDCl<sub>3</sub>) δ 140.84, 140.48, 136.52, 136.37, 127.98, 127.81, 127.26, 126.81, 78.72, 78.47, 25.17, 24.99, 20.96, 20.93.

### 2,3-Bis(4-ethylphenyl)butane-2,3-diol (2r)

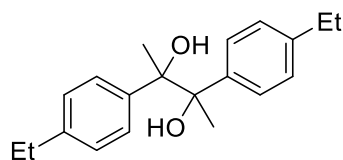

The title compound was synthesized according to the general procedure B. The product was purified by flash column chromatography. 94% (28 mg) isolated yield, colorless oil, *dl* : *meso* = 1.24 : 1. <sup>1</sup>H NMR (400 MHz, CDCl<sub>3</sub>) δ 7.22 – 7.08 (m, 8H), 2.69 – 2.60 (m, 5H), 2.21 (s, 1H), 1.55 (s, 3H), 1.48 (s, 3H), 1.25 (td, *J* = 7.6, 5.2 Hz, 6H). <sup>13</sup>C NMR (100 MHz, CDCl<sub>3</sub>) δ 142.87, 142.77, 141.07, 140.71, 127.29, 126.86, 126.77, 126.61, 78.73, 78.46, 28.33, 25.17, 25.04.

### 2,3-Bis(4-isopropylphenyl)butane-2,3-diol (2s)



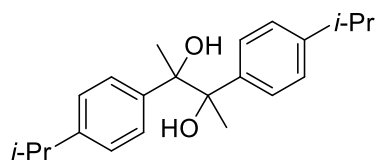

The title compound was synthesized according to the general procedure B. The product was purified by flash column chromatography. 99% (33 mg) isolated yield, white solid, *dl* : *meso* = 1.15 : 1. **<sup>1</sup>H NMR** (400 MHz, CDCl<sub>3</sub>)  $\delta$  7.23 (d, *J* = 8.0 Hz, 2H), 7.18 – 7.10 (m, 6H), 2.96 – 2.84 (m, 2H), 2.58 (s, 1H), 2.17 (s, 1H), 1.54 (s, 3H), 1.48 (s, 3H), 1.27 – 1.24 (m, 12H). **<sup>13</sup>C NMR** (100 MHz, CDCl<sub>3</sub>)  $\delta$  147.52, 147.41, 141.23, 140.88, 127.23, 126.81, 125.31, 125.20, 78.70, 78.41, 33.60, 25.16, 25.09, 24.03, 24.00, 23.94.

### 2,3-Bis(4-methoxyphenyl)butane-2,3-diol (2t)

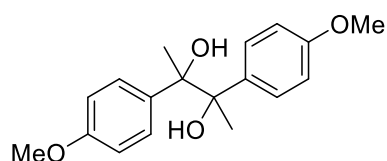

The title compound was synthesized according to the general procedure B. The product was purified by flash column chromatography. 83% (25 mg) isolated yield, white solid, *dl* : *meso* = 1.43 : 1. **<sup>1</sup>H NMR** (400 MHz, CDCl<sub>3</sub>)  $\delta$  7.11 (dd, *J* = 13.2, 8.8 Hz, 4H), 6.77 (dd, *J* = 9.2, 5.6 Hz, 4H), 3.80 (s, 3H), 3.79 (s, 3H), 2.56 (s, 1H), 2.28 (s, 1H), 1.55 (s, 3H), 1.46 (s, 3H). **<sup>13</sup>C NMR** (100 MHz, CDCl<sub>3</sub>)  $\delta$  158.53, 158.43, 136.03, 135.69, 128.57, 128.13, 112.56, 112.41, 78.73, 78.51, 55.22, 25.18, 25.02.

### 2,3-Bis(4-fluorophenyl)butane-2,3-diol (2u)

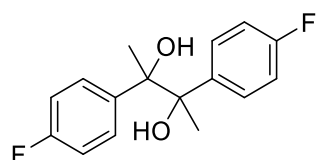

The title compound was synthesized according to the general procedure B. The product was purified by flash column chromatography. 83% (23 mg) isolated yield, white solid, *dl* : *meso* = 1.09 : 1. **<sup>1</sup>H NMR** (400 MHz, CDCl<sub>3</sub>)  $\delta$  7.15 (ddd, *J* = 23.2, 8.8, 5.6 Hz, 4H), 6.91 (dd, *J* = 15.6, 8.8 Hz, 4H), 2.53 (s, 1H), 2.30 (s, 1H), 1.57 (s, 3H), 1.49 (s, 3H). **<sup>13</sup>C NMR** (100 MHz, CDCl<sub>3</sub>)  $\delta$  163.16 (d, *J*<sub>C-F</sub> = 9.8 Hz), 160.71 (d, *J*<sub>C-F</sub> = 9.5 Hz), 139.42 (d, *J*<sub>C-F</sub> = 3.2 Hz), 139.03 (d, *J*<sub>C-F</sub> = 3.2 Hz), 129.04 (d, *J*<sub>C-F</sub> = 7.9 Hz), 128.65 (d, *J*<sub>C-F</sub> = 7.9 Hz), 114.03 (d, *J*<sub>C-F</sub> = 7.2 Hz), 113.82 (d, *J*<sub>C-F</sub> = 7.1 Hz), 78.56, 78.30, 25.14, 24.88. **<sup>19</sup>F NMR** (376 MHz, CDCl<sub>3</sub>)  $\delta$  -115.87, -116.16.

### 2,3-Bis(4-chlorophenyl)butane-2,3-diol (2v)



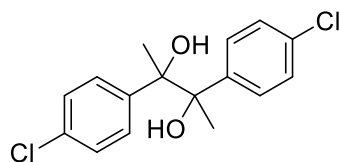

The title compound was synthesized according to the general procedure B. The product was purified by flash column chromatography. 77% (24 mg) isolated yield, white solid, *dl* : *meso* = 1.06 : 1. <sup>1</sup>H NMR (400 MHz, CDCl<sub>3</sub>)  $\delta$  7.22 – 7.15 (m, 6H), 7.09 (d, *J* = 8.4 Hz, 2H), 2.57 (s, 1H), 2.27 (s, 1H), 1.54 (s, 3H), 1.47 (s, 3H). <sup>13</sup>C NMR (100 MHz, CDCl<sub>3</sub>)  $\delta$  142.12, 141.66, 133.14, 132.96, 128.80, 128.44, 127.36, 127.29, 78.48, 78.20, 25.03, 24.71.

#### 4,4'-(2,3-Dihydroxybutane-2,3-diyl)dibenzonitrile (2w)

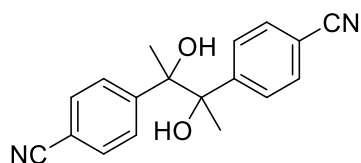

The title compound was synthesized according to the general procedure B. The product was purified by flash column chromatography. 99% (29 mg) isolated yield, white solid, *dl* : *meso* = 1 : 1.05. <sup>1</sup>H NMR (400 MHz, DMSO-*d*<sub>6</sub>)  $\delta$  7.71 (dd, *J* = 24.8, 8.5 Hz, 4H), 7.51 (d, *J* = 8.4 Hz, 2H), 7.23 (d, *J* = 8.4 Hz, 2H), 5.57 (s, 1H), 5.39 (s, 1H), 3.38 (s, 2H), 1.61 (s, 3H), 1.23 (s, 3H). <sup>13</sup>C NMR (100 MHz, CDCl<sub>3</sub>)  $\delta$  152.44, 152.11, 130.63, 130.18, 128.71, 127.98, 119.26, 119.23, 108.95, 108.53, 77.03, 76.77, 24.65, 24.31.

#### 2,3-Bis(2-chlorophenyl)butane-2,3-diol (2x)

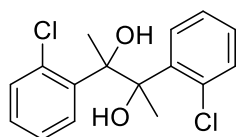

The title compound was synthesized according to the general procedure B. The product was purified by flash column chromatography. 74% (23 mg) isolated yield, colorless oil, *dl* : *meso* = 1 : 1.30. <sup>1</sup>H NMR (400 MHz, CDCl<sub>3</sub>)  $\delta$  7.49 (d, *J* = 8.0 Hz, 1H), 7.23 – 7.07 (m, 6H), 4.01 (s, 1H), 3.81 (s, 1H), 1.83 (s, 3H), 1.80 (s, 3H). <sup>13</sup>C NMR (100 MHz, CDCl<sub>3</sub>)  $\delta$  139.74, 139.70, 133.00, 132.53, 131.78, 131.74, 131.67, 131.27, 128.76, 128.69, 126.69, 126.03, 82.44, 81.92, 25.99, 25.54.

#### 2,3-Di-m-tolylbutane-2,3-diol (2y)

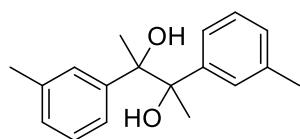

The title compound was synthesized according to the general procedure B. The product was purified



by flash column chromatography. 99% (27 mg) isolated yield, colorless oil, *dl* : *meso* = 1.18 : 1.  $^1\text{H}$  NMR (400 MHz,  $\text{CDCl}_3$ )  $\delta$  7.16 (t,  $J$  = 7.2 Hz, 2H), 7.06 (dd,  $J$  = 22.0, 8.0 Hz, 6H), 2.60 (s, 1H), 2.32 (s, 3H), 2.30 (s, 3H), 1.57 (s, 3H), 1.49 (s, 3H).  $^{13}\text{C}$  NMR (100 MHz,  $\text{CDCl}_3$ )  $\delta$  143.63, 143.28, 136.68, 136.47, 128.17, 127.76, 127.68, 127.55, 127.12, 126.95, 124.45, 123.95, 78.80, 78.55, 25.07, 24.98, 21.54.

### 2,3-Di-(3,4-dichlorophenyl)butane-2,3-diol (2z)

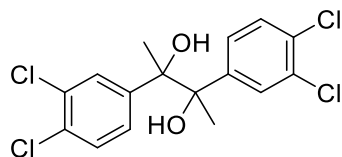

The title compound was synthesized according to the general procedure B. The product was purified by flash column chromatography. 68% (26 mg) isolated yield, colorless oil, *dl* : *meso* = 1. : 1.04.  $^1\text{H}$  NMR (400 MHz,  $\text{CDCl}_3$ )  $\delta$  7.47 (d,  $J$  = 2.0 Hz, 1H), 7.35 – 7.30 (m, 3H), 7.13 (dd,  $J$  = 8.4, 2.0 Hz, 1H), 6.91 (dd,  $J$  = 8.4, 1.6 Hz, 1H), 2.52 (s, 1H), 2.13 (s, 1H), 1.50 (s, 3H), 1.48 (s, 3H).  $^{13}\text{C}$  NMR (100 MHz,  $\text{CDCl}_3$ )  $\delta$  144.02, 143.37, 131.66, 131.64, 131.49, 131.28, 129.48, 129.31, 129.22, 129.09, 126.76, 126.57, 78.14, 77.79, 25.14, 24.65.

### 2,5-dimethyl-3,4-diphenylhexane-3,4-diol (2aa)

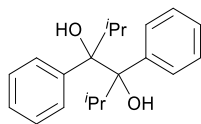

The title compound was synthesized according to the general procedure B. The product was purified by flash column chromatography. 68% (41 mg) isolated yield, colorless oil, *dl* : *meso* = 1. : 1.05.  $^1\text{H}$  NMR (400 MHz,  $\text{CDCl}_3$ )  $\delta$  7.47 (d,  $J$  = 6.8 Hz, 4H), 7.33 – 7.22 (m, 6H), 2.89 (s, 1H), 2.38 – 2.28 (m, 1H), 2.26 (s, 1H), 1.83 – 1.73 (m, 1H), 1.22 (d,  $J$  = 6.4 Hz, 3H), 0.75 (d,  $J$  = 6.8 Hz, 3H), 0.67 (d,  $J$  = 6.8 Hz, 3H), 0.36 (d,  $J$  = 6.8 Hz, 3H).  $^{13}\text{C}$  NMR (100 MHz,  $\text{CDCl}_3$ )  $\delta$  144.16, 143.05, 128.14, 127.32, 127.23, 126.98, 126.70, 126.41, 84.08, 83.80, 36.02, 35.02, 19.76, 19.64, 18.35, 18.29.

### 2,2',3,3'-Tetrahydro-1H,1'H-[1,1'-biindene]-1,1'-diol (2ab)

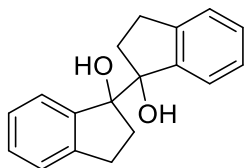

The title compound was synthesized according to the general procedure B. The product was purified by flash column chromatography. 83% (22 mg) isolated yield, white solid, *dl* : *meso* = 1. : 1.40.  $^1\text{H}$  NMR



(400 MHz, CDCl<sub>3</sub>)  $\delta$  7.80 (d,  $J$  = 7.2 Hz, 1H), 7.31 – 7.21 (m, 5H) 7.13 – 7.06 (m, 2H), 3.07 – 2.99 (m, 2H), 2.87 (s, 1H), 2.80 – 2.73 (m, 2H), 2.53 (s, 1H), 2.14 – 2.06 (m, 2H), 1.94 (t,  $J$  = 6.8 Hz, 2H). <sup>13</sup>C NMR (100 MHz, CDCl<sub>3</sub>)  $\delta$  145.38, 144.39, 144.13, 143.76, 128.58, 128.56, 126.74, 126.20, 125.10, 125.00, 124.83, 124.54, 88.48, 88.15, 36.55, 36.43, 30.14, 29.97.

### 3,3',4,4'-Tetrahydro-[1,1'-binaphthalene]-1,1'-(2H,2'H)-diol (2ac)

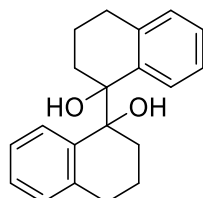

The title compound was synthesized according to the general procedure B. The product was purified by flash column chromatography. 88% (26 mg) isolated yield, white solid, *dl* : *meso* = 1.22 : 1. <sup>1</sup>H NMR (400 MHz, CDCl<sub>3</sub>)  $\delta$  8.19 (d,  $J$  = 7.6 Hz, 1H), 7.24 – 6.93 (m, 7H), 3.20 (s, 1H), 2.73 – 2.50 (m, 4H), 2.24 – 2.05 (m, 2H), 1.68 – 1.52 (m, 5H), 1.35 – 1.24 (m, 2H). <sup>13</sup>C NMR (100 MHz, CDCl<sub>3</sub>)  $\delta$  140.47, 140.01, 139.09, 138.33, 129.01, 128.82, 128.21, 127.17, 126.35, 125.53, 78.07, 77.10, 36.39, 35.36, 31.10, 30.78, 20.36, 20.02.

## 5. General Procedure for the synthesis of 1,2-diols 4 and 5.

In an argon-filled glovebox, a 10 mL flame-dried quartz tube with magnetic stirring was charged sequentially with solvent (2 mL), substrates **1** (0.2 mmol), and **3** (0.3mmol) were sequentially added into the quartz tube. Then, the quartz tube was removed from glovebox. The mixture was stirred at room temperature under 10 W UVA light (365–370 nm) until the reaction was completed, as monitored by TLC analysis. The reaction mixture was then concentrated in vacuum. The crude product was purified by flash column chromatography (silica gel, PE/EA) to afford the desired products. The corresponding HRMS data of the known product are available in the literature: (**4c**, **4d**, **4h**, **4i**, **4j**, **4m**, **4n**)<sup>24</sup>; (**4b**, **5m**)<sup>3</sup>, (**4e**, **4f**, **4k**)<sup>25</sup>, (**4a**, **4l**)<sup>26</sup>, **5c**<sup>2</sup>, **5k**<sup>27</sup>.

### 1-Phenyl-2-(4-(trifluoromethyl)phenyl)ethane-1,2-diol (**4a**)

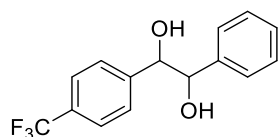

89% (50 mg) isolated yield, white solid, *dr* = 1.04 : 1. <sup>1</sup>H NMR (400 MHz, CDCl<sub>3</sub>)  $\delta$  7.50 – 7.43 (m, 2H),



7.28 – 7.13 (m, 6H), 7.08 – 7.04 (m, 1H), 4.87 – 4.78 (m, 1H), 4.70 – 4.57 (m, 1H), 3.08 (d,  $J = 162.8$  Hz, 2H).  $^{13}\text{C}$  NMR (100 MHz,  $\text{CDCl}_3$ )  $\delta$  143.74, 143.73, 143.41, 143.39, 143.18, 143.17, 139.71, 139.60, 139.33, 139.14, 130.51, 130.48, 130.39, 130.19, 130.16, 130.06, 129.84, 128.35, 128.32, 128.23, 128.16, 128.13, 127.99, 127.42, 127.33, 127.29, 127.10, 126.97, 126.94, 126.93, 125.48, 125.42, 125.39, 125.32, 125.22 – 124.82 (m), 122.78, 122.71, 122.68, 122.62, 120.05, 120.04, 119.98, 119.97, 79.10, 79.07, 78.48, 78.32, 78.06, 77.86, 77.28, 77.25.  $^{19}\text{F}$  NMR (376 MHz,  $\text{CDCl}_3$ )  $\delta$  -62.48, -62.51, -62.52, -62.56.

#### 1-Phenyl-2-(*p*-tolyl)ethane-1,2-diol (4b)

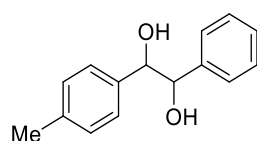

77% (35 mg) isolated yield, white solid, dr = 1.05 : 1.  $^1\text{H}$  NMR (400 MHz,  $\text{CDCl}_3$ )  $\delta$  7.30 – 7.27 (m, 1H), 7.25 – 7.19 (m, 2H), 7.16 – 7.09 (m, 3H), 7.04 – 6.97 (m, 3H), 4.79 – 4.71 (m, 1H), 4.66 – 4.61 (m, 1H), 2.99 (s, 1H), 2.33 – 2.28 (m, 4H).  $^{13}\text{C}$  NMR (100 MHz,  $\text{CDCl}_3$ )  $\delta$  140.00, 139.98, 139.90, 139.77, 137.84, 137.81, 137.57, 137.49, 137.02, 137.00, 136.92, 136.80, 129.00, 128.98, 128.84, 128.24, 128.21, 128.12, 128.11, 128.07, 128.05, 127.91, 127.85, 127.14, 127.12, 127.08, 127.06, 127.02, 126.98, 126.90, 126.87, 79.11, 79.02, 78.90, 78.80, 78.09, 78.07, 78.05, 78.04, 21.21, 21.17.

#### 1-(4-Ethylphenyl)-2-phenylethane-1,2-diol (4c)

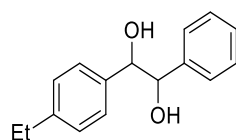

82% (40 mg) isolated yield, white solid, dr = 1.29 : 1.  $^1\text{H}$  NMR (400 MHz,  $\text{CDCl}_3$ )  $\delta$  7.31 – 7.01 (m, 10H), 4.80 – 4.71 (m, 1H), 4.68 – 4.63 (m, 1H), 2.95 (s, 1H), 2.67 – 2.56 (m, 3H), 2.27 (s, 1H), 1.28 – 1.17 (m, 5H).  $^{13}\text{C}$  NMR (100 MHz,  $\text{CDCl}_3$ )  $\delta$  144.25, 143.98, 143.88, 140.04, 139.90, 139.78, 137.35, 137.34, 137.18, 137.09, 128.25, 128.21, 128.12, 128.10, 128.07, 127.91, 127.87, 127.82, 127.65, 127.17, 127.15, 127.14, 127.12, 126.98, 126.91, 79.12, 78.95, 78.88, 78.68, 78.12, 78.09, 28.60, 28.59, 28.54, 15.56, 15.53.

#### 1-(4-Isopropylphenyl)-2-phenylethane-1,2-diol (4d)

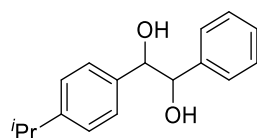



75% (38 mg) isolated yield, white solid, dr = 1.74 : 1. **<sup>1</sup>H NMR** (400 MHz, CDCl<sub>3</sub>) δ 7.32 – 7.28 (m, 2H), 7.25 – 7.17 (m, 3H), 7.15 – 7.04 (m, 4H), 4.77 – 4.65 (m, 2H), 2.93 – 2.82 (m, 2H), 2.17 (s, 1H), 1.25 – 1.19 (m, 6H). **<sup>13</sup>C NMR** (100 MHz, CDCl<sub>3</sub>) δ 148.97, 148.65, 148.52, 140.11, 140.08, 137.62, 137.58, 137.34, 137.28, 128.30, 128.12, 127.84, 127.17, 127.14, 126.95, 126.86, 126.80, 126.53, 126.46, 126.24, 78.86, 78.80, 78.47, 78.14, 33.87, 33.80, 24.00, 23.98.

#### 1-(4-Fluorophenyl)-2-phenylethane-1,2-diol (4e)

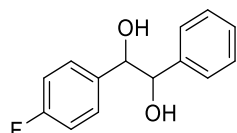

80% (37 mg) isolated yield, colorless oil, dr = 1.07 : 1. **<sup>1</sup>H NMR** (400 MHz, CDCl<sub>3</sub>) δ 7.30 – 6.87 (m, 10H), 4.83 – 4.80 (m, 1H), 4.67 – 4.60 (m, 1H), 3.02 (s, 1H), 2.39 (s, 1H). **<sup>13</sup>C NMR** (100 MHz, CDCl<sub>3</sub>) δ 163.73, 163.71, 163.65, 163.59, 161.27, 161.26, 161.20, 161.15, 139.63, 139.50, 135.52, 135.49, 135.43, 135.39, 135.38, 135.35, 135.32, 135.20, 135.17, 128.79, 128.74, 128.71, 128.67, 128.66, 128.59, 128.28, 128.23, 128.20, 128.11, 127.03, 126.96, 115.13 (dd, *J* = 8.1, 2.7 Hz), 114.92 (dd, *J* = 8.1, 2.7 Hz), 79.33, 78.72, 78.55, 78.02. **<sup>19</sup>F NMR** (376 MHz, CDCl<sub>3</sub>) δ -114.00, -114.09, -114.30, -114.33.

#### 1-(4-Chlorophenyl)-2-phenylethane-1,2-diol (4f)

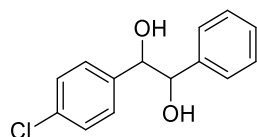

78% (39 mg) isolated yield, white solid, dr = 1 : 1. **<sup>1</sup>H NMR** (400 MHz, CDCl<sub>3</sub>) δ 7.30 – 7.15 (m, 6H), 7.11 – 7.04 (m, 2H), 7.00 – 6.96 (m, 1H), 4.80 – 4.77 (m, 1H), 4.67 – 4.55 (m, 1H), 3.10 (s, 1H), 2.47 (s, 1H). **<sup>13</sup>C NMR** (100 MHz, CDCl<sub>3</sub>) δ 139.80, 139.70, 139.52, 139.36, 138.26, 138.16, 138.00, 137.81, 133.84, 133.83, 133.70, 133.61, 128.47, 128.38, 128.35, 128.30, 128.24, 128.17, 128.15, 128.12, 127.96, 127.10, 127.01, 126.97, 126.95, 79.18, 79.11, 78.50, 78.48, 78.09, 77.92, 77.29, 77.12. **HRMS** (ESI): *m/z* calcd for C<sub>14</sub>H<sub>13</sub>Cl<sub>2</sub>O<sub>2</sub> [*M* + Cl]<sup>-</sup> 283.0293, found 283.0298.

#### 1-Phenyl-2-(4-(trifluoromethoxy)phenyl)ethane-1,2-diol (4g)

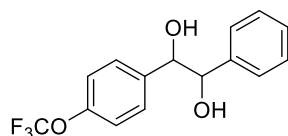

79% (47 mg) isolated yield, white solid, dr = 1.05 : 1. **<sup>1</sup>H NMR** (400 MHz, CDCl<sub>3</sub>) δ 7.28 – 7.05 (m, 9H), 4.78 (s, 1H), 4.61 (d, *J* = 28.4 Hz, 1H), 3.27 – 3.09 (m, 1H), 2.69 – 2.44 (m, 1H). **<sup>13</sup>C NMR** (100 MHz,



CDCl<sub>3</sub>)  $\delta$  148.90, 148.89, 148.83, 148.82, 148.75, 148.74, 139.77, 139.65, 139.50, 139.33, 138.45, 138.36, 138.21, 138.03, 128.52, 128.42, 128.38, 128.35, 128.28, 128.24, 128.22, 128.16, 128.14, 127.98, 127.11, 127.00, 126.96, 126.92, 120.62, 120.55, 120.49, 120.42 (qt,  $J_{C-F}$  = 255.7, 2.9 Hz), 79.18, 79.10, 78.40, 78.38, 78.07, 77.91, 77.15, 76.98. **<sup>19</sup>F NMR** (376 MHz, CDCl<sub>3</sub>)  $\delta$  -57.85, -57.89, -57.90, -57.93. **HRMS** (ESI):  $m/z$  calcd for C<sub>15</sub>H<sub>12</sub>F<sub>3</sub>O<sub>3</sub> [M - H]<sup>-</sup> 297.0739, found 297.0744.

#### 1-Phenyl-2-(*o*-tolyl)ethane-1,2-diol (4h)

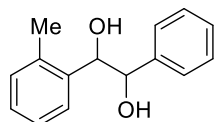

64% (29 mg) isolated yield, colorless oil, dr = 1.14 : 1. **<sup>1</sup>H NMR** (400 MHz, CDCl<sub>3</sub>)  $\delta$  7.64 – 6.94 (m, 9H), 5.20 – 4.68 (m, 2H), 3.12 (s, 1H), 2.39 (s, 1H), 1.97 (dd,  $J$  = 202.8, 35.2 Hz, 3H). **<sup>13</sup>C NMR** (100 MHz, CDCl<sub>3</sub>)  $\delta$  139.98, 139.88, 139.76, 139.70, 138.29, 138.13, 138.06, 137.99, 136.15, 136.03, 135.92, 130.18, 130.09, 130.06, 128.21, 128.17, 128.12, 128.07, 128.02, 127.91, 127.80, 127.75, 127.72, 127.25, 127.21, 127.11, 127.01, 126.97, 126.71, 126.66, 126.62, 126.07, 125.95, 79.10, 78.59, 78.07, 77.69, 74.84, 74.62, 73.86, 73.33, 19.32, 19.17, 18.83, 18.76.

#### 1-(2-Fluorophenyl)-2-phenylethane-1,2-diol (4i)

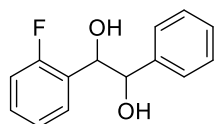

76% (35 mg) isolated yield, colorless oil, dr = 1.06 : 1. **<sup>1</sup>H NMR** (400 MHz, CDCl<sub>3</sub>)  $\delta$  7.43 – 6.85 (m, 9H), 5.32 – 4.99 (m, 1H), 4.91 – 4.64 (m, 1H), 3.08 – 2.45 (m, 2H). **<sup>13</sup>C NMR** (100 MHz, CDCl<sub>3</sub>)  $\delta$  161.31, 161.27, 161.20, 161.18, 158.86, 158.82, 158.75, 158.73, 139.83, 139.75, 139.70, 139.27, 129.60, 129.51, 129.49, 129.41, 129.33, 129.30, 129.25, 129.22, 128.50, 128.46, 128.42, 128.33, 128.29, 128.22, 128.20, 128.14, 128.10, 128.06, 127.99, 127.94, 127.12, 127.07, 126.98, 126.63, 124.16, 124.13, 124.11, 124.02, 123.99, 123.85, 123.82, 115.33, 115.29, 115.11, 115.05, 114.91, 114.83, 114.69, 79.11, 78.06, 77.76, 76.92, 72.88, 71.87, 71.46, 70.46. **<sup>19</sup>F NMR** (376 MHz, CDCl<sub>3</sub>)  $\delta$  -118.11, -118.16, -118.46, -118.61.

#### 1-Phenyl-2-(*m*-tolyl)ethane-1,2-diol (4j)

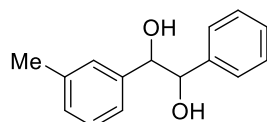



74% (34 mg) isolated yield, colorless oil, dr = 1.07 : 1. **<sup>1</sup>H NMR** (400 MHz, CDCl<sub>3</sub>) δ 7.30 – 7.18 (m, 4H), 7.13 – 7.01 (m, 4H), 6.97 – 6.85 (m, 1H), 4.78 – 4.69 (m, 1H), 4.66 – 4.60 (m, 1H), 2.98 (s, 1H), 2.29 (dd, *J* = 21.2, 6.4 Hz, 4H). **<sup>13</sup>C NMR** (100 MHz, CDCl<sub>3</sub>) δ 140.02, 139.99, 139.95, 137.99, 137.95, 137.76, 137.74, 128.95, 128.90, 128.64, 128.60, 128.23, 128.21, 128.20, 128.17, 128.11, 128.09, 128.06, 128.00, 127.99, 127.90, 127.86, 127.83, 127.79, 127.54, 127.51, 127.16, 127.11, 126.98, 126.96, 124.29, 124.23, 124.06, 124.02, 79.09, 78.98, 78.93, 78.80, 78.22, 78.18, 78.10, 78.06, 21.45, 21.41, 21.39.

### 1-(3-Fluorophenyl)-2-phenylethane-1,2-diol (4k)

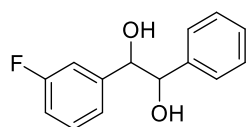

82% (38 mg) isolated yield, colorless oil, dr = 1.08 : 1. **<sup>1</sup>H NMR** (400 MHz, CDCl<sub>3</sub>) δ 7.28 – 7.06 (m, 6H), 6.93 – 6.75 (m, 3H), 4.77 – 4.75 (m, 1H), 4.64 – 4.56 (m, 1H), 3.18 (d, *J* = 56.8 Hz, 1H), 2.70 – 2.45 (m, 1H). **<sup>13</sup>C NMR** (100 MHz, CDCl<sub>3</sub>) δ 163.88, 163.83, 161.44, 161.39, 142.50, 142.42, 142.35, 142.27, 142.20, 142.07, 142.00, 139.79, 139.66, 139.55, 139.33, 129.72, 129.64, 129.62, 129.58, 129.55, 129.54, 129.50, 129.48, 128.26, 128.23, 128.18, 128.15, 128.11, 127.96, 127.11, 127.02, 126.96, 126.92, 122.76, 122.73, 122.68, 122.65, 122.62, 115.09, 115.04, 114.91, 114.88, 114.86, 114.83, 114.70, 114.65, 114.15, 114.07, 113.98, 113.93, 113.85, 113.76, 113.71, 79.09, 79.02, 78.47 (d, *J*<sub>C-F</sub> = 1.7 Hz), 78.37 (d, *J*<sub>C-F</sub> = 1.6 Hz), 78.06, 77.88, 77.29 (d, *J*<sub>C-F</sub> = 1.7 Hz), 77.12, 77.10. **<sup>19</sup>F NMR** (376 MHz, CDCl<sub>3</sub>) δ -112.85, -112.91, -113.08, -113.12.

### 1-(3-Chlorophenyl)-2-phenylethane-1,2-diol (4l)

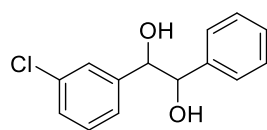

66% (33 mg) isolated yield, colorless oil, dr = 1.05 : 1. **<sup>1</sup>H NMR** (400 MHz, CDCl<sub>3</sub>) δ 7.29 – 7.07 (m, 8H), 7.03 – 6.85 (m, 1H), 4.79 – 4.73 (m, 1H), 4.65 – 4.55 (m, 1H), 3.10 (d, *J* = 55.2 Hz, 1H), 2.59 – 2.38 (m, 1H). **<sup>13</sup>C NMR** (100 MHz, CDCl<sub>3</sub>) δ 141.91, 141.85, 141.65, 141.50, 139.78, 139.68, 139.49, 139.33, 134.23, 134.18, 134.08, 134.06, 129.42, 129.37, 129.30, 129.29, 128.31, 128.29, 128.27, 128.25, 128.22, 128.16, 128.13, 128.09, 128.03, 127.97, 127.26, 127.19, 127.11, 127.03, 126.97, 126.95, 126.92, 125.34, 125.26, 125.25, 125.22, 79.09, 78.98, 78.42, 78.25, 78.08, 77.89, 77.32, 77.14.



### 1-Phenyl-2-(3-(trifluoromethyl)phenyl)ethane-1,2-diol (4m)

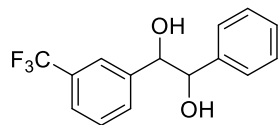

90% (51 mg) isolated yield, colorless oil, dr = 1.12 : 1. **<sup>1</sup>H NMR** (400 MHz, CDCl<sub>3</sub>)  $\delta$  7.51 – 7.44 (m, 1H), 7.36 – 7.15 (m, 7H), 7.11 – 7.01 (m, 1H), 4.84 – 4.76 (m, 1H), 4.68 – 4.53 (m, 1H), 3.43 – 2.50 (m, 2H). **<sup>13</sup>C NMR** (100 MHz, CDCl<sub>3</sub>)  $\delta$  140.72, 140.61, 140.36, 140.08, 139.69, 139.58, 139.26, 139.08, 130.71, 130.55, 130.50, 130.44, 130.31, 130.23, 130.12, 128.64, 128.46, 128.42, 128.35, 128.33, 128.30, 128.25, 128.17, 128.01, 127.11, 126.95, 126.91, 124.97, 124.93, 124.90, 124.86, 124.81, 124.78, 124.74, 124.63 (qd,  $J_{C-F}$  = 3.7, 1.7 Hz), 123.97 (q,  $J_{C-F}$  = 3.7 Hz), 123.77 (q,  $J_{C-F}$  = 3.9 Hz), 124.00 (qdd,  $J_{C-F}$  = 270.8, 10.9, 7.4 Hz), 79.18, 79.10, 78.53, 78.06, 77.81, 77.25, 76.98. **<sup>19</sup>F NMR** (376 MHz, CDCl<sub>3</sub>)  $\delta$  -62.58, -62.65, -62.71, -62.76.

### 1-(3,4-Dimethylphenyl)-2-phenylethane-1,2-diol (4n)

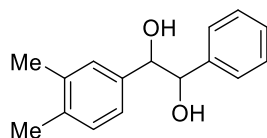

64% (31 mg) isolated yield, white solid, dr = 1.44 : 1. **<sup>1</sup>H NMR** (400 MHz, CDCl<sub>3</sub>)  $\delta$  7.34 – 6.80 (m, 8H), 4.80 – 4.61 (m, 2H), 2.82 (s, 1H), 2.25 – 2.18 (m, 7H). **<sup>13</sup>C NMR** (100 MHz, CDCl<sub>3</sub>)  $\delta$  140.20, 140.13, 139.90, 139.77, 137.76, 137.63, 137.38, 137.34, 136.69, 136.64, 136.62, 136.60, 136.37, 136.35, 136.19, 136.07, 129.69, 129.61, 129.38, 128.38, 128.33, 128.28, 128.21, 128.12, 128.10, 128.01, 127.97, 127.91, 127.80, 127.18, 127.10, 126.97, 124.70, 124.61, 124.36, 79.11, 78.82, 78.77, 78.41, 78.22, 78.18, 78.14, 78.08, 19.83, 19.81, 19.78, 19.75, 19.53, 19.49.

### 1-(3,5-Dimethylphenyl)-2-phenylethane-1,2-diol (4o)

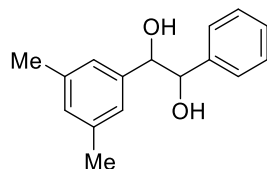

60% (28 mg) isolated yield, colorless oil, dr = 1.15 : 1. **<sup>1</sup>H NMR** (400 MHz, CDCl<sub>3</sub>)  $\delta$  7.34 – 7.21 (m, 5H), 7.16 – 7.10 (m, 1H), 6.94 – 6.74 (m, 2H), 4.81 – 4.61 (m, 2H), 2.94 – 2.68 (m, 1H), 2.29 – 2.08 (m, 6H). **<sup>13</sup>C NMR** (100 MHz, CDCl<sub>3</sub>)  $\delta$  140.14, 140.10, 139.86, 139.84, 139.76, 137.99, 137.68, 129.94, 129.53, 129.45, 128.31, 128.24, 128.19, 128.14, 128.11, 128.10, 127.93, 127.84, 127.20, 127.10, 126.96,



126.90, 124.93, 124.61, 124.49, 79.13, 78.89, 78.77, 78.41, 78.35, 78.17, 78.10, 21.38, 21.31, 21.27.

#### 1-(3,4-Dichlorophenyl)-2-phenylethane-1,2-diol (4p)

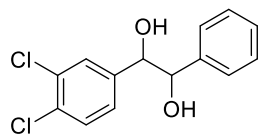

46% (26 mg) isolated yield, colorless oil, dr = 1.08 : 1.  $^1\text{H NMR}$  (400 MHz,  $\text{CDCl}_3$ )  $\delta$  7.33 – 7.15 (m, 6H), 7.10 – 7.07 (m, 1H), 6.97 – 6.76 (m, 1H), 4.79 – 4.50 (m, 2H), 3.20 – 2.33 (m, 2H).  $^{13}\text{C NMR}$  (100 MHz,  $\text{CDCl}_3$ )  $\delta$  140.34, 140.00, 139.72, 139.64, 139.63, 139.53, 139.22, 139.11, 132.59, 132.42, 132.22, 132.17, 132.12, 131.77, 131.74, 130.16, 130.08, 129.92, 129.89, 129.12, 128.98, 128.87, 128.79, 128.43, 128.41, 128.27, 128.18, 128.01, 127.10, 126.94, 126.52, 126.41, 126.38, 79.11, 79.02, 78.09, 77.90, 77.76, 77.61, 76.41.

#### 1-(*p*-Tolyl)-2-(4-(trifluoromethyl)phenyl)ethane-1,2-diol (5a)

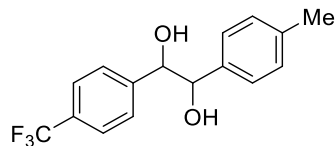

71% (42 mg) isolated yield, colorless oil, dr = 1.09 : 1.  $^1\text{H NMR}$  (400 MHz,  $\text{CDCl}_3$ )  $\delta$  7.54 – 7.45 (m, 2H), 7.32 – 6.96 (m, 6H), 4.89 – 4.56 (m, 2H), 3.22 (s, 1H), 2.88 (s, 1H), 2.33 – 2.29 (m, 3H).  $^{13}\text{C NMR}$  (100 MHz,  $\text{CDCl}_3$ )  $\delta$  143.92, 143.85, 143.41, 143.21, 138.19, 138.09, 137.91, 137.58, 136.89, 136.37, 136.22, 130.52, 130.41, 130.20, 130.08, 129.88, 129.76, 129.10, 129.07, 129.05, 128.87, 127.44, 127.33, 127.30, 127.06, 126.92, 126.86, 126.84, 125.18 (q,  $J_{\text{C-F}}$  = 3.7 Hz), 124.94 (q,  $J_{\text{C-F}}$  = 3.7 Hz), 124.04 (qd,  $J_{\text{C-F}}$  = 257.5, 13.1 Hz), 78.90, 78.81, 78.44, 78.36, 78.07, 77.89, 21.19, 21.16.  $^{19}\text{F NMR}$  (376 MHz,  $\text{CDCl}_3$ )  $\delta$  -62.45, -62.48, -62.52, -62.55. **HRMS** (ESI): m/z calcd for  $\text{C}_{16}\text{H}_{14}\text{F}_3\text{O}_2$  [ $\text{M} - \text{H}$ ] $^-$  295.0946, found 295.0956.

#### 1-(4-Chlorophenyl)-2-(4-(trifluoromethyl)phenyl)ethane-1,2-diol (5b)

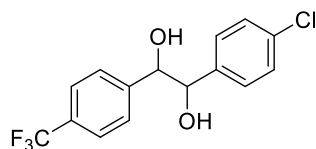

90% (57 mg) isolated yield, white solid, dr = 1.06 : 1.  $^1\text{H NMR}$  (400 MHz,  $\text{CDCl}_3$ )  $\delta$  7.52 – 7.46 (m, 2H), 7.23 – 7.13 (m, 4H), 7.03 (d,  $J$  = 8.4 Hz, 1H), 6.96 (dd,  $J$  = 8.4, 6.4 Hz, 1H), 4.88 – 4.75 (m, 1H), 4.65 – 4.52 (m, 1H), 3.23 (d,  $J$  = 33.2 Hz, 1H), 2.77 – 2.63 (m, 1H).  $^{13}\text{C NMR}$  (100 MHz,  $\text{CDCl}_3$ )  $\delta$  143.38, 143.29, 143.28, 143.26, 143.112, 143.11, 137.84, 137.73, 137.67, 137.54, 134.06, 134.00, 133.91, 133.89,



130.89, 130.57, 130.44, 130.43, 130.33, 130.25, 130.12, 130.01, 129.92, 129.80, 129.68, 128.50, 128.42, 128.37, 128.34, 128.32, 128.29, 127.34, 127.33, 127.30, 127.27, 125.23, 125.19, 125.15, 125.10, 125.06, 125.02, 124.98, 124.94, 124.00 (qdd,  $J_{C-F} = 270.6, 6.5, 3.3$  Hz), 78.49, 78.48, 78.38, 78.34.  $^{19}\text{F}$  NMR (376 MHz,  $\text{CDCl}_3$ )  $\delta$  -62.48, -62.51, -62.53, -62.55.

### 1,2-Bis(4-(trifluoromethyl)phenyl)ethane-1,2-diol (5c)

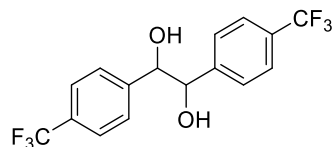

67% (47 mg) isolated yield, white solid, *dl/meso* = 1 : 1.11.  $^1\text{H}$  NMR (400 MHz,  $\text{CDCl}_3$ )  $\delta$  7.53 – 7.49 (m, 4H), 7.25 (d,  $J = 8.0$  Hz, 2H), 7.19 (d,  $J = 8.4$  Hz, 2H), 4.92 (s, 1H), 4.70 (s, 1H), 3.11 (s, 1H), 2.60 (s, 1H).  $^{13}\text{C}$  NMR (100 MHz,  $\text{CDCl}_3$ )  $\delta$  143.26, 143.12, 130.45 (q,  $J_{C-F} = 32.4$  Hz), 130.34 (q,  $J_{C-F} = 32.3$  Hz), 127.33, 127.27, 125.23 (q,  $J_{C-F} = 3.8$  Hz), 125.08 (q,  $J_{C-F} = 3.6$  Hz), 124.01 (q,  $J_{C-F} = 270.3$  Hz), 78.38, 77.16.  $^{19}\text{F}$  NMR (376 MHz,  $\text{CDCl}_3$ )  $\delta$  -62.56, -62.60.

### 1-(*o*-Tolyl)-2-(4-(trifluoromethyl)phenyl)ethane-1,2-diol (5d)

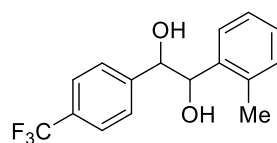

52% (31 mg) isolated yield, colorless oil, *dr* = 1.08 : 1.  $^1\text{H}$  NMR (400 MHz,  $\text{CDCl}_3$ )  $\delta$  7.61 – 7.42 (m, 2H), 7.32 – 6.90 (m, 6H), 5.16 – 4.74 (m, 2H), 3.33 – 2.31 (m, 2H), 2.21 – 1.64 (m, 3H).  $^{13}\text{C}$  NMR (100 MHz,  $\text{CDCl}_3$ )  $\delta$  143.94, 143.93, 143.66, 143.65, 138.08, 137.92, 137.78, 137.62, 136.17, 135.92, 135.75, 130.33, 130.24, 130.12, 130.21, 130.09, 129.92, 129.80, 128.09, 128.02, 127.79, 127.76, 127.63, 127.17, 127.06, 126.67, 126.56, 126.53, 126.29, 126.23, 126.09, 125.96, 124.84 (q,  $J_{C-F} = 3.7$  Hz), 124.11 (qd,  $J_{C-F} = 264.1, 6.3$  Hz).  $^{19}\text{F}$  NMR (376 MHz,  $\text{CDCl}_3$ )  $\delta$  -62.48, -62.52.

### 1-(2-Chlorophenyl)-2-(4-(trifluoromethyl)phenyl)ethane-1,2-diol (5e)

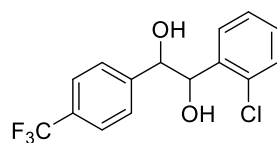

80% (51 mg) isolated yield, colorless oil, *dr* = 1.10 : 1.  $^1\text{H}$  NMR (400 MHz,  $\text{CDCl}_3$ )  $\delta$  7.61 – 7.46 (m, 2H), 7.39 (dd,  $J = 24.8, 8.0$  Hz, 1H), 7.31 – 7.00 (m, 5H), 5.55 – 4.66 (m, 2H), 3.29 – 2.78 (m, 2H).  $^{13}\text{C}$  NMR (100 MHz,  $\text{CDCl}_3$ )  $\delta$  144.09, 143.30, 143.10, 142.73, 137.54, 137.12, 136.61, 136.29, 133.37, 132.63, 132.40, 132.22, 130.54, 130.42, 130.22, 130.18, 130.13, 130.10, 129.86, 129.81, 129.56, 129.49,



129.30, 129.23, 129.14, 129.11, 129.08, 128.94, 128.85, 128.74, 128.41, 128.23, 127.65, 127.32, 127.27, 127.07, 126.85, 126.79, 126.73, 126.46, 125.19 (q,  $J_{C-F}$  = 3.8 Hz), 125.03 (q,  $J_{C-F}$  = 3.7 Hz), 124.56 (q,  $J_{C-F}$  = 3.7 Hz), 124.04, (qt,  $J_{C-F}$  = 270.6, 6.4 Hz), 78.36, 77.11, 76.00, 75.24, 74.40, 73.45, 73.04, 72.08,  $^{19}\text{F}$  NMR (376 MHz,  $\text{CDCl}_3$ )  $\delta$  -62.47, -62.52, -62.55. HRMS (ESI):  $m/z$  calcd for  $\text{C}_{15}\text{H}_{11}\text{ClF}_3\text{O}_2$   $[\text{M} - \text{H}]^-$  315.0400, found 315.0405.

### 1-(*m*-Tolyl)-2-(4-(trifluoromethyl)phenyl)ethane-1,2-diol (5f)

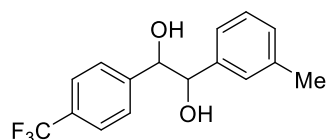

51% (30 mg) isolated yield, colorless oil, dr = 1.07 : 1.  $^1\text{H}$  NMR (400 MHz,  $\text{CDCl}_3$ )  $\delta$  7.54 – 7.30 (m, 2H), 7.25 – 7.03 (m, 5H), 6.98 – 6.85 (m, 2H), 4.88 – 4.55 (m, 2H), 3.26 – 2.89 (m, 1H), 2.32 – 2.18 (m, 4H).  $^{13}\text{C}$  NMR (100 MHz,  $\text{CDCl}_3$ )  $\delta$  143.91, 143.45, 143.23, 139.89, 139.36, 139.24, 138.11, 138.04, 137.79, 130.19, 130.12, 129.86, 129.74, 129.12, 129.03, 129.00, 128.65, 128.29, 128.24, 128.02, 127.82, 127.64, 127.49, 127.47, 127.33, 127.29, 125.16 (q,  $J_{C-F}$  = 3.7 Hz), 125.00 (q,  $J_{C-F}$  = 3.7 Hz), 124.92, 124.90, 124.89, 124.87, 124.83, 124.27, 124.06, 123.98, 124.07 (qdd,  $J_{C-F}$  = 270.5, 11.0, 5.0 Hz), 79.03, 78.81, 78.39, 78.34, 78.24, 78.00, 77.31, 21.43, 21.38, 21.33.  $^{19}\text{F}$  NMR (376 MHz,  $\text{CDCl}_3$ )  $\delta$  -62.50, -62.52, -62.56. HRMS (ESI):  $m/z$  calcd for  $\text{C}_{16}\text{H}_{14}\text{F}_3\text{O}_2$   $[\text{M} - \text{H}]^-$  295.0946, found 295.0956.

### 1-(3-Chlorophenyl)-2-(4-(trifluoromethyl)phenyl)ethane-1,2-diol (5g)

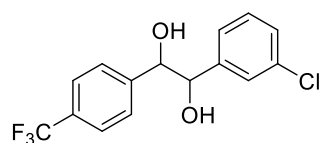

64% (40 mg) isolated yield, colorless oil, dr = 1.08 : 1.  $^1\text{H}$  NMR (400 MHz,  $\text{CDCl}_3$ )  $\delta$  7.52 – 7.47 (m, 1H), 7.25 – 7.10 (m, 5H), 6.99 – 6.93 (m, 1H), 6.87 – 6.82 (m, 1H), 4.85 – 4.74 (m, 1H), 4.66 – 4.74 (m, 1H), 3.26 – 3.18 (m, 1H), 2.71 – 2.62 (m, 1H).  $^{13}\text{C}$  NMR (100 MHz,  $\text{CDCl}_3$ )  $\delta$  143.41, 143.27, 141.54, 141.44, 141.41, 141.27, 134.34, 134.26, 134.24, 134.21, 130.26 (qd,  $J_{C-F}$  = 32.0, 7.0 Hz), 129.52, 129.45, 129.43, 129.40, 128.42, 128.33, 128.31, 127.35, 127.25, 127.17, 127.13, 126.93, 125.25, 125.19, 125.14, 125.10, 125.06, 125.02, 124.98, 124.94, 124.04 (qd,  $J_{C-F}$  = 270.6, 5.9 Hz), 78.32, 78.25, 77.15, 77.09.  $^{19}\text{F}$  NMR (376 MHz,  $\text{CDCl}_3$ )  $\delta$  -62.50, -62.52, -62.53, -62.55.

### 1-(3,4-Dichlorophenyl)-2-(4-(trifluoromethyl)phenyl)ethane-1,2-diol (5h)



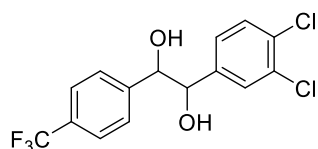

70% (49 mg) isolated yield, white solid, dr = 1.11 : 1.  $^1\text{H NMR}$  (400 MHz,  $\text{CDCl}_3$ )  $\delta$  7.51 (dd,  $J$  = 16.0, 8.4 Hz, 2H), 7.34 – 7.17 (m, 4H), 6.93 – 6.76 (m, 1H), 4.91 – 4.53 (m, 2H), 3.18 (d,  $J$  = 8.0 Hz, 1H), 2.66 (d,  $J$  = 4.4 Hz, 1H).  $^{13}\text{C NMR}$  (100 MHz,  $\text{CDCl}_3$ )  $\delta$  143.22, 143.14, 143.05, 139.54, 139.49, 139.44, 139.40, 132.64, 132.57, 132.46, 132.39, 132.31, 132.23, 132.20, 132.12, 130.68, 130.61, 130.55, 130.49, 130.35, 130.28, 130.22, 130.17, 130.12, 130.04, 129.00, 128.96, 128.77, 128.74, 127.32, 127.30, 127.27, 126.37, 126.33, 125.34, 125.30, 125.26, 125.21, 128.18, 125.15, 125.11, 125.09, 125.05, 125.02, 123.97 (qd,  $J_{\text{C-F}}$  = 270.3, 6.4 Hz), 78.37, 78.29, 77.76, 77.62, 77.14, 76.99, 76.56, 76.45.  $^{19}\text{F NMR}$  (376 MHz,  $\text{CDCl}_3$ )  $\delta$  -62.52, -62.54, -62.55, -62.57.

### 1-(3,5-Dichlorophenyl)-2-(4-(trifluoromethyl)phenyl)ethane-1,2-diol (5i)

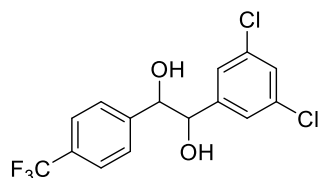

60% (42 mg) isolated yield, white solid, dr = 1.12 : 1.  $^1\text{H NMR}$  (400 MHz,  $\text{CDCl}_3$ )  $\delta$  7.57 – 7.49 (m, 2H), 7.30 – 7.19 (m, 4H), 7.00 (dd,  $J$  = 27.6, 2.0 Hz, 1H), 4.93 – 4.59 (m, 2H), 3.10 – 2.58 (m, 2H).  $^{13}\text{C NMR}$  (100 MHz,  $\text{CDCl}_3$ )  $\delta$  143.22, 143.10, 143.07, 143.01, 142.81, 142.72, 134.92, 134.78, 130.78, 130.68, 130.63, 130.51, 130.45, 130.36, 130.30, 130.19, 128.34, 128.24, 127.33, 127.31, 127.27, 127.19, 125.56, 125.39, 125.34, 125.30, 125.26, 125.23, 125.20, 125.16, 125.11, 125.07, 123.97 (qd,  $J_{\text{C-F}}$  = 265.3, 6.9 Hz), 78.39, 78.12, 77.77, 77.17, 76.99, 76.64.  $^{19}\text{F NMR}$  (376 MHz,  $\text{CDCl}_3$ )  $\delta$  -62.54, -62.57, -62.61, -62.63.

### 2-Methoxy-2-phenyl-1-(4-(trifluoromethyl)phenyl)ethan-1-ol (5j)

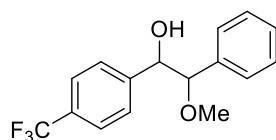

53% (31 mg) isolated yield, white solid, dr = 1.03 : 1  $^1\text{H NMR}$  (400 MHz,  $\text{CDCl}_3$ )  $\delta$  7.50 (d,  $J$  = 8.0 Hz, 1H), 7.42 (d,  $J$  = 8.0 Hz, 1H), 7.30 – 7.22 (m, 4H), 7.12 (d,  $J$  = 7.2 Hz, 2H), 6.99 (dd,  $J$  = 7.6, 2.4 Hz, 1H), 4.92 – 4.70 (m, 1H), 4.33 – 4.06 (m, 1H), 3.63 – 2.57 (m, 4H).  $^{13}\text{C NMR}$  (100 MHz,  $\text{CDCl}_3$ )  $\delta$  144.21, 143.25, 136.80, 136.73, 130.32, 130.15, 130.00, 129.82, 129.68, 129.50, 129.36, 129.18, 128.42, 128.34,



128.31, 128.27, 127.87, 127.77, 127.57, 127.37, 124.80, 124.76, 124.73, 124.69, 124.66, 124.18 (qd,  $J_{C-F} = 270.2, 9.8$  Hz), 88.96, 87.31, 78.11, 76.41, 57.16, 56.91.  $^{19}\text{F}$  NMR (376 MHz,  $\text{CDCl}_3$ )  $\delta$  -62.41, -62.49.

**(1,3-Dihydroisobenzofuran-1-yl)(4-(trifluoromethyl)phenyl)methanol (5k)**

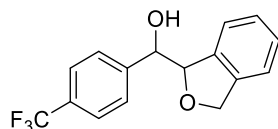

44% (26 mg) isolated yield, white solid, dr = 1.32 : 1  $^1\text{H}$  NMR (400 MHz,  $\text{CDCl}_3$ )  $\delta$  7.64 – 7.58 (m, 2H), 7.50 – 7.44 (m, 2H), 7.31 – 7.15 (m, 3H) 6.69 (dd,  $J = 53.6, 8.0$  Hz, 1H), 5.40 (d,  $J = 69.2$  Hz, 1H), 5.17 – 4.78 (m, 3H), 2.84 (d,  $J = 142.0$  Hz, 1H).  $^{13}\text{C}$  NMR (100 MHz,  $\text{CDCl}_3$ )  $\delta$  143.67, 143.53, 140.00, 139.72, 137.09, 137.04, 134.04, 130.84, 130.52, 130.33, 130.19, 130.00, 129.87, 129.68, 129.08, 128.31, 128.25, 127.96, 127.23, 127.13, 126.96, 125.25 (q,  $J_{C-F} = 3.7$  Hz), 125.07 (q,  $J_{C-F} = 3.7$  Hz), 123.97 (q,  $J_{C-F} = 3.7$  Hz), 124.16 (qd,  $J_{C-F} = 270.3, 2.9$  Hz), 122.66, 122.45, 121.12, 121.02, 87.74, 87.47, 76.16, 75.71, 73.60, 72.94.  $^{19}\text{F}$  NMR (376 MHz,  $\text{CDCl}_3$ )  $\delta$  -62.40, -62.46.

**(4-(Trifluoromethyl)phenyl)(9H-xanthen-9-yl)methanol (5l)**

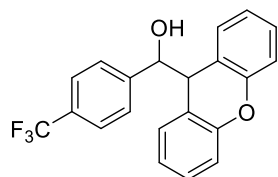

56% (40 mg) isolated yield, colorless oil, dr = 1 : 1  $^1\text{H}$  NMR (400 MHz,  $\text{CDCl}_3$ )  $\delta$  7.41 (d,  $J = 8.0$  Hz, 2H), 7.28 – 7.20 (m, 2H), 7.06 – 6.92 (m, 8H), 4.78 (d,  $J = 5.6$  Hz, 1H), 4.20 (d,  $J = 5.6$  Hz, 1H), 2.16 (s, 1H).  $^{13}\text{C}$  NMR (100 MHz,  $\text{CDCl}_3$ )  $\delta$  152.96, 152.94, 144.51, 129.89 (q,  $J_{C-F} = 32.0$  Hz), 129.67, 129.58, 128.58, 128.43, 127.10, 124.6 (q,  $J_{C-F} = 3.7$  Hz), 124.2 (q,  $J_{C-F} = 270.6$  Hz), 123.01, 121.08, 120.94, 116.62, 116.31, 78.72, 48.14.  $^{19}\text{F}$  NMR (376 MHz,  $\text{CDCl}_3$ )  $\delta$  -62.34. HRMS (ESI): m/z calcd for  $\text{C}_{21}\text{H}_{14}\text{F}_3\text{O}_2$  [ $\text{M} - \text{H}$ ] $^-$  355.0946, found 355.0942.

**1,2-Diphenylpropane-1,2-diol (5m)**

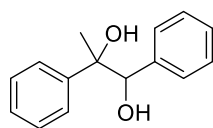

66% (30 mg) isolated yield, white solid, dr = 1.45 : 1  $^1\text{H}$  NMR (400 MHz,  $\text{CDCl}_3$ )  $\delta$  7.38 – 7.12 (m, 9H), 7.02 (d,  $J = 6.4$  Hz, 1H), 4.79 (d,  $J = 32.8$  Hz, 1H), 2.71 – 2.50 (m, 2H), 1.49 (d,  $J = 100.0$  Hz, 3H).  $^{13}\text{C}$



**NMR** (100 MHz, CDCl<sub>3</sub>)  $\delta$  145.01, 143.64, 139.41, 139.14, 128.16, 127.88, 127.74, 127.70, 127.58, 127.31, 127.09, 126.08, 125.88, 81.04, 80.86, 77.12, 76.85, 25.58, 24.14.

### 1-(3-Chlorophenyl)-2-phenylpropane-1,2-diol (5n)

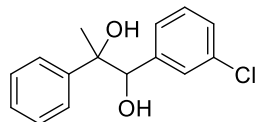

59% (28 mg) isolated yield, colorless oil, dr = 1.21 : 1 **<sup>1</sup>H NMR** (400 MHz, CDCl<sub>3</sub>)  $\delta$  7.36 – 7.05 (m, 8H), 6.90 (dd, *J* = 12.0, 8.0 Hz, 1H), 4.77 (d, *J* = 35.2 Hz, 1H), 2.71 – 2.41 (m, 2H), 1.51 (d, *J* = 98.0 Hz, 3H). **<sup>13</sup>C NMR** (100 MHz, CDCl<sub>3</sub>)  $\delta$  144.55, 143.32, 141.57, 141.18, 133.71, 133.51, 128.85, 128.68, 128.26, 127.88, 127.81, 127.79, 127.72, 127.57, 127.33, 125.95, 125.91, 125.85, 80.38, 80.32, 77.09, 76.78, 25.55, 23.71.

## 6. General Procedure for the synthesis of $\beta$ -amino alcohols 7a–7s.

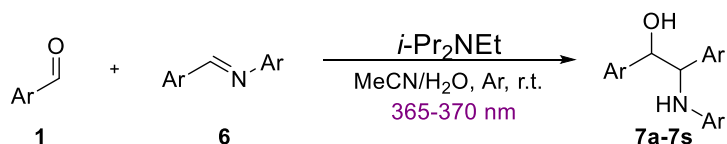

In an argon-filled glovebox, a 10 mL flame-dried quartz tube with magnetic stirring was charged sequentially with MeCN (0.5 mL), aldehydes (0.4 mmol), imines (0.2 mmol) and *i*-Pr<sub>2</sub>NEt (0.4 mmol) were sequentially added into the quartz tube. Then, the quartz tube was removed from glovebox, and H<sub>2</sub>O (0.05 mL) was injected into it. The mixture was stirred at room temperature under 10 W UVA LED (365–370 nm) until the reaction was completed, as monitored by TLC analysis. The reaction mixture was then concentrated in vacuum. The crude product was purified by flash column chromatography (silica gel, PE/EA) to afford the desired products. The corresponding HRMS data of the known product are available in the literature: (**7a**, **7e**, **7g**, **7j**, **7k**)<sup>28</sup>.

### 1,2-diphenyl-2-(phenylamino)ethan-1-ol (7a)

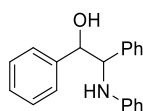

72% (42 mg) isolated yield, colorless oil, dr = 1 : 1.08. **<sup>1</sup>H NMR** (400 MHz, CDCl<sub>3</sub>)  $\delta$  7.28 – 7.20 (m, 8H), 7.14 – 7.11 (m, 1H), 7.09 – 7.03 (m, 3H), 6.64 (t, *J* = 7.2 Hz, 1H), 6.54 – 6.48 (m, 2H), 5.05 (d, *J* = 4.8 Hz, 0.48 × 1H), 4.85 (d, *J* = 1.2 Hz, 0.52 × 1H), 4.66 (d, *J* = 4.8 Hz, 0.48 × 1H), 4.52 (d, *J* = 6.0 Hz, 0.52 × 1H),



2.65 (brs,  $0.48 \times 1\text{H}$ ), 2.37 (brs,  $0.52 \times 1\text{H}$ ).  $^{13}\text{C}$  NMR (100 MHz,  $\text{CDCl}_3$ )  $\delta$  147.22, 146.72, 140.52, 140.18, 139.95, 138.41, 129.07, 129.02, 128.52, 128.24, 128.21, 128.20, 127.97, 127.85, 127.57, 127.47, 127.24, 126.52, 126.49, 117.86, 117.84, 114.07, 113.88, 78.01, 77.12, 64.66, 63.63.

### 2-phenyl-2-(phenylamino)-1-(p-tolyl)ethan-1-ol (7b)

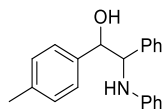

67% (41 mg) isolated yield, colorless oil, dr = 1 : 1.22.  $^1\text{H}$  NMR (400 MHz,  $\text{CDCl}_3$ )  $\delta$  7.28 – 7.09 (m, 6H), 7.08 – 7.02 (m, 4H), 6.96 (d,  $J$  = 8.0 Hz, 1H), 6.66 – 6.59 (m, 1H), 6.54 – 6.44 (m, 2H), 4.97 (d,  $J$  = 4.8 Hz,  $0.42 \times 1\text{H}$ ), 4.81 (d,  $J$  = 5.6 Hz,  $0.58 \times 1\text{H}$ ), 4.62 (d,  $J$  = 4.8 Hz,  $0.42 \times 1\text{H}$ ), 4.49 (d,  $J$  = 5.6 Hz,  $0.58 \times 1\text{H}$ ), 2.31 (d,  $J$  = 6.4 Hz, 3H).  $^{13}\text{C}$  NMR (100 MHz,  $\text{CDCl}_3$ )  $\delta$  147.27, 146.77, 140.30, 138.69, 137.66, 137.53, 137.48, 136.84, 129.12, 129.03, 128.99, 128.90, 128.48, 128.24, 128.19, 127.85, 127.70, 127.50, 127.39, 127.26, 127.10, 126.52, 126.48, 126.43, 126.41, 117.77, 117.72, 114.02, 113.86, 77.82, 77.09, 64.53, 63.58, 21.12. HRMS (ESI):  $m/z$  calcd for  $\text{C}_{21}\text{H}_{21}\text{NO}$   $[\text{M} + \text{H}]^+$  304.1696, found 304.1693.

### 1-(4-ethylphenyl)-2-phenyl-2-(phenylamino)ethan-1-ol (7c)

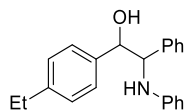

60% (38 mg) isolated yield, colorless oil, dr = 1 : 1.17.  $^1\text{H}$  NMR (400 MHz,  $\text{CDCl}_3$ )  $\delta$  7.25 – 7.21 (m, 4H), 7.20 – 7.17 (m, 2H), 7.12 – 7.08 (m, 2H), 7.06 – 6.99 (m, 3H), 6.65 – 6.60 (m, 1H), 6.52 – 6.47 (m, 2H), 4.98 – 4.96 (m,  $0.46 \times 1\text{H}$ ), 4.83 (d,  $J$  = 5.2 Hz,  $0.54 \times 1\text{H}$ ), 4.62 (d,  $J$  = 5.2 Hz,  $0.46 \times 1\text{H}$ ), 4.51 (d,  $J$  = 5.6 Hz,  $0.54 \times 1\text{H}$ ), 2.64 – 2.58 (m, 2H), 2.47 (brs,  $0.54 \times 1\text{H}$ ), 2.29 (brd,  $J$  = 5.2 Hz,  $0.46 \times 1\text{H}$ ), 1.20 (td,  $J$  = 7.6, 4.4 Hz, 3H).  $^{13}\text{C}$  NMR (100 MHz,  $\text{CDCl}_3$ )  $\delta$  147.26, 146.78, 144.08, 143.88, 140.37, 138.76, 137.80, 137.11, 129.02, 128.98, 128.48, 128.24, 127.86, 127.73, 127.71, 127.51, 127.38, 127.24, 126.52, 126.46, 117.75, 117.66, 113.98, 113.86, 77.82, 77.15, 64.41, 63.61, 28.49, 15.52. HRMS (ESI):  $m/z$  calcd for  $\text{C}_{22}\text{H}_{23}\text{NO}$   $[\text{M} + \text{H}]^+$  318.1852, found 318.1853.

### 1-(4-isopropylphenyl)-2-phenyl-2-(phenylamino)ethan-1-ol (7d)

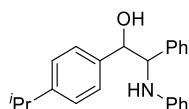

61% (40 mg) isolated yield, colorless oil, dr = 1 : 1.13.  $^1\text{H}$  NMR (400 MHz,  $\text{CDCl}_3$ )  $\delta$  7.24 – 7.20 (m, 4H), 7.19 – 7.16 (m, 2H), 7.15 – 7.12 (m, 2H), 7.06 – 7.01 (m, 3H), 6.64 – 6.60 (m, 1H), 6.51 – 6.47 (m, 2H), 4.97 – 4.93 (m,  $0.47 \times 1\text{H}$ ), 4.83 (d,  $J$  = 5.2 Hz,  $0.53 \times 1\text{H}$ ), 4.61 (d,  $J$  = 5.2 Hz,  $0.47 \times 1\text{H}$ ), 4.52 (d,  $J$  = 5.2



Hz, 0.53 × 1H), 2.91 – 2.83 (td,  $J$  = 12.4, 6.8 Hz, 1H), 2.45 (brs, 0.53 × 1H), 2.27 (brd,  $J$  = 5.2 Hz, 0.47 × 1H), 1.24 – 1.20 (m, 6H).  $^{13}\text{C}$  NMR (100 MHz,  $\text{CDCl}_3$ )  $\delta$  148.75, 148.51, 147.24, 146.78, 140.44, 138.84, 137.96, 137.26, 129.01, 128.98, 128.48, 128.25, 127.86, 127.52, 127.37, 127.22, 126.54, 126.42, 126.31, 126.28, 117.73, 117.59, 113.93, 113.86, 77.79, 77.18, 64.24, 63.62, 33.75, 23.94, 23.92. HRMS (ESI):  $m/z$  calcd for  $\text{C}_{23}\text{H}_{25}\text{NO}$  [ $\text{M} + \text{H}$ ] $^+$  332.2009, found 332.2008.

#### 1-(4-(tert-butyl)phenyl)-2-phenyl-2-(phenylamino)ethan-1-ol (7e)

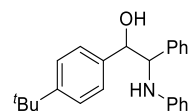

63% (43 mg) isolated yield, colorless oil, dr = 1 : 1.13.  $^1\text{H}$  NMR (400 MHz,  $\text{CDCl}_3$ )  $\delta$  7.31 – 7.30 (m, 2H), 7.26 – 7.19 (m, 6H), 7.06 – 7.02 (m, 3H), 6.64 – 6.60 (m, 1H), 6.51 – 6.47 (m, 2H), 4.95 (d,  $J$  = 8.0 Hz, 0.47 × 1H), 4.85 (d,  $J$  = 5.2 Hz, 0.53 × 1H), 4.61 (d,  $J$  = 5.2 Hz, 0.47 × 1H), 4.53 (d,  $J$  = 5.2 Hz, 0.53 × 1H), 2.40 (brs, 0.53 × 1H), 2.25 (brs, 0.47 × 1H), 1.29 (d,  $J$  = 3.2 Hz, 9H).  $^{13}\text{C}$  NMR (100 MHz,  $\text{CDCl}_3$ )  $\delta$  151.05, 150.77, 147.21, 146.78, 140.50, 138.90, 137.59, 136.87, 129.01, 128.98, 128.50, 128.27, 127.86, 127.54, 127.39, 127.20, 126.29, 126.13, 125.19, 125.16, 117.73, 117.56, 113.90, 113.88, 77.71, 77.16, 64.09, 63.62, 34.52, 34.48, 31.29.

#### 1-([1,1'-biphenyl]-4-yl)-2-phenyl-2-(phenylamino)ethan-1-ol (7f)

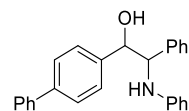

74% (54 mg) isolated yield, colorless oil, dr = 1 : 1.22.  $^1\text{H}$  NMR (400 MHz,  $\text{CDCl}_3$ )  $\delta$  7.57 – 7.54 (m, 2H), 7.49 (d,  $J$  = 7.6 Hz, 2H), 7.43 – 7.40 (m, 2H), 7.31 (d,  $J$  = 8.4 Hz, 2H), 7.24 – 7.21 (m, 4H), 7.18 – 7.11 (m, 2H), 7.08 – 7.04 (m, 2H), 6.66 – 6.63 (m, 1H), 6.55 – 6.51 (m, 2H), 5.06 (d,  $J$  = 4.8 Hz, 0.45 × 1H), 4.87 (d,  $J$  = 5.6 Hz, 0.55 × 1H), 4.68 (d,  $J$  = 4.8 Hz, 0.45 × 1H), 4.55 (d,  $J$  = 6.0 Hz, 0.55 × 1H), 2.66 (brs, 0.55 × 1H), 2.44 (brs, 0.45 × 1H).  $^{13}\text{C}$  NMR (100 MHz,  $\text{CDCl}_3$ )  $\delta$  147.15, 146.67, 140.67, 140.59, 140.57, 140.47, 140.14, 139.56, 138.90, 138.39, 129.07, 129.02, 128.75, 128.72, 128.54, 128.27, 127.86, 127.58, 127.49, 127.36, 127.28, 127.24, 126.99, 126.98, 126.96, 126.86, 126.81, 117.88, 117.84, 114.05, 113.90, 77.71, 76.89, 64.50, 63.54. HRMS (ESI):  $m/z$  calcd for  $\text{C}_{26}\text{H}_{23}\text{NO}$  [ $\text{M} + \text{H}$ ] $^+$  366.1852, found 366.1848.

#### 1-(4-chlorophenyl)-2-phenyl-2-(phenylamino)ethan-1-ol (7g)



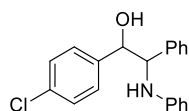

55% (36 mg) isolated yield, pale yellow oil, dr = 1: 1. **<sup>1</sup>H NMR** (400 MHz, CDCl<sub>3</sub>) δ 7.26 – 7.14 (m, 7H), 7.10 – 7.04 (m, 3H), 6.98 – 6.95 (m, 1H), 6.66 (t, *J* = 7.8 Hz, 1H), 6.57 – 6.48 (m, 2H), 5.04 (t, *J* = 4.8 Hz, 0.50 × 1H), 4.80 (d, *J* = 6.0 Hz, 0.50 × 1H), 4.63 (d, *J* = 4.8 Hz, 0.50 × 1H), 4.45 (d, *J* = 6.0 Hz, 0.50 × 1H), 2.71 (brs, 0.50 × 1H), 2.42 (brd, *J* = 5.6 Hz, 0.50 × 1H). **<sup>13</sup>C NMR** (100 MHz, CDCl<sub>3</sub>) δ 146.99, 146.51, 139.74, 139.00, 138.47, 137.90, 133.61, 133.48, 129.13, 129.08, 128.63, 128.33, 128.30, 128.27, 127.91, 127.84, 127.80, 127.71, 127.65, 127.19, 118.15, 118.10, 114.17, 113.94, 77.35, 76.30, 64.76, 63.49.

### 1-(4-bromophenyl)-2-phenyl-2-(phenylamino)ethan-1-ol (7h)

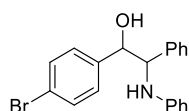

50% (37 mg) isolated yield, pale yellow oil, dr = 1.13 : 1. **<sup>1</sup>H NMR** (400 MHz, CDCl<sub>3</sub>) δ 7.39 – 7.36 (m, 2H), 7.25 – 7.19 (m, 4H), 7.11 – 7.05 (m, 4H), 6.91 (d, *J* = 8.4 Hz, 1H), 6.68 – 6.64 (m, 1H), 6.55 – 6.50 (m, 2H), 5.06 – 5.01 (m, 0.53 × 1H), 4.80 (d, *J* = 6.0 Hz, 0.47 × 1H), 4.64 (d, *J* = 4.8 Hz, 0.53 × 1H), 4.45 (d, *J* = 6.4 Hz, 0.47 × 1H), 2.74 (brs, 0.53 × H), 2.46 (brs, 0.47 × 1H). **<sup>13</sup>C NMR** (100 MHz, CDCl<sub>3</sub>) δ 146.98, 146.52, 139.74, 139.56, 139.02, 137.89, 131.24, 131.20, 129.13, 129.08, 128.64, 128.34, 128.26, 128.19, 127.81, 127.71, 127.66, 127.20, 121.78, 121.66, 118.14, 118.10, 114.17, 113.94, 77.39, 76.33, 64.70, 63.44. **HRMS** (ESI): *m/z* calcd for C<sub>20</sub>H<sub>18</sub>BrNO [M + H]<sup>+</sup> 368.0645, found 368.0645.

### 2-phenyl-2-(phenylamino)-1-(4-(trifluoromethyl)phenyl)ethan-1-ol (7i)

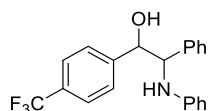

61% (43 mg) isolated yield, colorless oil, dr = 1 : 1. **<sup>1</sup>H NMR** (400 MHz, CDCl<sub>3</sub>) δ 7.50 (d, *J* = 6.4 Hz, 2H), 7.35 (d, *J* = 8.0 Hz, 1H), 7.25 – 7.20 (m, 4H), 7.15 (d, *J* = 8.0 Hz, 1H), 7.10 – 7.04 (m, 3H), 6.69 – 6.64 (m, 1H), 6.56 – 6.52 (m, 2H), 5.13 (d, *J* = 4.4 Hz, 0.5 × 1H), 4.89 (d, *J* = 6.0 Hz, 0.5 × 1H), 4.68 (d, *J* = 4.4 Hz, 0.5 × 1H), 4.50 (d, *J* = 5.6 Hz, 0.5 × 1H), 2.82 (brs, 0.5 × 1H), 2.57 (brs, 0.5 × 1H). **<sup>13</sup>C NMR** (100 MHz, CDCl<sub>3</sub>) δ 146.86, 146.44, 144.54, 144.53, 144.08, 144.07, 139.62, 137.62, 129.95 (qd, *J*<sub>C-F</sub> = 32.2, 7.6 Hz), 129.17, 129.11, 128.72, 128.37, 127.82, 127.78, 127.77, 127.15, 126.84, 126.82, 125.12 – 124.93 (m), 124.03 (qd, *J*<sub>C-F</sub> = 270.3, 1.9 Hz), 118.26, 114.20, 114.01, 77.40, 76.28, 64.67, 63.51. **<sup>19</sup>F NMR** (376



MHz, CDCl<sub>3</sub>)  $\delta$  -62.41, -62.42. **HRMS** (ESI):  $m/z$  calcd for C<sub>21</sub>H<sub>18</sub>F<sub>3</sub>NO [M + H]<sup>+</sup> 358.1413, found 358.1410.

### 2-phenyl-2-(phenylamino)-1-(4-(trifluoromethoxy)phenyl)ethan-1-ol (7j)

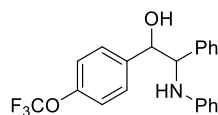

51% (38 mg) isolated yield, colorless oil, dr = 1 : 1.13. **<sup>1</sup>H NMR** (400 MHz, CDCl<sub>3</sub>)  $\delta$  7.26 – 7.21 (m, 4H), 7.19 – 7.16 (m, 1H), 7.12 – 7.05 (m, 6H), 6.66 (t,  $J$  = 7.2 Hz, 1H), 6.55 – 6.51 (m, 2H), 5.07 (d,  $J$  = 4.4 Hz, 0.47  $\times$  1H), 4.84 (d,  $J$  = 6.0 Hz, 0.53  $\times$  1H), 4.63 (d,  $J$  = 4.8 Hz, 0.47  $\times$  1H), 4.47 (d,  $J$  = 6.0 Hz, 0.53  $\times$  1H), 2.74 (brs, 0.53  $\times$  1H), 2.46 (brs, 0.47  $\times$  1H). **<sup>13</sup>C NMR** (100 MHz, CDCl<sub>3</sub>)  $\delta$  148.83, 148.81, 148.79, 148.78, 148.74, 148.72, 148.70, 148.69, 147.03, 146.57, 139.80, 139.28, 138.78, 137.94, 129.21, 129.16, 128.71, 128.41, 128.04, 127.98, 127.86, 127.84, 127.77, 127.23, 120.68, 120.61, 120.46 (q,  $J_{C-F}$  = 255.6) 118.26, 118.22, 114.27, 113.96, 77.27, 76.27, 64.83, 63.65. **<sup>19</sup>F NMR** (376 MHz, CDCl<sub>3</sub>)  $\delta$  -57.82, -57.83.

### 2-phenyl-2-(phenylamino)-1-(o-tolyl)ethan-1-ol (7k)

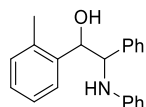

53% (32 mg) isolated yield, colorless oil, dr = 1 : 1.08. **<sup>1</sup>H NMR** (400 MHz, CDCl<sub>3</sub>)  $\delta$  7.62 (d,  $J$  = 6.4 Hz, 0.47  $\times$  1H), 7.24 – 7.17 (m, 6H), 7.09 – 7.03 (m, 4H), 6.93 (d,  $J$  = 7.6 Hz, 1H), 6.64 (t,  $J$  = 7.2 Hz, 1H), 6.53 – 6.49 (m, 2H), 5.29 – 5.26 (m, 0.48  $\times$  1H), 5.05 (d,  $J$  = 6.4 Hz, 0.52  $\times$  1H), 4.62 (d,  $J$  = 4.4 Hz, 0.48  $\times$  1H), 4.50 (d,  $J$  = 6.0 Hz, 0.52  $\times$  1H), 2.43 (brd,  $J$  = 3.2 Hz, 0.52  $\times$  1H), 2.26 (s, 1.40  $\times$  1H), 2.20 (brd,  $J$  = 5.2 Hz, 0.48  $\times$  1H), 1.96 (s, 1.59  $\times$  1H). **<sup>13</sup>C NMR** (100 MHz, CDCl<sub>3</sub>)  $\delta$  147.33, 146.71, 140.18, 139.01, 138.31, 138.14, 135.43, 135.07, 130.36, 130.22, 129.06, 128.99, 128.45, 128.11, 128.08, 127.71, 127.67, 127.55, 127.43, 127.13, 126.31, 126.27, 126.14, 125.84, 117.75, 117.73, 114.09, 113.84, 74.05, 73.52, 63.78, 62.12, 19.16, 18.95.

### 2-phenyl-2-(phenylamino)-1-(m-tolyl)ethan-1-ol (7l)

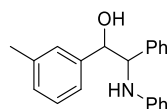

53% (32 mg) isolated yield, colorless oil, dr = 1 : 1.17. **<sup>1</sup>H NMR** (400 MHz, CDCl<sub>3</sub>)  $\delta$  7.25 – 7.22 (m, 4H), 7.17 – 7.14 (m, 2H), 7.09 – 7.03 (m, 4H), 6.90 – 6.87 (m, 1H), 6.63 (t,  $J$  = 7.4 Hz, 1H), 6.53 – 6.48 (m, 2H), 4.97 (d,  $J$  = 5.2 Hz, 0.46  $\times$  1H), 4.83 (d,  $J$  = 5.6 Hz, 0.54  $\times$  1H), 4.63 (d,  $J$  = 5.2 Hz, 0.46  $\times$  1H), 4.51 (d,



$J = 5.6$  Hz,  $0.54 \times 1\text{H}$ ), 2.29 (d,  $J = 6.8$  Hz, 3H).  **$^{13}\text{C}$  NMR** (100 MHz,  $\text{CDCl}_3$ )  $\delta$  147.24, 146.75, 140.44, 140.28, 139.84, 138.63, 137.90, 137.84, 129.04, 128.99, 128.75, 128.59, 128.50, 128.23, 128.09, 127.87, 127.57, 127.44, 127.23, 127.11, 123.60, 123.53, 117.80, 117.75, 114.05, 113.89, 77.97, 77.26, 64.56, 63.64, 21.41, 21.39. **HRMS** (ESI):  $m/z$  calcd for  $\text{C}_{21}\text{H}_{21}\text{NO}$   $[\text{M} + \text{H}]^+$  304.1696, found 304.1693.

### 1-(3-(tert-butyl)phenyl)-2-phenyl-2-(phenylamino)ethan-1-ol (7m)

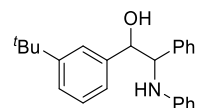

63% (43 mg) isolated yield, colorless oil, dr = 1 : 1.08.  **$^1\text{H}$  NMR** (400 MHz,  $\text{CDCl}_3$ )  $\delta$  7.28 – 7.14 (m, 8H), 7.09 – 7.04 (m, 3H), 6.64 (t,  $J = 7.2$  Hz, 1H), 6.54 – 6.49 (m, 2H), 5.10 – 5.06 (m,  $0.48 \times 1\text{H}$ ), 4.82 (d,  $J = 5.2$  Hz,  $0.52 \times 1\text{H}$ ), 4.68 – 4.63 (m,  $0.48 \times 1\text{H}$ ), 4.46 (d,  $J = 6.4$  Hz,  $0.52 \times 1\text{H}$ ), 2.57 (brs,  $0.52 \times 1\text{H}$ ), 2.40 (brd,  $J = 5.6$  Hz,  $0.48 \times 1\text{H}$ ), 1.19 (d,  $J = 9.2$  Hz, 9H).  **$^{13}\text{C}$  NMR** (100 MHz,  $\text{CDCl}_3$ )  $\delta$  150.84, 150.81, 147.34, 146.75, 140.15, 140.00, 139.29, 138.43, 129.06, 129.00, 128.40, 128.20, 127.97, 127.91, 127.83, 127.44, 127.38, 127.31, 124.87, 124.77, 123.98, 123.74, 123.38, 123.35, 117.82, 117.78, 114.11, 113.84, 78.42, 77.35, 64.99, 63.51, 34.54, 31.21, 31.16. **HRMS** (ESI):  $m/z$  calcd for  $\text{C}_{24}\text{H}_{27}\text{NO}$   $[\text{M} + \text{H}]^+$  346.2165, found 346.2165.

### 1-(3-chlorophenyl)-2-phenyl-2-(phenylamino)ethan-1-ol (7n)

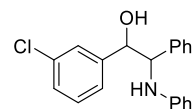

66% (43 mg) isolated yield, colorless oil, dr = 1 : 1.56.  **$^1\text{H}$  NMR** (400 MHz,  $\text{CDCl}_3$ )  $\delta$  7.30 – 7.16 (m, 7H), 7.13 – 7.01 (m, 4H), 6.68 – 6.64 (m, 1H), 6.55 – 6.51 (m, 2H), 5.04 (d,  $J = 8.0$  Hz,  $0.39 \times 1\text{H}$ ), 4.83 (d,  $J = 5.6$  Hz,  $0.39 \times 1\text{H}$ ), 4.65 (d,  $J = 4.8$  Hz,  $0.39 \times 1\text{H}$ ), 4.48 (d,  $J = 6.0$  Hz,  $0.61 \times 1\text{H}$ ), 2.69 (brs,  $0.33 \times 1\text{H}$ ), 2.40 (brs,  $0.37 \times 1\text{H}$ ).  **$^{13}\text{C}$  NMR** (100 MHz,  $\text{CDCl}_3$ )  $\delta$  146.93, 146.47, 142.62, 142.16, 139.73, 137.79, 134.12, 129.37, 129.34, 129.12, 129.06, 128.65, 128.32, 128.00, 127.92, 127.78, 127.70, 127.15, 126.69, 126.64, 124.67, 124.62, 118.10, 114.16, 113.97, 77.20, 76.29, 64.62, 63.48. **HRMS** (ESI):  $m/z$  calcd for  $\text{C}_{20}\text{H}_{18}\text{ClNO}$   $[\text{M} + \text{H}]^+$  324.1150, found 324.1149.

### 1-(3,5-dimethylphenyl)-2-phenyl-2-(phenylamino)ethan-1-ol (7o)

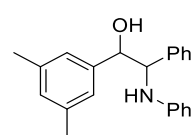



58% (36 mg) isolated yield, colorless oil, dr = 1 : 1.04. **<sup>1</sup>H NMR** (400 MHz, CDCl<sub>3</sub>) δ 7.28 – 7.16 (m, 6H), 7.06 – 7.02 (m, 2H), 6.87 (s, 1H), 6.70 (d, *J* = 1.2 Hz, 1H), 6.62 (t, *J* = 7.2 Hz, 1H), 6.52 – 6.47 (m, 2H), 4.93 – 4.86 (m, 0.49 × 1H), 4.79 (d, *J* = 2.8 Hz, 0.51 × 1H), 4.59 (d, *J* = 4.0 Hz, 0.49 × 1H), 4.50 (d, *J* = 5.2 Hz, 0.51 × 1H), 2.25 (d, *J* = 3.6 Hz, 6H). **<sup>13</sup>C NMR** (100 MHz, CDCl<sub>3</sub>) δ 147.25, 146.76, 140.38, 140.37, 139.74, 138.82, 137.77, 137.69, 129.66, 129.44, 129.00, 128.95, 128.47, 128.20, 127.87, 127.56, 127.40, 127.22, 124.37, 124.15, 117.73, 117.63, 114.01, 113.89, 77.92, 77.38, 64.41, 63.61, 21.29, 21.27. **HRMS** (ESI): *m/z* calcd for C<sub>22</sub>H<sub>23</sub>NO [M + H]<sup>+</sup> 318.1852, found 318.1852.

### 1-(3,4-dimethylphenyl)-2-phenyl-2-(phenylamino)ethan-1-ol (7p)

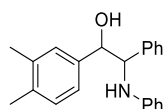

57% (36 mg) isolated yield, colorless oil, dr = 1.22 : 1. **<sup>1</sup>H NMR** (400 MHz, CDCl<sub>3</sub>) δ 7.25 – 7.18 (m, 5H), 7.06 – 6.96 (m, 4H), 6.86 – 6.80 (m, 1H), 6.62 (t, *J* = 7.2 Hz, 1H), 6.49 (t, *J* = 7.4 Hz, 2H), 4.92 – 4.89 (m, 0.55 × 1H), 4.80 (d, *J* = 5.6 Hz, 0.45 × 1H), 4.60 (d, *J* = 5.4 Hz, 0.55 × 1H), 4.50 (d, *J* = 5.6 Hz, 0.45 × 1H), 2.21 (dd, *J* = 9.2, 6.8 Hz, 6H). **<sup>13</sup>C NMR** (100 MHz, CDCl<sub>3</sub>) δ 147.38, 146.90, 140.52, 139.04, 138.04, 137.33, 136.58, 136.49, 136.46, 136.20, 129.53, 129.51, 129.08, 129.05, 128.56, 128.32, 127.96, 127.89, 127.70, 127.60, 127.45, 127.35, 124.08, 123.93, 117.80, 117.71, 114.07, 113.98, 77.86, 77.35, 64.47, 63.71, 19.87, 19.85, 19.56, 19.54. **HRMS** (ESI): *m/z* calcd for C<sub>22</sub>H<sub>23</sub>NO [M + H]<sup>+</sup> 318.1852, found 318.1850.

### 1-phenyl-2-(phenylamino)-2-(p-tolyl)ethan-1-ol (7q)

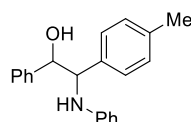

61% (36 mg) isolated yield, colorless oil, dr = 1 : 1.04. **<sup>1</sup>H NMR** (400 MHz, CDCl<sub>3</sub>) δ 7.28 – 7.26 (m, 3H), 7.11 – 6.99 (m, 8H), 6.63 (t, *J* = 7.2 Hz, 1H), 6.52 – 6.47 (m, 2H), 4.99 (d, *J* = 4.4 Hz, 0.49 × 1H), 4.83 (d, *J* = 5.6 Hz, 0.51 × 1H), 4.61 (d, *J* = 4.8 Hz, 0.49 × 1H), 4.48 (d, *J* = 5.6 Hz, 0.51 × 1H), 2.28 (d, *J* = 2.8 Hz, 3H). **<sup>13</sup>C NMR** (100 MHz, CDCl<sub>3</sub>) δ 147.25, 146.76, 140.58, 140.04, 137.17, 137.05, 137.03, 135.25, 129.23, 129.03, 129.01, 128.99, 128.18, 127.90, 127.76, 127.68, 127.07, 126.51, 117.76, 117.74, 114.04, 113.85, 77.94, 77.14, 64.28, 63.37, 21.09, 21.06. **HRMS** (ESI): *m/z* calcd for C<sub>21</sub>H<sub>21</sub>NO [M + H]<sup>+</sup> 304.1696, found 304.1696.

### 1-phenyl-2-(phenylamino)-2-(m-tolyl)ethan-1-ol (7r)



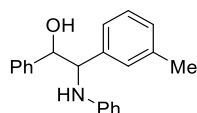

68% (41 mg) isolated yield, colorless oil, dr = 1.08 : 1. **<sup>1</sup>H NMR** (400 MHz, CDCl<sub>3</sub>) δ 7.30 – 7.20 (m, 3H), 7.15 – 7.00 (m, 7H), 6.93 (d, *J* = 8.0 Hz, 1H), 6.65 – 6.61 (m, 1H), 6.52 – 6.48 (m, 2H), 4.97 (d, *J* = 4.2 Hz, 0.52 × 1H), 4.84 (d, *J* = 5.6 Hz, 0.48 × 1H), 4.59 (d, *J* = 4.8 Hz, 0.52 × 1H), 4.47 (d, *J* = 5.6 Hz, 0.48 × 1H), 2.56 (brs, 0.43 × 1H), 2.34 (brs, 0.57 × 1H), 2.26 (d, *J* = 5.6 Hz, 3H). **<sup>13</sup>C NMR** (100 MHz, CDCl<sub>3</sub>) δ 147.29, 146.80, 140.57, 140.16, 139.96, 138.42, 138.13, 137.85, 129.04, 128.99, 128.45, 128.40, 128.39, 128.26, 128.16, 127.96, 127.79, 127.76, 126.55, 126.43, 124.84, 124.23, 117.77, 117.68, 113.96, 113.83, 77.88, 77.19, 64.52, 63.69, 21.45, 21.44. **HRMS** (ESI): *m/z* calcd for C<sub>21</sub>H<sub>21</sub>NO [M + H]<sup>+</sup> 304.1696, found 304.1694.

### 1-phenyl-2-(phenylamino)-2-(o-tolyl)ethan-1-ol (7s)

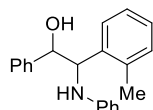

66% (40 mg) isolated yield, colorless oil, dr = 3 : 1. **<sup>1</sup>H NMR** (400 MHz, CDCl<sub>3</sub>) δ 7.28 – 7.18 (m, 4H), 7.16 – 7.01 (m, 7H), 6.63 (t, *J* = 7.2 Hz, 1H), 6.49 – 6.42 (m, 2H), 5.02 (t, *J* = 4.0 Hz, 0.75 × 1H), 4.90 (d, *J* = 4.8 Hz, 0.75 × 1H), 4.85 (d, *J* = 5.6 Hz, 0.25 × 1H), 4.73 (d, *J* = 5.6 Hz, 0.25 × 1H), 2.69 (brs, 0.25 × 1H), 2.44 (brs, 0.75 × 1H), 2.13 (d, *J* = 10.0 Hz, 3H). **<sup>13</sup>C NMR** (100 MHz, CDCl<sub>3</sub>) δ 147.23, 146.74, 140.50, 139.91, 138.39, 136.66, 136.55, 135.76, 130.65, 130.29, 129.10, 129.06, 128.14, 128.08, 127.72, 127.31, 126.91, 126.77, 126.44, 126.22, 126.10, 117.81, 115.10, 113.80, 113.63, 76.64, 76.53, 60.41, 59.01, 19.27, 19.20. **HRMS** (ESI): *m/z* calcd for C<sub>21</sub>H<sub>21</sub>NO [M + H]<sup>+</sup> 304.1696, found 304.1696.

## 7. Radical Trapping Experiments

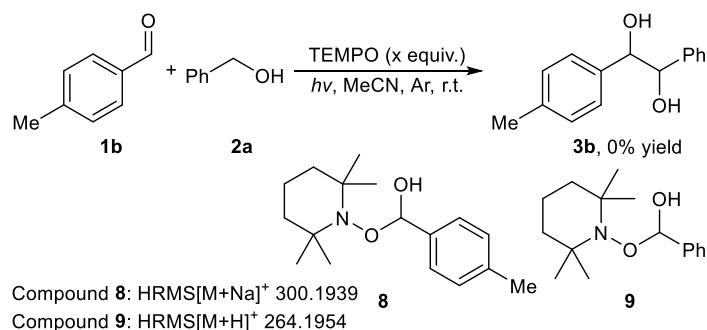

In an argon-filled glovebox, a 10 mL flame-dried quartz tube with magnetic stirring was charged sequentially with 2,2,6,6-tetramethylpiperidinoxy (TEMPO) (0.8 mmol, 4.0 eq), MeCN (2 mL), *p*-tolualdehyde **1b** (0.2 mmol, 1.0 eq) and benzyl alcohol **2a**



(0.3 mmol, 1.5 eq) sequentially added into the quartz tube. Then, the quartz tube was removed from glovebox. After stirring the mixture at room temperature under 10 W UVA light (365–370 nm) for 36 h, the 1,2-diol **3b** not obtained. Moreover, the ketyl radical addition product **8** and **9** were detected by HRMS. HRMS (ESI) of compound **8** : m/z calcd for C<sub>17</sub>H<sub>27</sub>NO<sub>2</sub>Na [M + Na]<sup>+</sup> 300.1934, found 300.1939. HRMS (ESI) of compound **9**: m/z calcd for C<sub>16</sub>H<sub>26</sub>NO<sub>2</sub> [M + H]<sup>+</sup> 264.1958, found 264.1954.

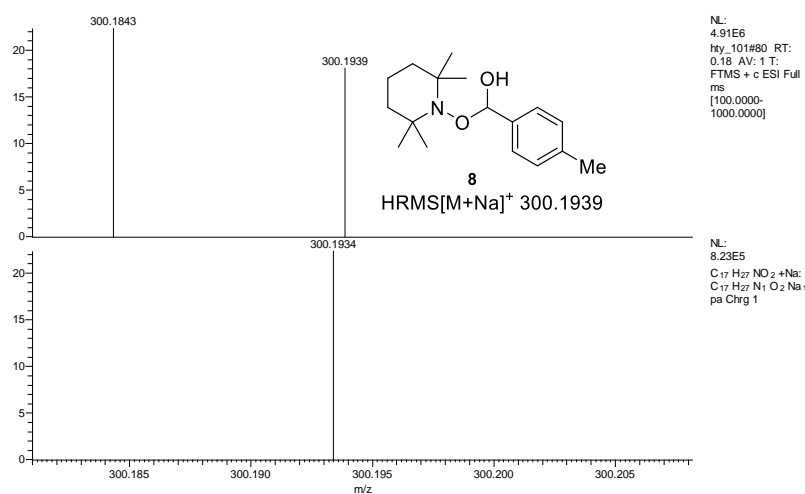

**Figure S1.** HRMS (ESI) of ketyl radical addition product **8**.

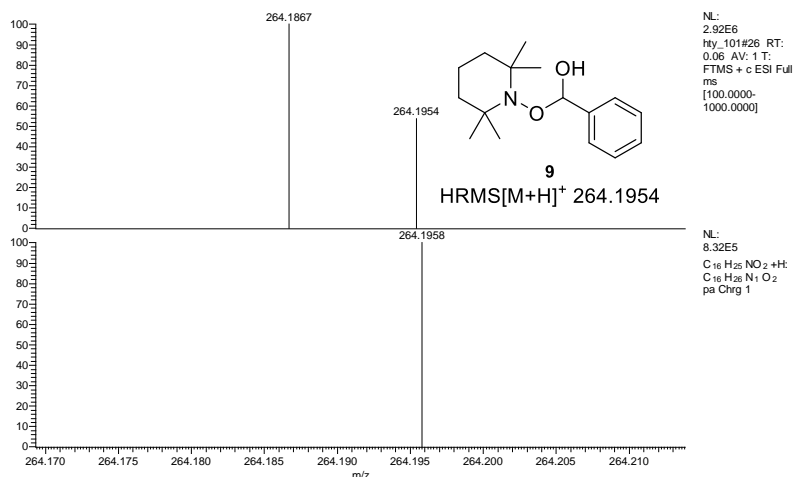

**Figure S2.** HRMS (ESI) of ketyl radical addition product **9**.

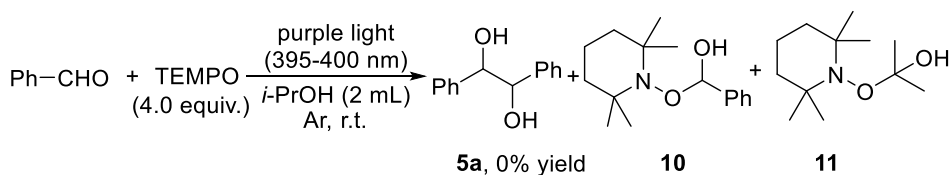

In an argon-filled glovebox, a 10 mL flame-dried quartz tube with magnetic stirring



was charged sequentially with 2,2,6,6-tetramethylpiperidinoxy (TEMPO) (0.8 mmol, 4.0 eq), *i*-PrOH (2 mL) and benzaldehyde (0.2 mmol, 1.0 eq) sequentially added into the quartz tube. Then, the quartz tube was removed from glovebox. The mixture was stirred at room temperature under 10 W purple light for 12 h. The pinacol coupling of benzaldehyde was inhibited completely by the addition of 4.0 equiv. of 2,2,6,6-tetramethylpiperidinoxy (TEMPO) as a radical scavenger. Moreover, the ketyl radical addition product **10** and carbon center radical addition product **11** were detected by HRMS. HRMS (ESI) of compound **10**:  $m/z$  calcd for  $C_{16}H_{26}NO_2$   $[M + H]^+$  264.1958, found 264.1951. HRMS (ESI) of compound **11**:  $m/z$  calcd for  $C_{12}H_{26}NO_2$   $[M + H]^+$  216.1958, found 216.1955.

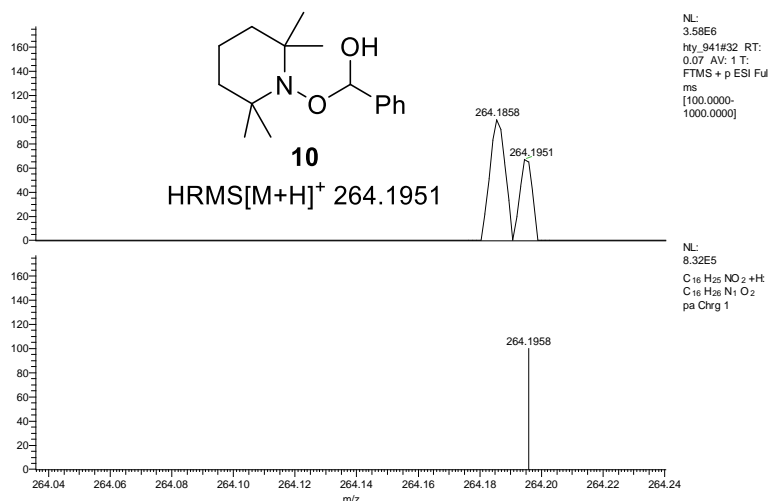

**Figure S3.** HRMS (ESI) of ketyl radical addition product **10**.

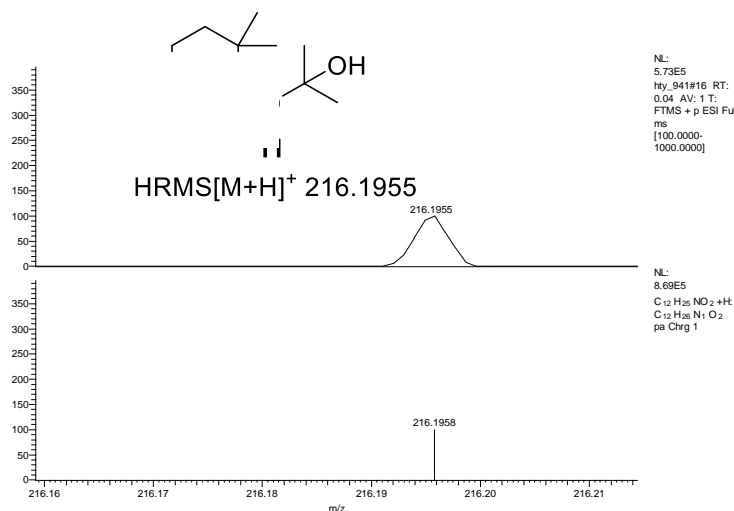

**Figure S4.** HRMS (ESI) of carbon center radical addition product **11**.



## 8. Cyclic voltammetry analysis

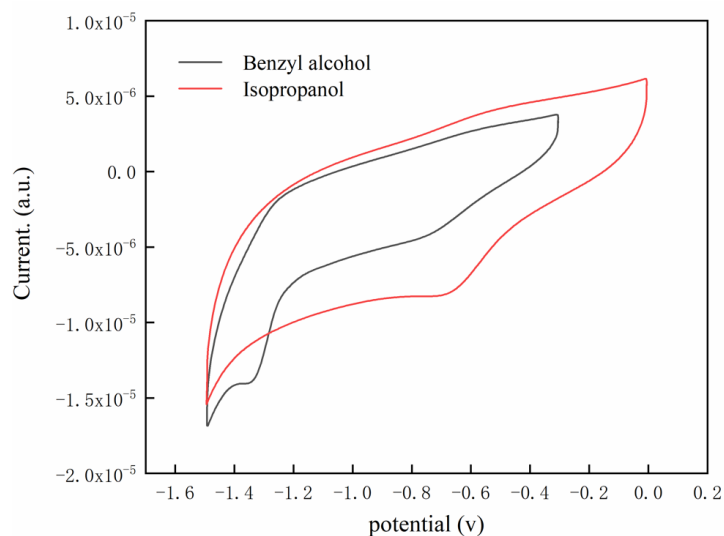

**Figure S5.** Cyclic voltammograms during controlled potential coulometry of 5.0 mmol benzyl alcohol or isopropanol in aqueous solution of phosphatebuffer (30 mL, pH = 7.8–8.0) and MeCN (1mL). Scan rate:  $100 \text{ mV s}^{-1}$ ;  $t = 25 \pm 1 \text{ }^{\circ}\text{C}$ .

## 9. UV-vis Studies

In a glass tube, 4-(trifluoromethyl)benzaldehyde (0.2 mmol, 28  $\mu\text{L}$ ), benzyl alcohol (0.2 mmol, 21  $\mu\text{L}$ ) or its mixture into MeCN (20 mL). The glass tube was placed in the UV-Vis and a wavelength scan from 450 nm to 335 nm.

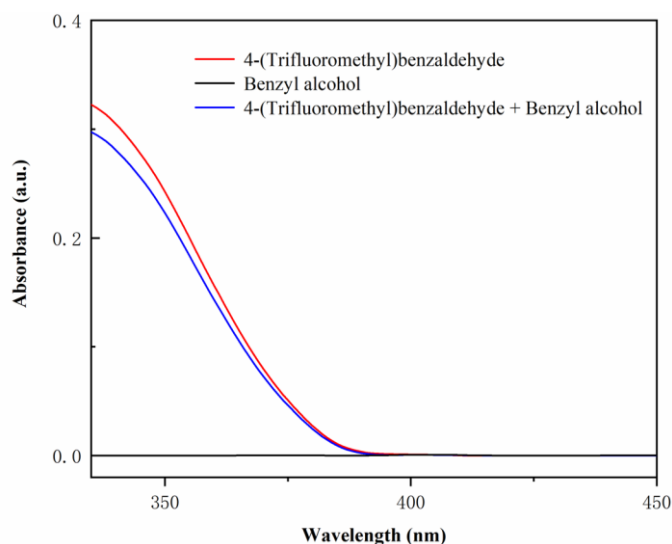

**Figure S6.** UV-vis absorption spectrum of 4-(trifluoromethyl)benzaldehyde, benzyl alcohol or its mixture in MeCN ( $10^{-2} \text{ mmol/mL}$ ).

In a glass tube, benzaldehyde (1.1 mmol, 112  $\mu\text{L}$ ), benzenamine (0.011 mmol, 2.0 mg),  $i\text{Pr}_2\text{Net}$  (0.11 mmol, 19  $\mu\text{L}$ ) or its mixture into MeCN (10 mL) and  $\text{H}_2\text{O}$  (1 mL). The glass tube was placed in the UV-Vis and a wavelength scan from 390 nm to 340



nm.

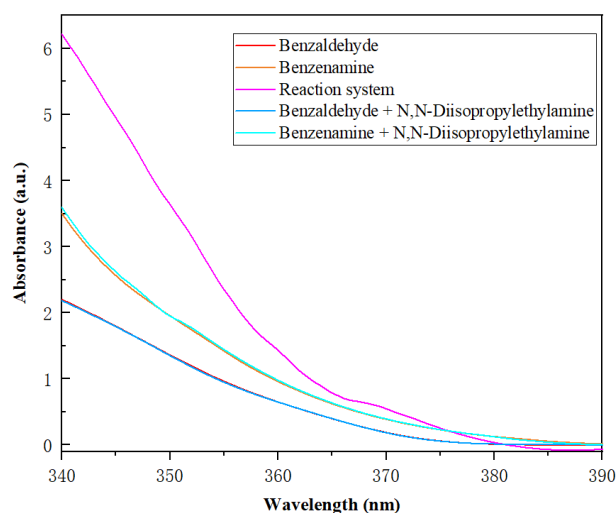

**Figure S7.** UV-vis absorption spectrum of benzaldehyde, benzenamine, reaction system or its mixture in MeCN and H<sub>2</sub>O.

## 10. Gram-scale synthesis

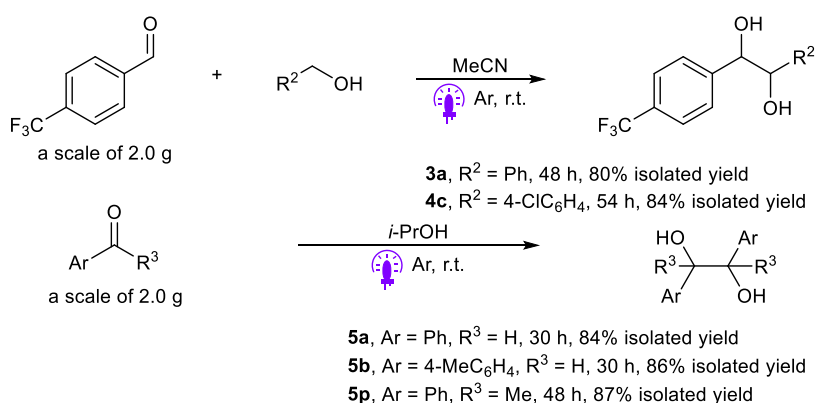

The flange was then evacuated by oil pump for 30 min before the injection of 2.0 g of substrates **1** dissolved in 20 mL solvent.<sup>[4]</sup> The mixture was stirred at room temperature under 10 W UVA LED (365–370 nm) until the reaction was completed, as monitored by TLC analysis. The reaction mixture was then concentrated in vacuum. The crude product was purified by flash column chromatography (silica gel, PE/EA) to afford the desired product.

## 11. Computational details

All the calculations were carried out with Gaussian 16 software package.<sup>5</sup> Time dependent density functional theory (TD-DFT) calculation was also performed at M06/6-311G(d,p) level of theory and the excited states were reported.<sup>6-10</sup> Geometry



optimizations of reactants, products, intermediates, and transition states were carried out at M06/6-311G(d,p) level.<sup>11</sup> The vibration frequencies of all stationary points were also calculated at the same level to prove that the optimized structure is a stable point or a transition state. The minimum-energy path (MEP) was constructed from the transition state by using the intrinsic reaction coordinate method (IRC) to prove that the optimized transition state is the desired one.<sup>10-12</sup> Route 2 and Route 3 use the solvent effect was considered by the polarization continuous model (PCM) with 2-propanol as solvent.<sup>13, 14</sup> The Minimum Energy Crossing Points (MECP) were located by KST48<sup>15, 16</sup> with Gaussian 16 software at M06/6-311G(d,p)/PCM(2-propanol) level of theory. The spin population analysis was conducted using Multiwfn 3.8 (dev)<sup>17</sup> and visualized with VMD<sup>18</sup>.

### 11.1 The spin density and the mulliken atomic spin populations

**Table S5.** The spin density and the sums of mulliken atomic spin populations, both for hydrogen atom donor and acceptor, are presented for T1, TS1-1, IM1-1 and IM1-2 (isovalue: 0.02).

| Name                                           | T1                                                                                  | TS1-1                                                                               | IM1-1                                                                                | IM1-2                                                                                 |
|------------------------------------------------|-------------------------------------------------------------------------------------|-------------------------------------------------------------------------------------|--------------------------------------------------------------------------------------|---------------------------------------------------------------------------------------|
| Spin density                                   | 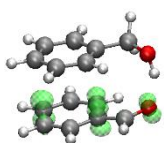 |  |  |  |
| Sum of hydrogen atom donor spin populations    | 0.233                                                                               | 0.502                                                                               | 1.000                                                                                | -                                                                                     |
| Sum of hydrogen atom acceptor spin populations | 1.813                                                                               | 1.522                                                                               | 1.004                                                                                | -                                                                                     |

The spin density in Table S5, along with the mulliken atomic spin populations analysis, indicate that under the T1 state, the unpaired electron is mainly distributed on the hydrogen atom acceptor benzaldehyde, with the spin populations of 1.813. Subsequently, as the hydrogen atom transfers towards the hydrogen atom donor via the transition state TS1-1, with the spin populations of 1.522, each of the two radicals eventually carries an unpaired electron upon the completion of hydrogen transfer (IM1-1). Therefore, this reaction process is a hydrogen atom transfer



process.

### 11.2 Kohn-Sham orbitals

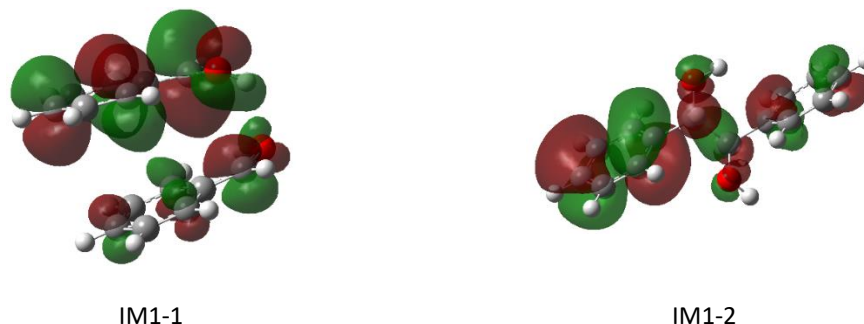

**Figure S8.** Kohn-Sham orbitals of IM1-1 and IM1-2.

### 11.3 Potential energy surface scanning

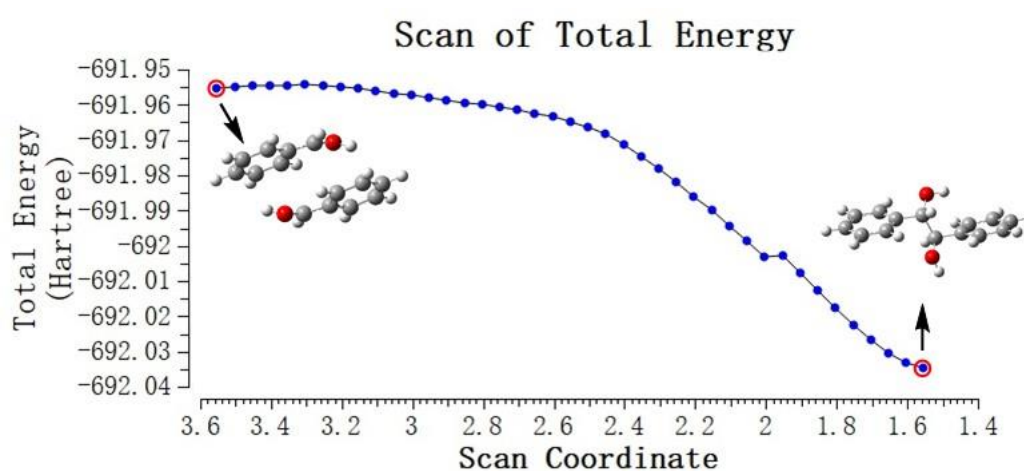

**Figure S9.** Potential energy surface scanning.

From IM1-1 to IM1-2 represents a radical cross-coupling process. To assist in locating the transition state for this process, we perform potential energy surface scanning, scanning the entire process from the radical to the target product (IM1-2). The scanning results are presented in Fig. S9. As the scanning progressed, no distinct peak emerged in the graph, suggesting that a transition state may not exist for the radical coupling process.



## 12. Comparison with previous work

|               | Reaction                                                                                                                             | Metal                       | Reductant or additives                 | E-factor                                                                                                        |
|---------------|--------------------------------------------------------------------------------------------------------------------------------------|-----------------------------|----------------------------------------|-----------------------------------------------------------------------------------------------------------------|
| Previous work | Traditional homo-coupling of aldehydes:<br>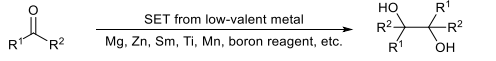         | Excessive                   | Metal reductant or boron reagent. etc. | E = 23.3<br>(R <sup>1</sup> = Ph, R <sup>2</sup> = H, <i>J. Am. Chem. Soc.</i> 2004, <b>126</b> , 13198–13199.) |
|               | Light-induced homo-coupling of aldehydes:<br>       | Metal-based Photosensitizer | Dangerous and toxic reductant          | E = 91.7<br>(R <sup>1</sup> = Ph, R <sup>2</sup> = H, <i>J. Org. Chem.</i> 2024, <b>89</b> , 11537–11541.)      |
|               | Electrochemical homo-coupling of aldehydes:<br>     | Costly electrodes           | NaN <sub>3</sub> or acids              | E = 77.9<br>(R <sup>1</sup> = 4-CNPh, R <sup>2</sup> = H, <i>J. Org. Chem.</i> 2025, <b>90</b> , 2139–2147.)    |
| This Work     | homo-coupling reactions of aldehydes/ketones:<br> | No                          | No                                     | E = 3.9<br>(R <sup>1</sup> = Ph, R <sup>2</sup> = H)                                                            |

Note: The E-factor (environmental factor) is defined as the ratio of the total mass of waste generated to the mass of the target product produced. In this calculation, solvents are accounted for with a 50% recovery rate. In this work, the E-factor was determined at gram scale as the ratio of total waste mass (g) to product mass (g), with solvent contributions corrected for 50% recovery.

**Comparison of the cross-coupling reaction between carbonyls and alcohols/imines with previous works:** As showed in the introduction section of this manuscript, the simple 1,2-addition of carbonyls using abundant non-organohalides (such as alcohols, aldehydes or imines), without the need of metal, has not been explored. Based on calculations for the gram-scale reaction involving compound **4a**, an E-factor of 3.0 was determined, accounting for a 50% solvent recovery rate.

## 13. References

- (1) W. L. F. Armarego, C. C. L. Chai, Purification of Laboratory Chemicals. Butterworth- Heinemann, 5th ed (2003).
- (2) Y. Yang, G. Li, J. Ma, C. Wang, J. Xiao, D. Xue, *Green Chem.*, 2023, **25**, 4129–4136.
- (3) Q. Shen, K. Cao, Q. Chen, X. Li, N. Zhang, Y.-B. Miao, J. Li, *Green Chem.*, 2023, **25**, 9665–9671.
- (4) M. Liu, Y. Wang, X. Kong, R. T. Rashid, S. Chu, C.-C. Li, Z. Hearne, H. Guo, Z. Mi, C.-J. Li, *Chem.*, 2019, **5**, 858–867.



- (5) M.J. Frisch, G.W. Trucks, H. B. Schlegel, G. E. Scuseria, M. A. Robb, J. R. Cheeseman, G. Scalmani, V. Barone, G. A. Petersson, H. Nakatsuji, X. Li, M. Caricato, A.V. Marenich, J. Bloino, B. G. Janesko, R. Gomperts, B. Mennucci, H. P. Hratchian, J. V. Ortiz, A. F. Izmaylov, J. L. Sonnenberg, D. Williams-Young, F. Ding, F. Lipparini, F. Egidi, J. Goings, B. Peng, A. Petrone, T. Henderson, D. Ranasinghe, V. G. Zakrzewski, J. Gao, N. Rega, G. Zheng, W. Liang, M. Hada, M. Ehara, K. Toyota, R. Fukuda, J. Hasegawa, M. Ishida, T. Nakajima, Y. Honda, O. Kitao, H. Nakai, T. Vreven, K. Throssell, Jr. J. A. Montgomery, J. E. Peralta, F. Ogliaro, M. J. Bearpark, J. J. Heyd, E. N. Brothers, K. N. Kudin, V. N. Staroverov, T. A. Keith, R. Kobayashi, J. Normand, K. Raghavachari, A. P. Rendell, J. C. Burant, S. S. Iyengar, J. Tomasi, M. Cossi, J. M. Millam, M. Klene, C. Adamo, R. Cammi, J. W. Ochterski, R. L. Martin, K. Morokuma, O. Farkas, J. B. Foresman, D. J. Fox, Gaussian 16, Revision A.03, Gaussian, Inc., Wallingford CT, 2016.
- (6) C. Adamo, D. Jacquemin, *Chem. Soc. Rev.*, 2013, **42**, 845-856.
- (7) C. Lee, W. Yang, R. G. Parr, *Phys. Rev. B*, 1988, **37**, 785.
- (8) V. A. Rassolov, M. A. Ratner, J. A. Pople, P. C. Redfern, L. A. J. *Comp. Chem.*, 2001, **22**, 976-984.
- (9) Y. Zhao, D. G. Truhlar, *Chem. Acc.*, 2008, **120**, 215-241.
- (10) K. Fukui, *Acc. Chem. Res.*, 1981, **14**, 363-368.
- (11) C. Gonzalez, B. H. Schlegel, *J. Chem. Phys.*, 1989, **90**, 2154-2161.
- (12) K. Fukui, *J. Phys. Chem.*, 1970, **74**, 4161-4163.
- (13) S. Miertuš, E. Scrocco, J. Tomasi, *Chem. Phys.*, 1981, **55**, 117-129.
- (14) S. Miertuš, J. Tomasi, *Chem. Phys.*, 1982, **65**, 239-245.
- (15) Y. Ma, A. A. Hussein, *ChemistrySelect*, 2022, **7**, e202202354.
- (16) Y. Ma, KST48: A Powerful Tool for MECP locating. <https://github.com/RimoAccelerator/KST48>.
- (17) T. Lu, F. Chen, *J. Comput. Chem.*, 2012, **33**, 580-592.
- (18) W. Humphrey, A. Dalke, K. Schulten, *J. Molec. Graphics*, 1996, **14**, 33-38.
- (19) A. Caron, É. Morin, S. K. Collins, *ACS Catal.*, 2019, **9**, 9458-9464.
- (20) X. Huang, N. Li, Z. Geng, F. Pan, X. Wang, *Chin. J. Chem.*, 2012, **30**, 2657-2663.
- (21) S. Guo, Y. Jiang, J. Yang, G. Lu, M. Liu, W. Liu, H. Cai, *J. Org. Chem.*, 2025, **90**, 2139-2147.
- (22) J. Wang, N. B. Üner, S. E. Dubowsky, M. P. Confer, R. Bhargava, Y. Sun, Y. Zhou, R. M. Sankaran, J. S. Moore, *J. Am. Chem. Soc.*, 2023, **145**, 10470-10474.
- (23) C. Liu, R. Li, W. Zhou, Y. Liang, Y. Shi, R.-L. Li, Y. Ling, Y. Yu, J. Li, B. Zhang, *ACS Catal.*, 2021, **11**, 8958-8967.
- (24) T. Liu, W. Meng, X. Feng, H. Du, *Angew. Chem. Int. Ed.*, 2024, **63**, e202313957.
- (25) J.-Y. Li, M.-Y. Qi, Y.-J. Xu, *Chin. J. Catal.* 2022, **43**, 1084-1091.
- (26) H. Zhang, D. Feng, H. Sheng, X. Ma, J. Wan, Q. Tang, *RSC Adv.*, 2014, **4**, 6417-6423.
- (27) B. M. Kim, H. Kim, W. Kim, K. Y. Im, J. K. Park, *J. Org. Chem.*, 2004, **69**, 5104-5107.
- (28) M. Takeda, A. Mitsui, K. Nagao, H. Ohmiya, *J. Am. Chem. Soc.* 2019, **141**, 3664-3669.



## 14. Copies of NMR spectra for the products

$^1\text{H}$  NMR spectrum of compound **2a** (400 MHz) in  $\text{CDCl}_3$

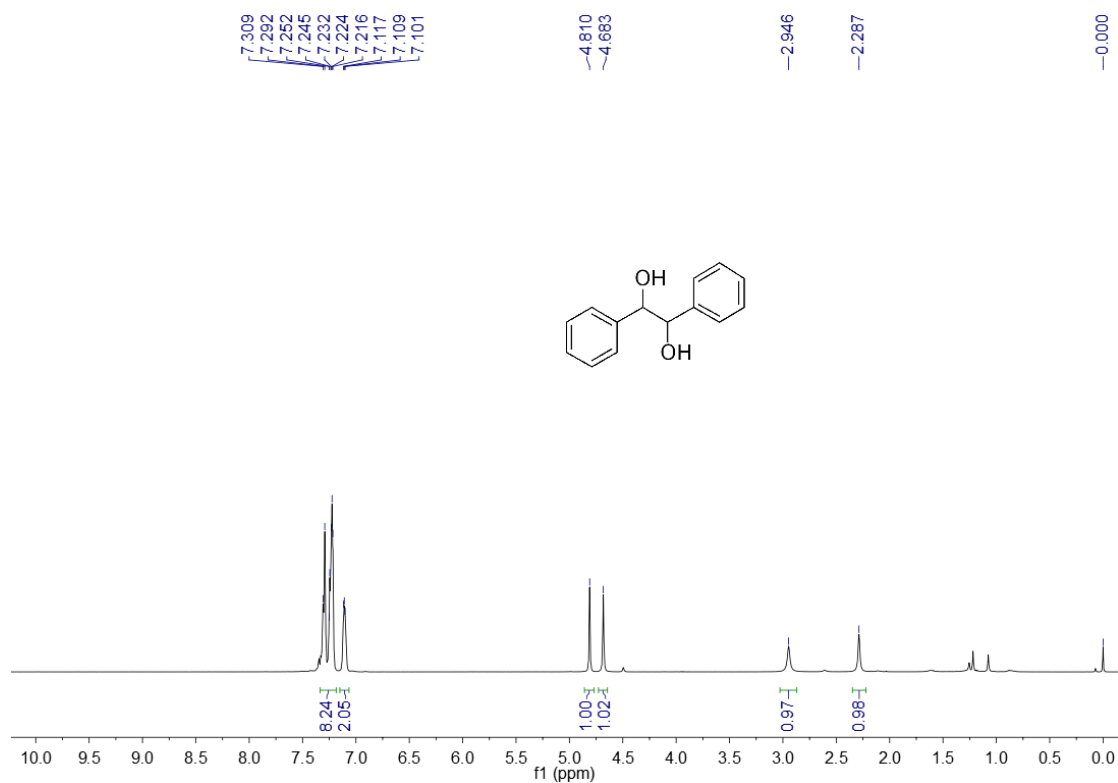

$^{13}\text{C}$  NMR spectrum of compound **2a** (100 MHz) in  $\text{CDCl}_3$

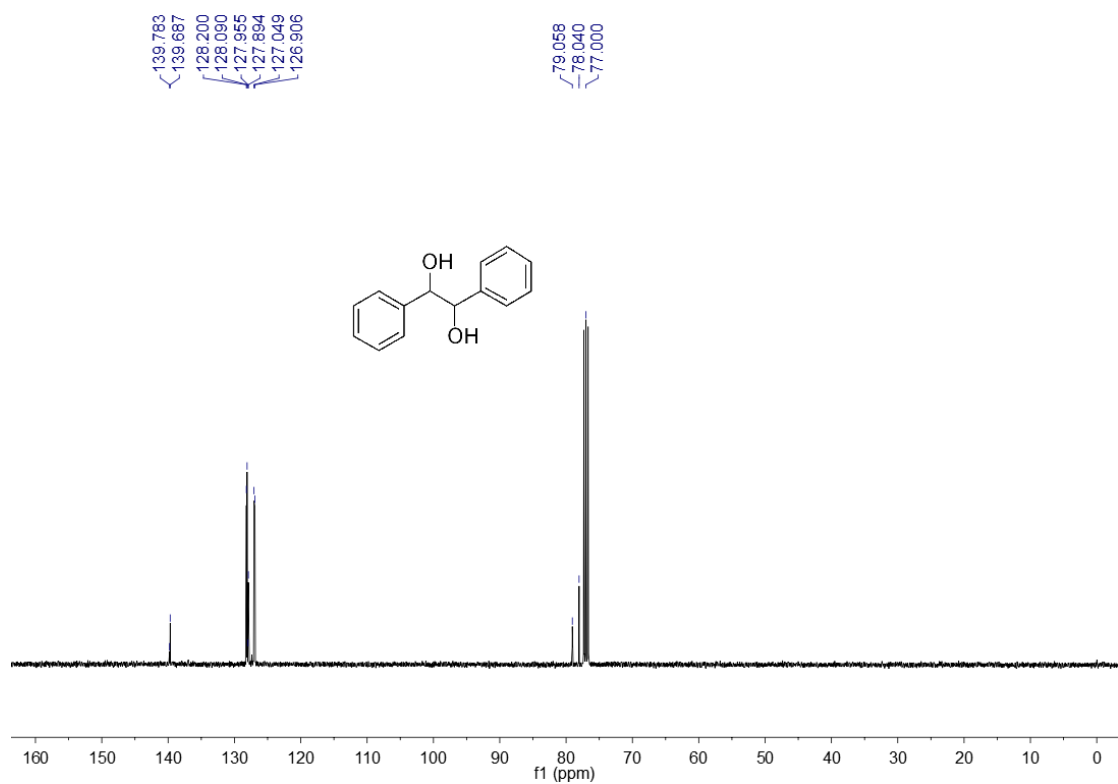



$^1\text{H}$  NMR spectrum of compound **2b** (400 MHz) in  $\text{CDCl}_3$

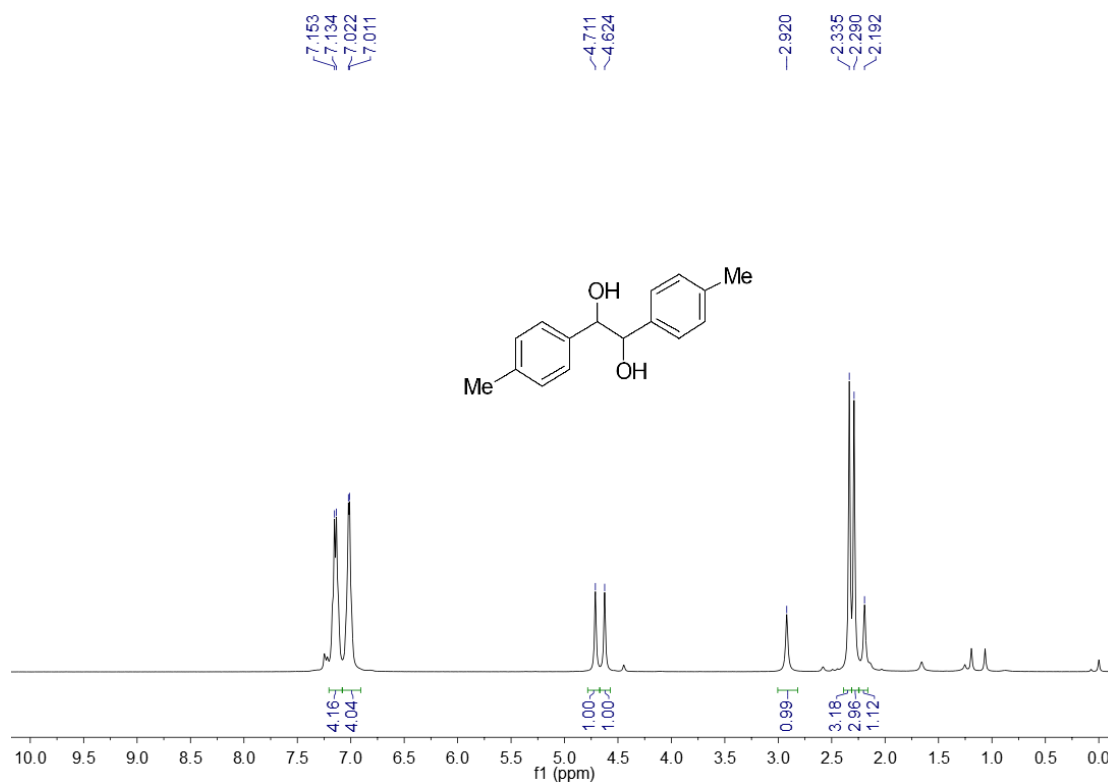

$^{13}\text{C}$  NMR spectrum of compound **2b** (100 MHz) in  $\text{CDCl}_3$

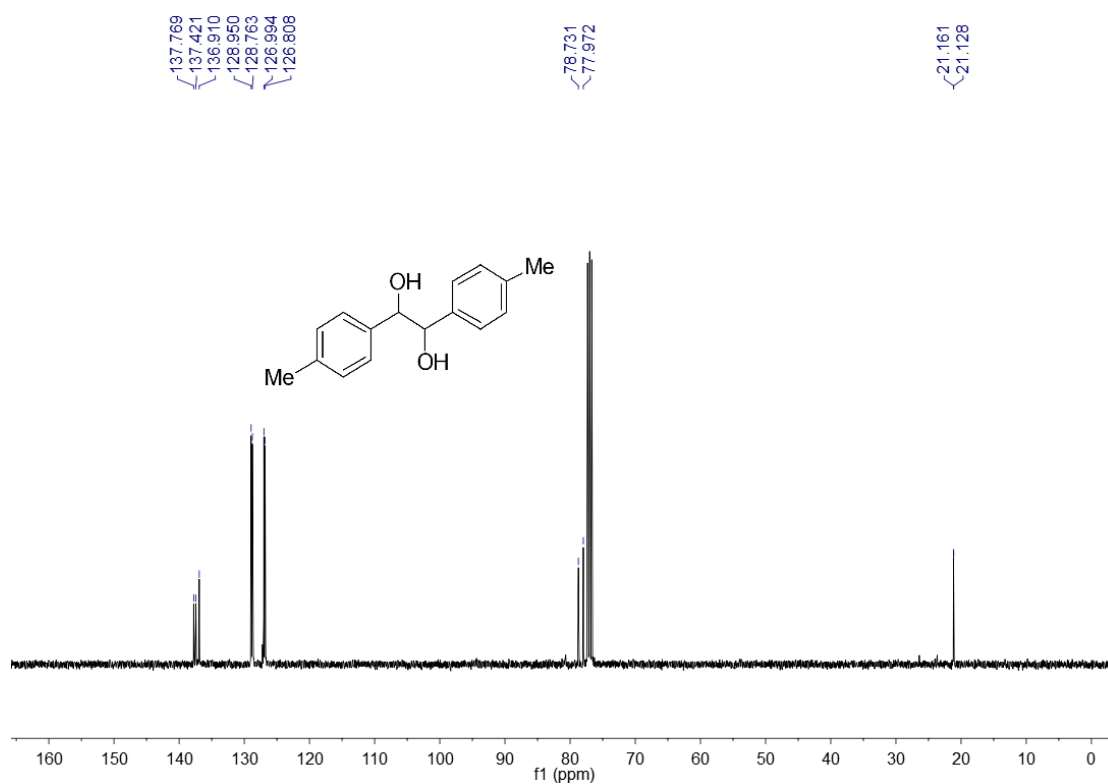



$^1\text{H}$  NMR spectrum of compound **2c** (400 MHz) in  $\text{CDCl}_3$

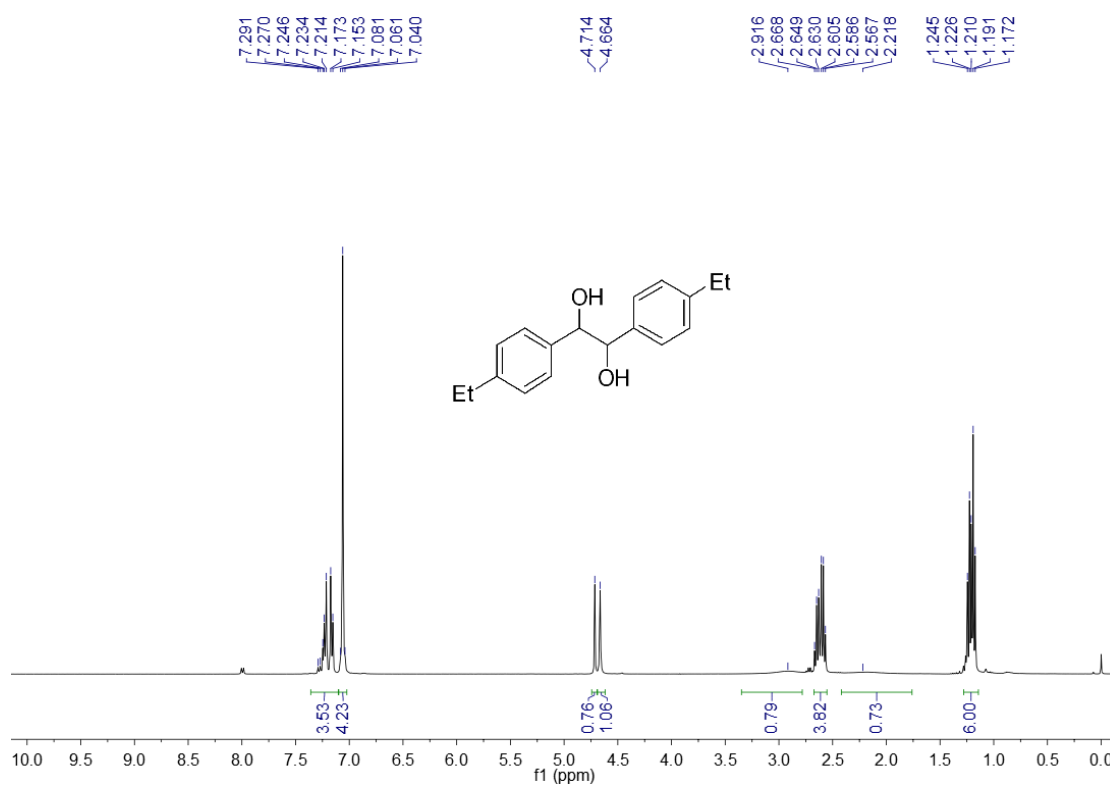

$^{13}\text{C}$  NMR spectrum of compound **2c** (100 MHz) in  $\text{CDCl}_3$

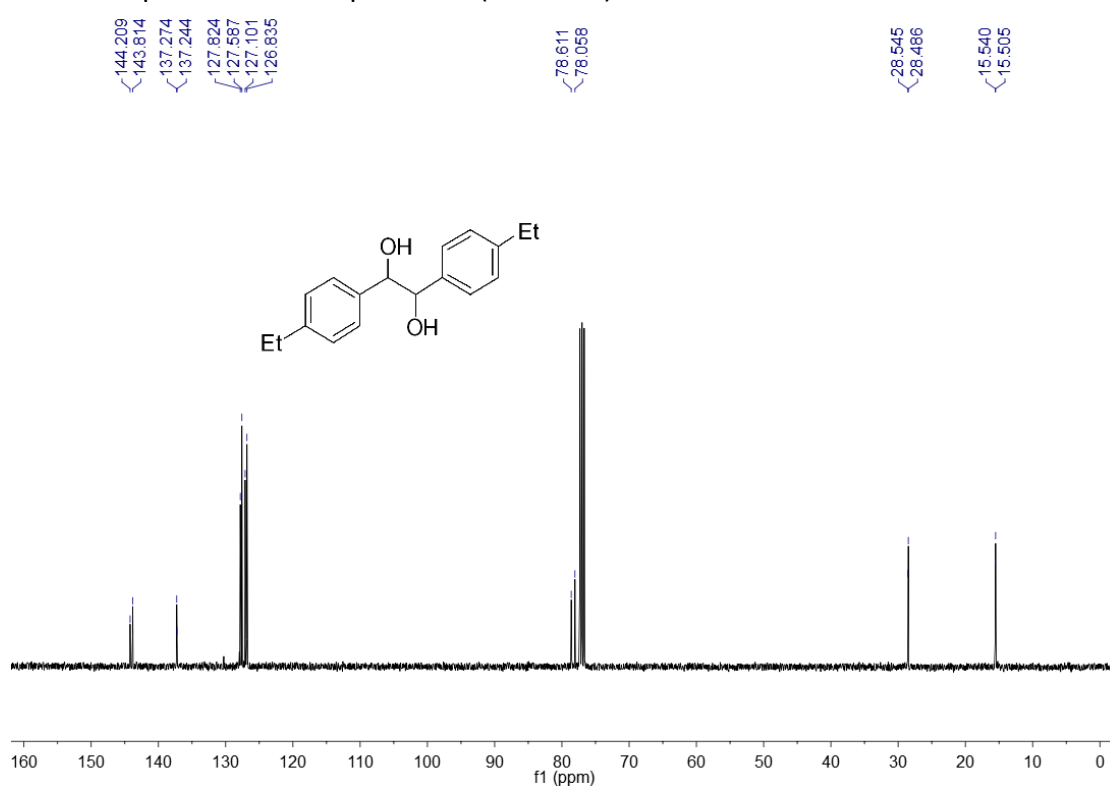



$^1\text{H}$  NMR spectrum of compound **2d** (400 MHz) in  $\text{CDCl}_3$

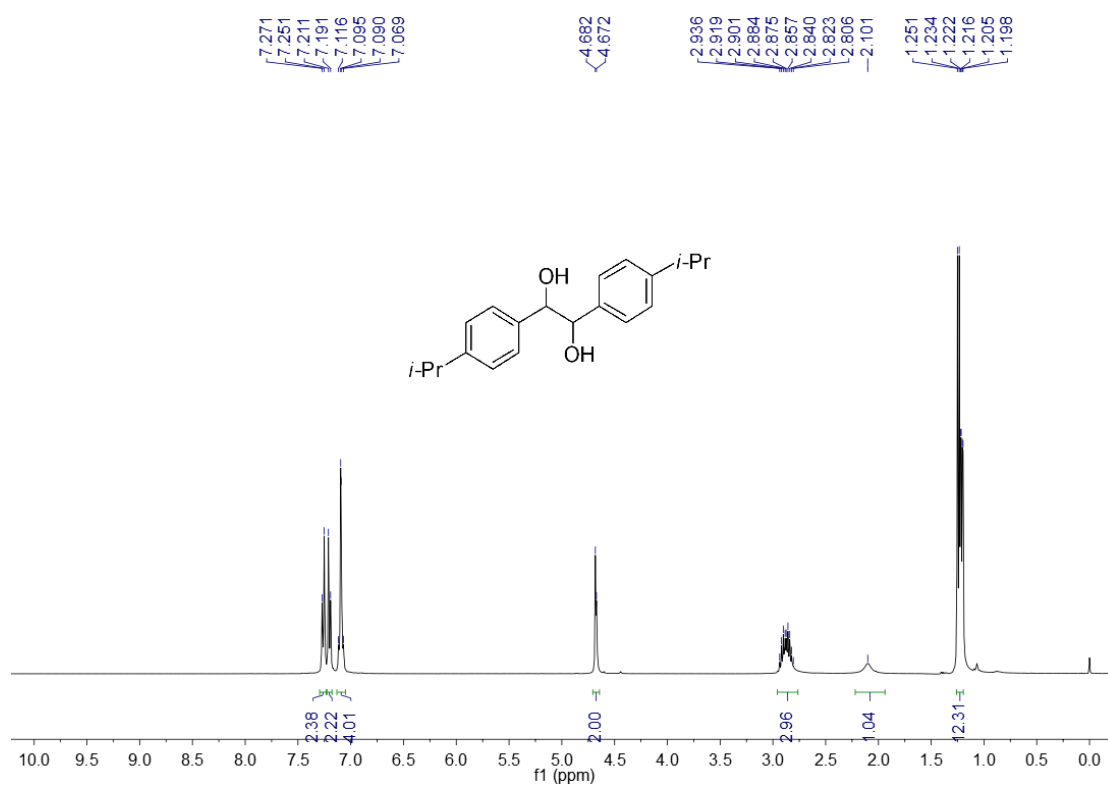

$^{13}\text{C}$  NMR spectrum of compound **2d** (100 MHz) in  $\text{CDCl}_3$

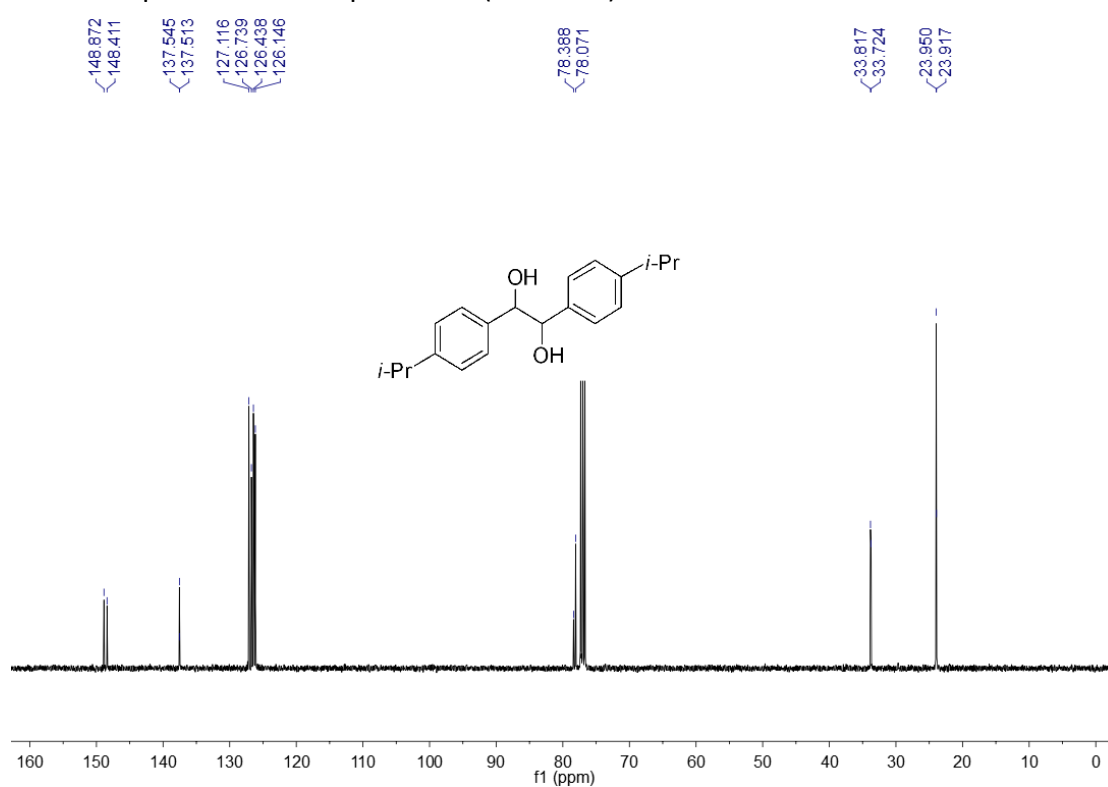



$^1\text{H}$  NMR spectrum of compound **2e** (400 MHz) in  $\text{CDCl}_3$

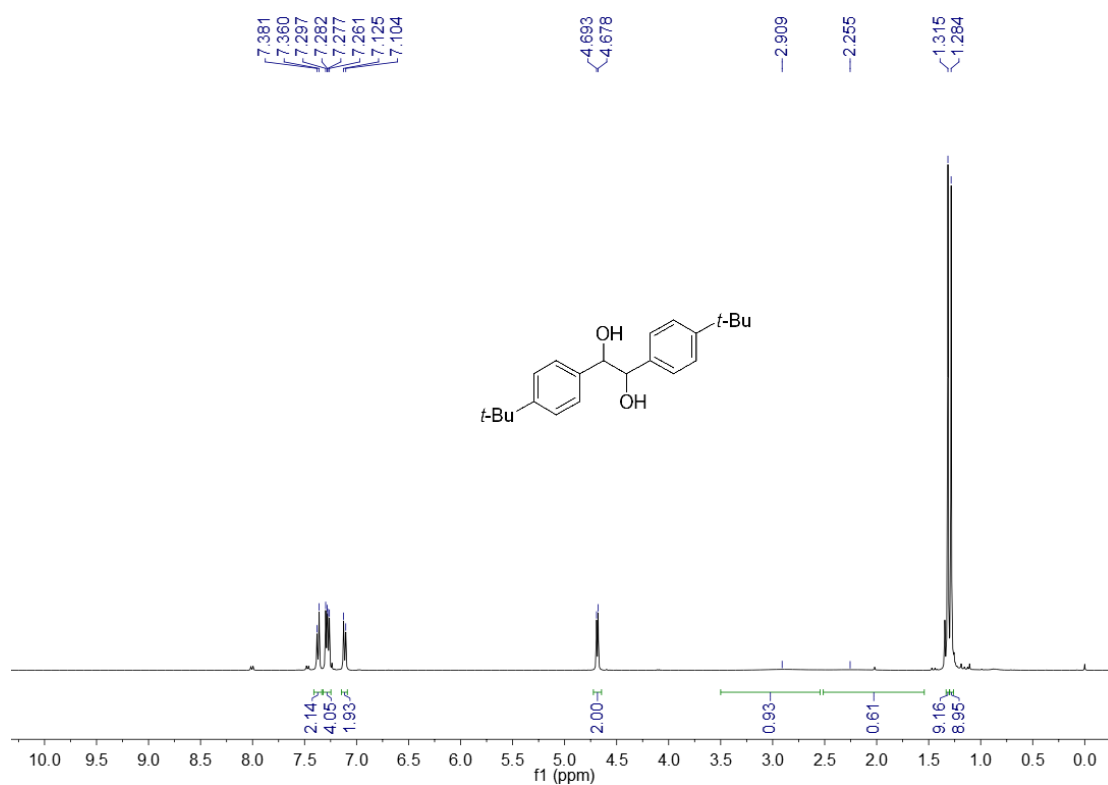

$^{13}\text{C}$  NMR spectrum of compound **2e** (100 MHz) in  $\text{CDCl}_3$

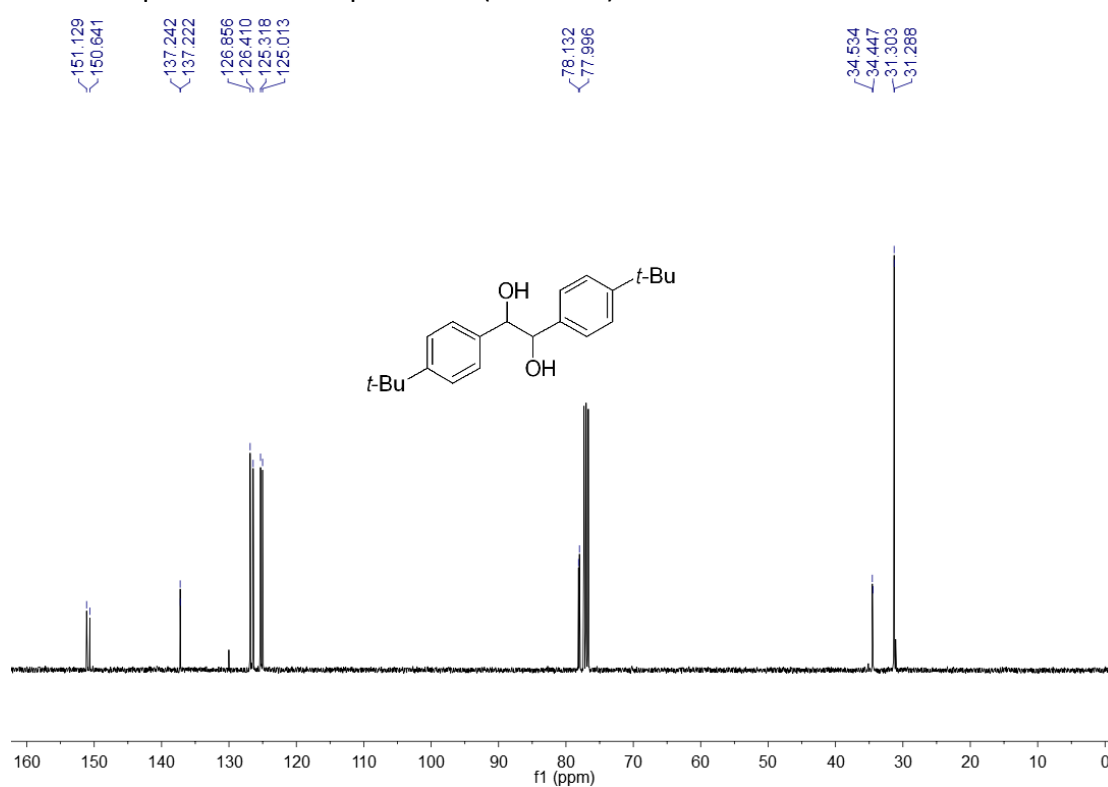



$^1\text{H}$  NMR spectrum of compound **2f** (400 MHz) in  $\text{CDCl}_3$

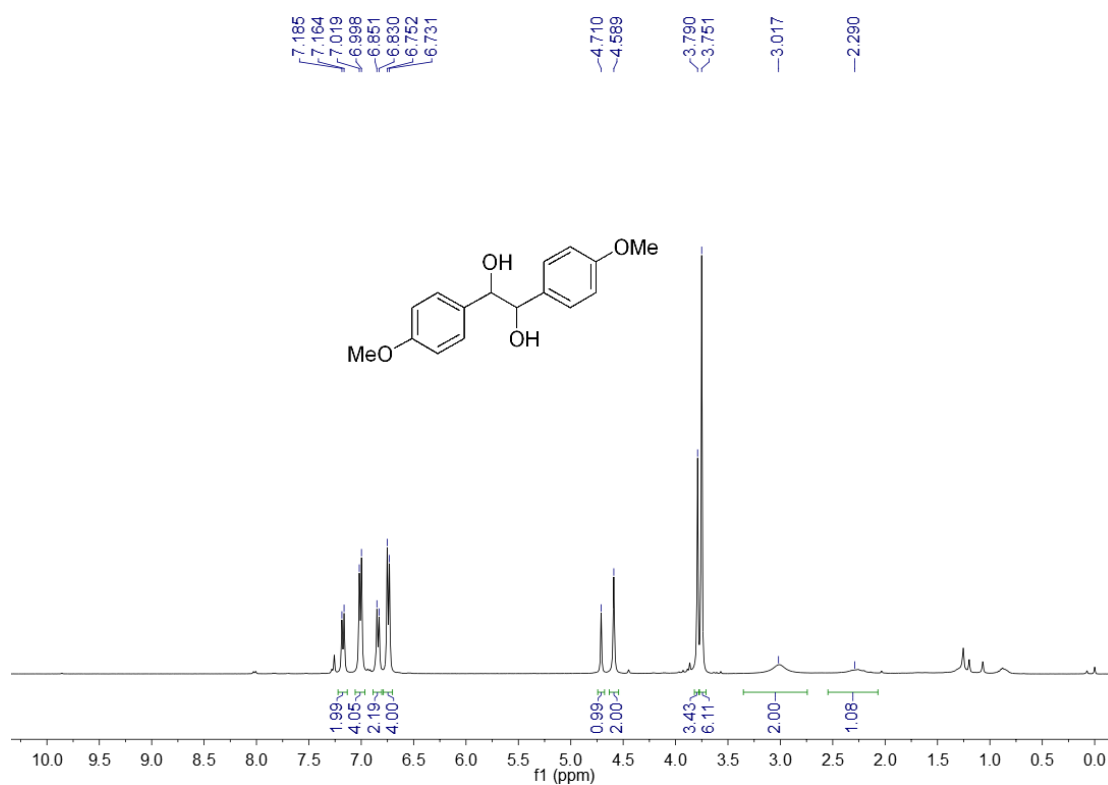

$^{13}\text{C}$  NMR spectrum of compound **2f** (100 MHz) in  $\text{CDCl}_3$

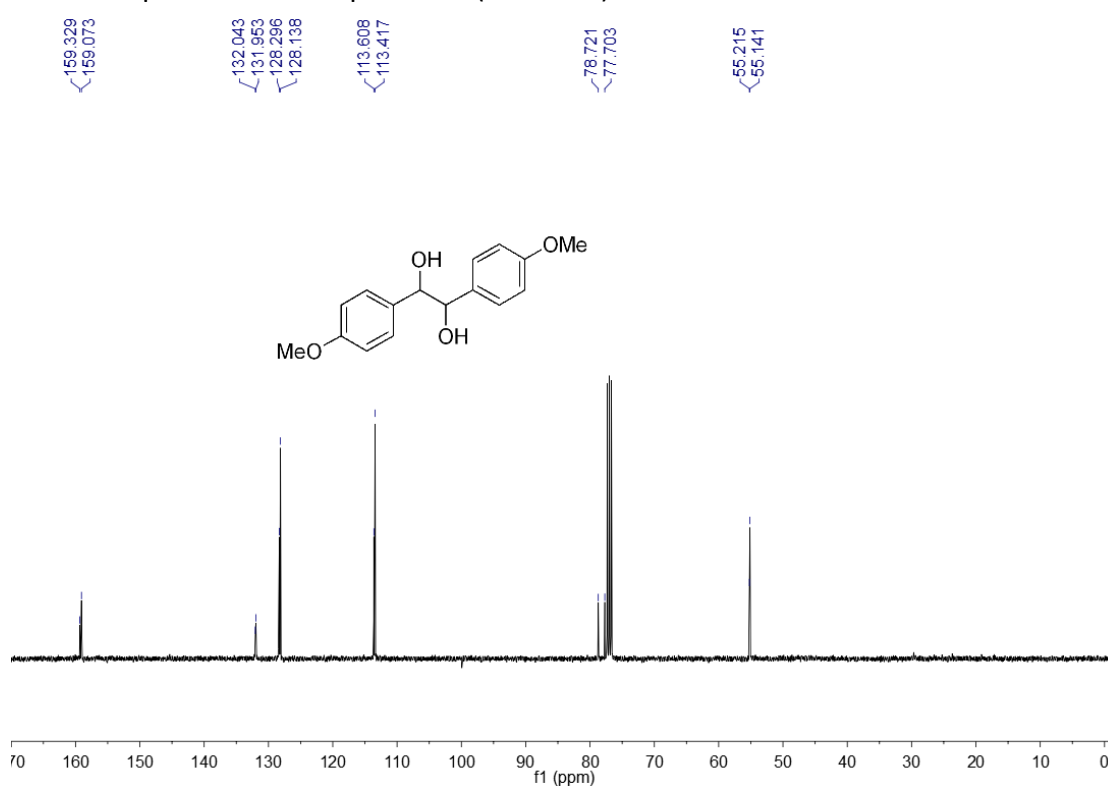



$^1\text{H}$  NMR spectrum of compound **2g** (400 MHz) in  $\text{CDCl}_3$

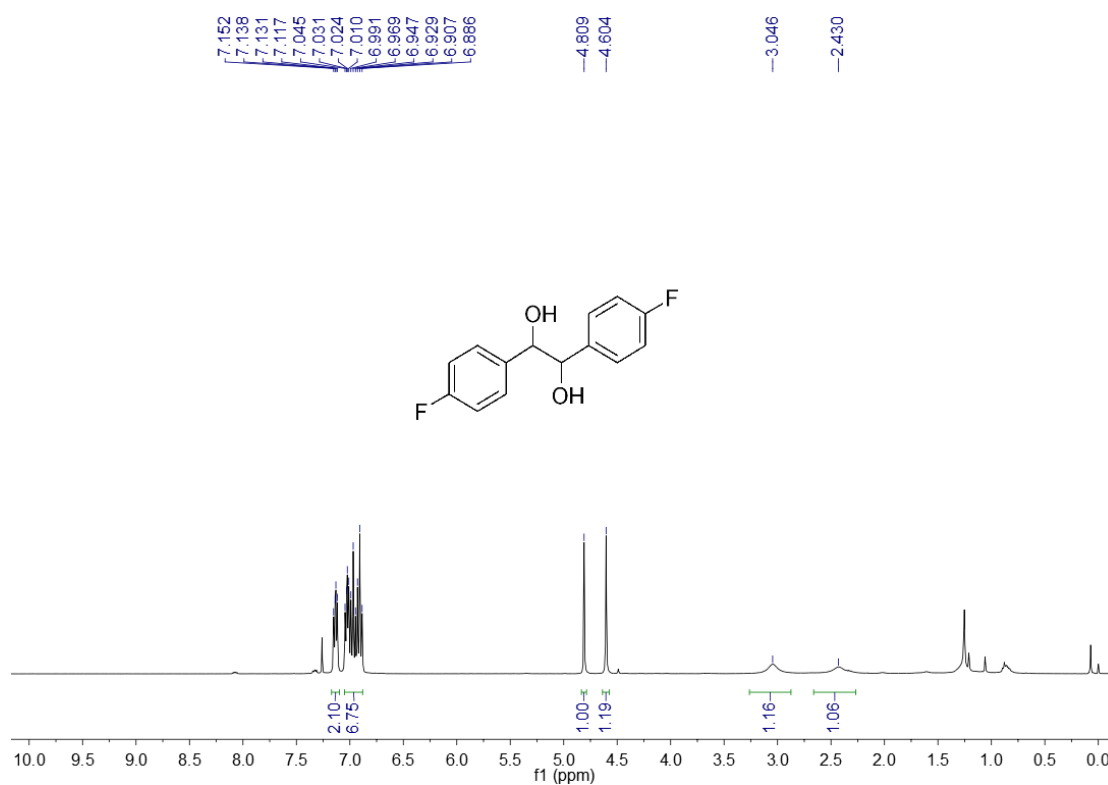

$^{13}\text{C}$  NMR spectrum of compound **2g** (100 MHz) in  $\text{CDCl}_3$

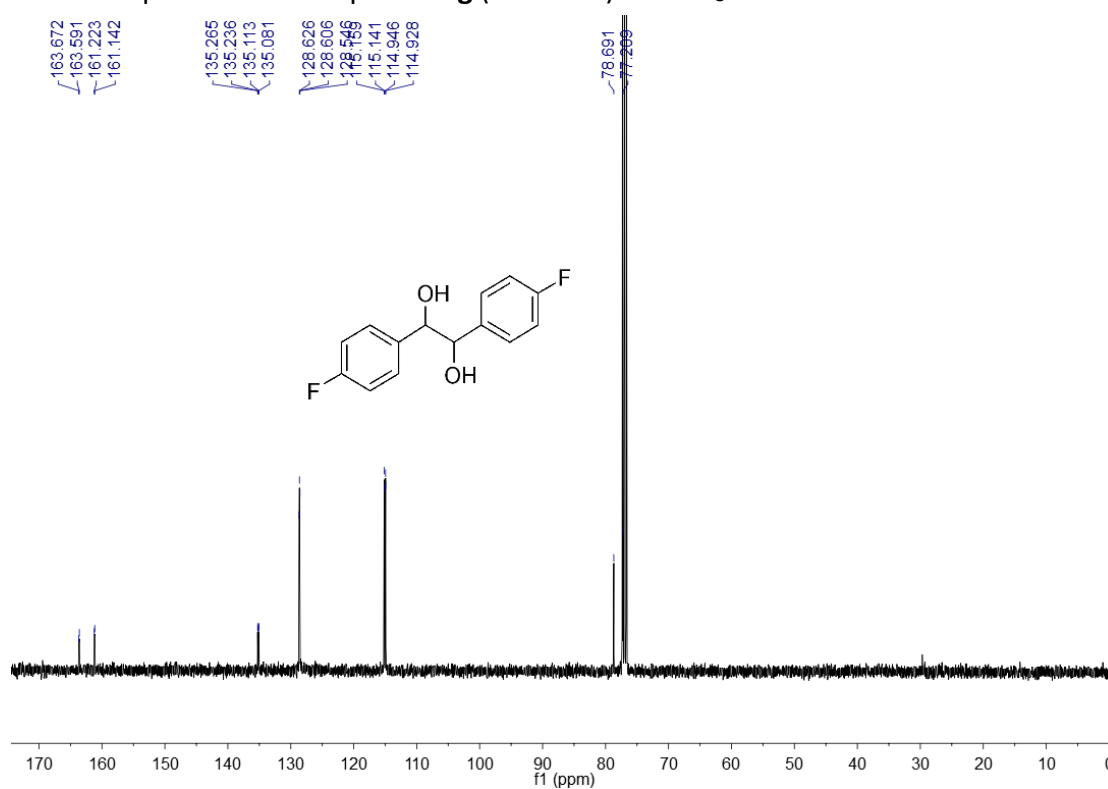



$^{19}\text{F}$  NMR spectrum of compound **2g** (376 MHz) in  $\text{CDCl}_3$

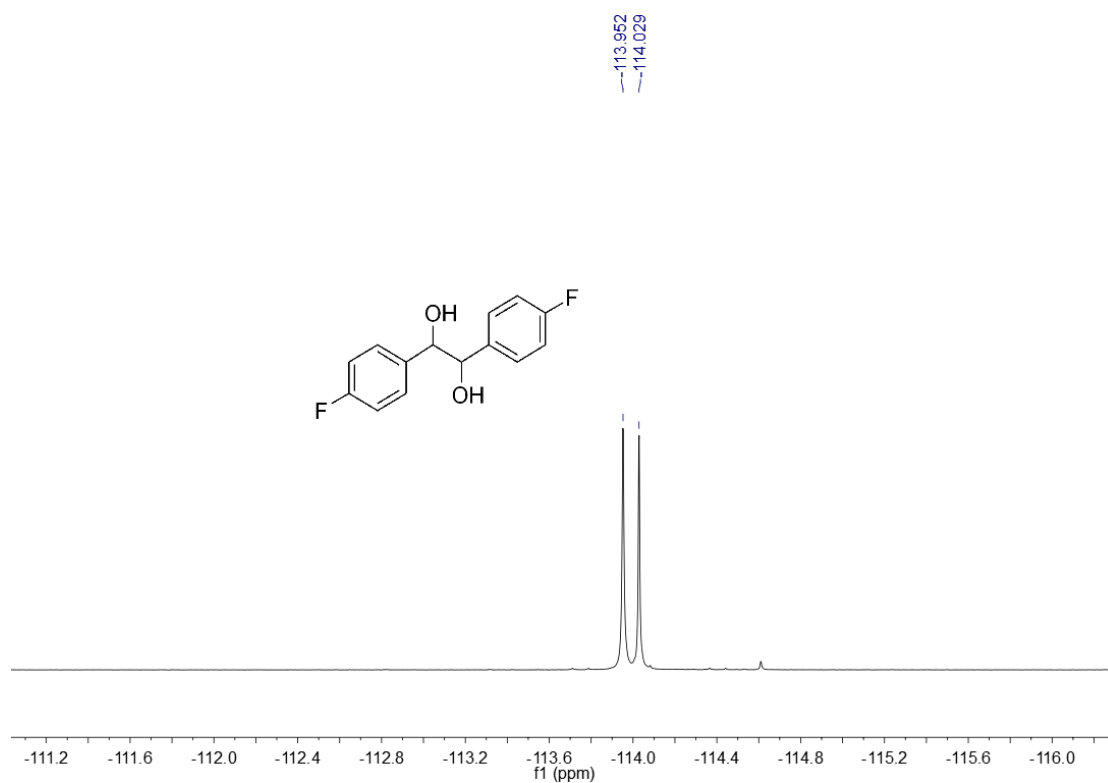

$^1\text{H}$  NMR spectrum of compound **2h** (400 MHz) in  $\text{CDCl}_3$

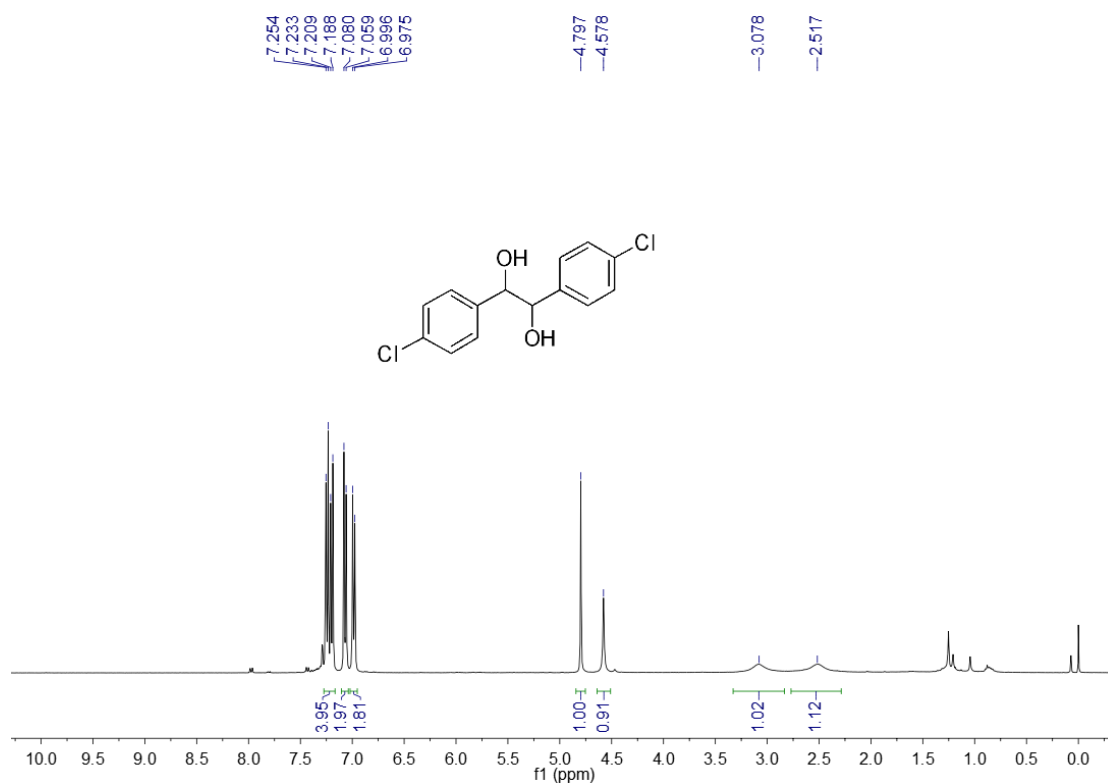



$^{13}\text{C}$  NMR spectrum of compound **2h** (100 MHz) in  $\text{CDCl}_3$

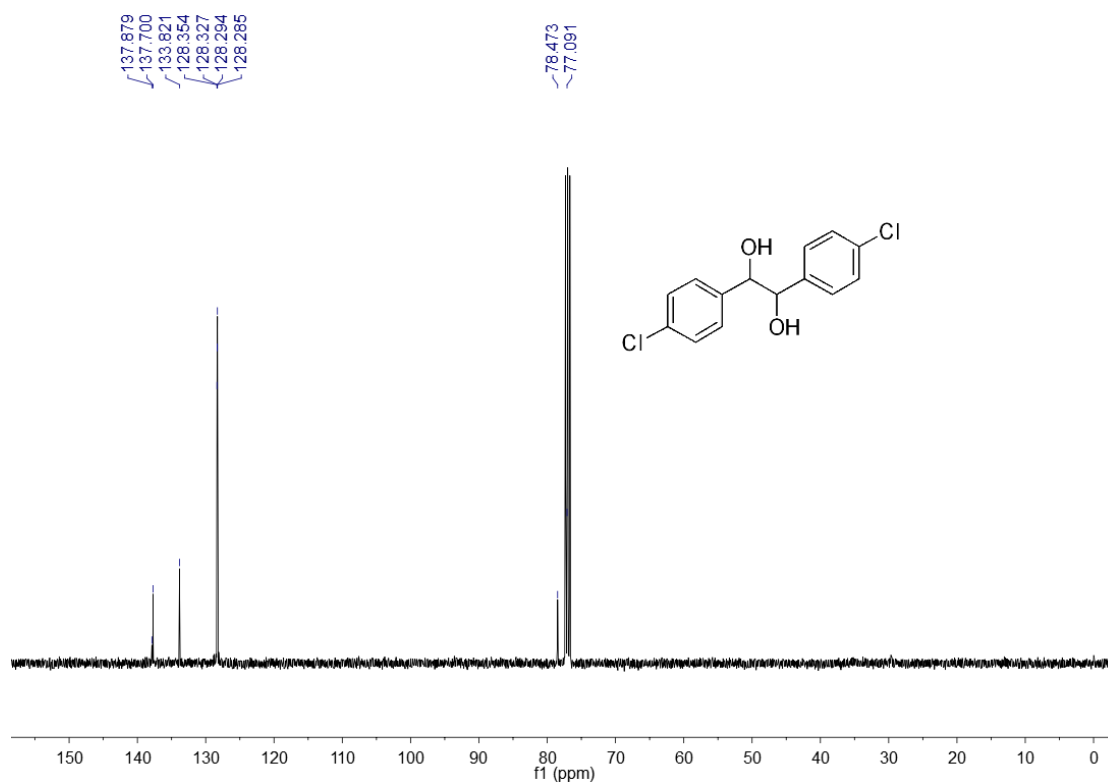

$^1\text{H}$  NMR spectrum of compound **2i** (400 MHz) in  $\text{CDCl}_3$

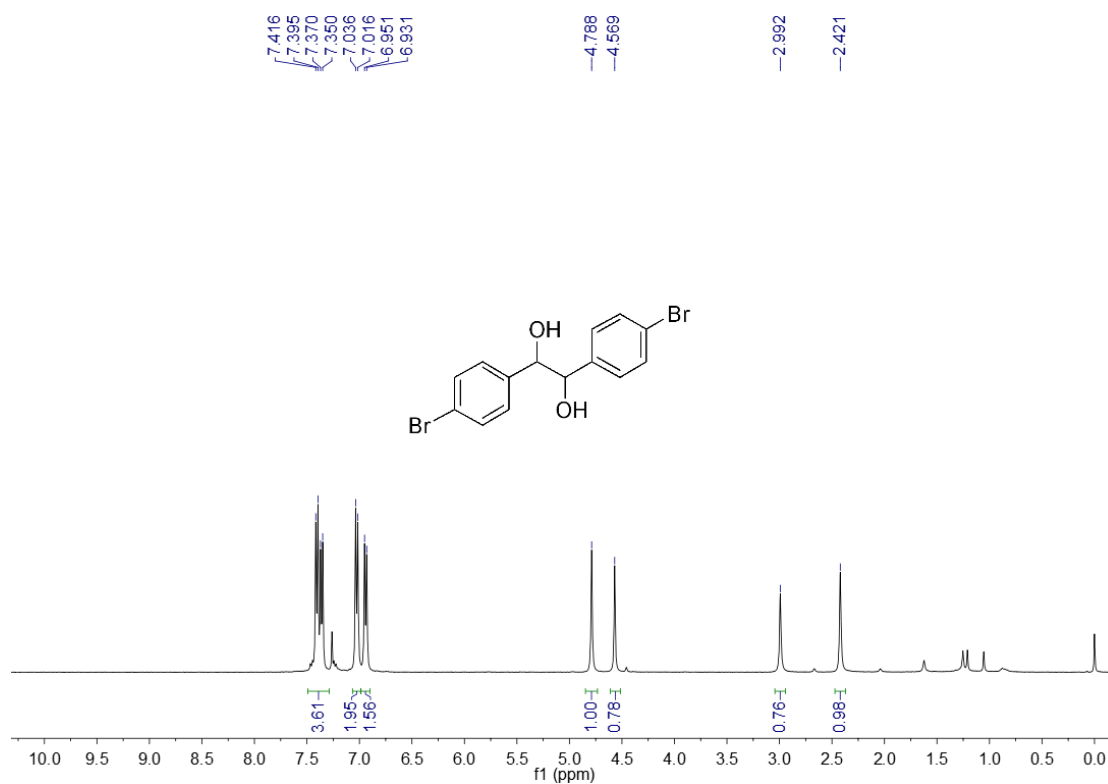



$^{13}\text{C}$  NMR spectrum of compound **2i** (100 MHz) in  $\text{CDCl}_3$

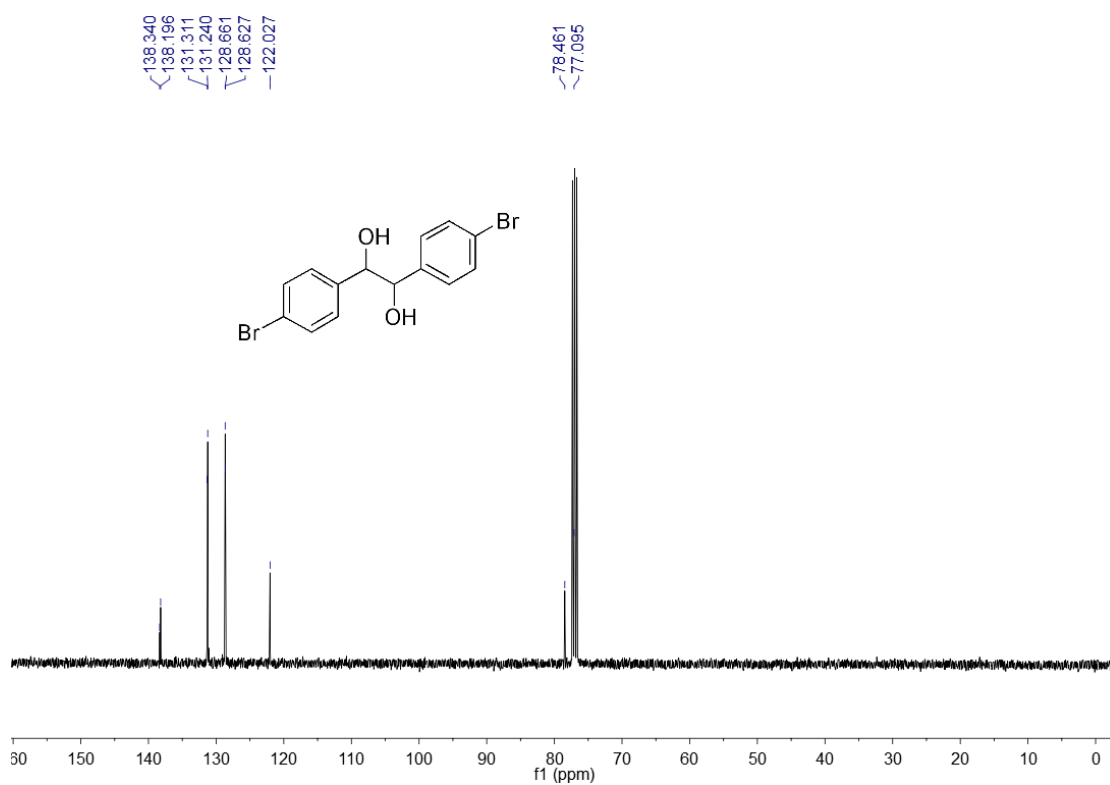

$^1\text{H}$  NMR spectrum of compound **2j** (400 MHz) in  $\text{CDCl}_3$

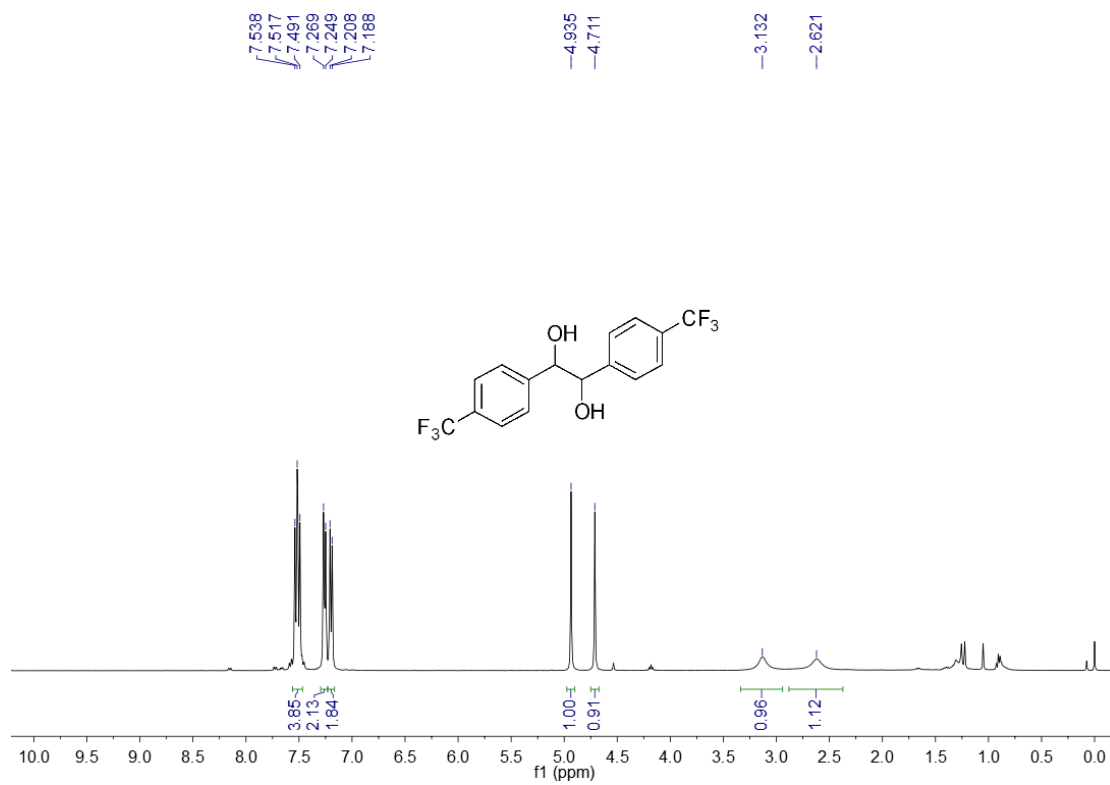



$^{13}\text{C}$  NMR spectrum of compound **2j** (100 MHz) in  $\text{CDCl}_3$

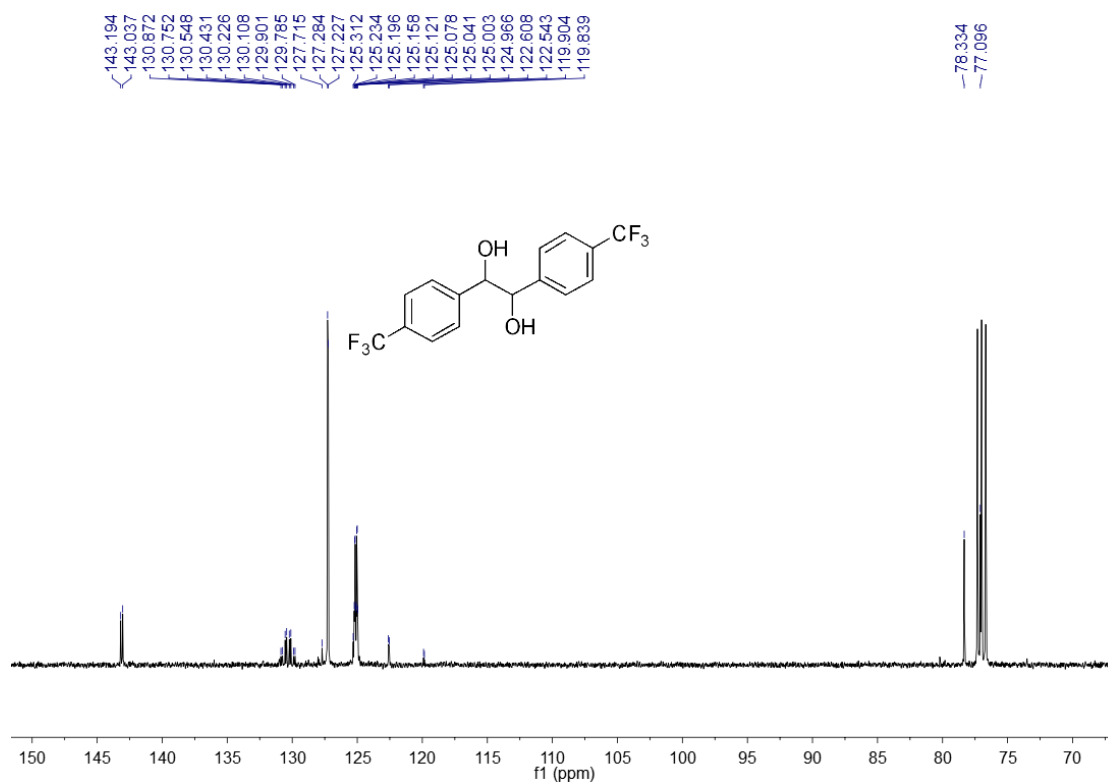

$^{19}\text{F}$  NMR spectrum of compound **2j** (100 MHz) in  $\text{CDCl}_3$

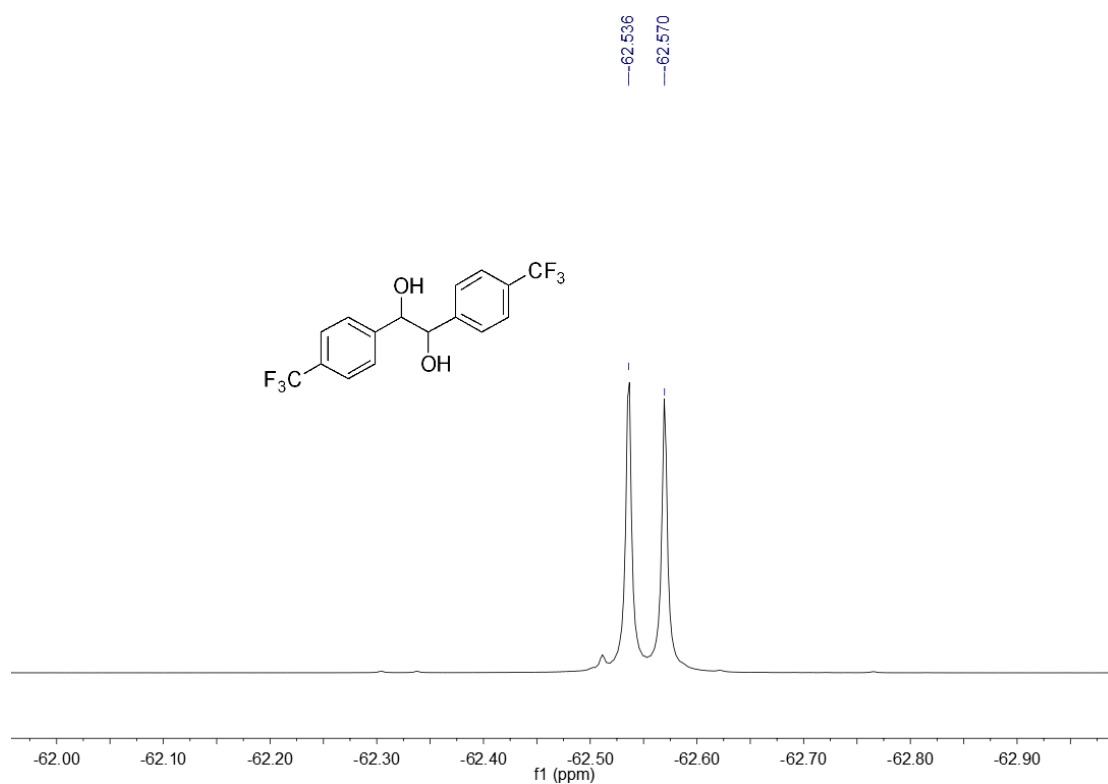



$^1\text{H}$  NMR spectrum of compound **2k** (400 MHz) in  $\text{CDCl}_3$

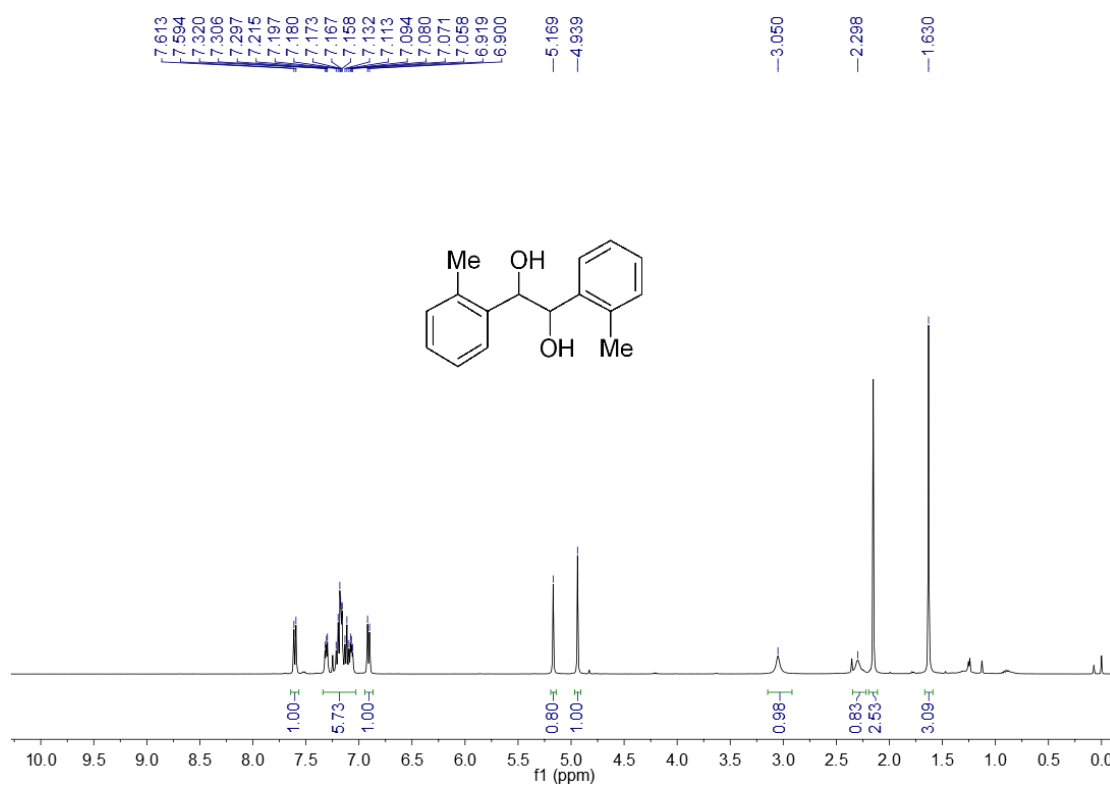

$^{13}\text{C}$  NMR spectrum of compound **2k** (100 MHz) in  $\text{CDCl}_3$

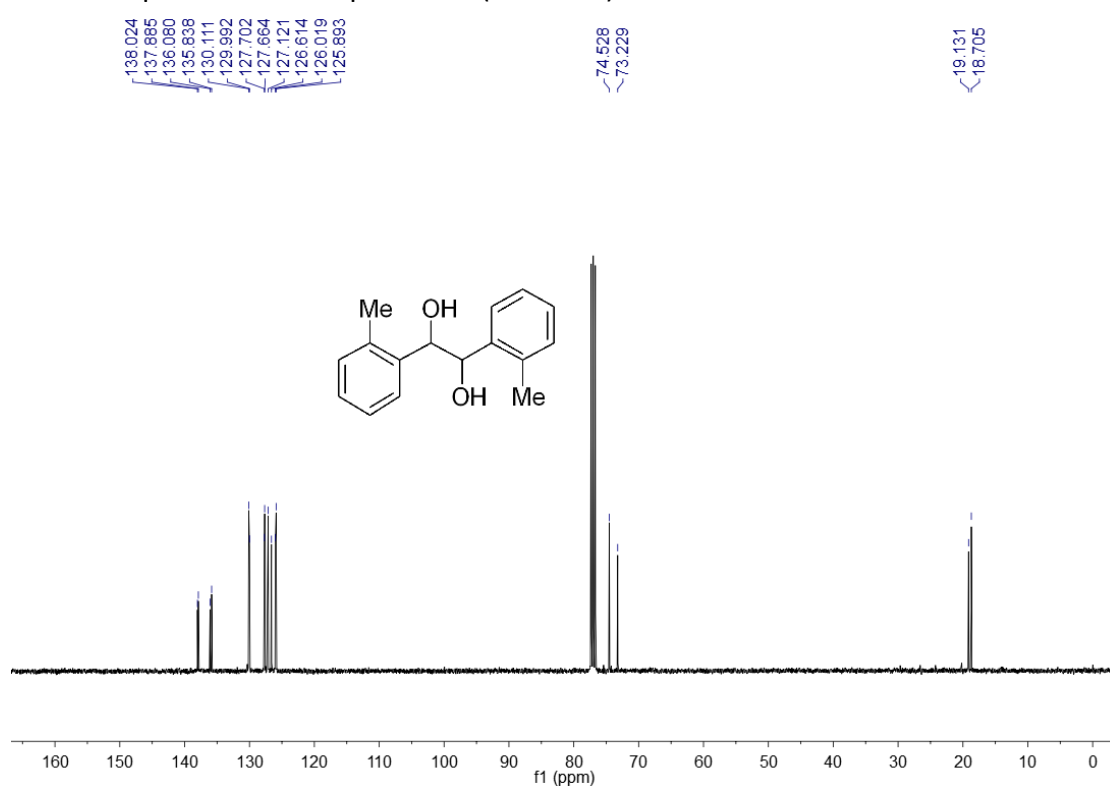



$^1\text{H}$  NMR spectrum of compound **2l** (400 MHz) in  $\text{CDCl}_3$

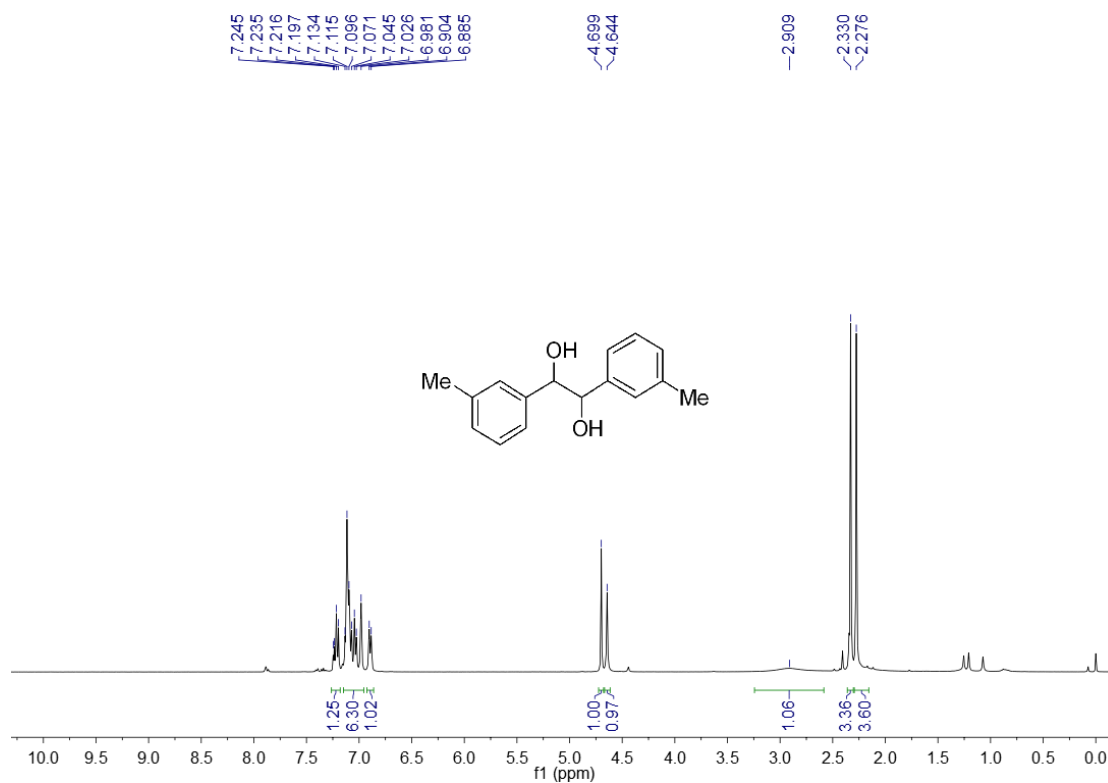

$^{13}\text{C}$  NMR spectrum of compound **2l** (100 MHz) in  $\text{CDCl}_3$

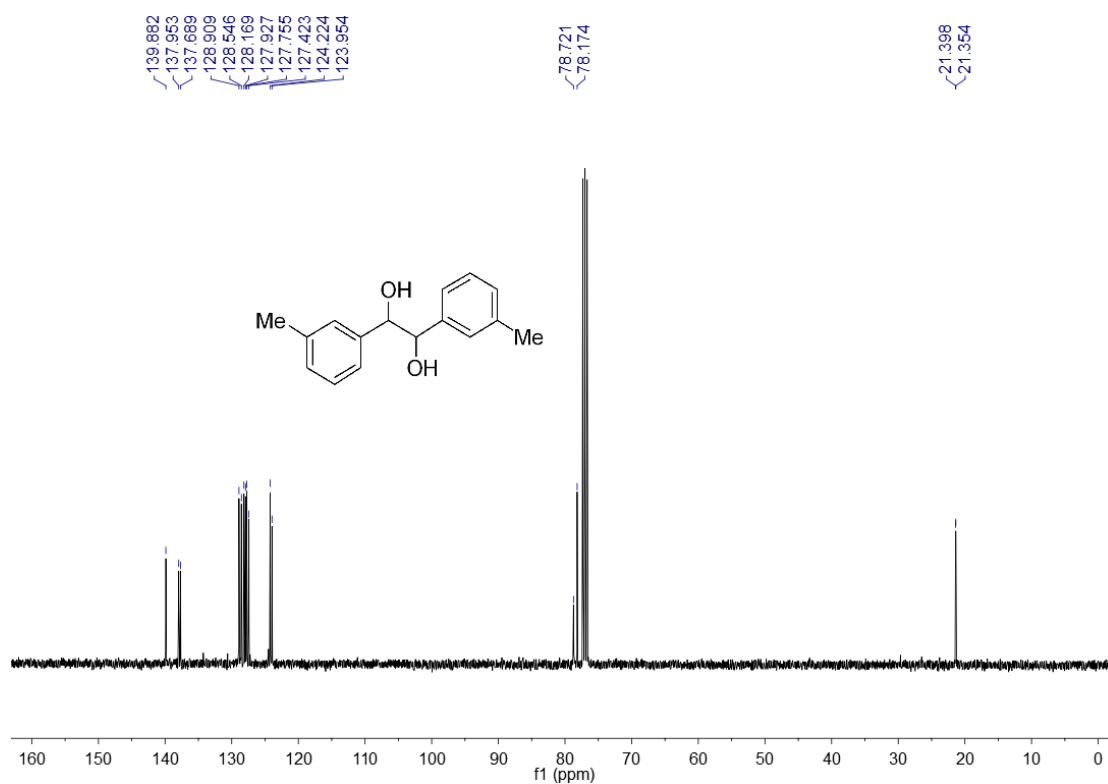



$^1\text{H}$  NMR spectrum of compound **2m** (400 MHz) in  $\text{CDCl}_3$

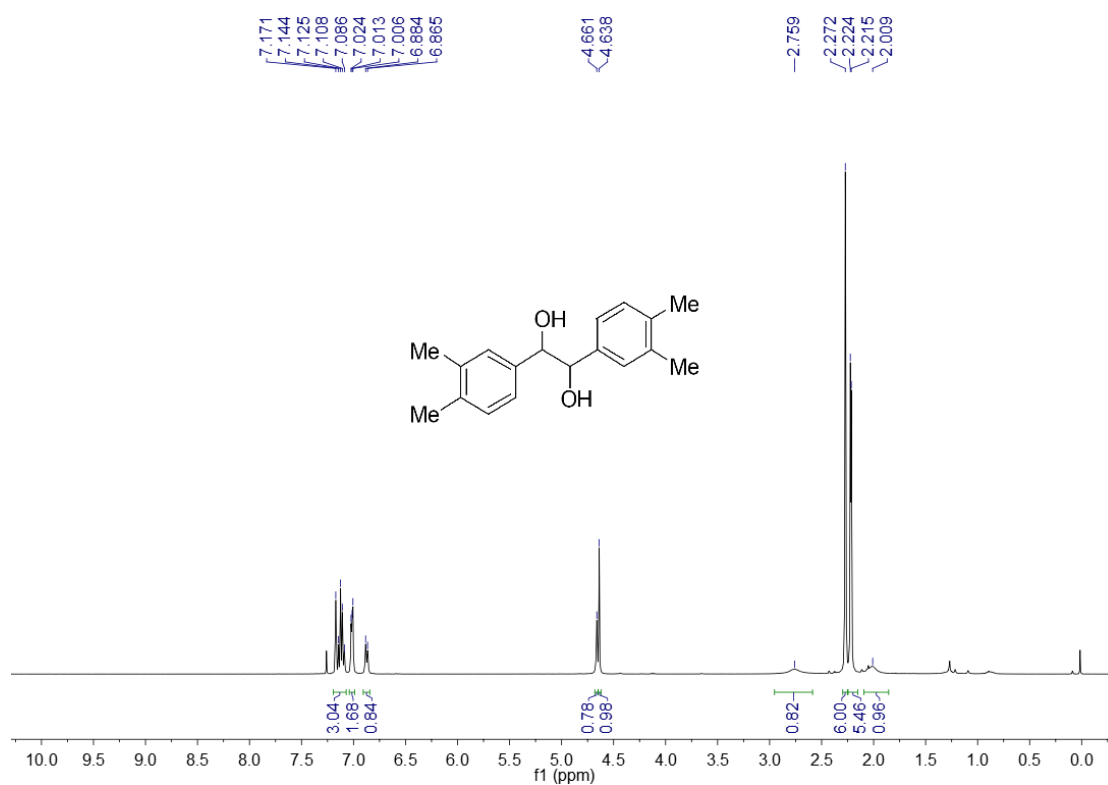

$^{13}\text{C}$  NMR spectrum of compound **2m** (100 MHz) in  $\text{CDCl}_3$

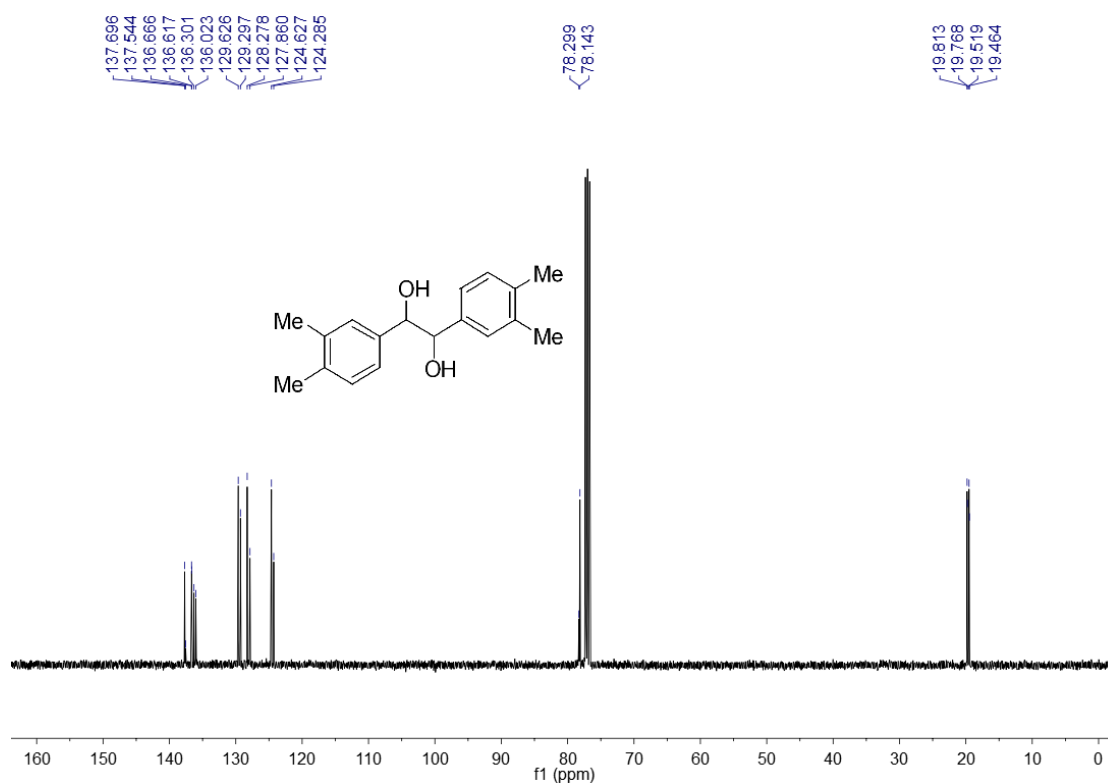



$^1\text{H}$  NMR spectrum of compound **2n** (400 MHz) in  $\text{CDCl}_3$

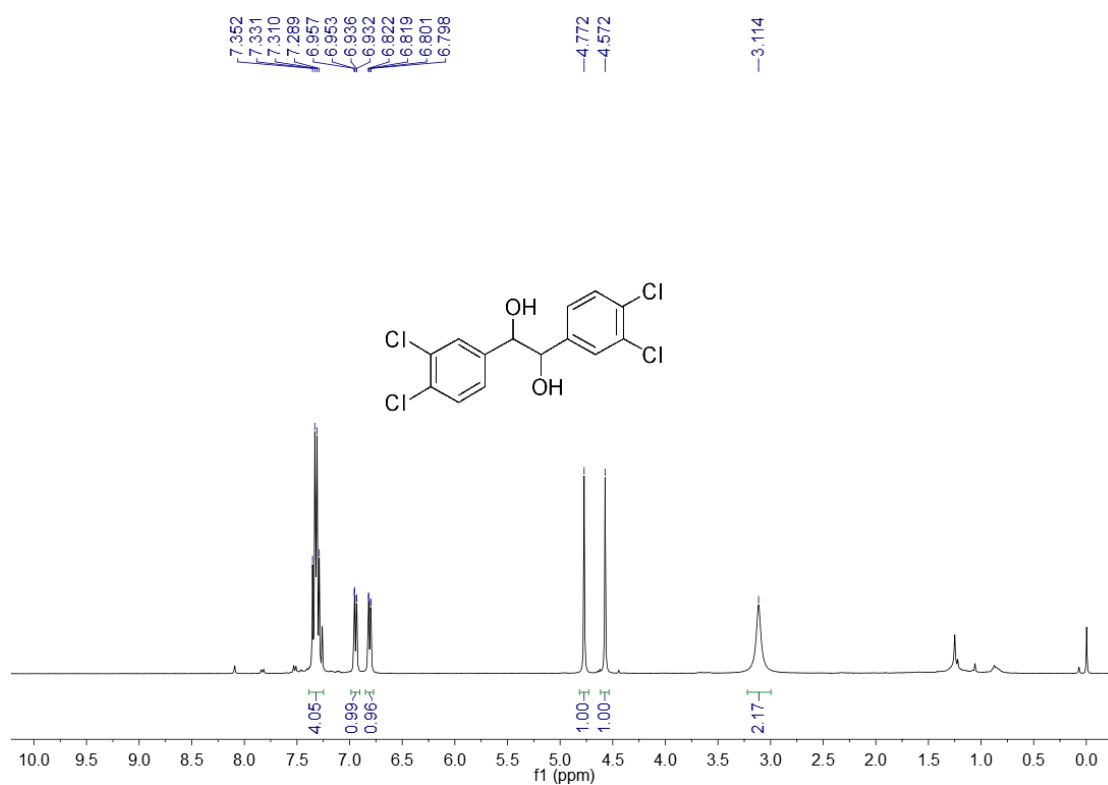

$^{13}\text{C}$  NMR spectrum of compound **2n** (100 MHz) in  $\text{CDCl}_3$

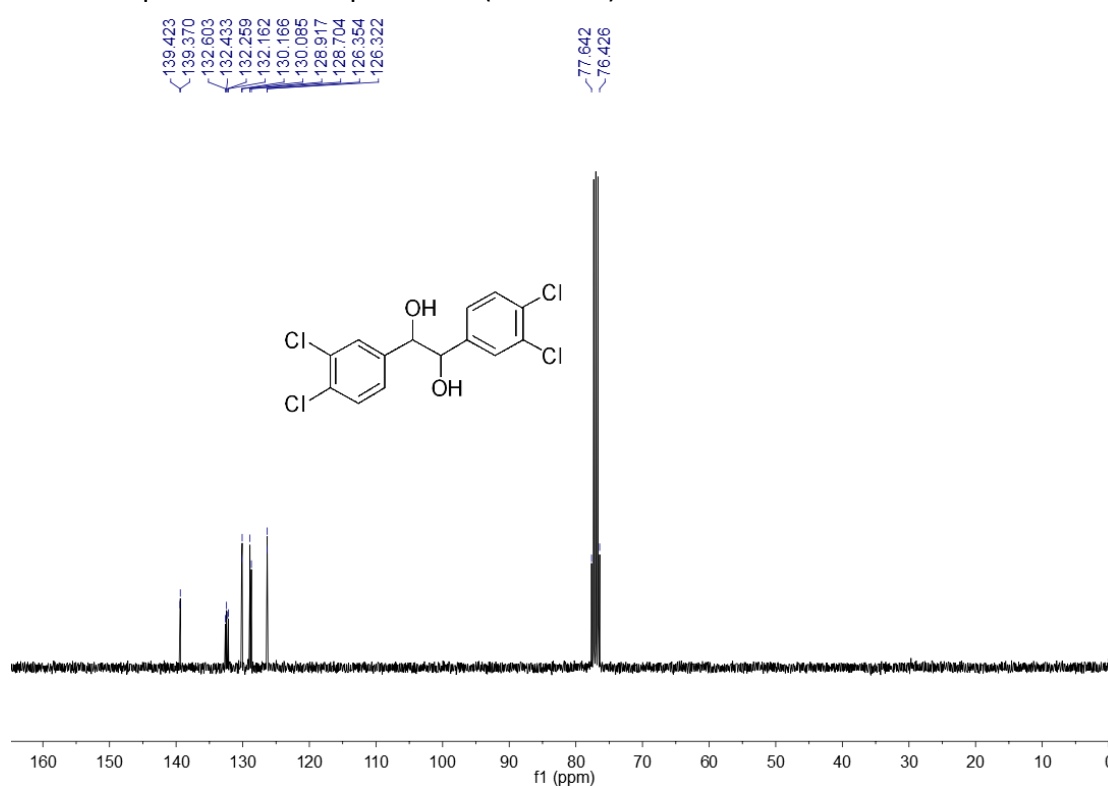



$^1\text{H}$  NMR spectrum of compound **2o** (400 MHz) in  $\text{CDCl}_3$

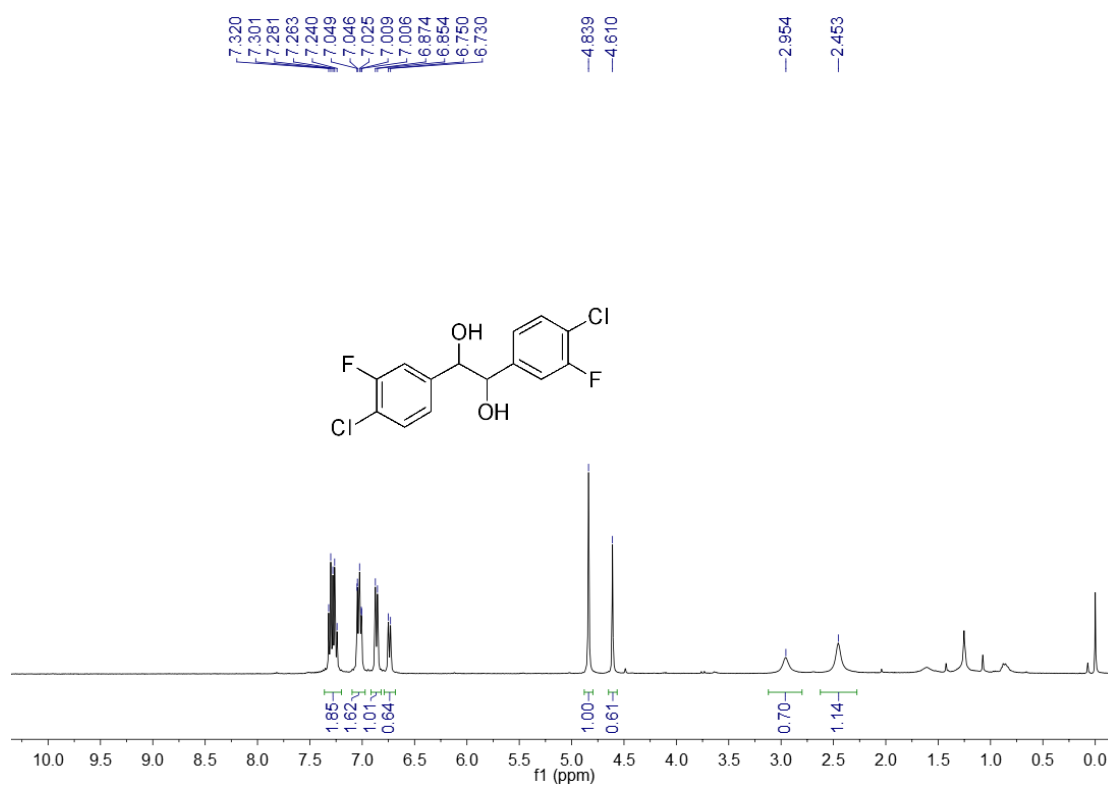

$^{13}\text{C}$  NMR spectrum of compound **2o** (100 MHz) in  $\text{CDCl}_3$

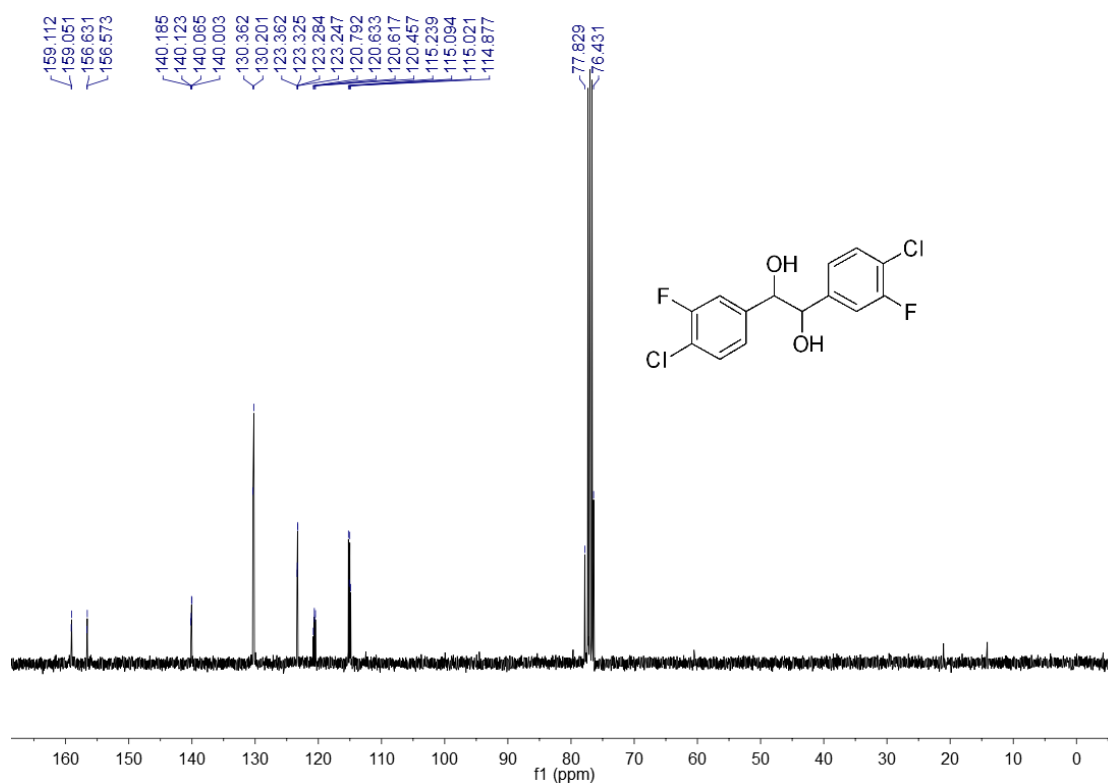



$^{19}\text{F}$  NMR spectrum of compound **2o** (376 MHz) in  $\text{CDCl}_3$

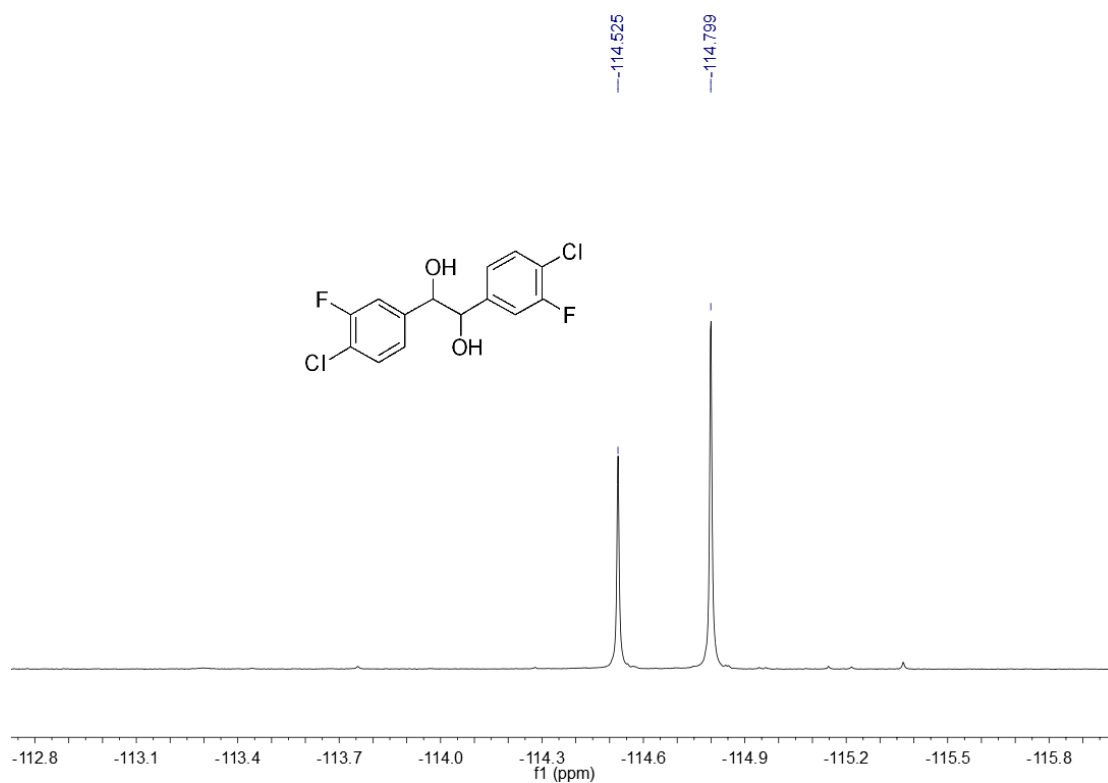

$^1\text{H}$  NMR spectrum of compound **2p** (400 MHz) in  $\text{CDCl}_3$

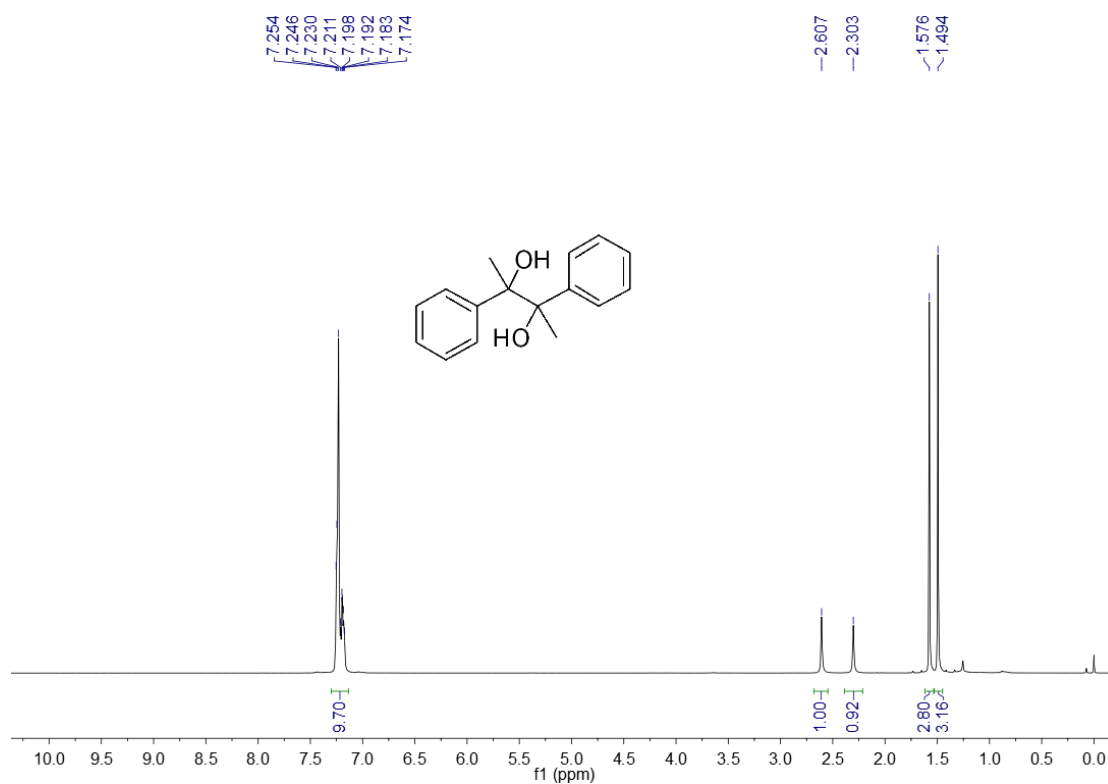



$^{13}\text{C}$  NMR spectrum of compound **2p** (100 MHz) in  $\text{CDCl}_3$

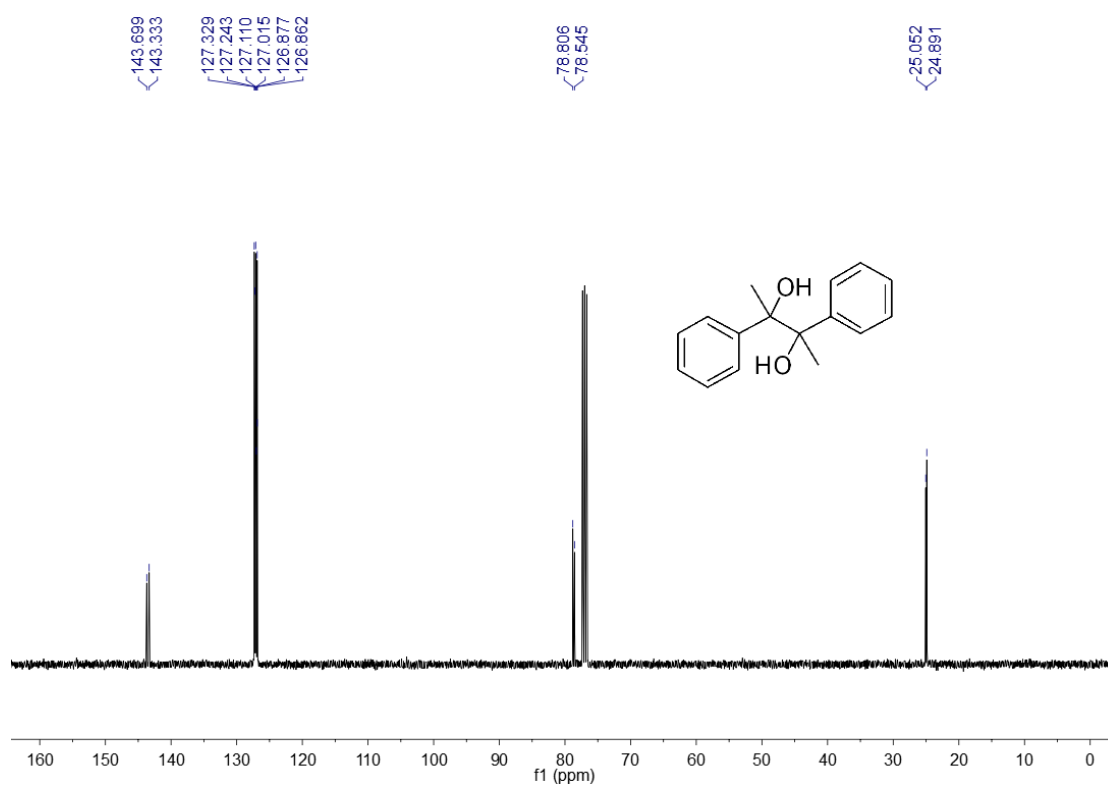

$^1\text{H}$  NMR spectrum of compound **2q** (400 MHz) in  $\text{CDCl}_3$

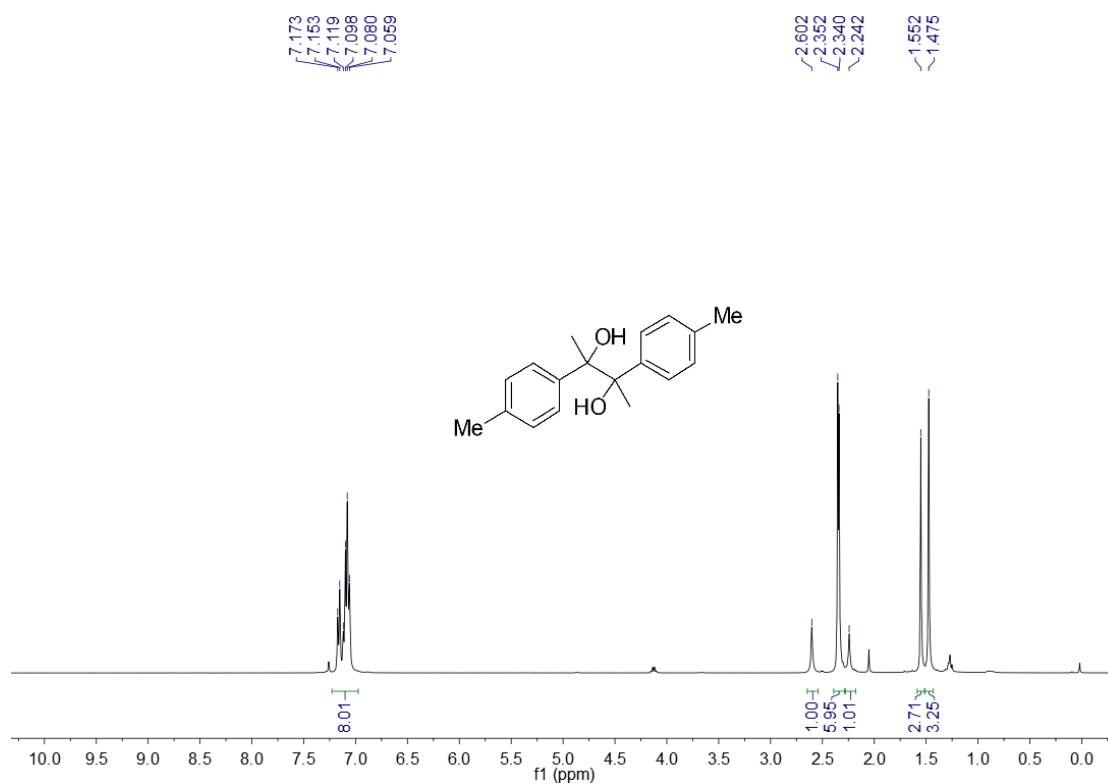



$^{13}\text{C}$  NMR spectrum of compound **2q** (100 MHz) in  $\text{CDCl}_3$

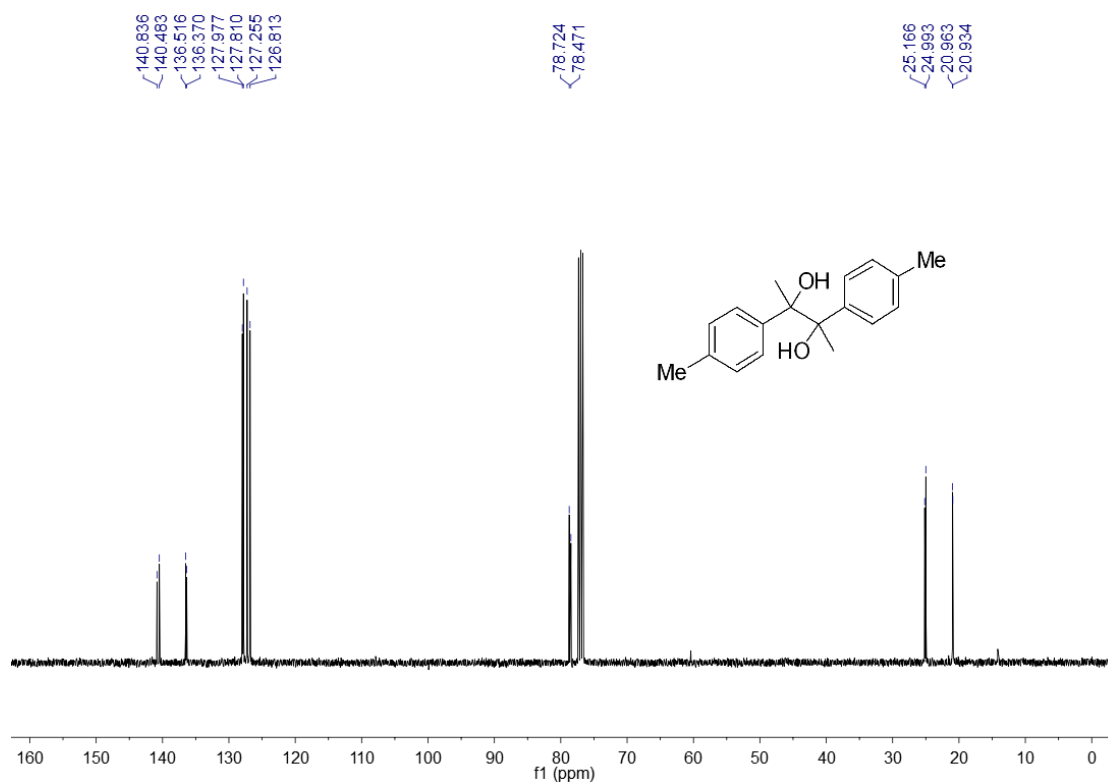

$^1\text{H}$  NMR spectrum of compound **2r** (400 MHz) in  $\text{CDCl}_3$

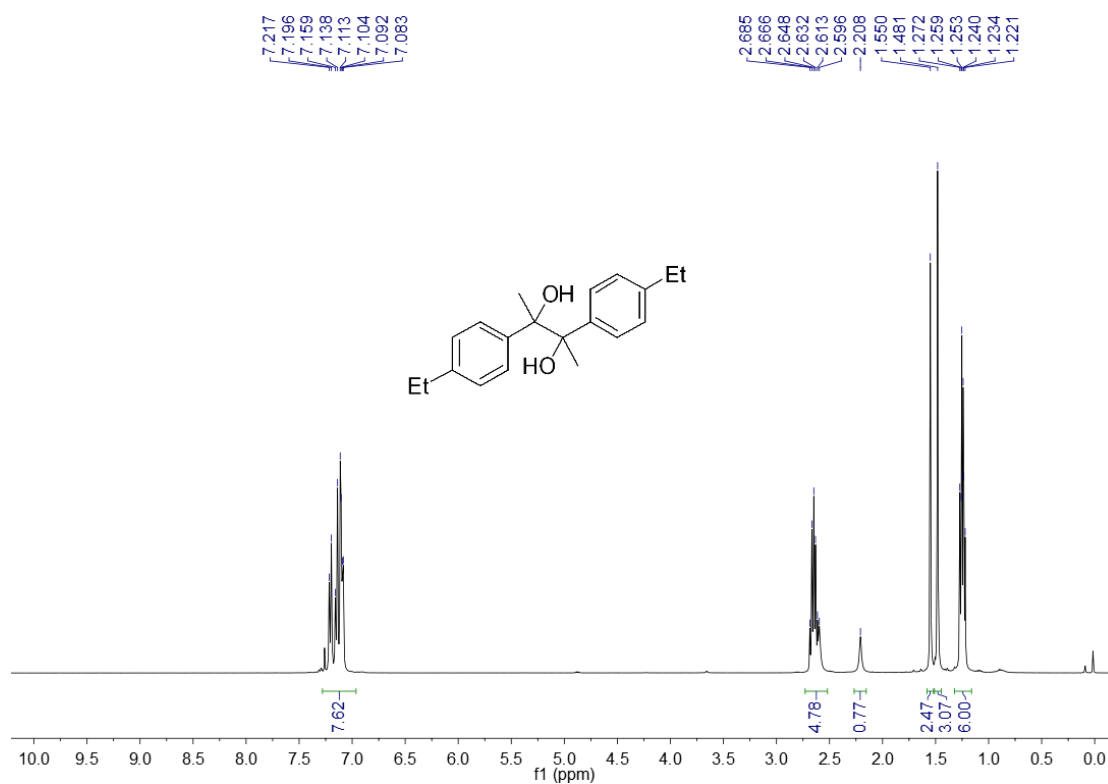



$^{13}\text{C}$  NMR spectrum of compound **2r** (100 MHz) in  $\text{CDCl}_3$

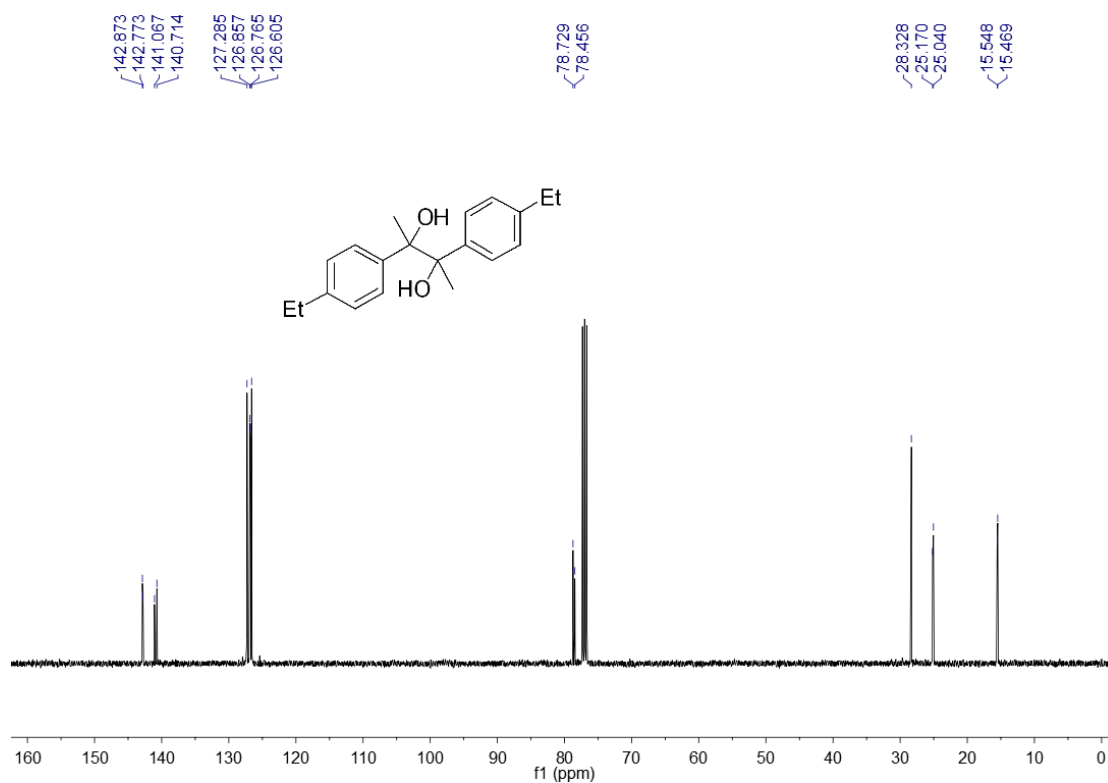

$^1\text{H}$  NMR spectrum of compound **2s** (400 MHz) in  $\text{CDCl}_3$

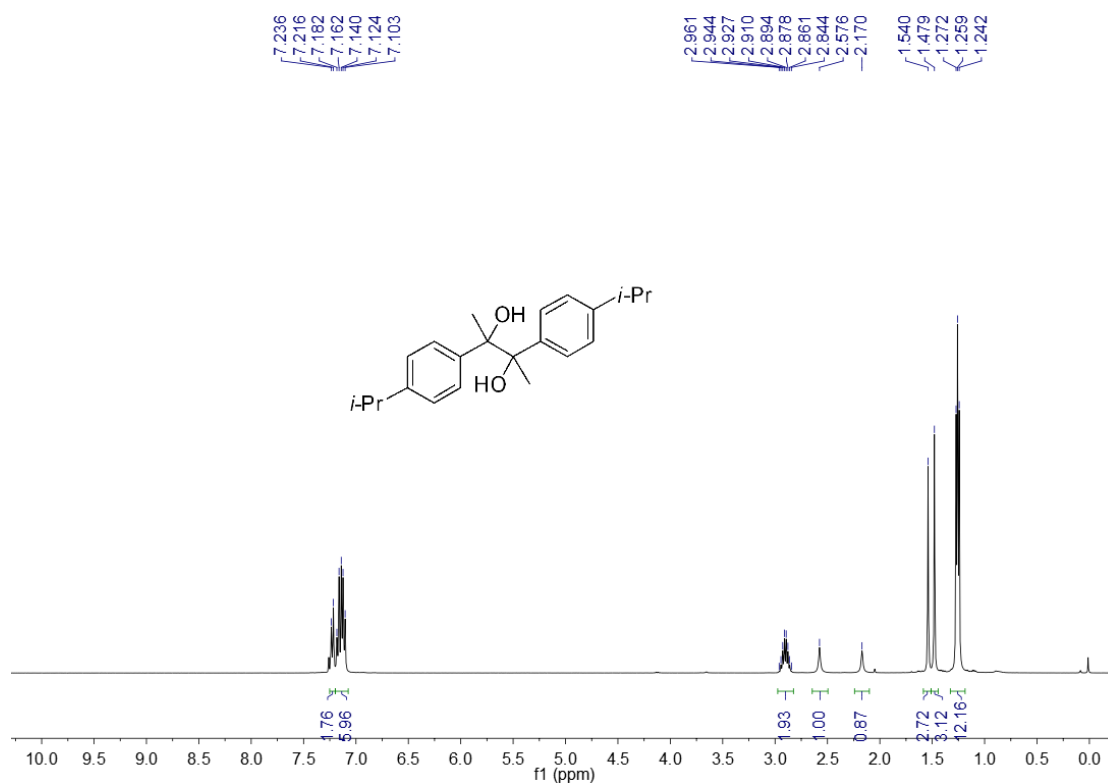



$^{13}\text{C}$  NMR spectrum of compound **2s** (100 MHz) in  $\text{CDCl}_3$

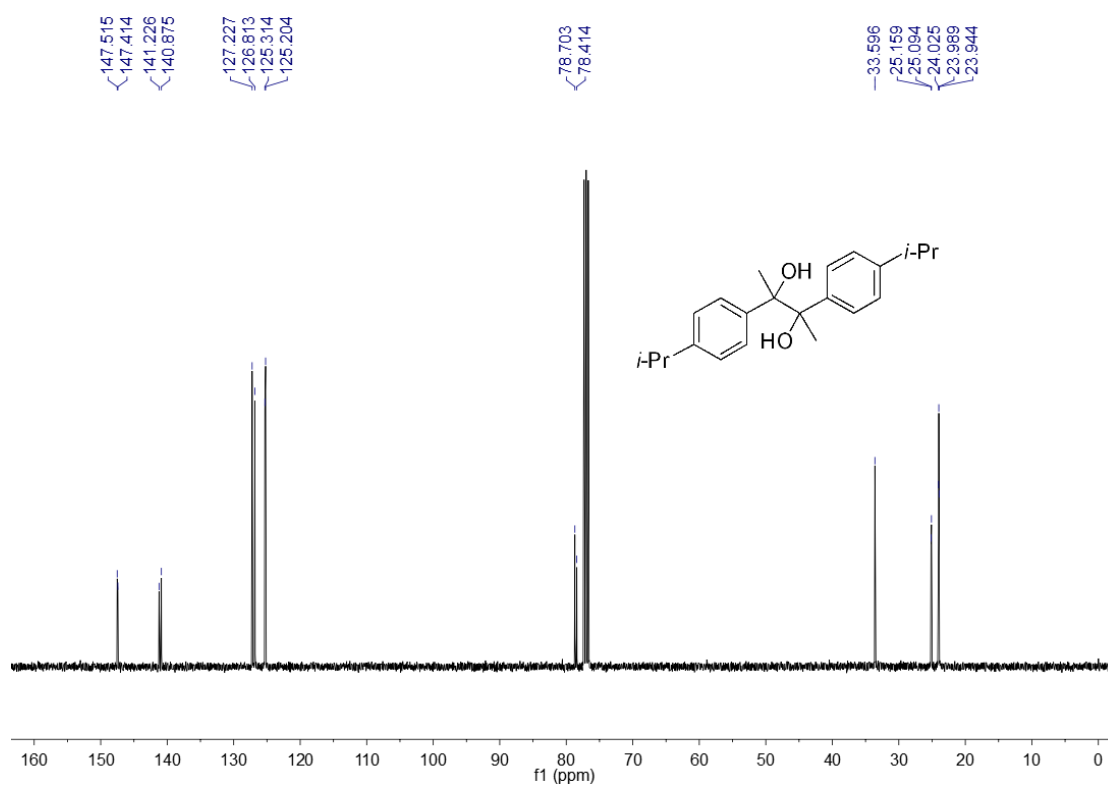

$^1\text{H}$  NMR spectrum of compound **2t** (400 MHz) in  $\text{CDCl}_3$

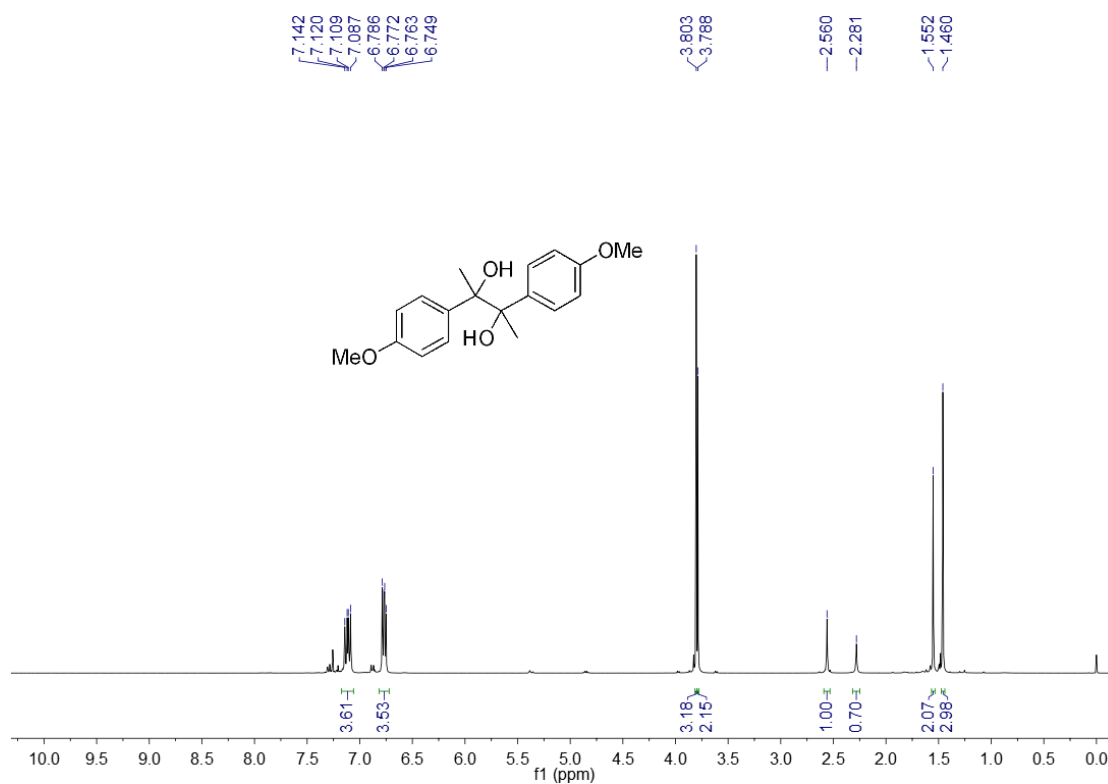



$^{13}\text{C}$  NMR spectrum of compound **2t** (100 MHz) in  $\text{CDCl}_3$

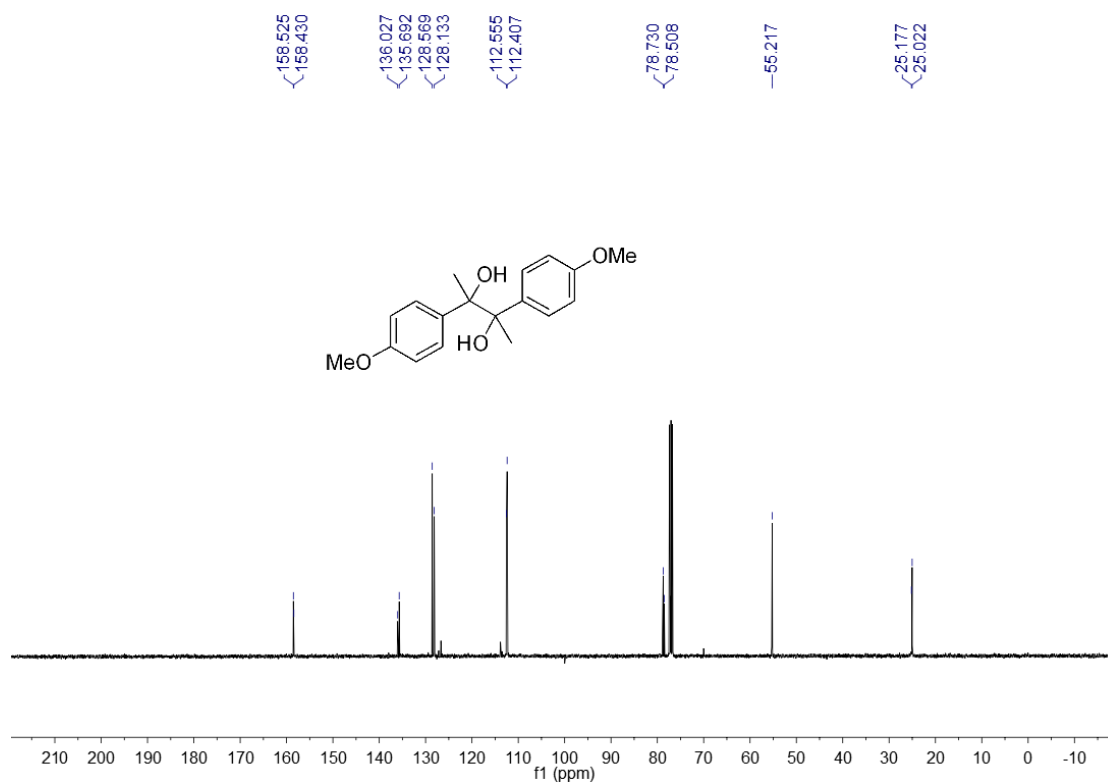

$^1\text{H}$  NMR spectrum of compound **2u** (400 MHz) in  $\text{CDCl}_3$

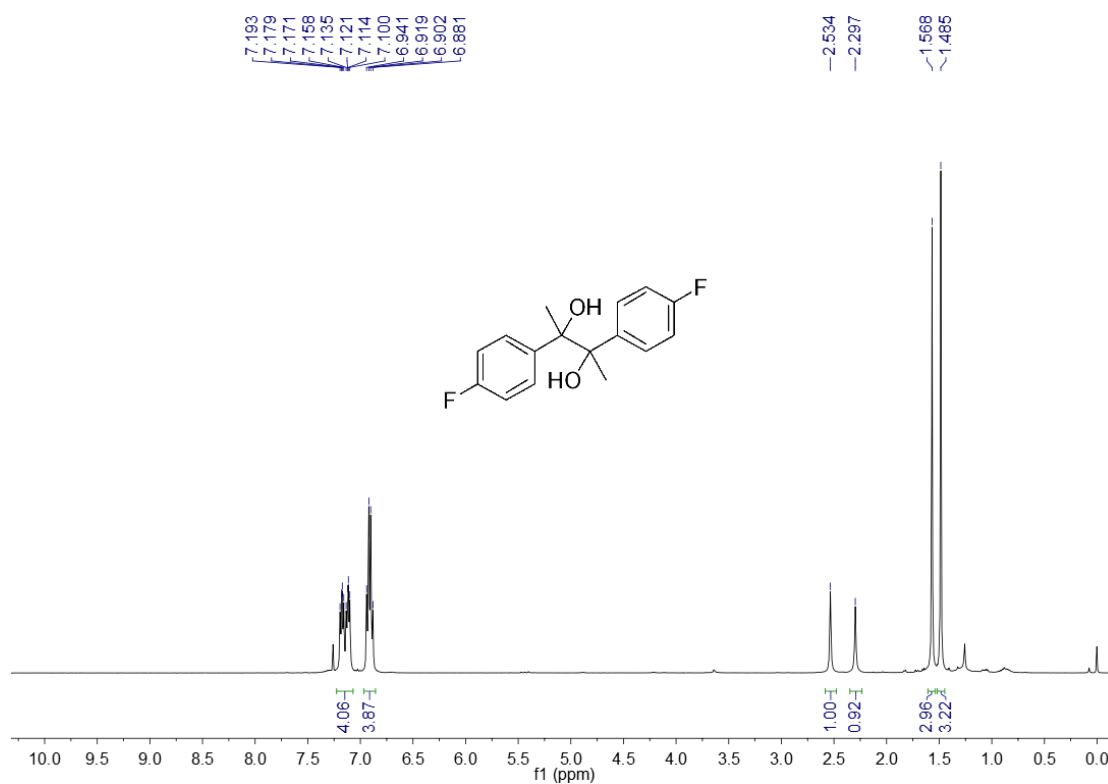



$^{13}\text{C}$  NMR spectrum of compound **2u** (100 MHz) in  $\text{CDCl}_3$

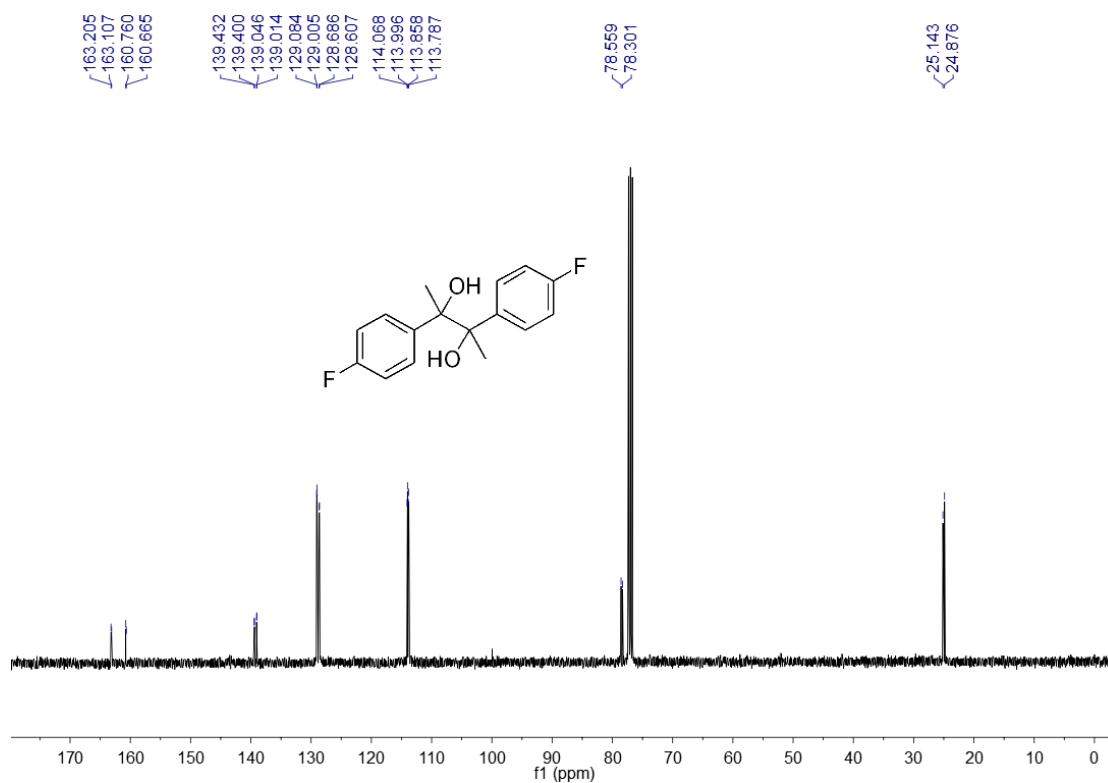

$^{19}\text{F}$  NMR spectrum of compound **2u** (376 MHz) in  $\text{CDCl}_3$

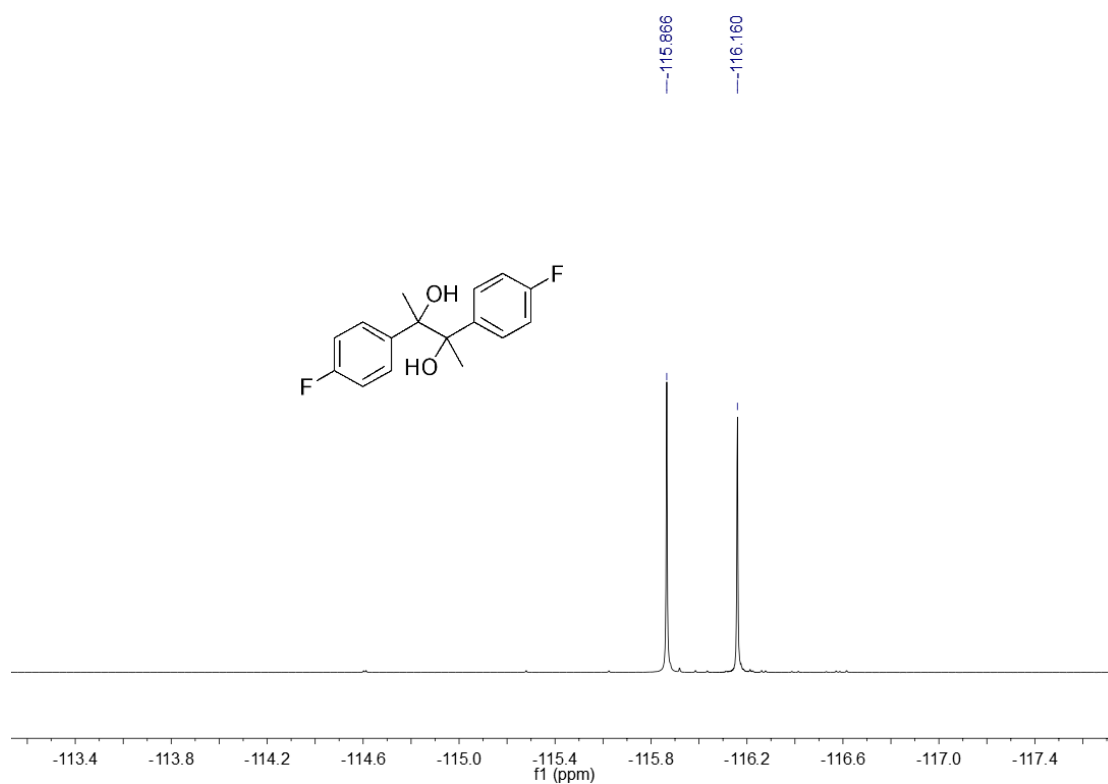



$^1\text{H}$  NMR spectrum of compound **2v** (400 MHz) in  $\text{CDCl}_3$

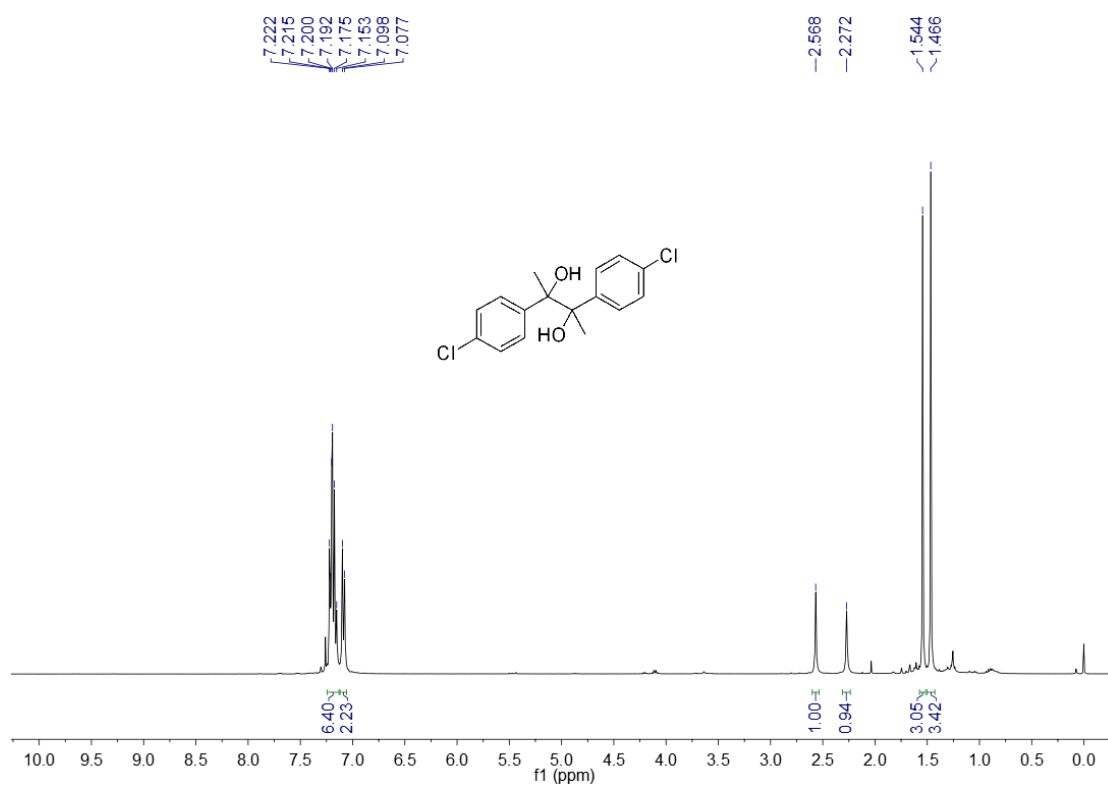

$^{13}\text{C}$  NMR spectrum of compound **2v** (100 MHz) in  $\text{CDCl}_3$

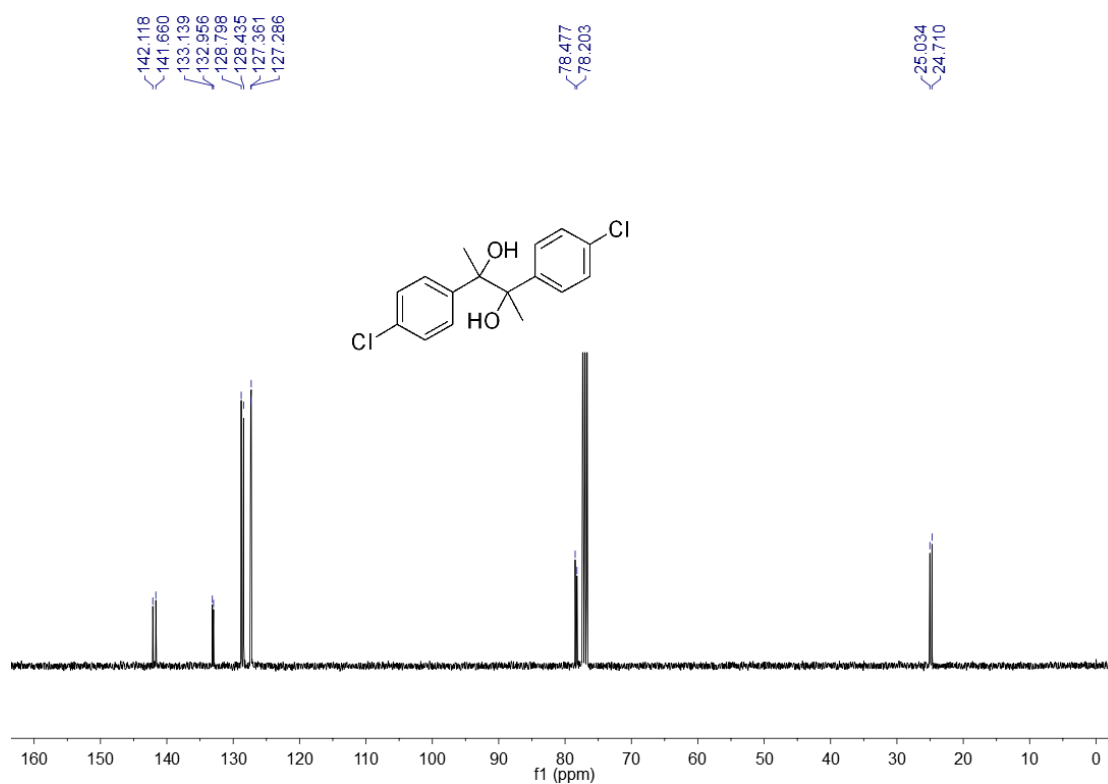



$^1\text{H}$  NMR spectrum of compound **2w** (400 MHz) in  $\text{DMSO-}d_6$

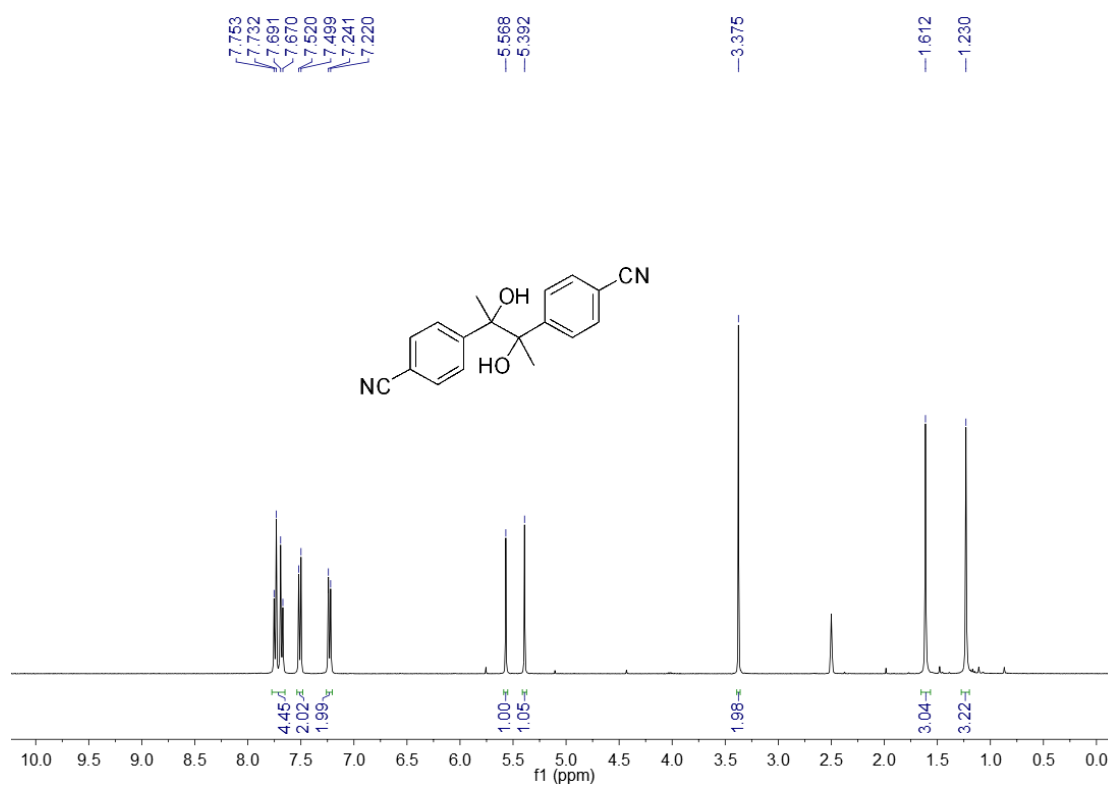

$^{13}\text{C}$  NMR spectrum of compound **2w** (100 MHz) in  $\text{DMSO-}d_6$

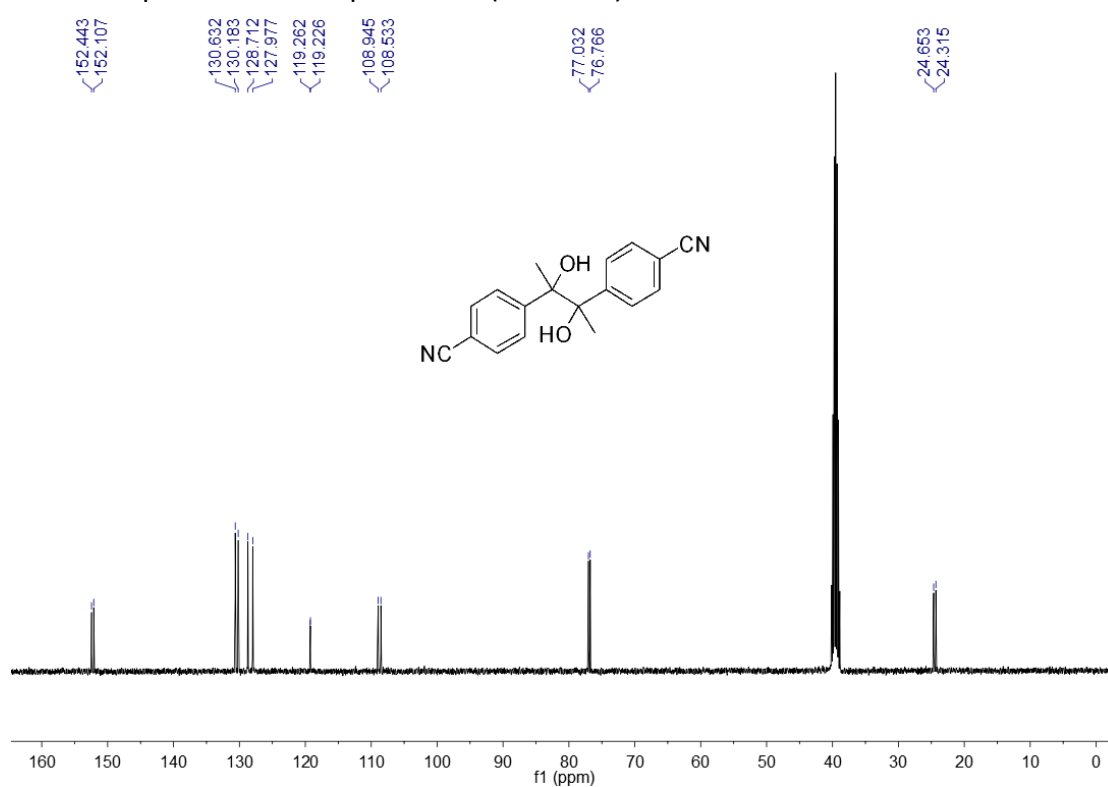



$^1\text{H}$  NMR spectrum of compound **2x** (400 MHz) in  $\text{CDCl}_3$

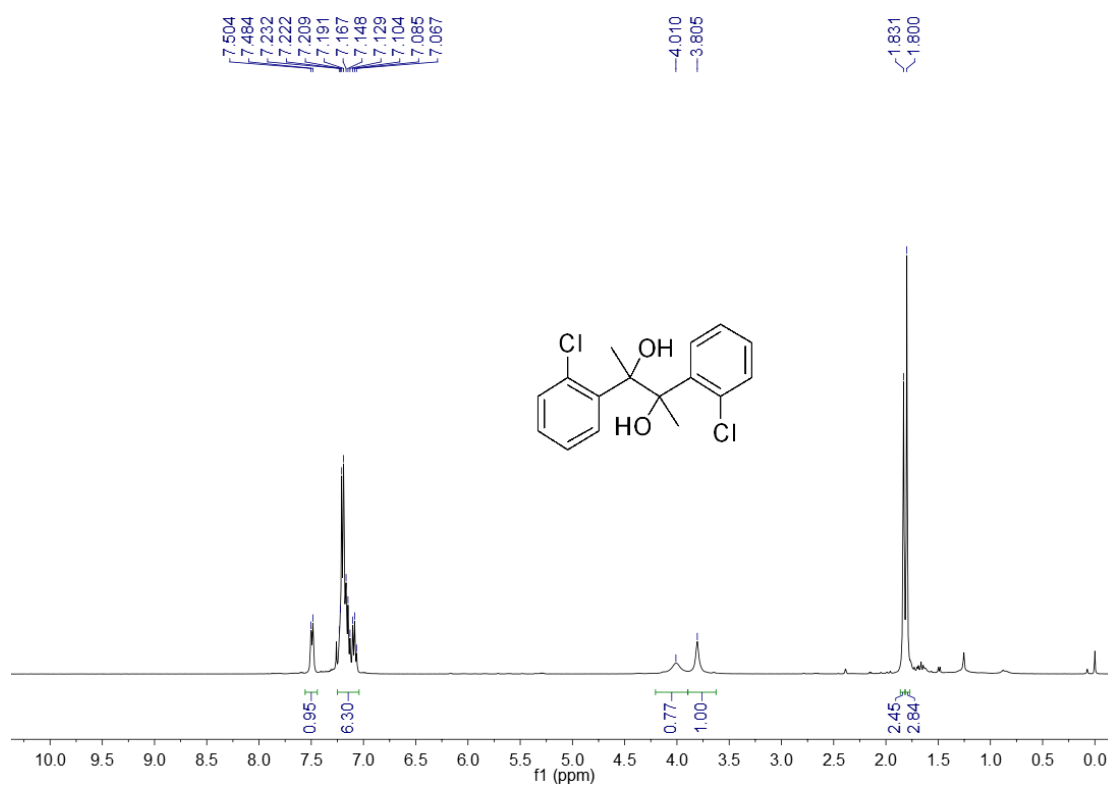

$^{13}\text{C}$  NMR spectrum of compound **2x** (100 MHz) in  $\text{CDCl}_3$

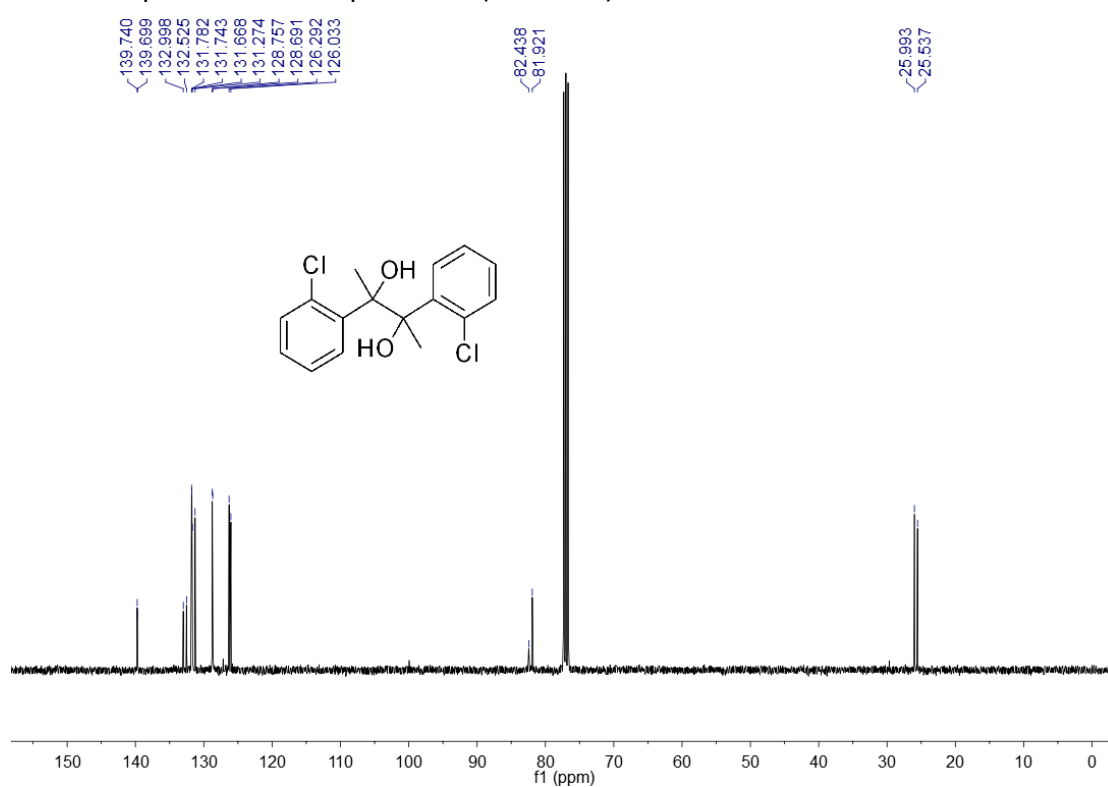



$^1\text{H}$  NMR spectrum of compound **2y** (400 MHz) in  $\text{CDCl}_3$

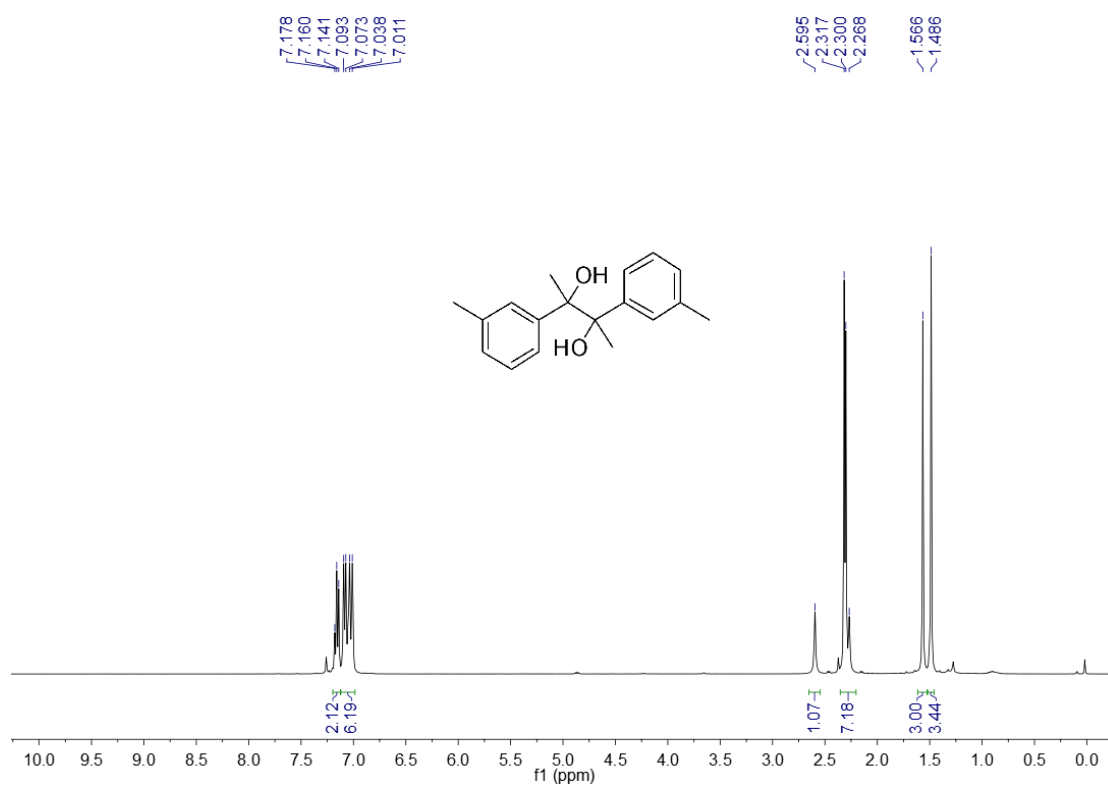

$^{13}\text{C}$  NMR spectrum of compound **2y** (100 MHz) in  $\text{CDCl}_3$

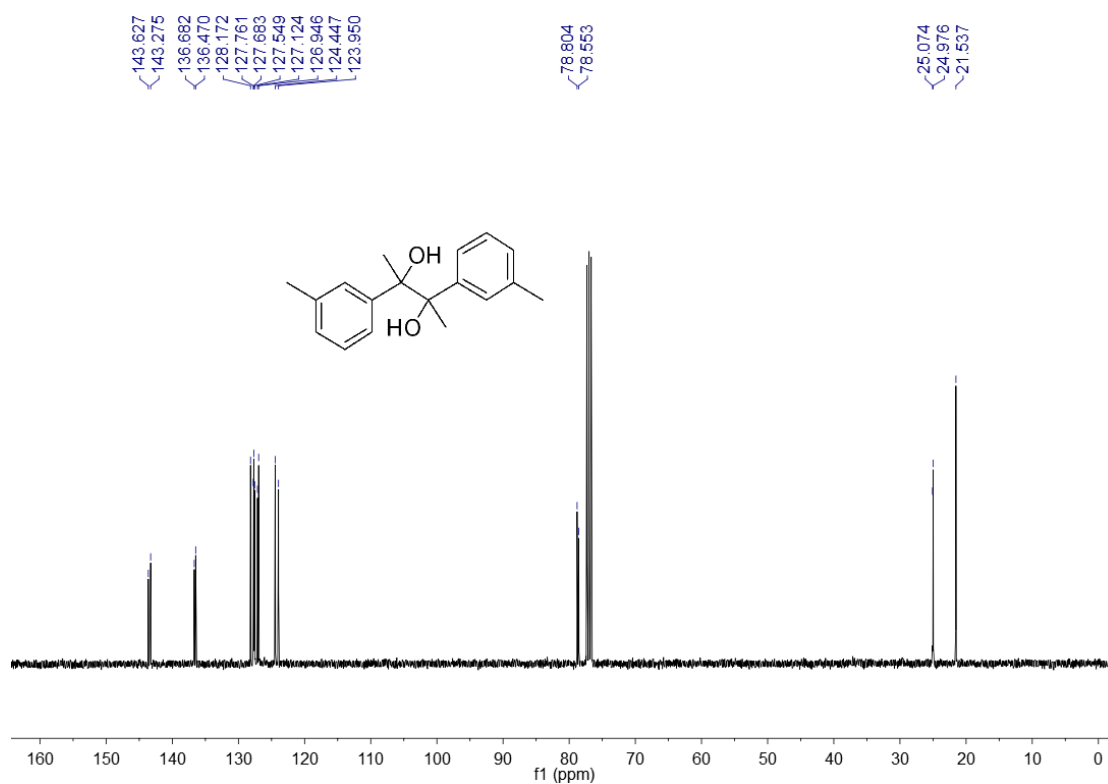



$^1\text{H}$  NMR spectrum of compound **2z** (400 MHz) in  $\text{CDCl}_3$

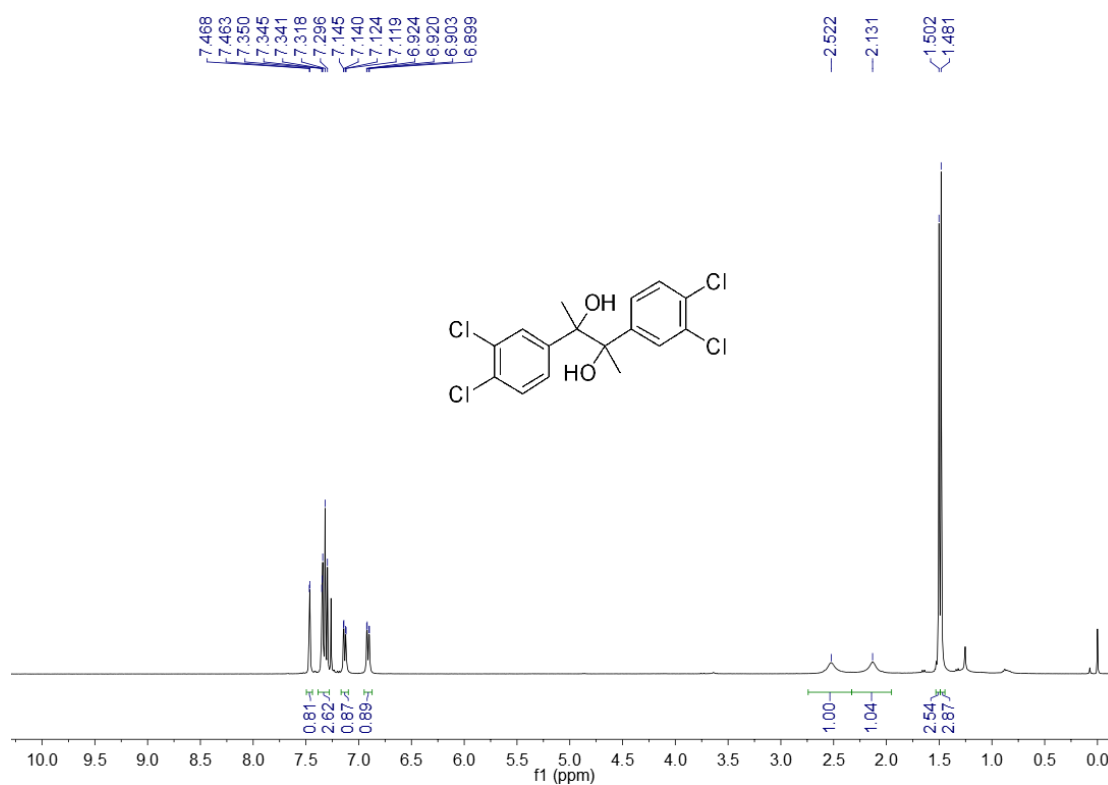

$^{13}\text{C}$  NMR spectrum of compound **2z** (100 MHz) in  $\text{CDCl}_3$

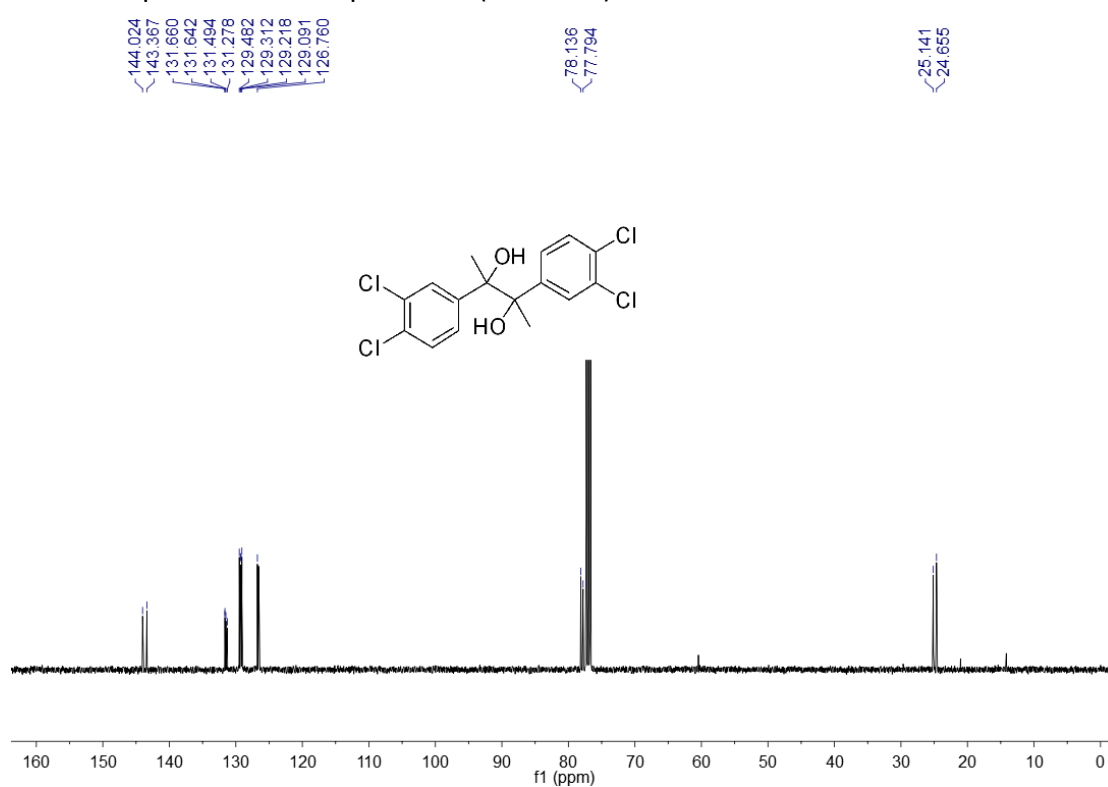



$^1\text{H}$  NMR spectrum of compound **2aa** (400 MHz) in  $\text{CDCl}_3$

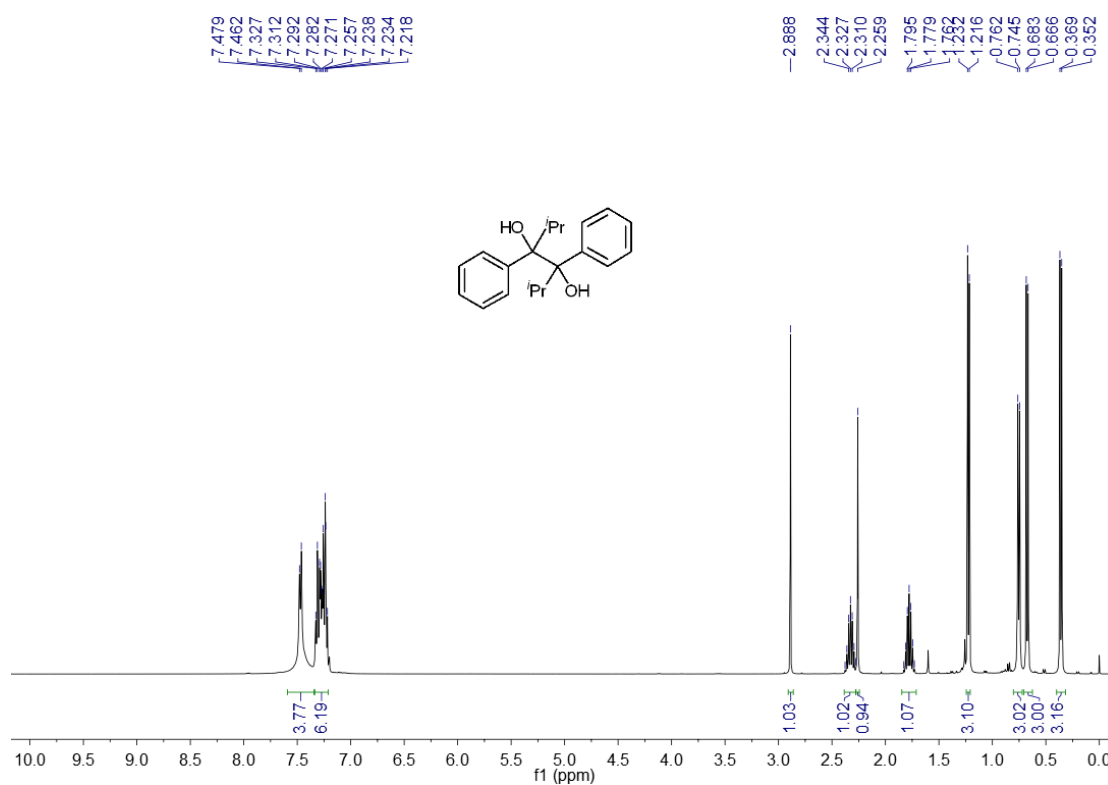

$^{13}\text{C}$  NMR spectrum of compound **2aa** (100 MHz) in  $\text{CDCl}_3$

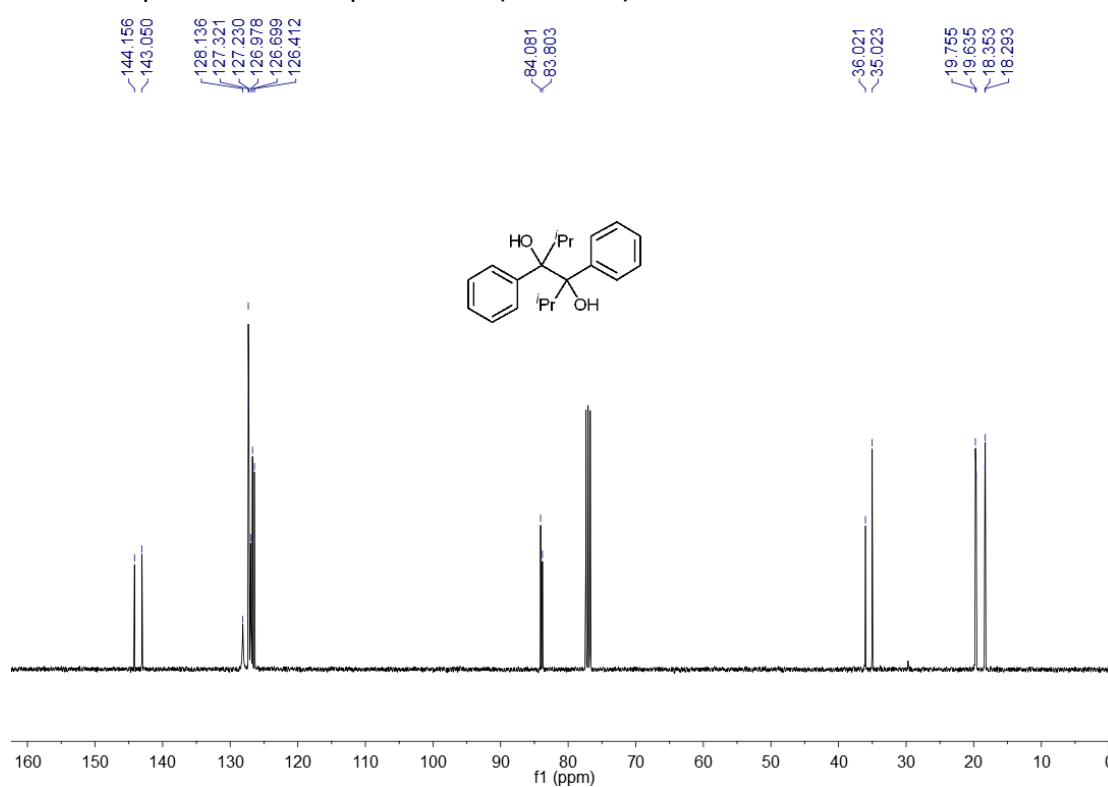



$^1\text{H}$  NMR spectrum of compound **2ab** (400 MHz) in  $\text{CDCl}_3$

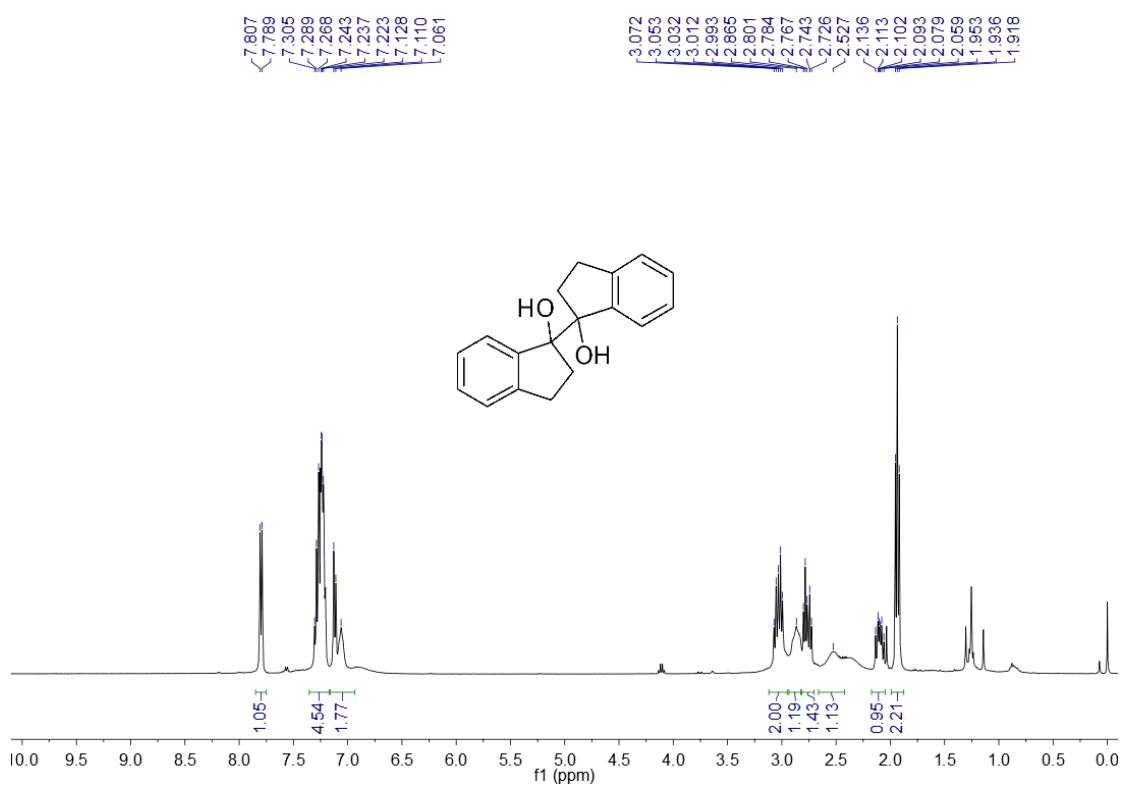

$^{13}\text{C}$  NMR spectrum of compound **2ab** (100 MHz) in  $\text{CDCl}_3$

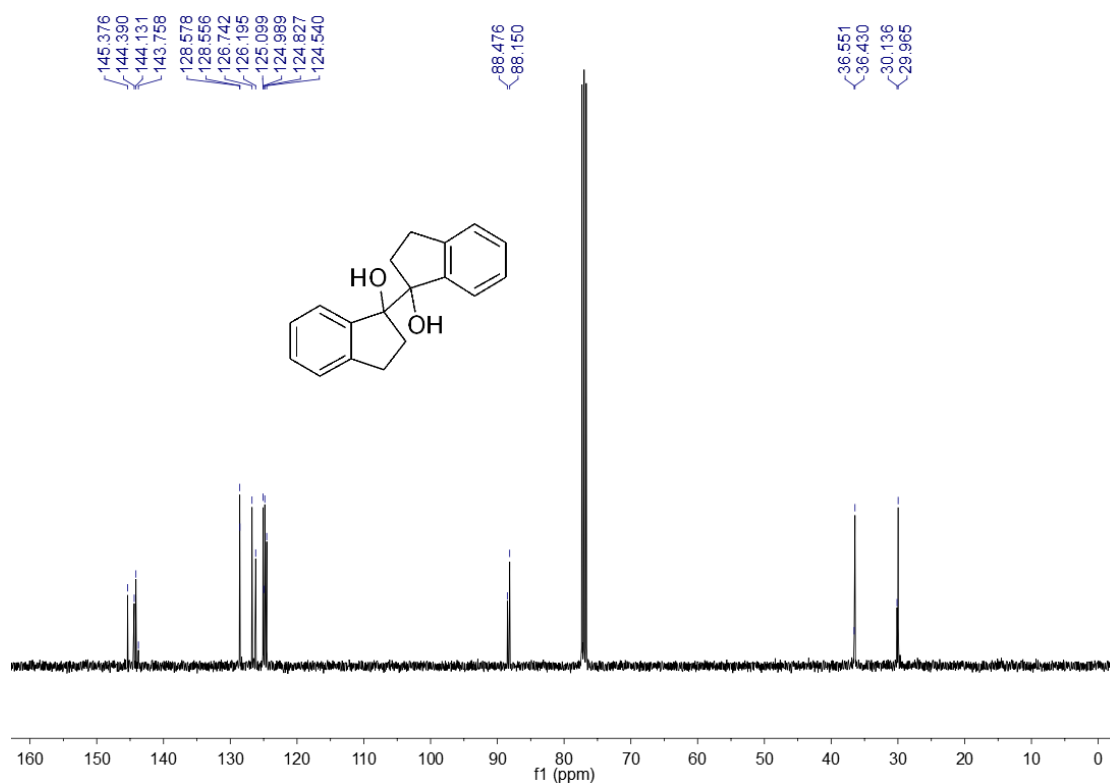



$^1\text{H}$  NMR spectrum of compound **2ac** (400 MHz) in  $\text{CDCl}_3$

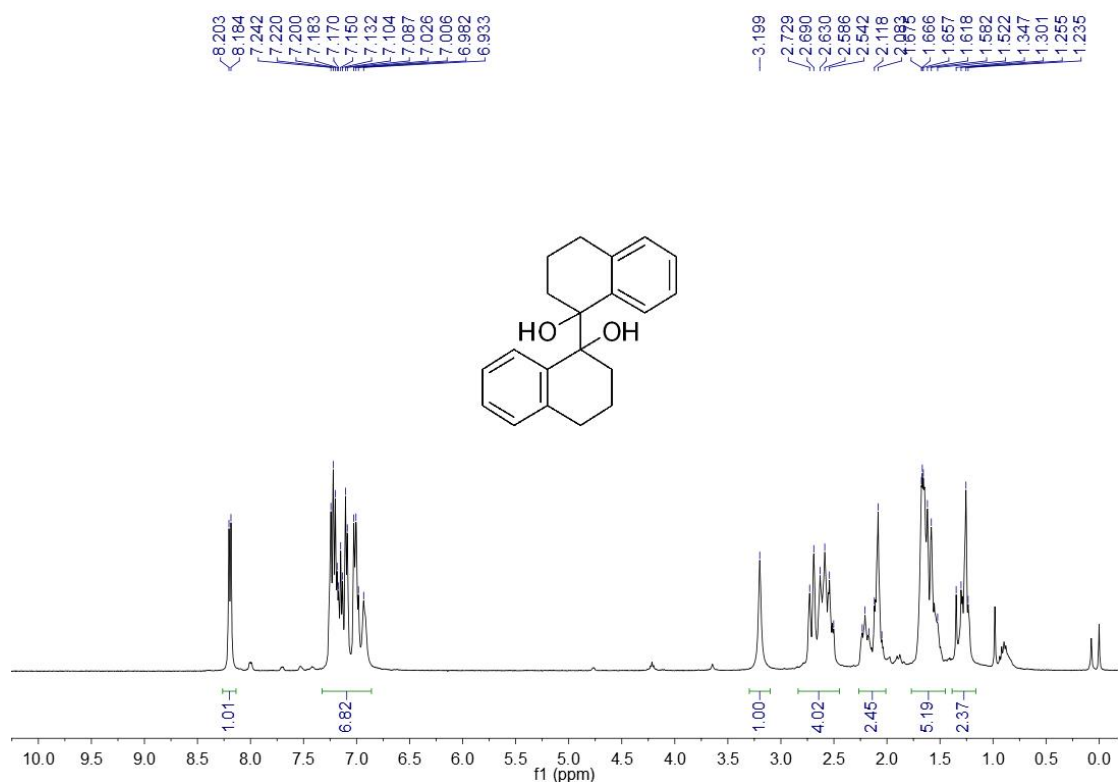

$^{13}\text{C}$  NMR spectrum of compound **2ac** (100 MHz) in  $\text{CDCl}_3$

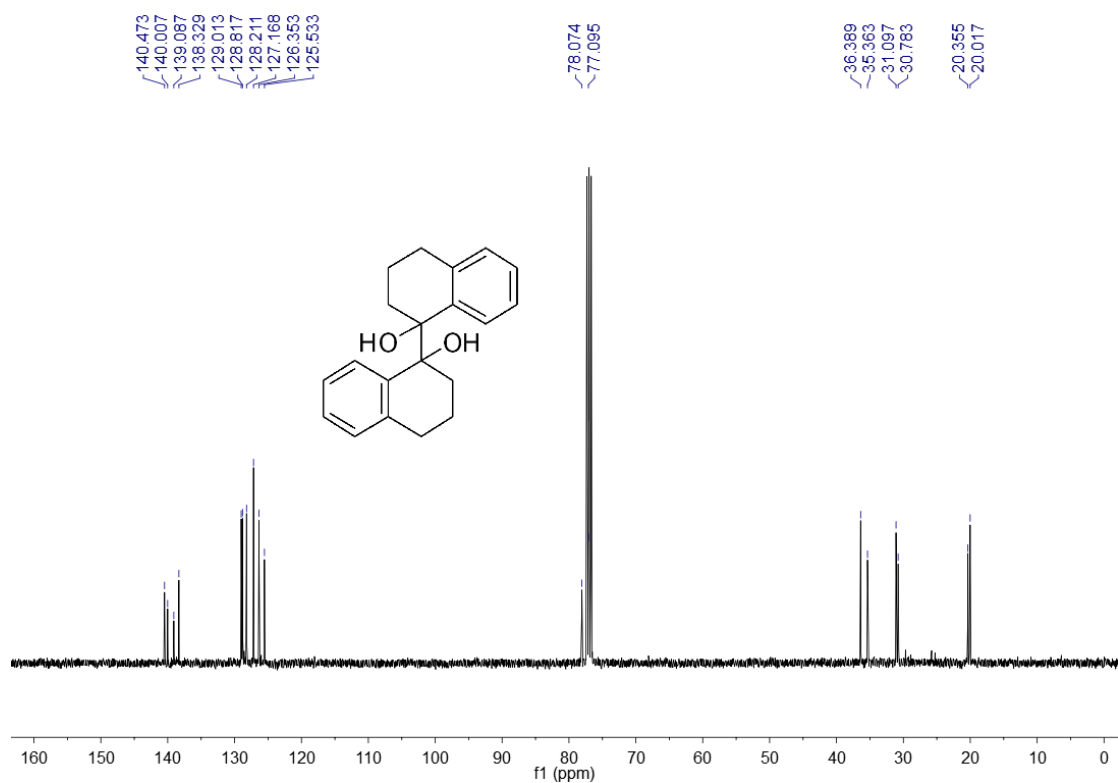



Chemical structure: OC(C(O)c1ccccc1)c2ccc(C(F)(F)F)cc2

<sup>1</sup>H NMR spectrum (ppm):

- 7.503, 7.483, 7.462, 7.448, 7.428, 7.276, 7.271, 7.265, 7.255, 7.233, 7.211, 7.206, 7.194, 7.159, 7.139, 7.134, 7.082, 7.075, 7.070, 7.061, 7.051, 7.042, 4.868, 4.849, 4.806, 4.793, 4.777, 4.703, 4.684, 4.638, 4.585, 4.566
- Integration: 1.96, 6.44, 1.35, 1.00, 1.04, 2.19
- Peak labels: -3.281, -2.874, -0.000

Figure 1 displays the  $^{13}\text{C}$  NMR spectra of (S)-1-(4-(trifluoromethyl)phenyl)-2-phenylethane-1,2-diol. The chemical structure of the compound is shown above the spectra.

The top spectrum shows the full  $^{13}\text{C}$  NMR spectrum (f1 (ppm)) with peaks labeled from 143.729 to 124.898 ppm. The middle spectrum shows a zoomed-in region of the spectrum (f1 (ppm)) with peaks labeled from 79.096 to 77.253 ppm. The bottom spectrum shows the full  $^{13}\text{C}$  NMR spectrum (f1 (ppm)) with peaks labeled from 145 to 74 ppm.



$^{19}\text{F}$  NMR spectrum of compound **4a** (376 MHz) in  $\text{CDCl}_3$

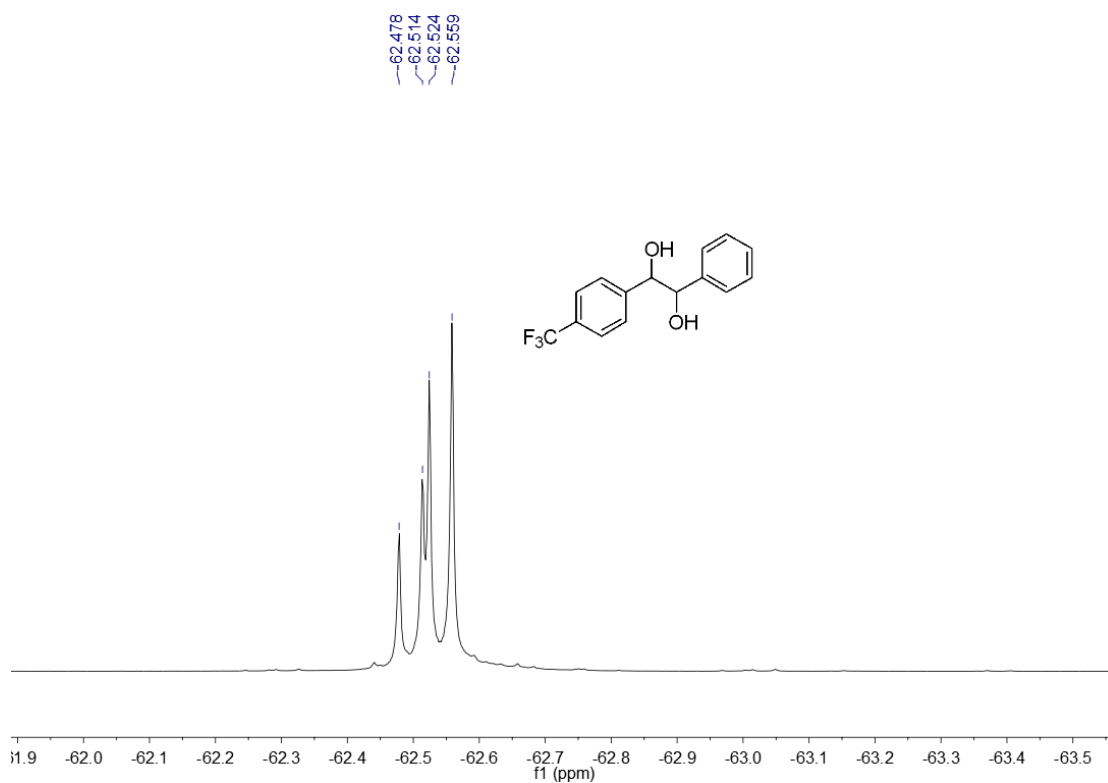

$^1\text{H}$  NMR spectrum of compound **4b** (400 MHz) in  $\text{CDCl}_3$

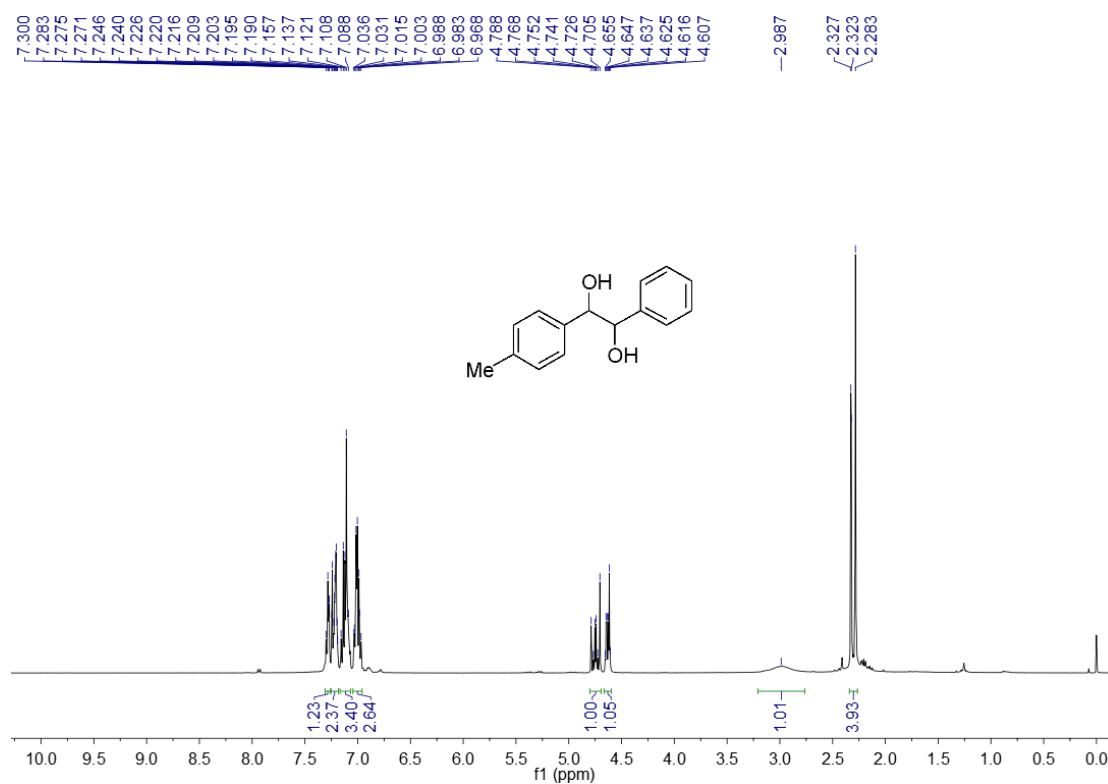



$^{13}\text{C}$  NMR spectrum of compound **4b** (100 MHz) in  $\text{CDCl}_3$

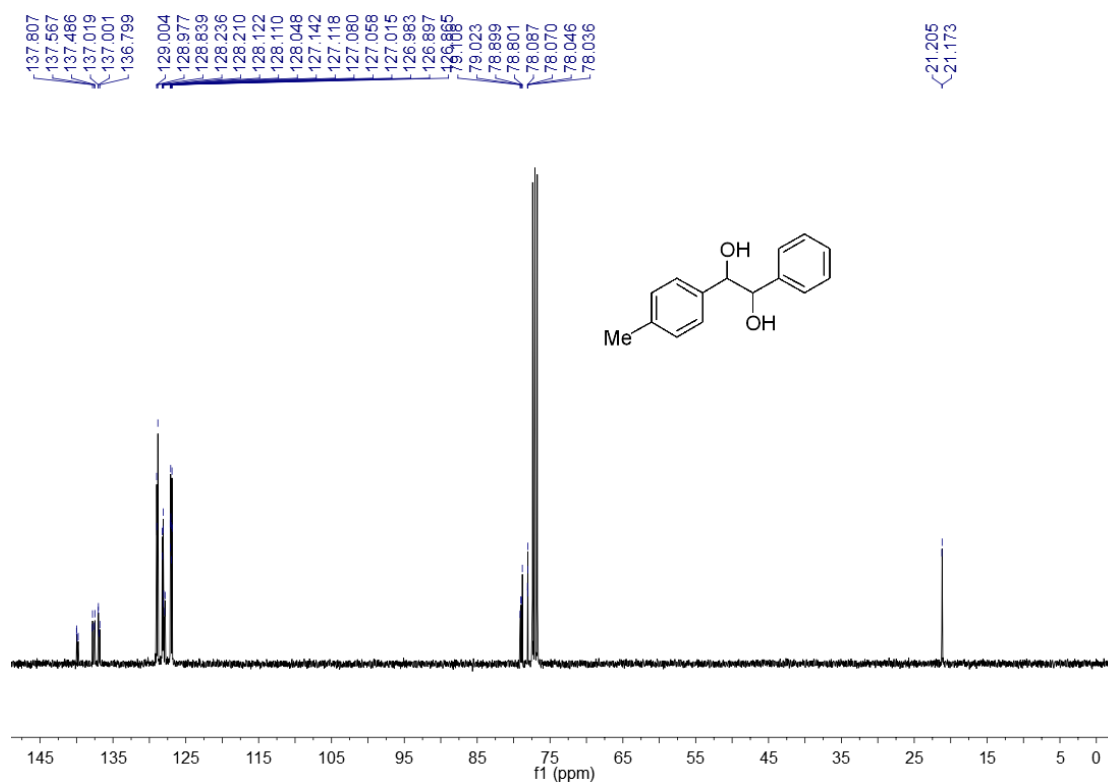

$^1\text{H}$  NMR spectrum of compound **4c** (400 MHz) in  $\text{CDCl}_3$

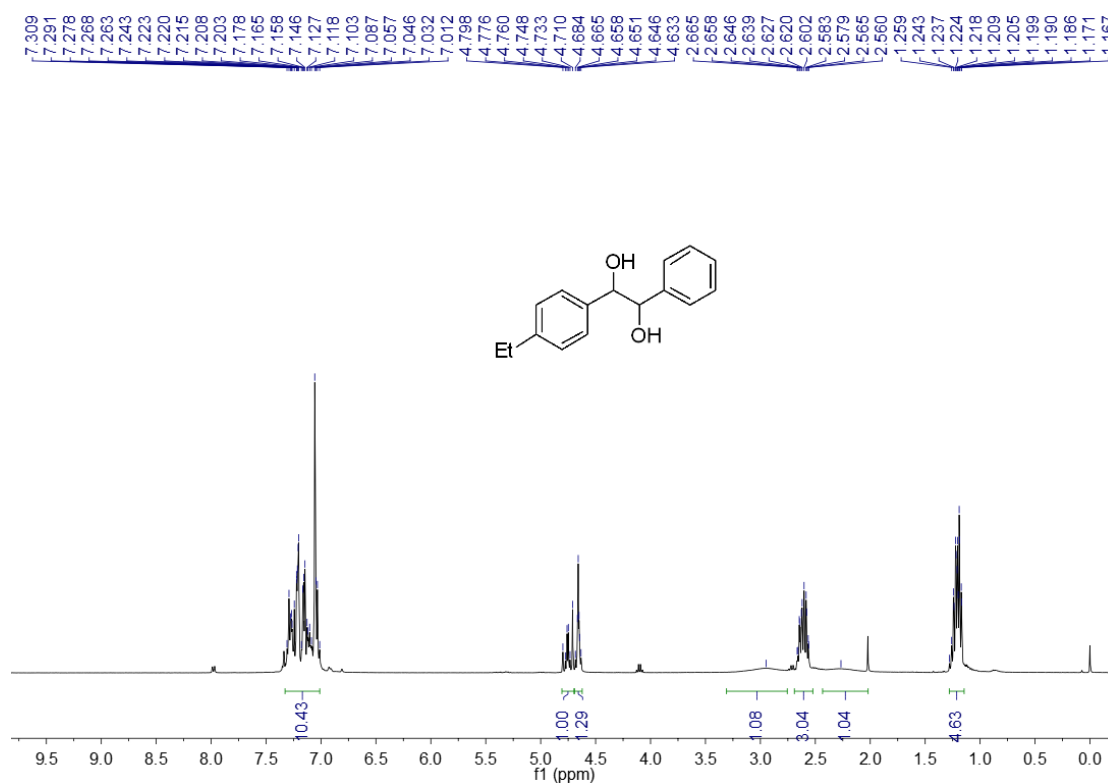



$^{13}\text{C}$  NMR spectrum of compound **4c** (100 MHz) in  $\text{CDCl}_3$

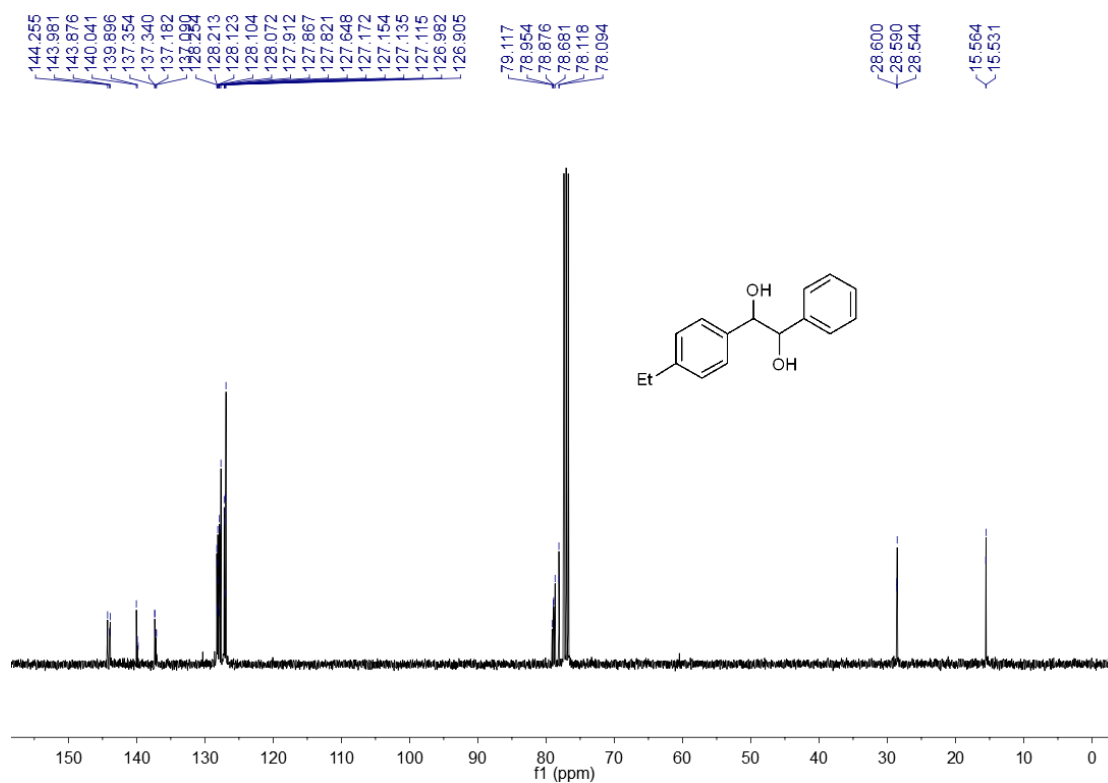

$^1\text{H}$  NMR spectrum of compound **4d** (400 MHz) in  $\text{CDCl}_3$

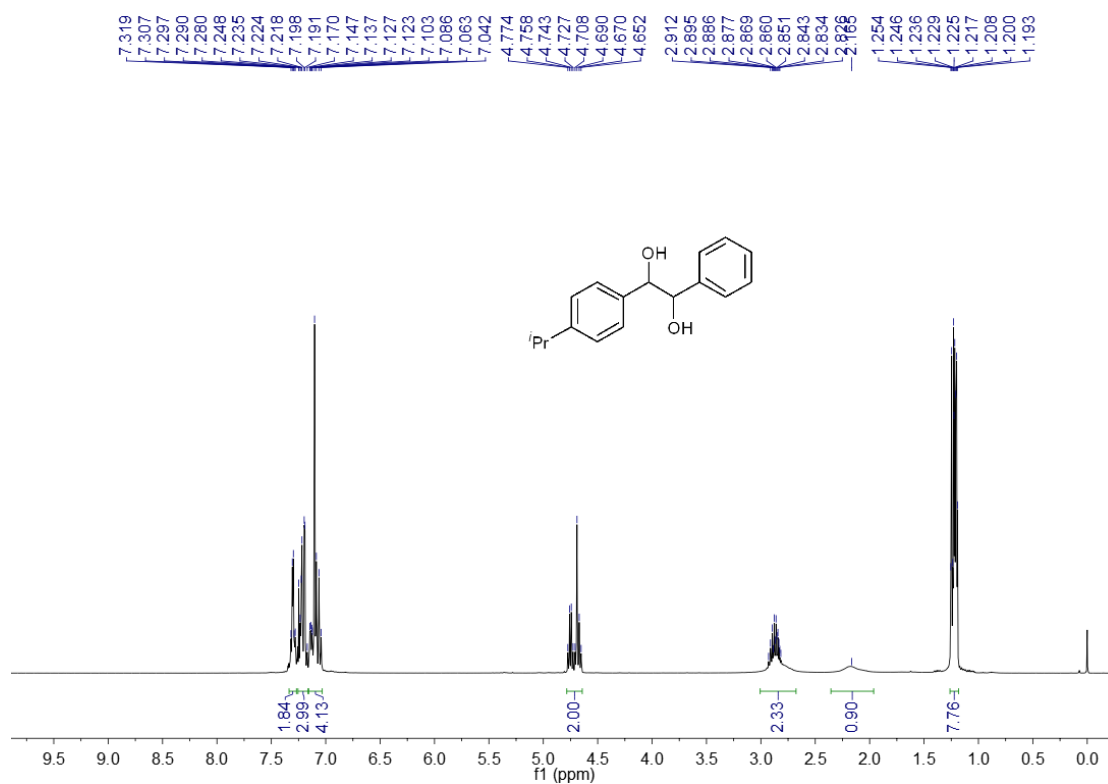



$^{13}\text{C}$  NMR spectrum of compound **4d** (100 MHz) in  $\text{CDCl}_3$

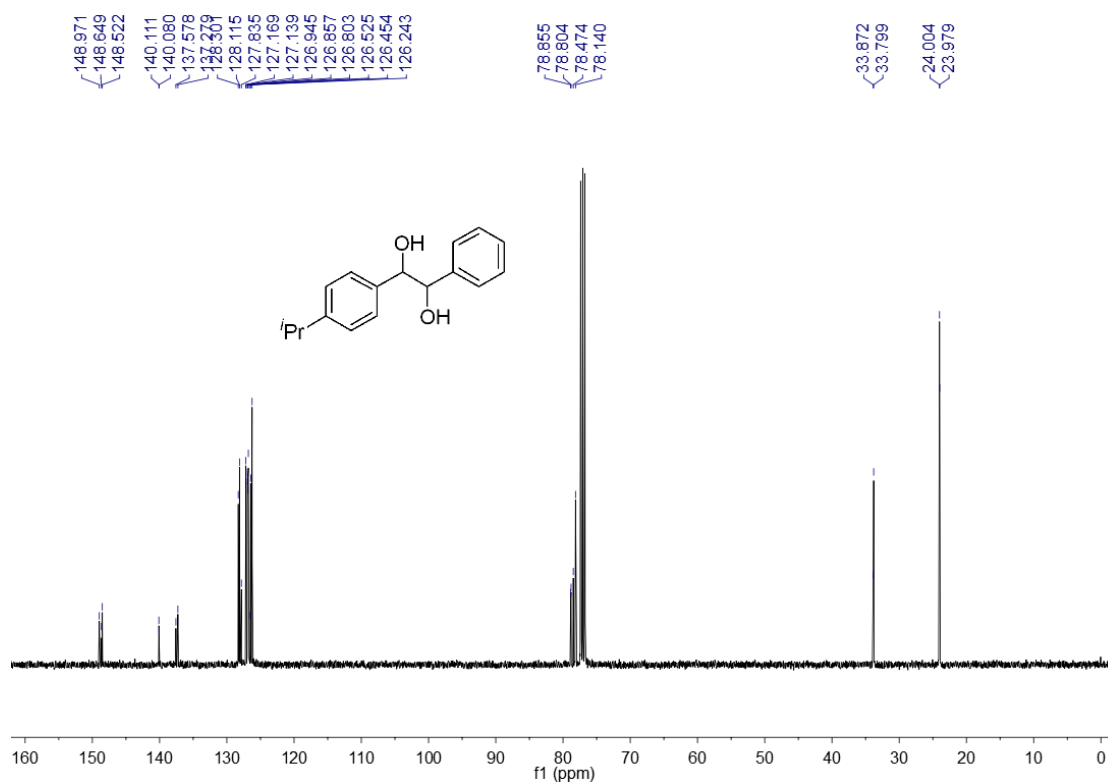

$^1\text{H}$  NMR spectrum of compound **4e** (400 MHz) in  $\text{CDCl}_3$

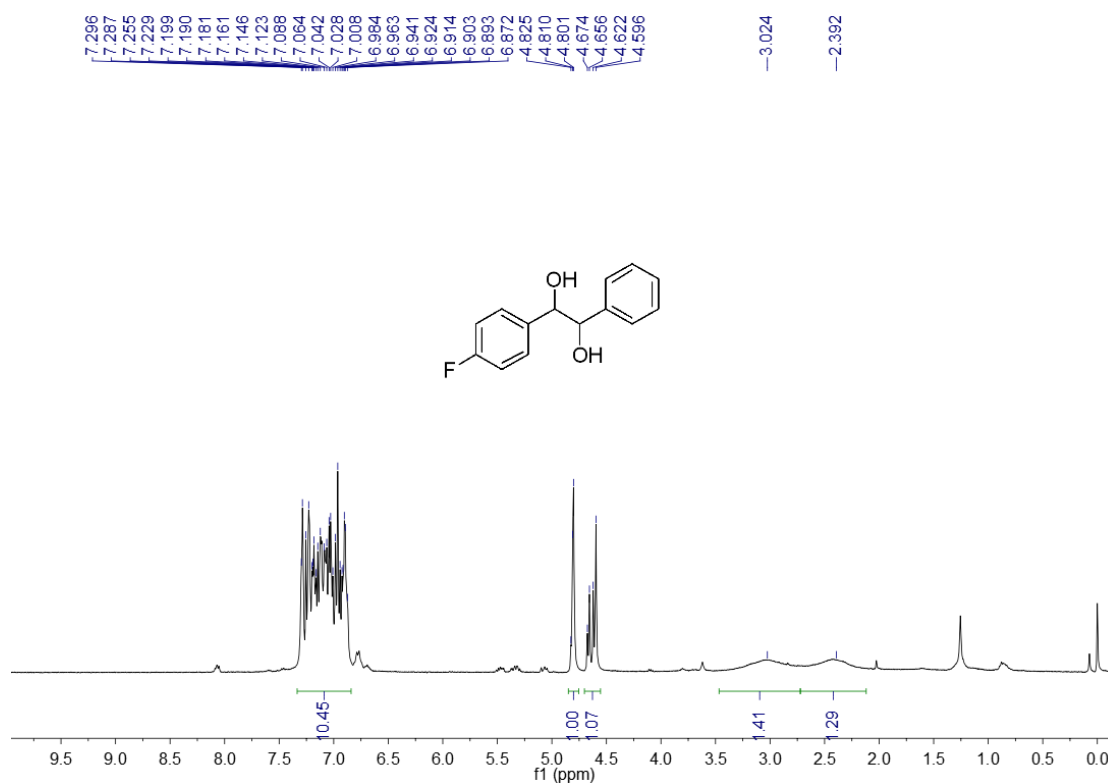



$^{13}\text{C}$  NMR spectrum of compound **4e** (100 MHz) in  $\text{CDCl}_3$

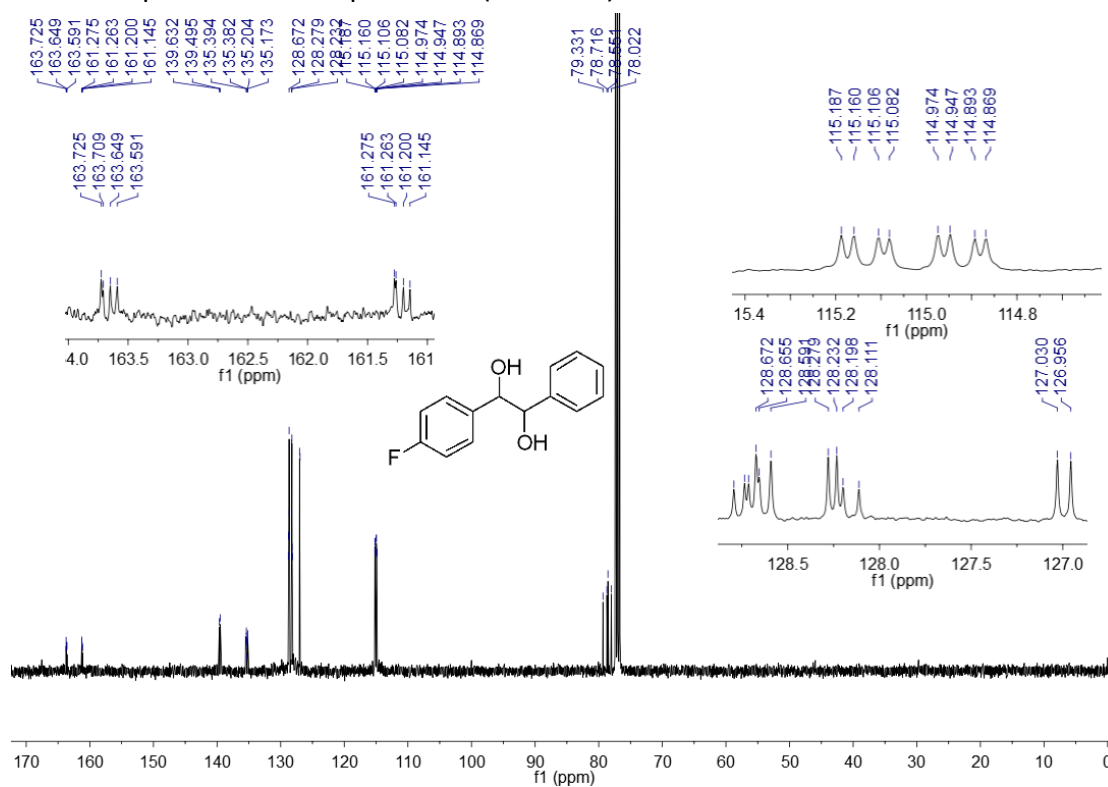

$^{19}\text{F}$  NMR spectrum of compound **4e** (376 MHz) in  $\text{CDCl}_3$

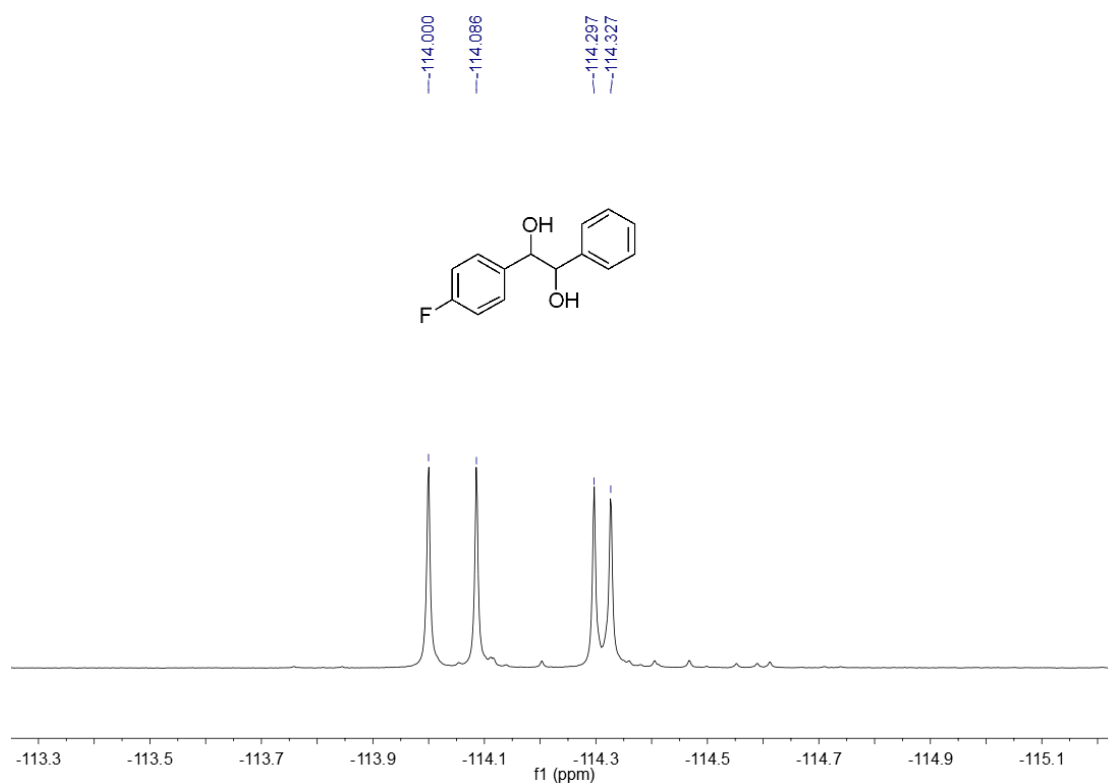



$^1\text{H}$  NMR spectrum of compound **4f** (400 MHz) in  $\text{CDCl}_3$

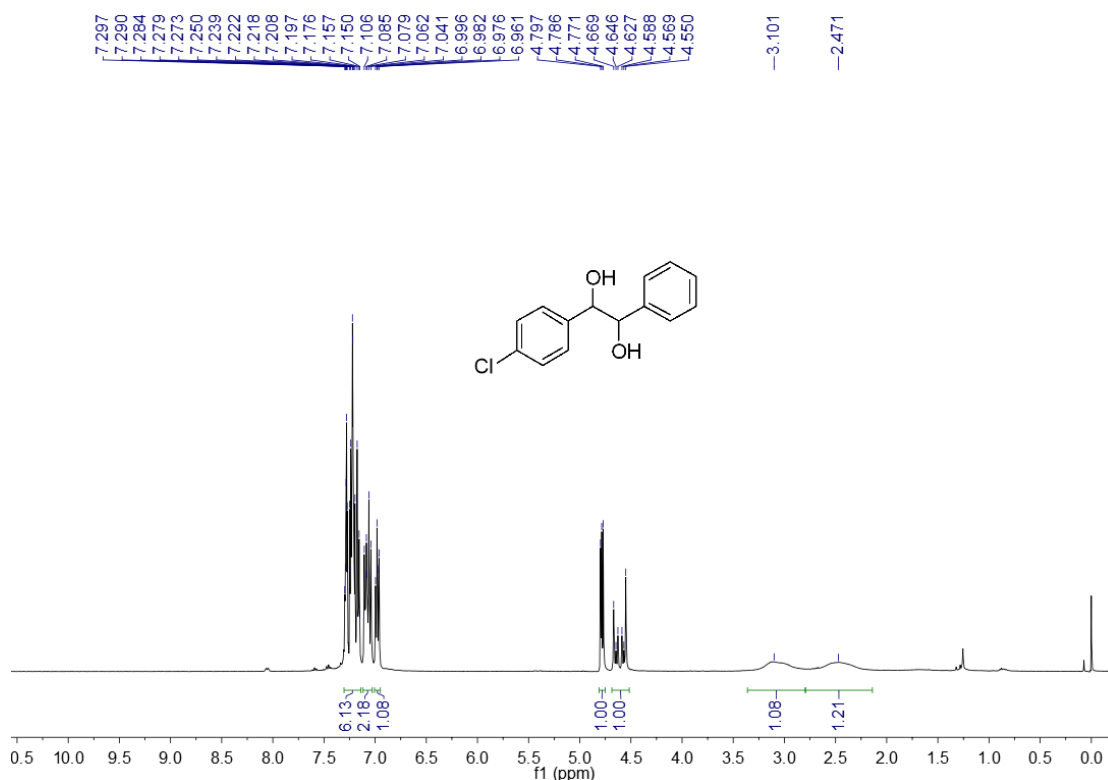

$^{13}\text{C}$  NMR spectrum of compound **4f** (100 MHz) in  $\text{CDCl}_3$

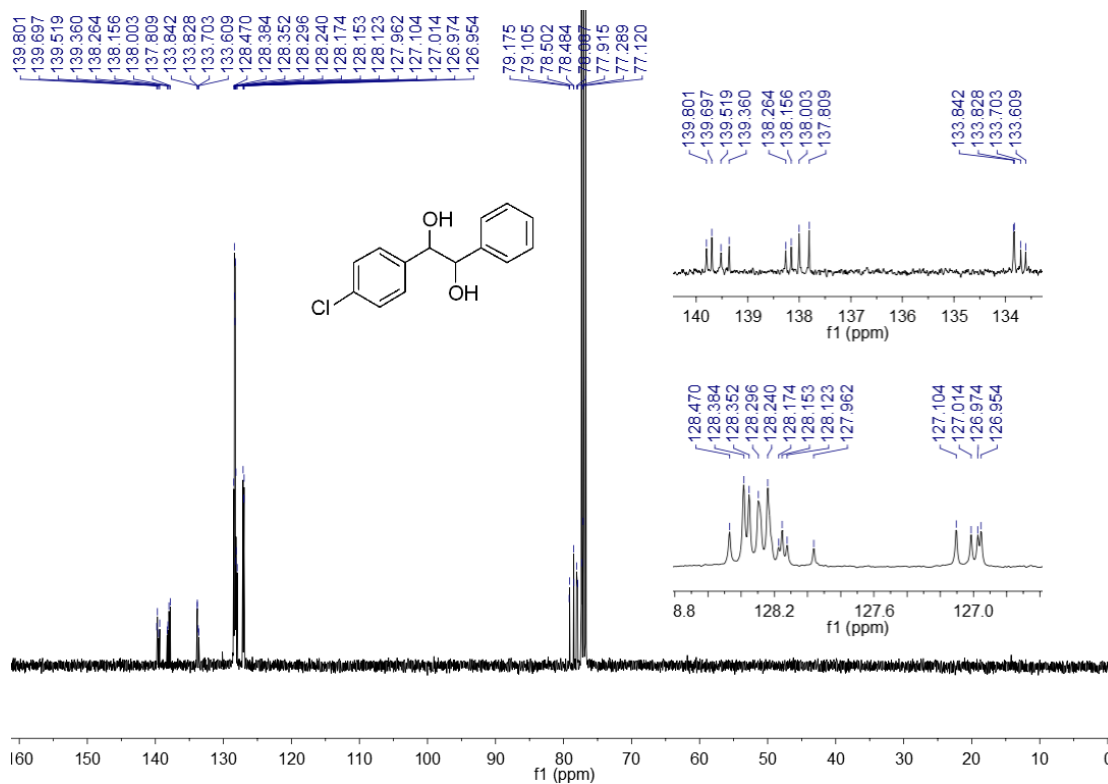



$^1\text{H}$  NMR spectrum of compound **4g** (400 MHz) in  $\text{CDCl}_3$

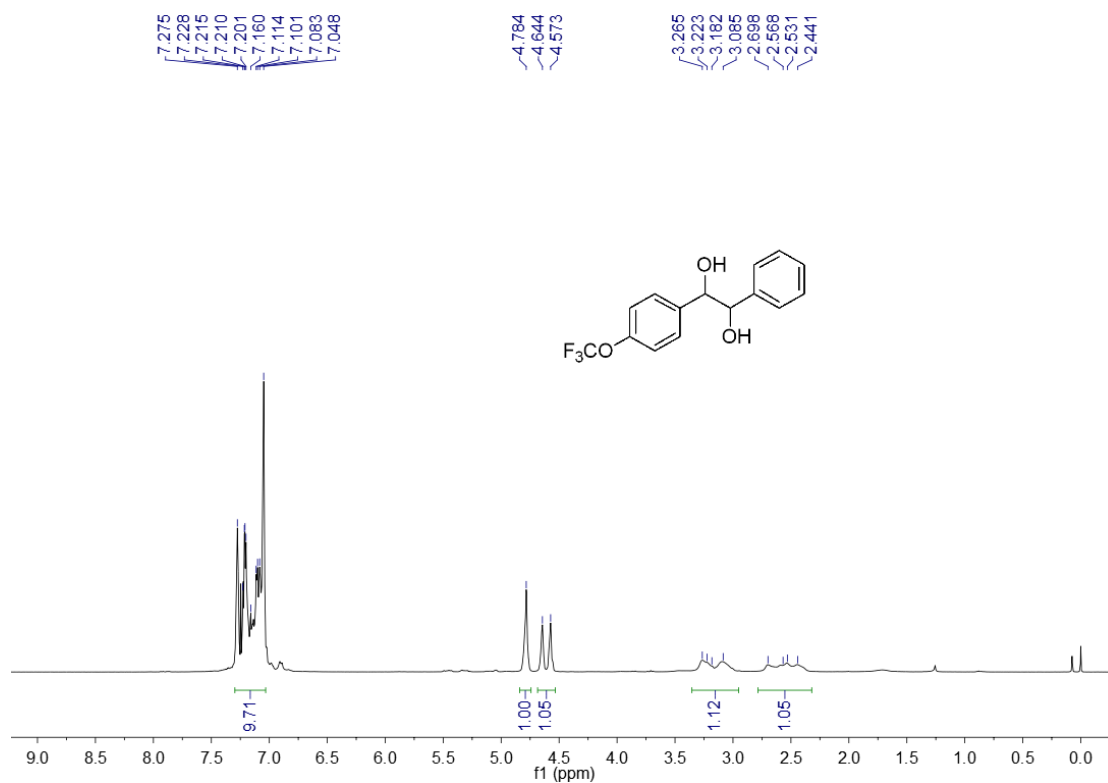

$^{13}\text{C}$  NMR spectrum of compound **4g** (100 MHz) in  $\text{CDCl}_3$

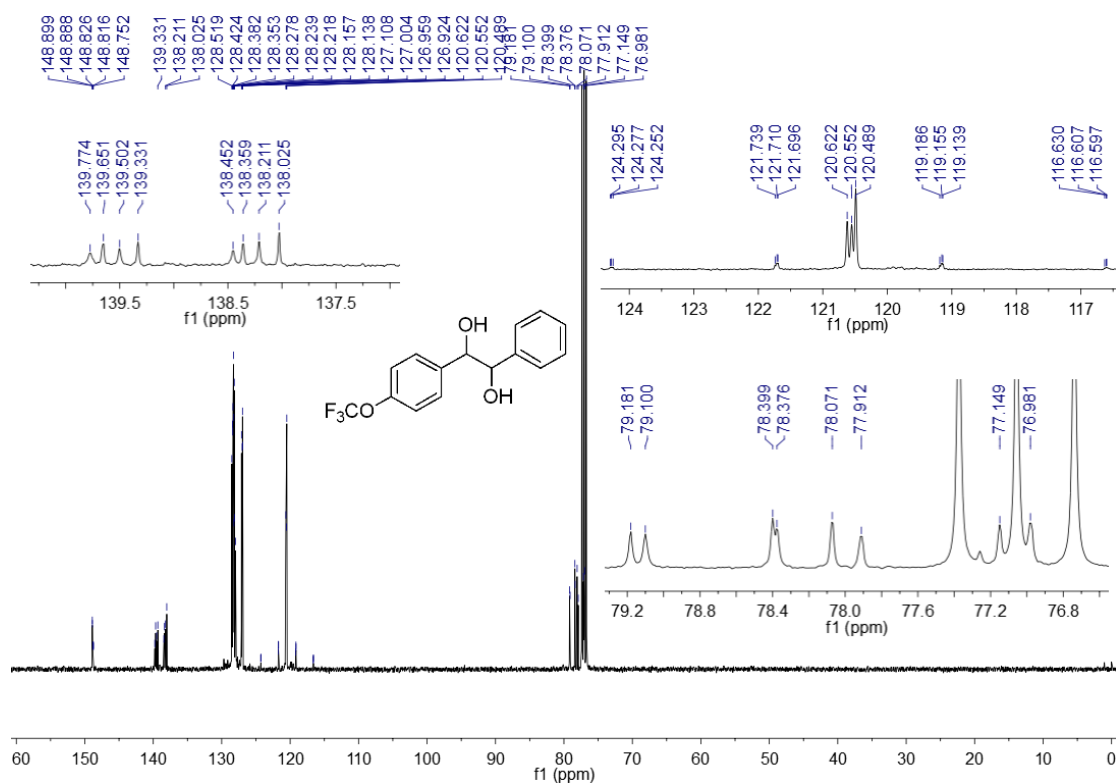



$^{19}\text{F}$  NMR spectrum of compound **4g** (376 MHz) in  $\text{CDCl}_3$

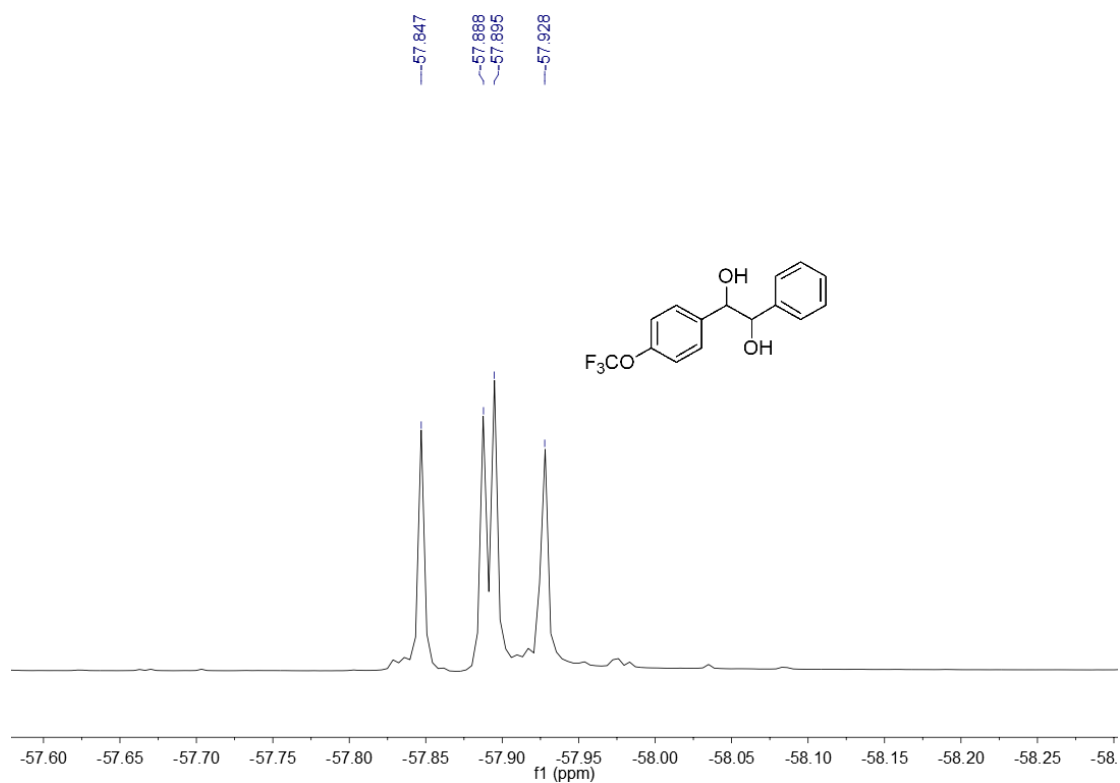

$^1\text{H}$  NMR spectrum of compound **4h** (400 MHz) in  $\text{CDCl}_3$

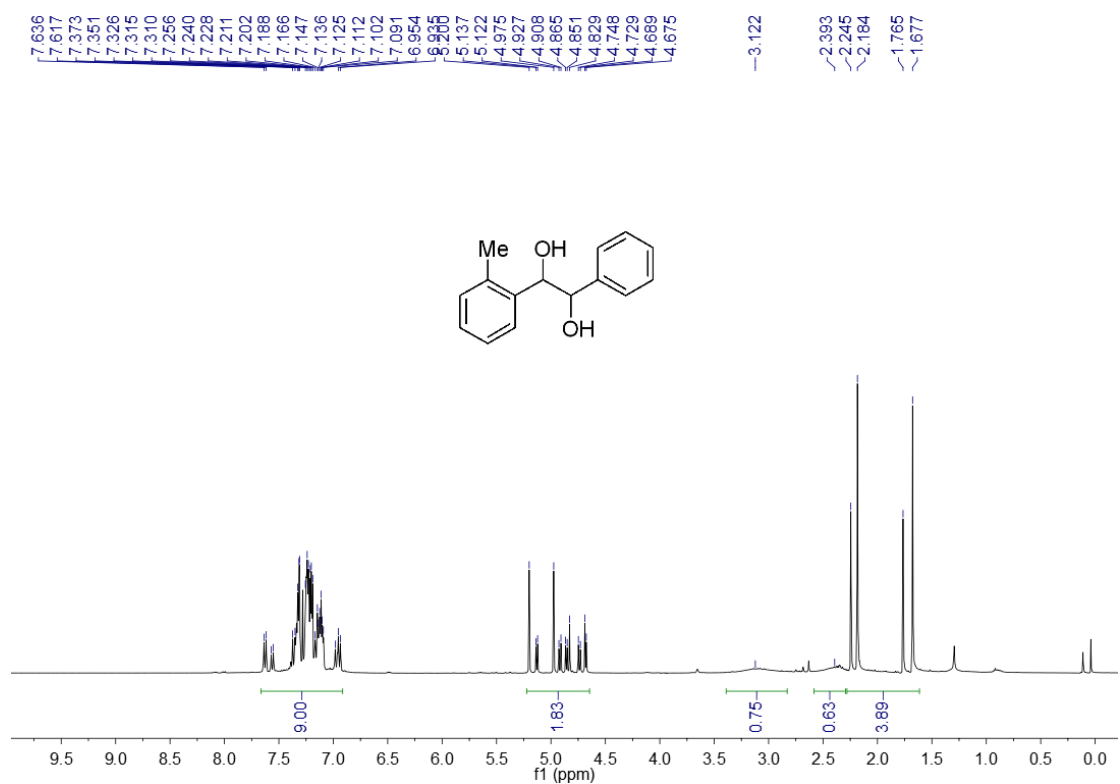



$^{13}\text{C}$  NMR spectrum of compound **4h** (100 MHz) in  $\text{CDCl}_3$

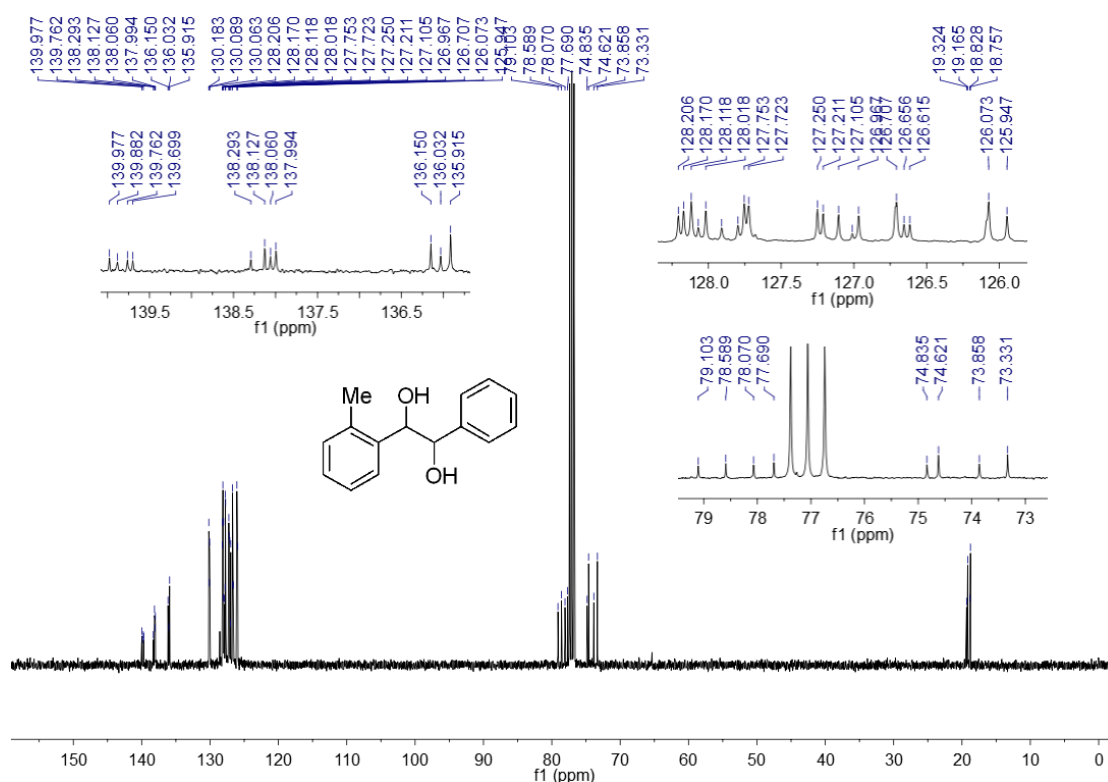

$^1\text{H}$  NMR spectrum of compound **4i** (400 MHz) in  $\text{CDCl}_3$

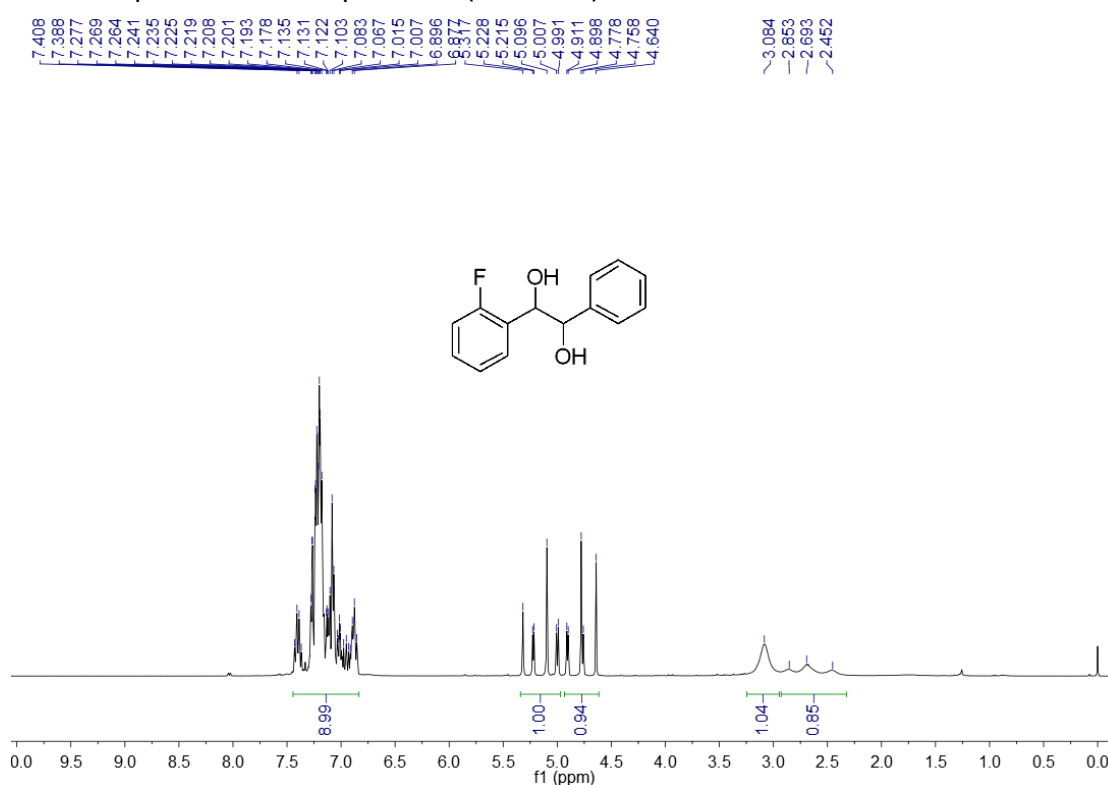



Chemical structure: O[C@H](c1ccccc1)[C@H](O)c2ccccc2F

<sup>13</sup>C NMR spectrum (ppm):

- 161.305, 161.267, 161.200, 161.176, 158.863, 158.824, 158.750, 158.728, 139.828, 139.752, 139.699, 139.272, 128.222, 128.204, 128.137, 128.096, 128.057, 128.057, 128.057, 127.991, 127.935, 127.920, 127.121, 127.073, 126.980, 126.626, 124.162, 124.126, 124.108, 124.022, 123.990, 115.325, 115.281, 115.107, 115.054, 79.110, 78.063, 77.762, 76.916, 72.879, 71.870, 71.463, 70.455

Chemical structure: O[C@H](c1ccccc1)[C@H](O)c2ccccc2F

<sup>1</sup>H NMR spectrum (400 MHz, DMSO-d<sub>6</sub>) showing peaks at the following chemical shifts (ppm):

- 7.18105
- 7.18156
- 7.18459
- 7.18605



$^1\text{H}$  NMR spectrum of compound **4j** (400 MHz) in  $\text{CDCl}_3$

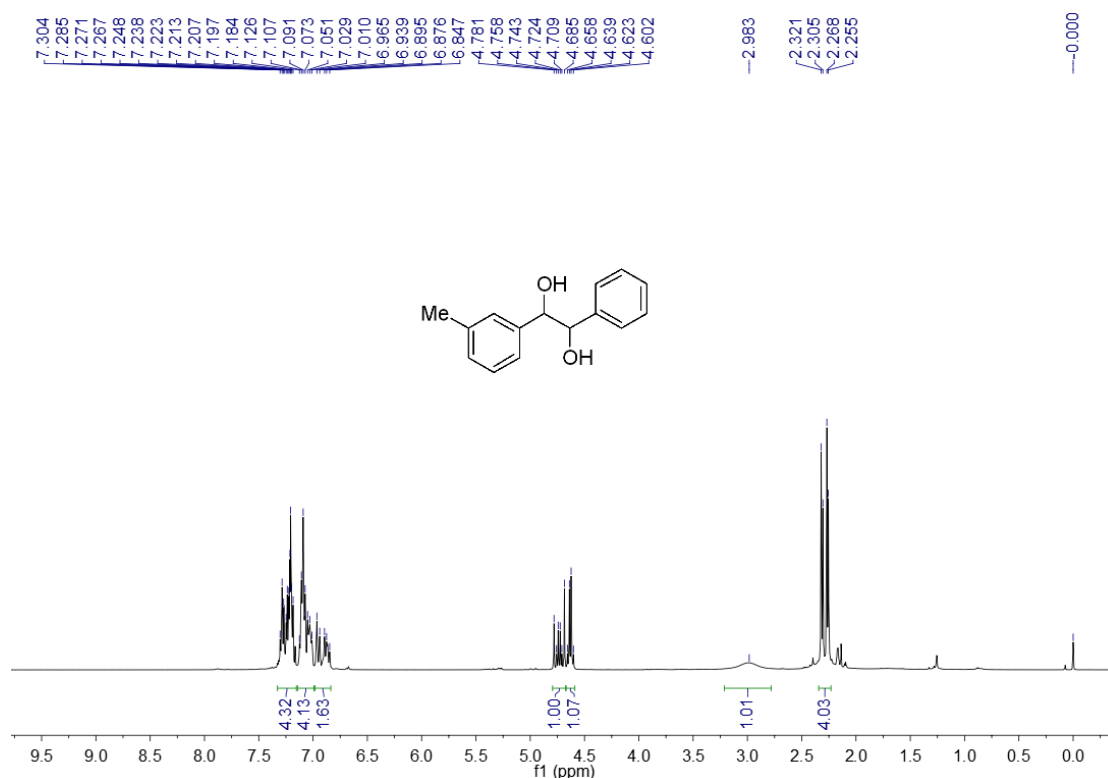

$^{13}\text{C}$  NMR spectrum of compound **4j** (100 MHz) in  $\text{CDCl}_3$

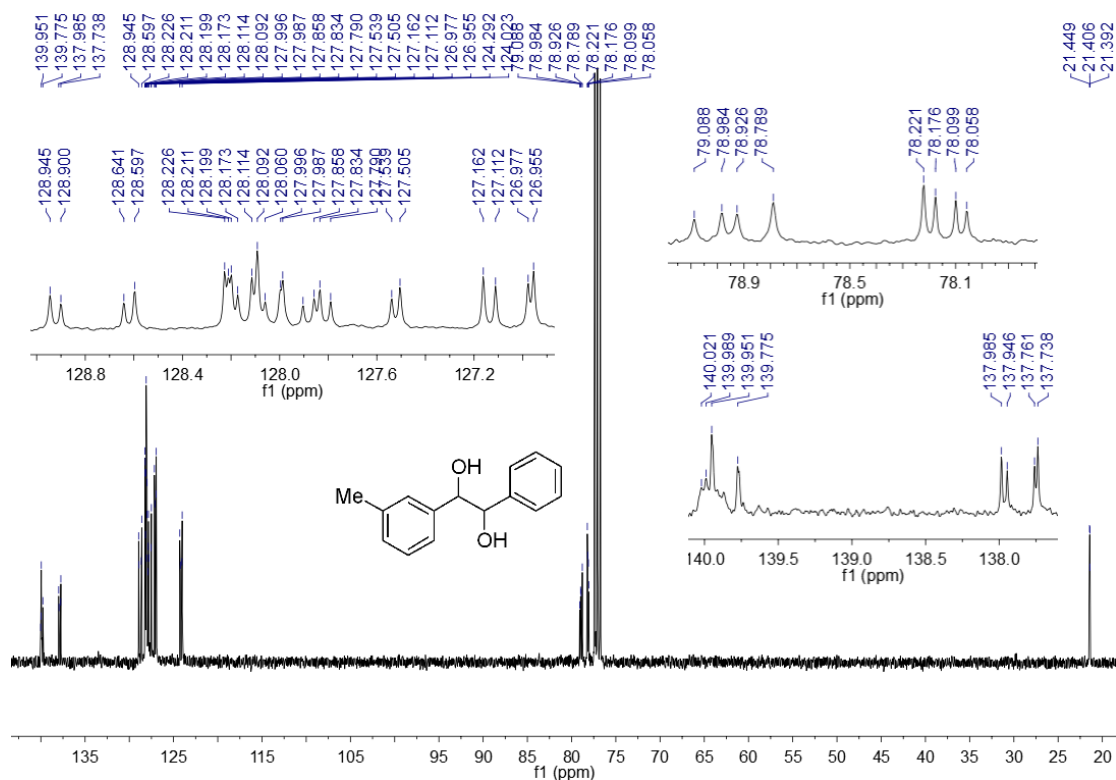



$^1\text{H}$  NMR spectrum of compound **4k** (400 MHz) in  $\text{CDCl}_3$

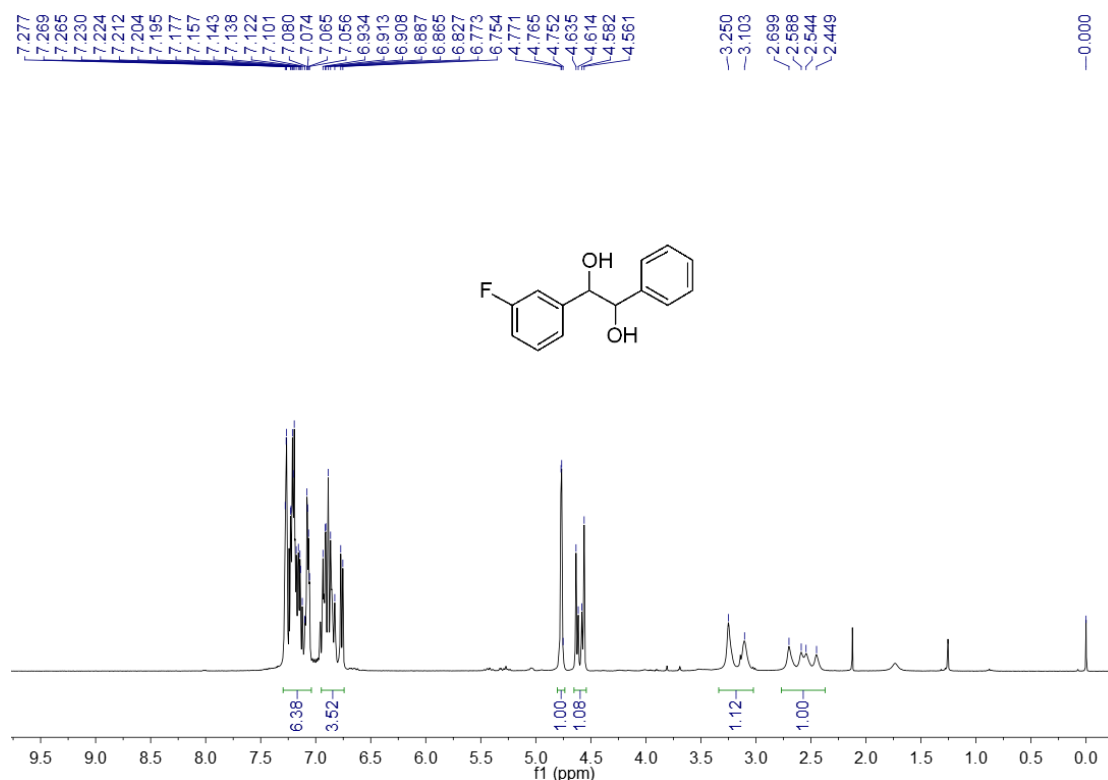

$^{13}\text{C}$  NMR spectrum of compound **4k** (100 MHz) in  $\text{CDCl}_3$

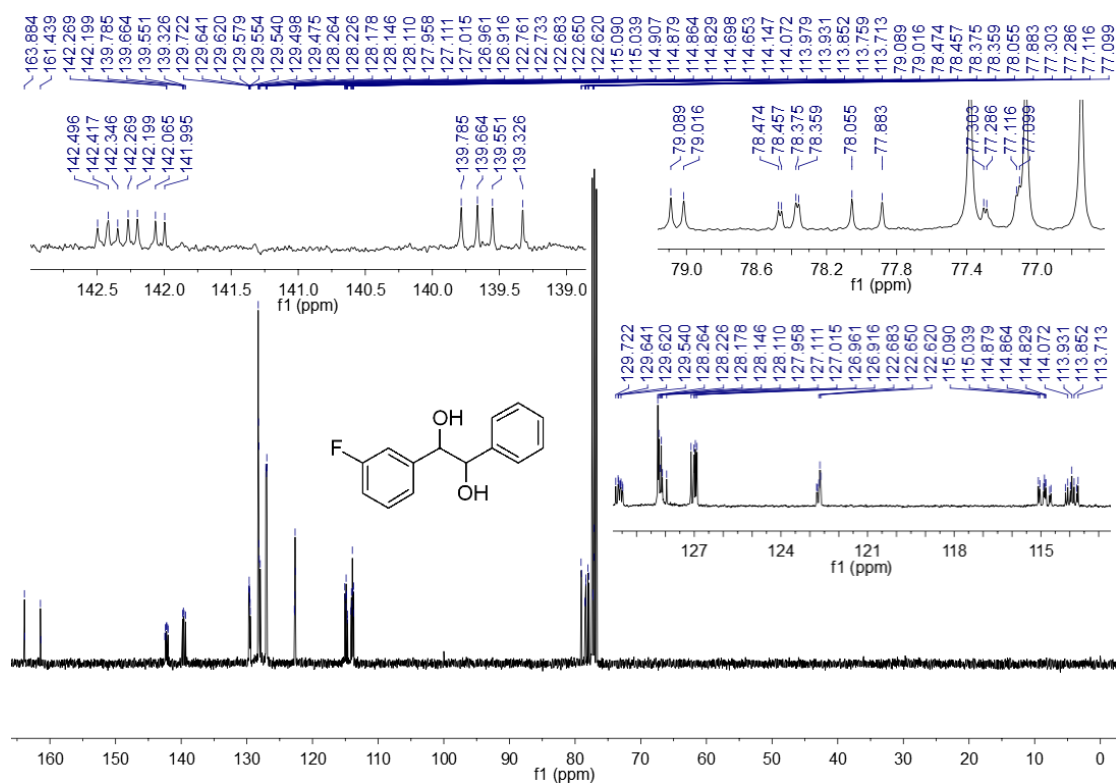



$^{19}\text{F}$  NMR spectrum of compound **4k** (376 MHz) in  $\text{CDCl}_3$

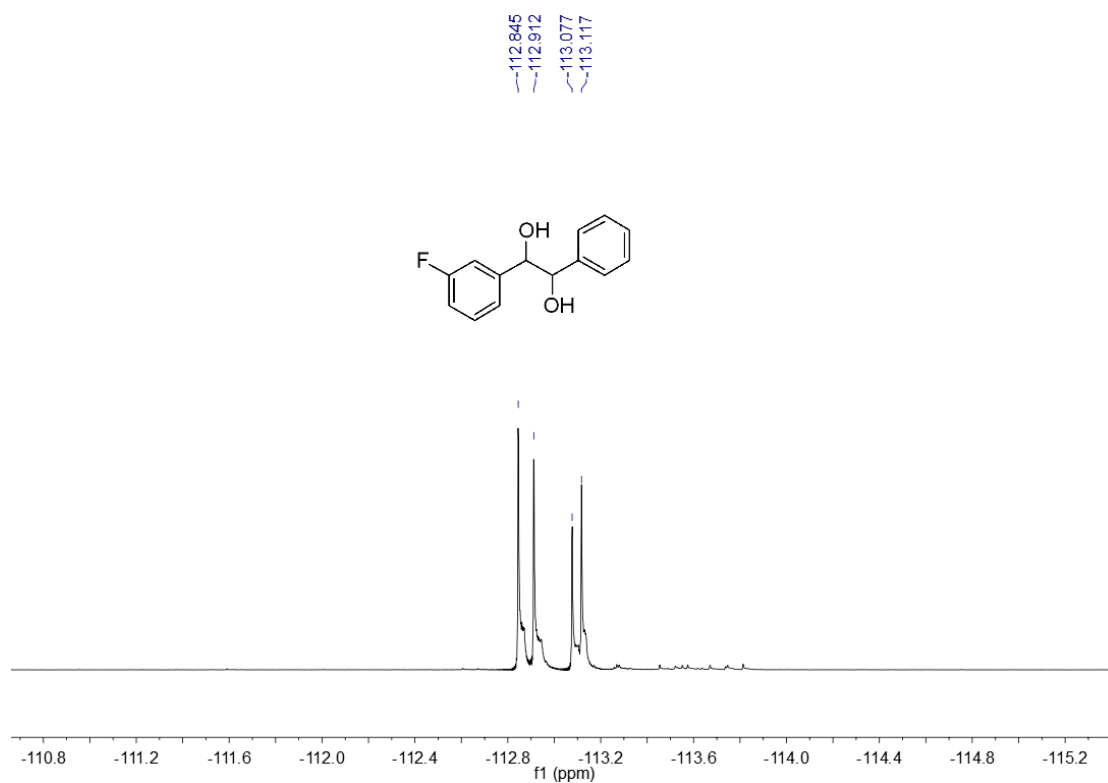

$^1\text{H}$  NMR spectrum of compound **4l** (400 MHz) in  $\text{CDCl}_3$

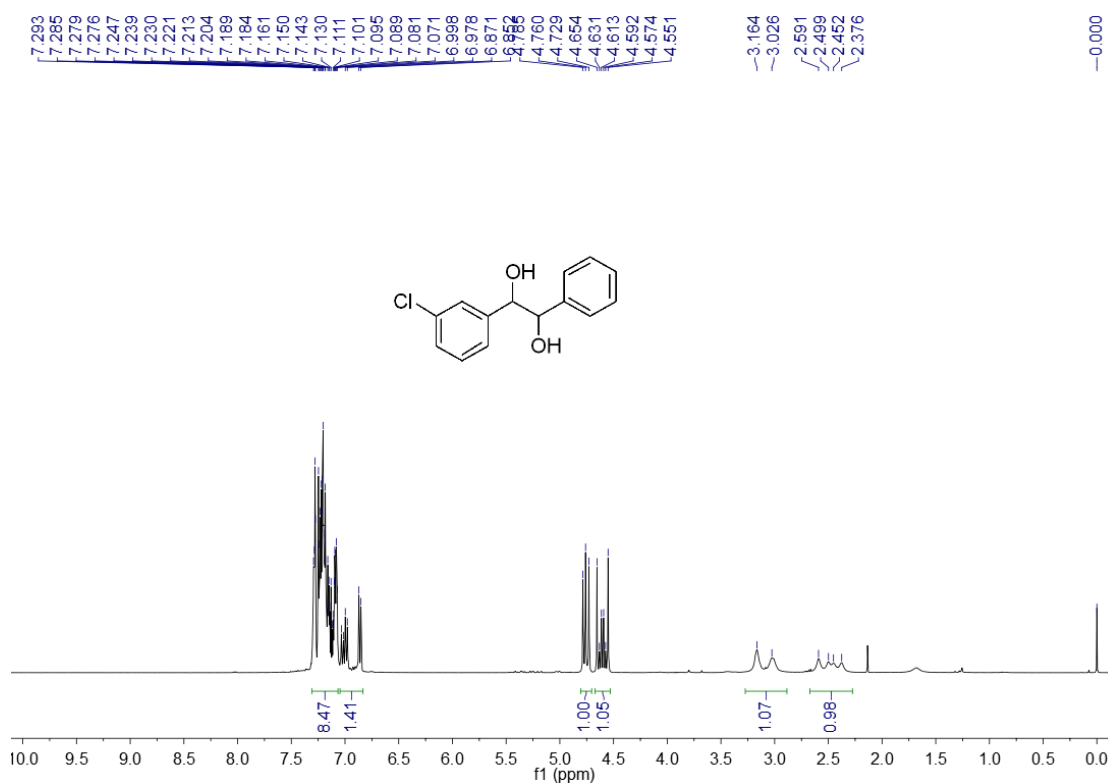



$^{13}\text{C}$  NMR spectrum of compound **4l** (100 MHz) in  $\text{CDCl}_3$

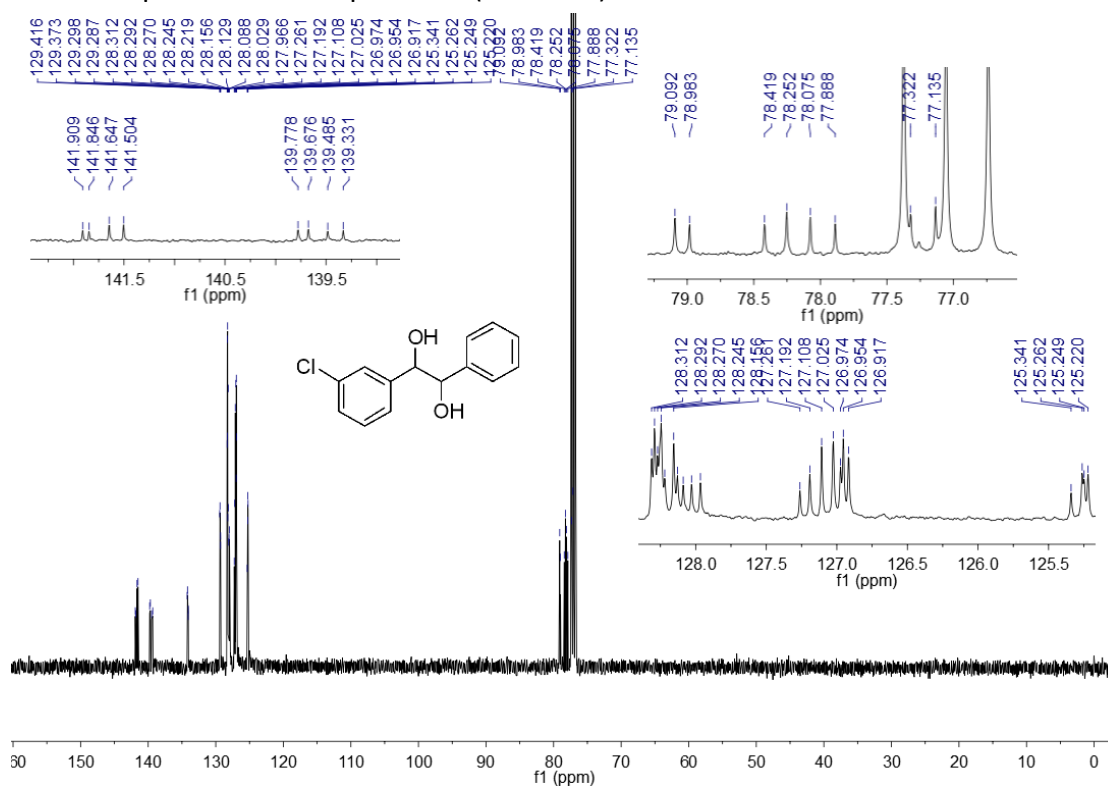

$^1\text{H}$  NMR spectrum of compound **4m** (400 MHz) in  $\text{CDCl}_3$

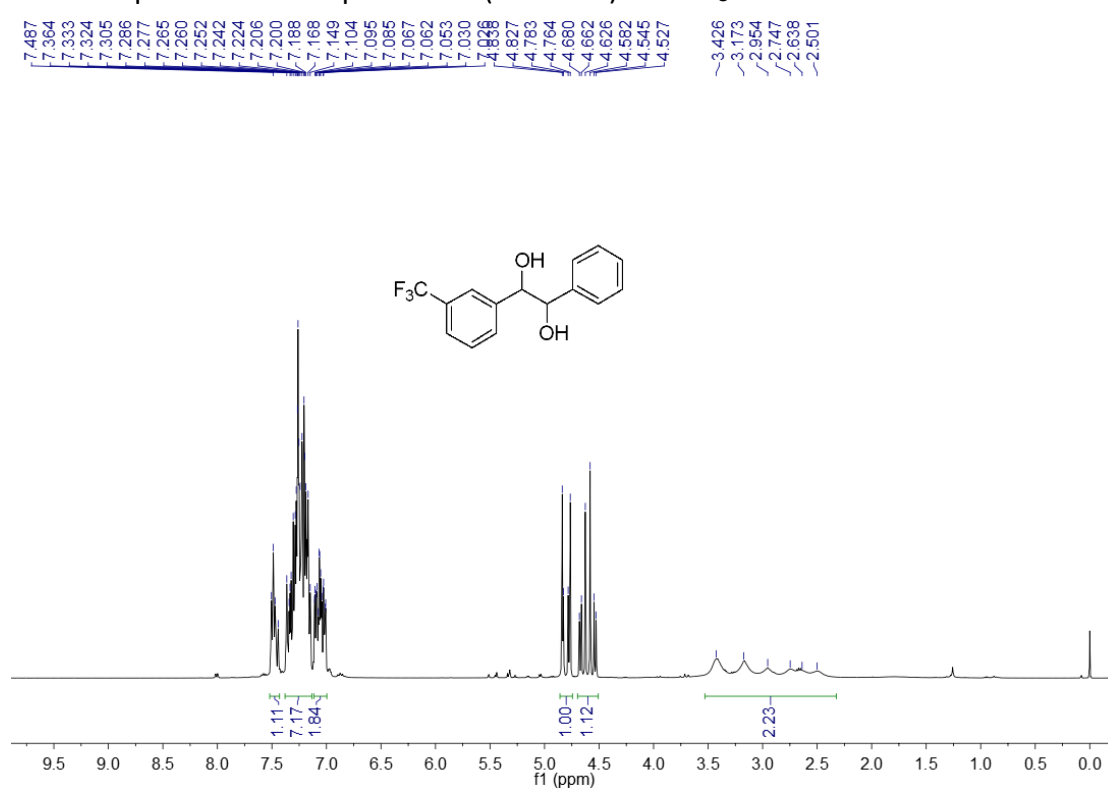



$^{13}\text{C}$  NMR spectrum of compound **4m** (100 MHz) in  $\text{CDCl}_3$

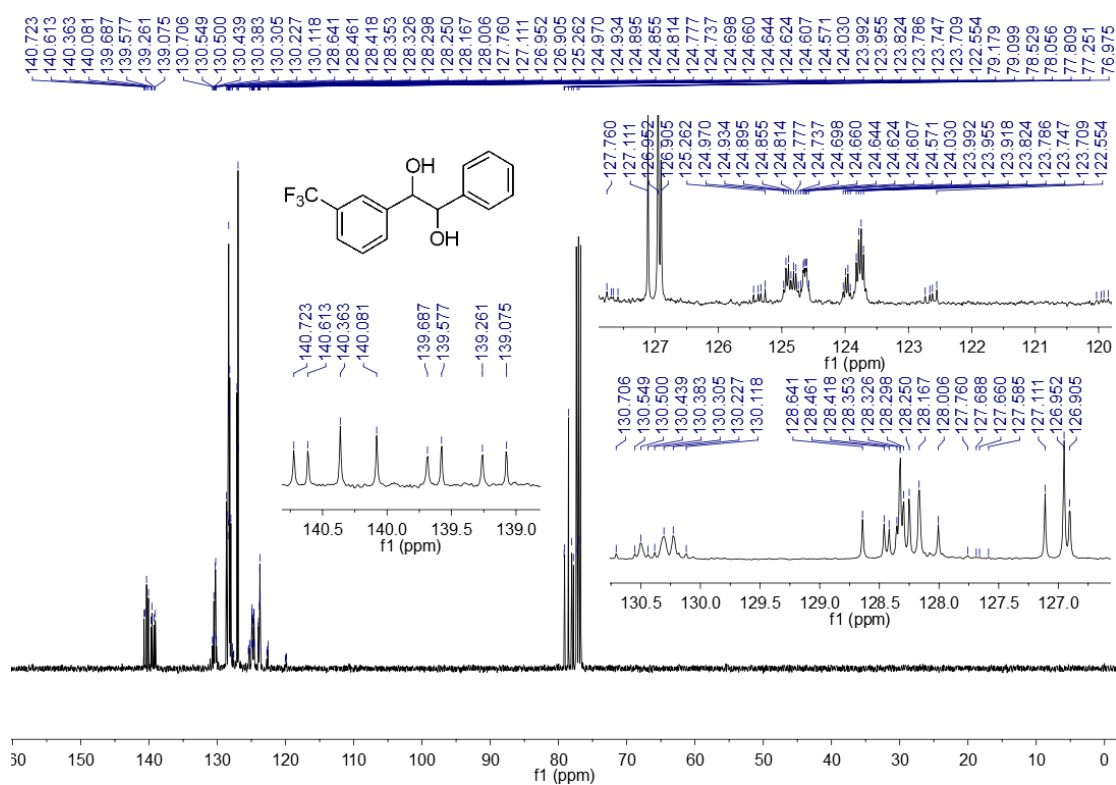

$^{19}\text{F}$  NMR spectrum of compound **4m** (376 MHz) in  $\text{CDCl}_3$

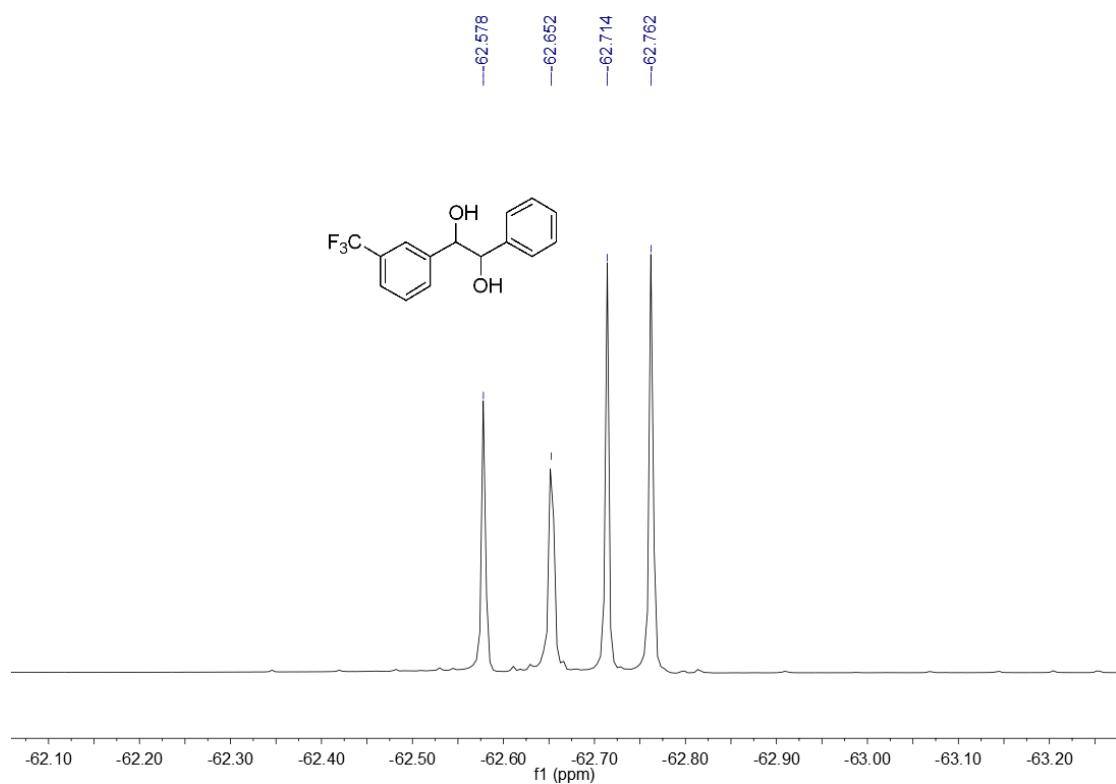



$^1\text{H}$  NMR spectrum of compound **4n** (400 MHz) in  $\text{CDCl}_3$

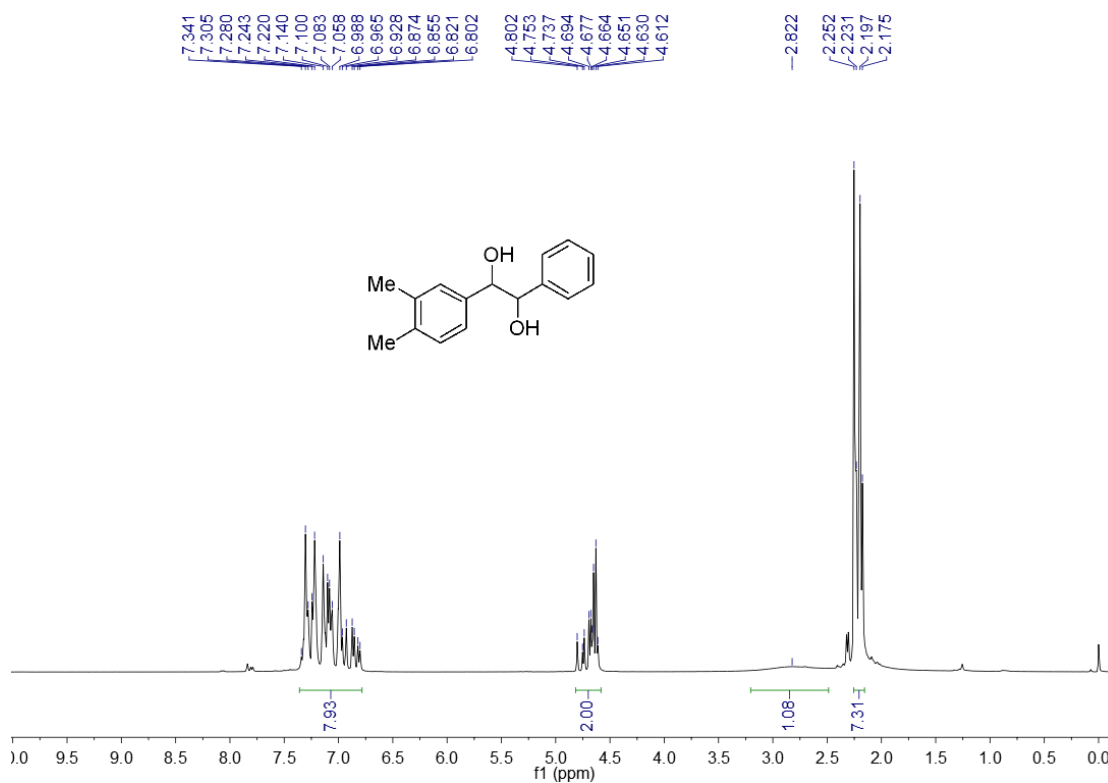

$^{13}\text{C}$  NMR spectrum of compound **4n** (100 MHz) in  $\text{CDCl}_3$

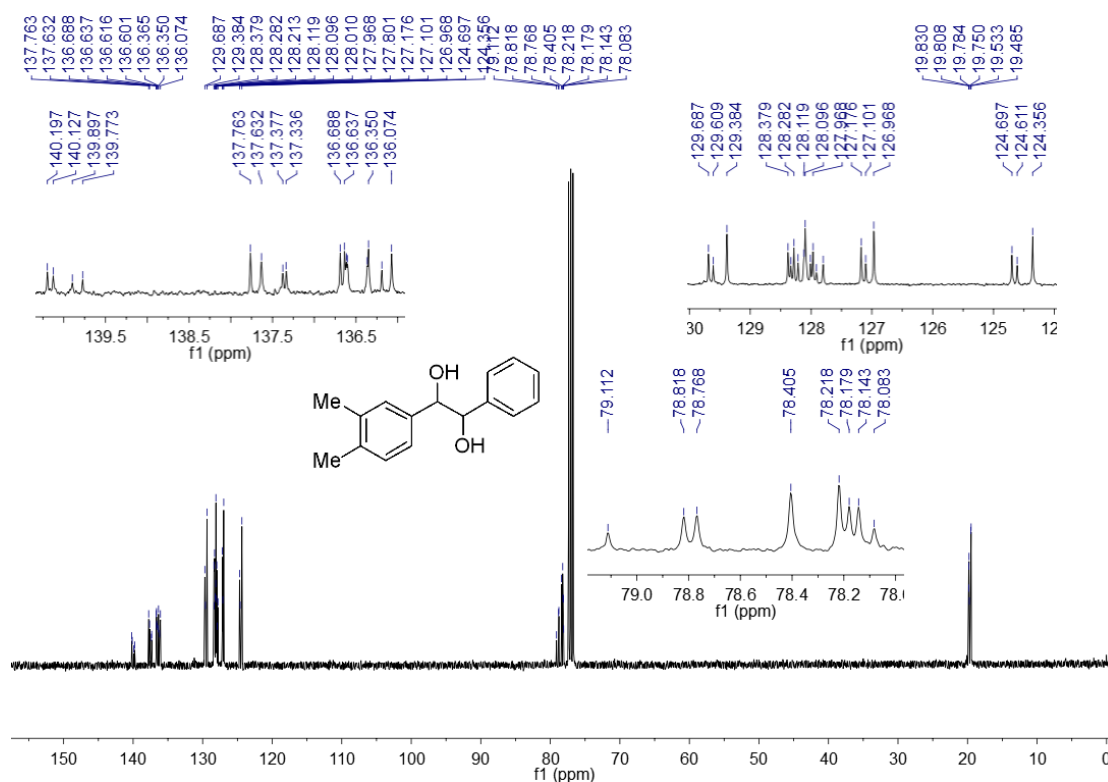



$^1\text{H}$  NMR spectrum of compound **4o** (400 MHz) in  $\text{CDCl}_3$

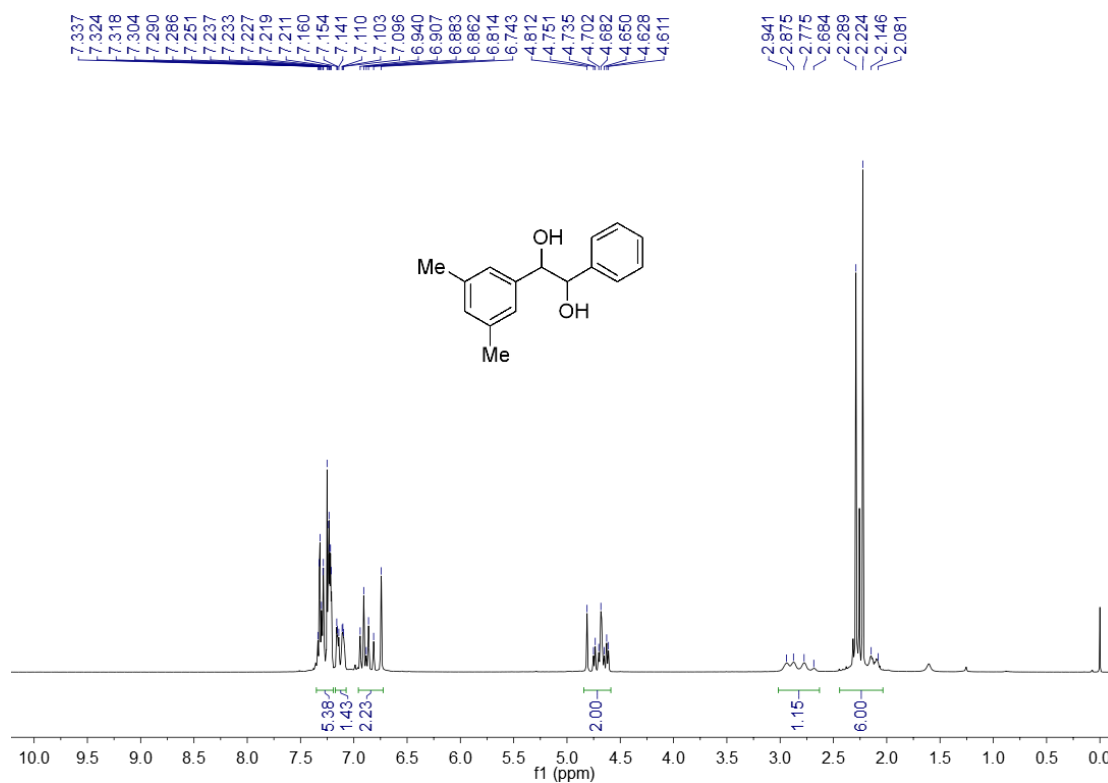

$^{13}\text{C}$  NMR spectrum of compound **4o** (100 MHz) in  $\text{CDCl}_3$

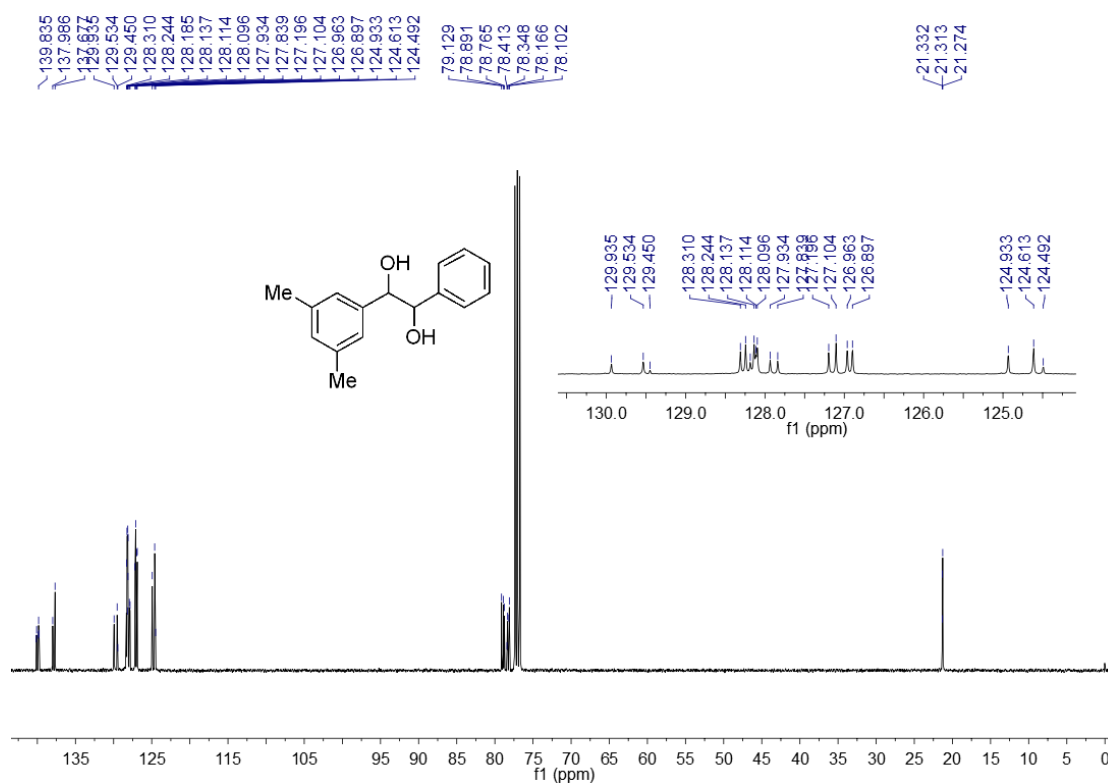



$^1\text{H}$  NMR spectrum of compound **4p** (400 MHz) in  $\text{CDCl}_3$

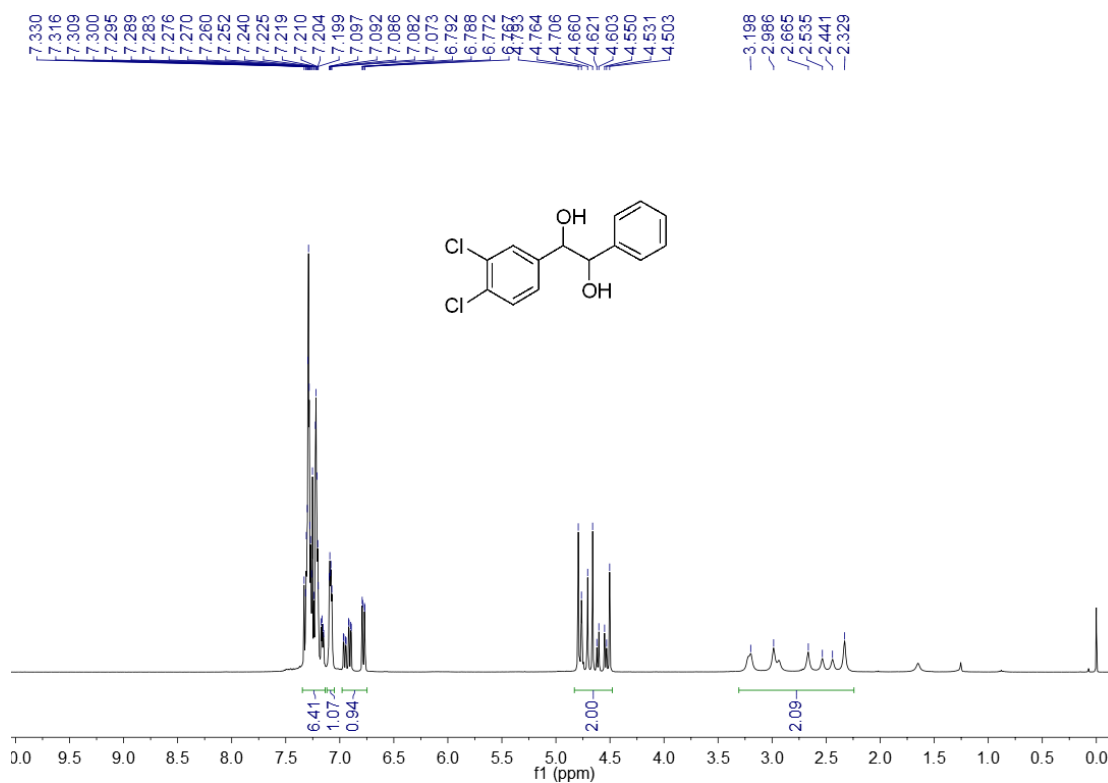

$^{13}\text{C}$  NMR spectrum of compound **4p** (100 MHz) in  $\text{CDCl}_3$

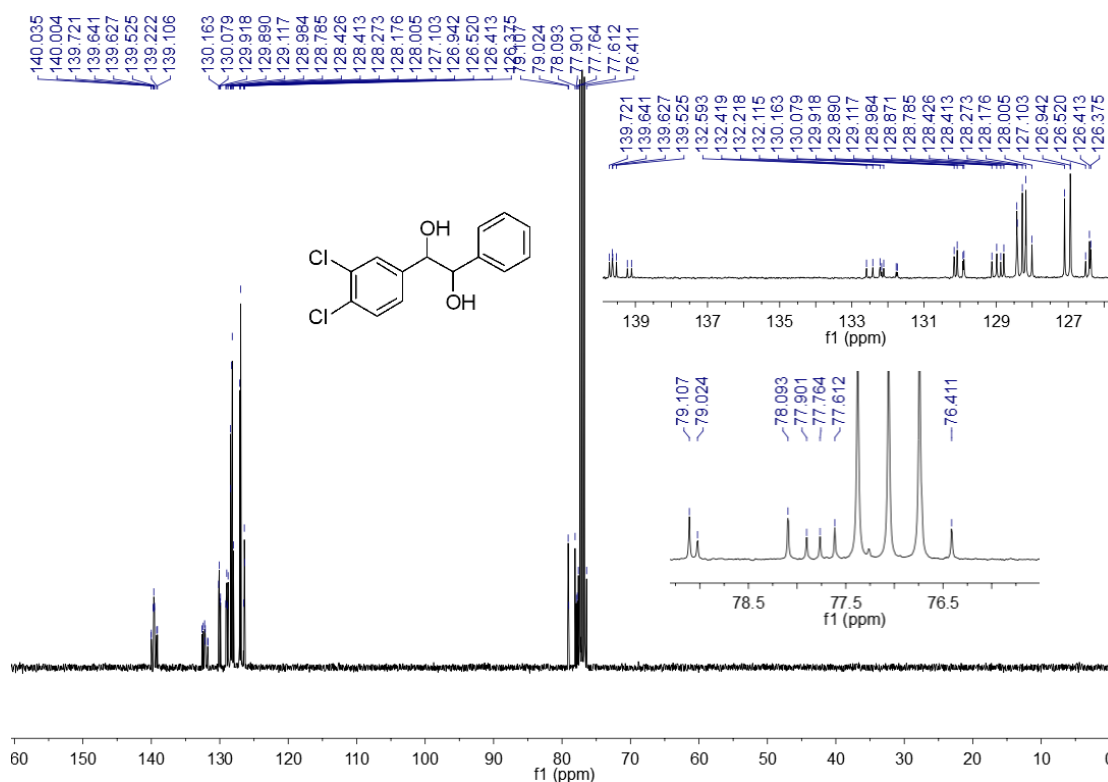



$^1\text{H}$  NMR spectrum of compound **5a** (400 MHz) in  $\text{CDCl}_3$

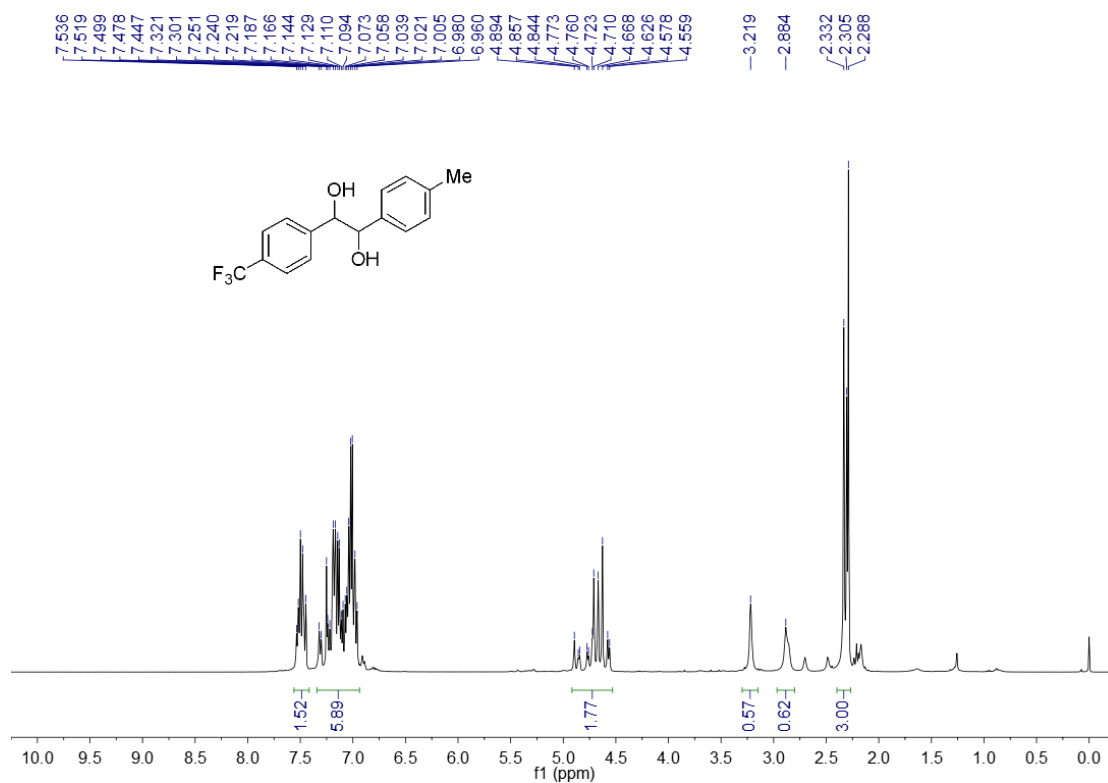

$^{13}\text{C}$  NMR spectrum of compound **5a** (100 MHz) in  $\text{CDCl}_3$

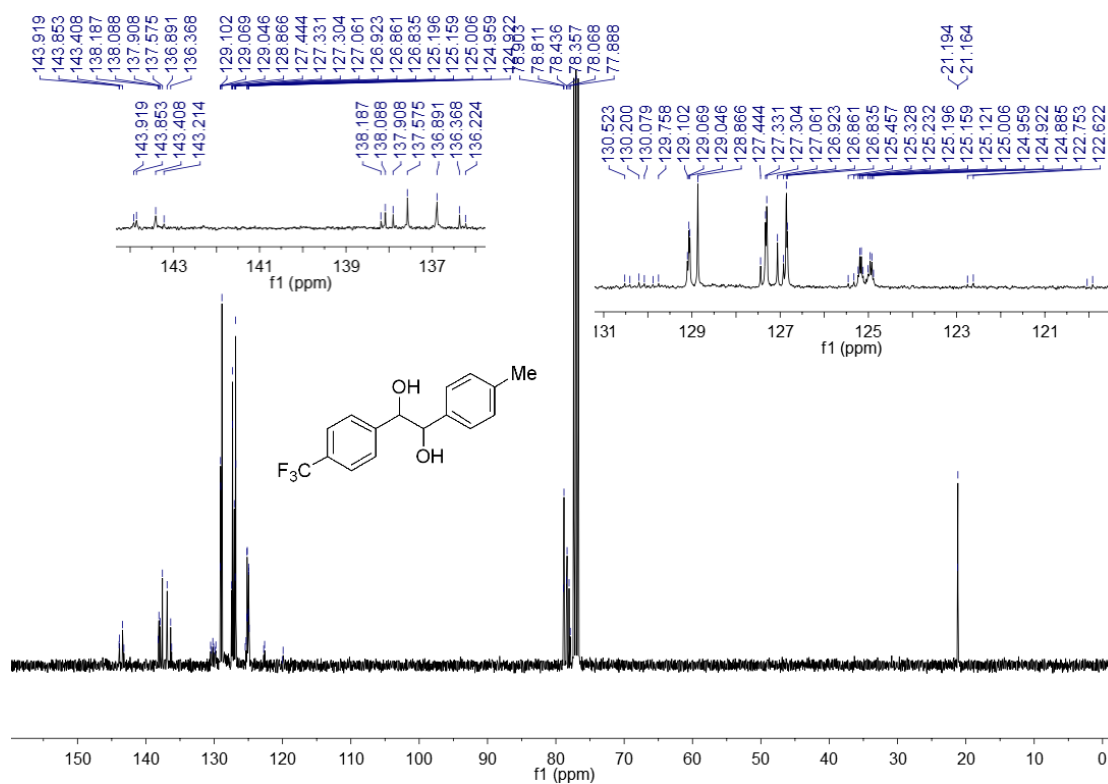



$^{19}\text{F}$  NMR spectrum of compound **5a** (376 MHz) in  $\text{CDCl}_3$

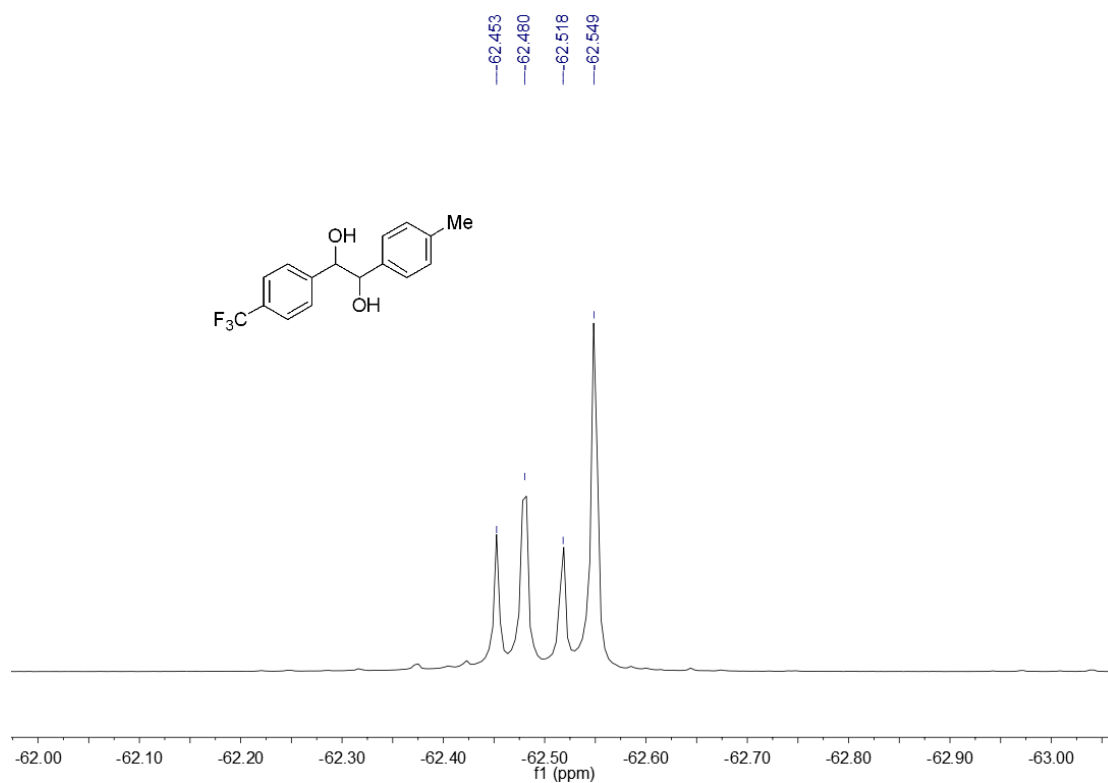

$^1\text{H}$  NMR spectrum of compound **5b** (400 MHz) in  $\text{CDCl}_3$

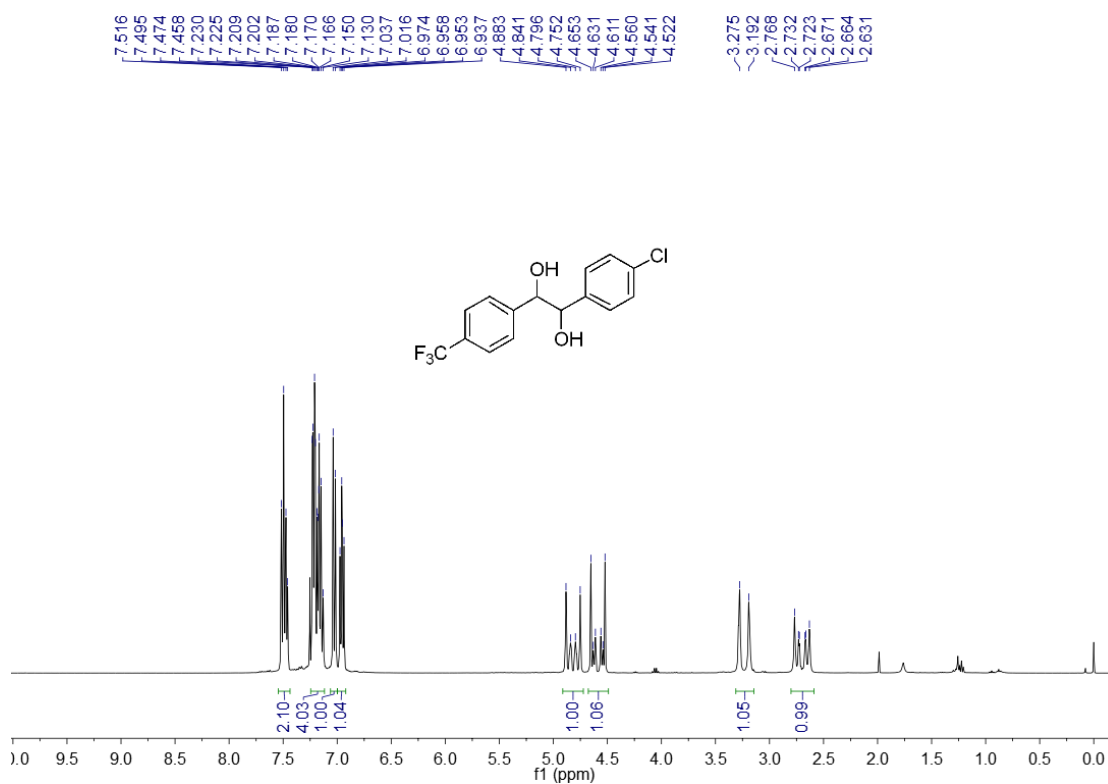



$^{13}\text{C}$  NMR spectrum of compound **5b** (100 MHz) in  $\text{CDCl}_3$

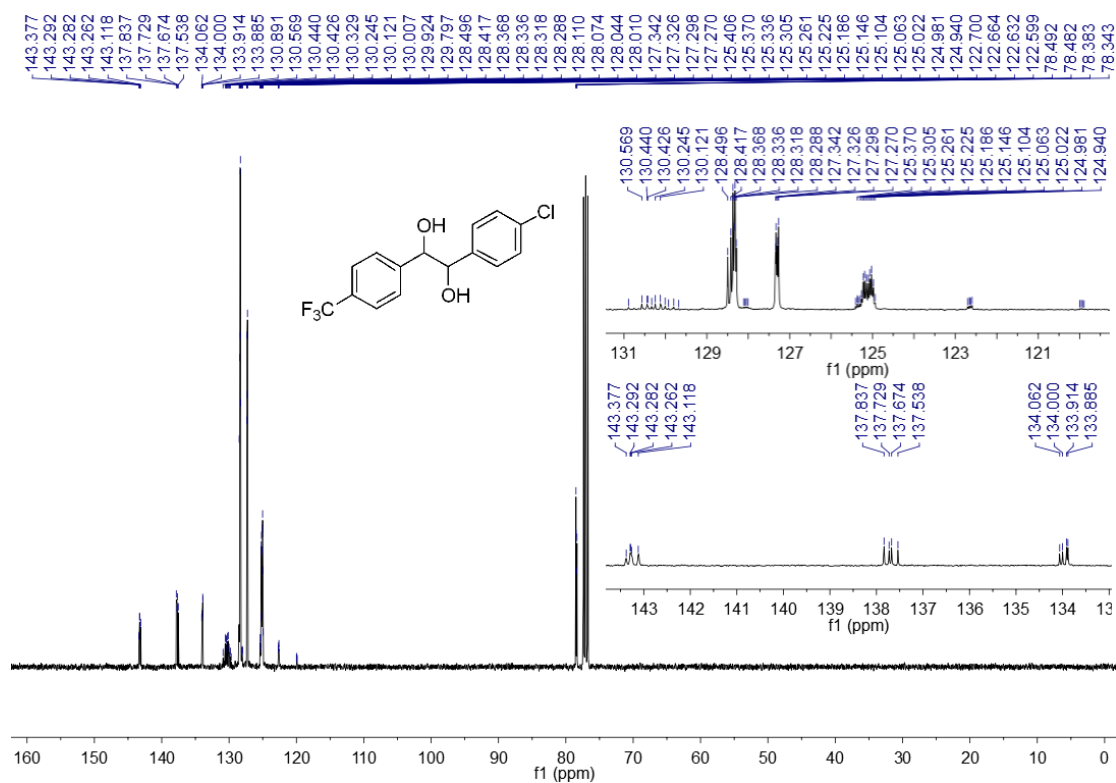

$^{19}\text{F}$  NMR spectrum of compound **5b** (376 MHz) in  $\text{CDCl}_3$

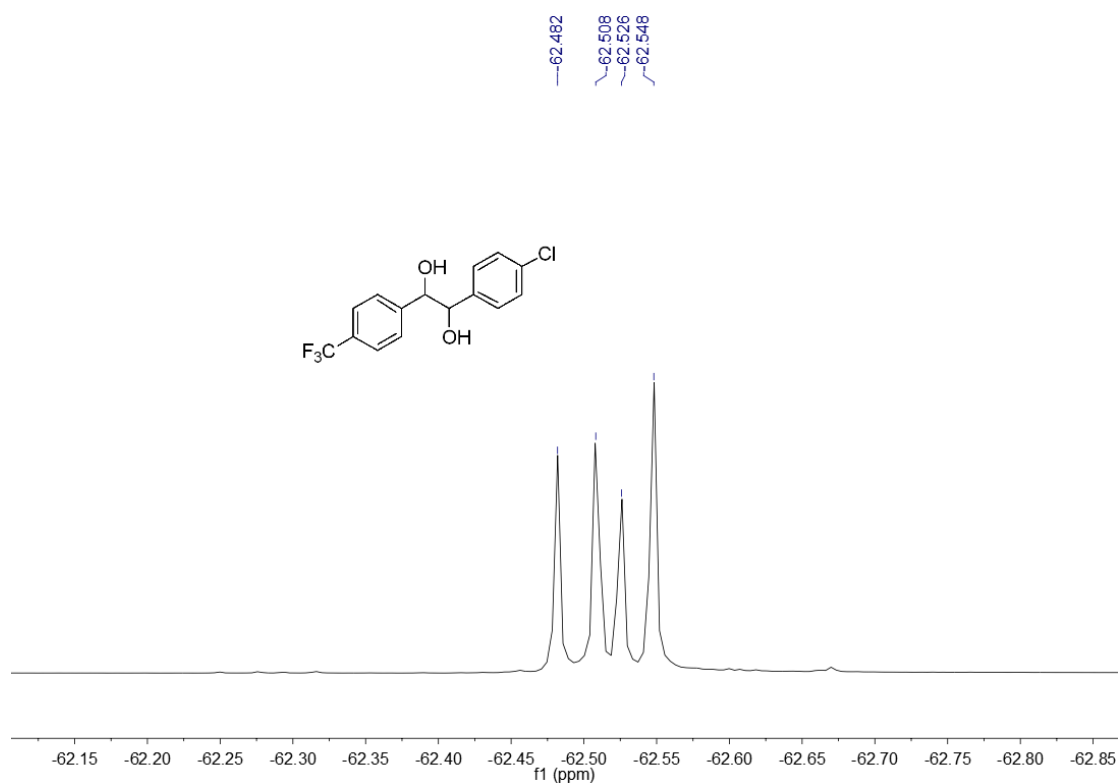



$^1\text{H}$  NMR spectrum of compound **5c** (400 MHz) in  $\text{CDCl}_3$

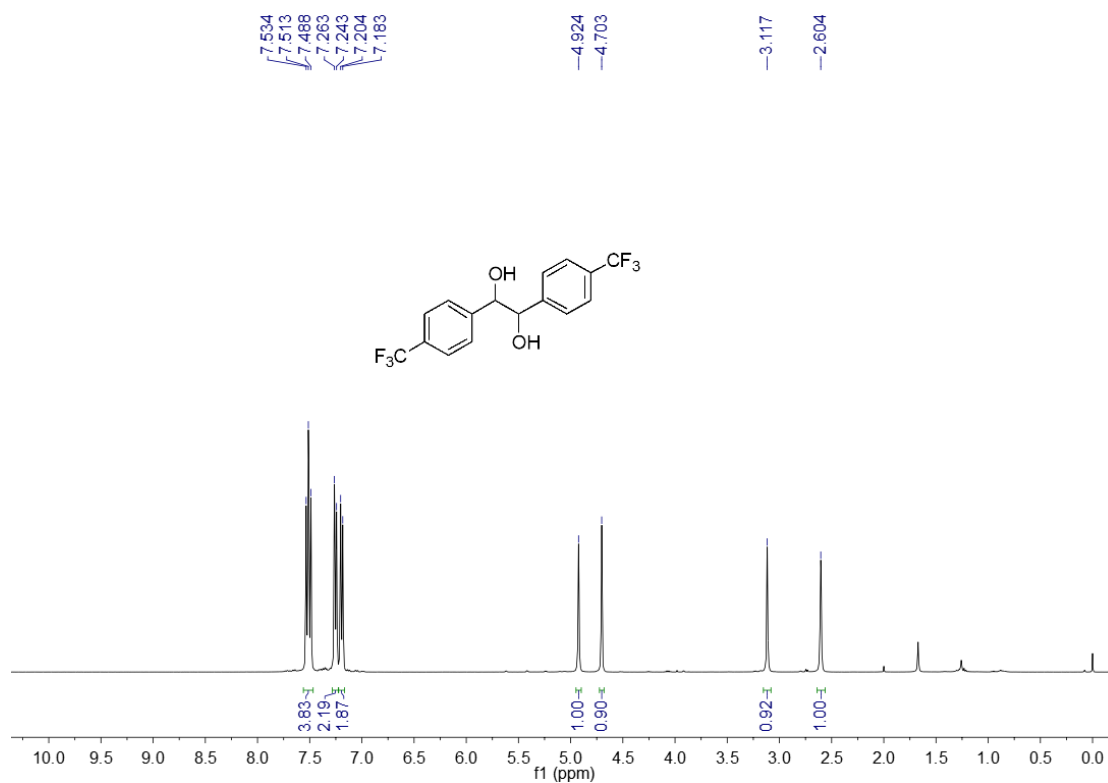

$^{13}\text{C}$  NMR spectrum of compound **5c** (100 MHz) in  $\text{CDCl}_3$

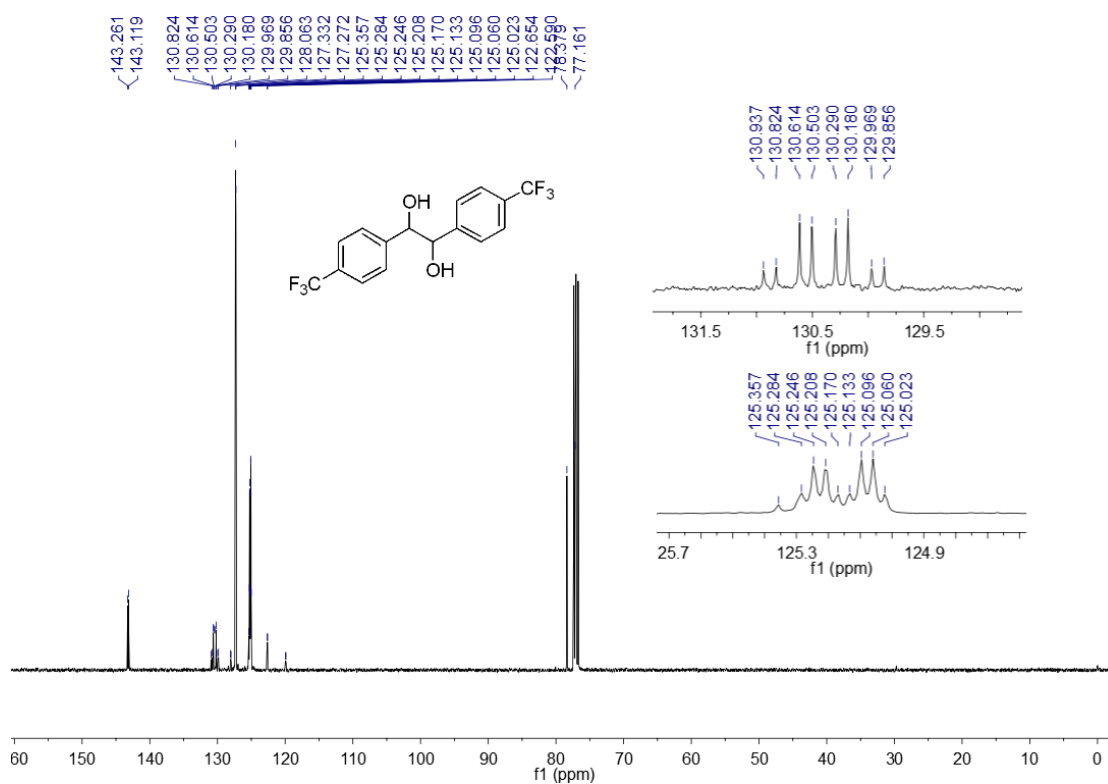



$^{19}\text{F}$  NMR spectrum of compound **5c** (376 MHz) in  $\text{CDCl}_3$

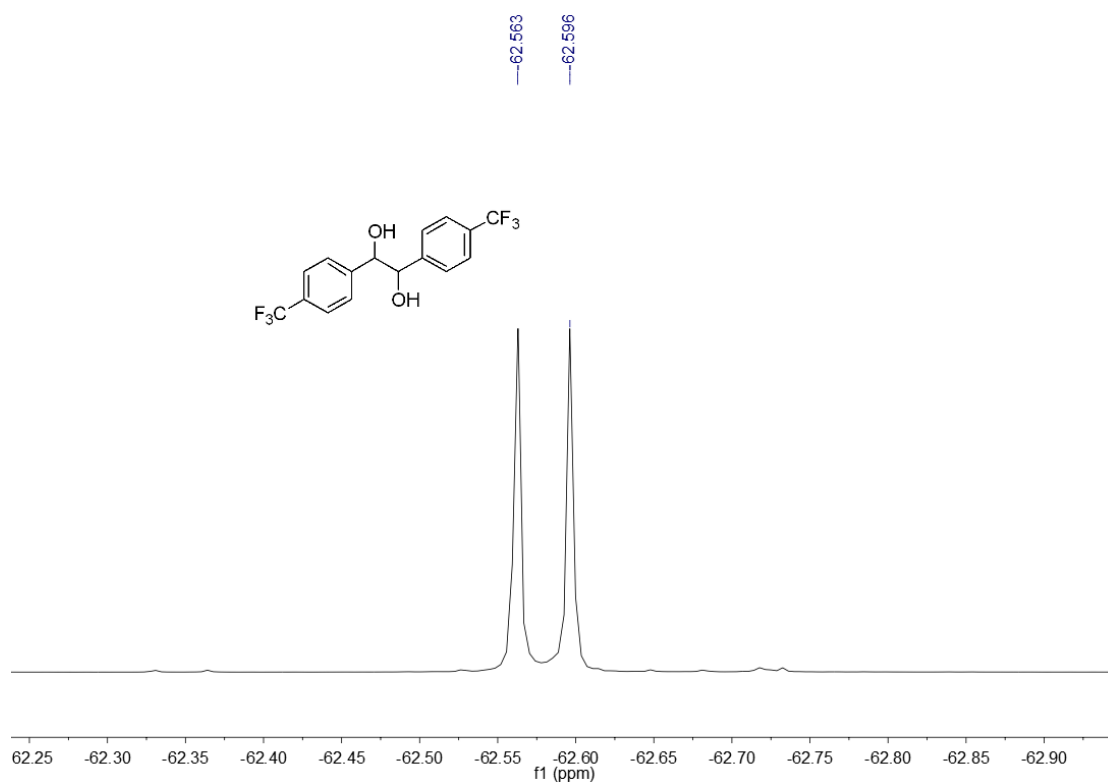

$^1\text{H}$  NMR spectrum of compound **5d** (400 MHz) in  $\text{CDCl}_3$

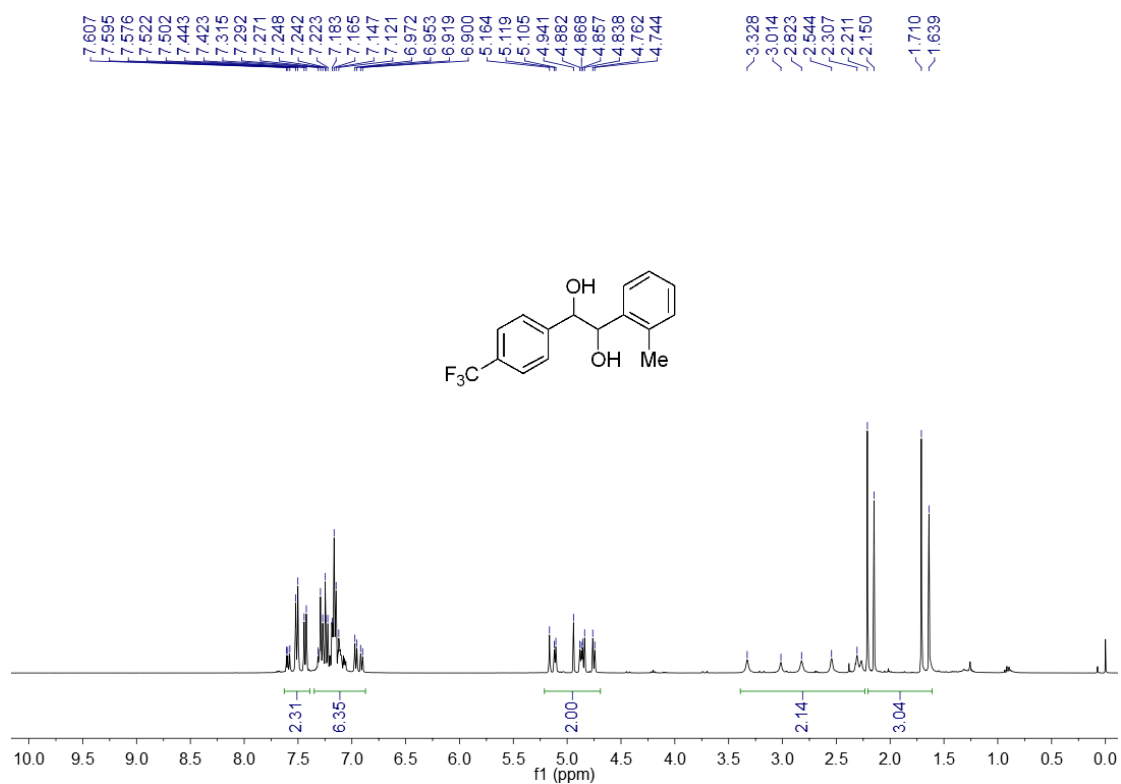



$^{13}\text{C}$  NMR spectrum of compound **5d** (100 MHz) in  $\text{CDCl}_3$

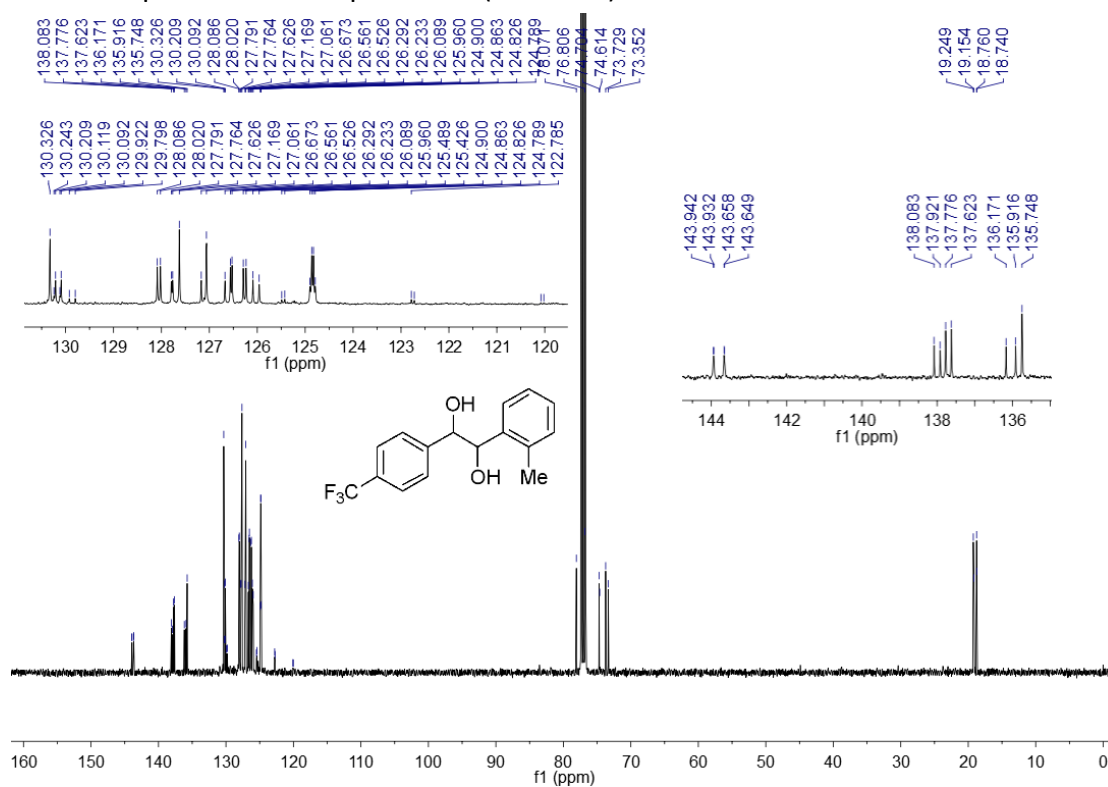

$^{19}\text{F}$  NMR spectrum of compound **5d** (376 MHz) in  $\text{CDCl}_3$

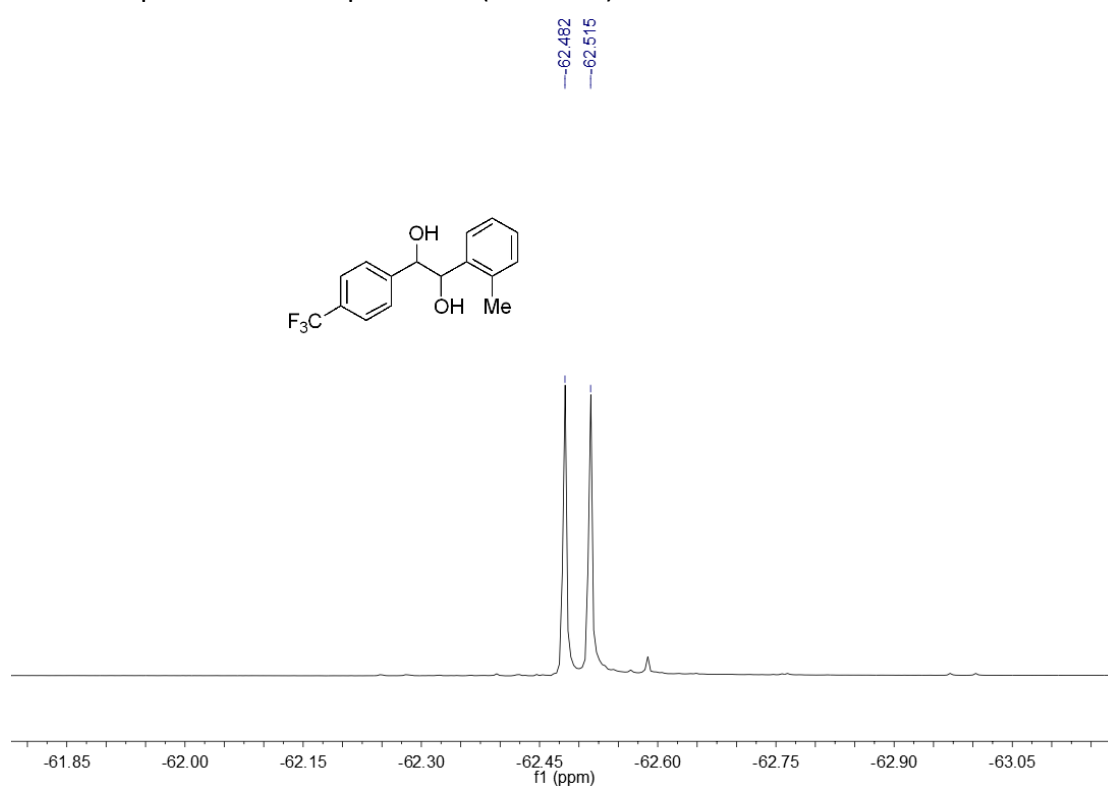



$^1\text{H}$  NMR spectrum of compound **5e** (400 MHz) in  $\text{CDCl}_3$

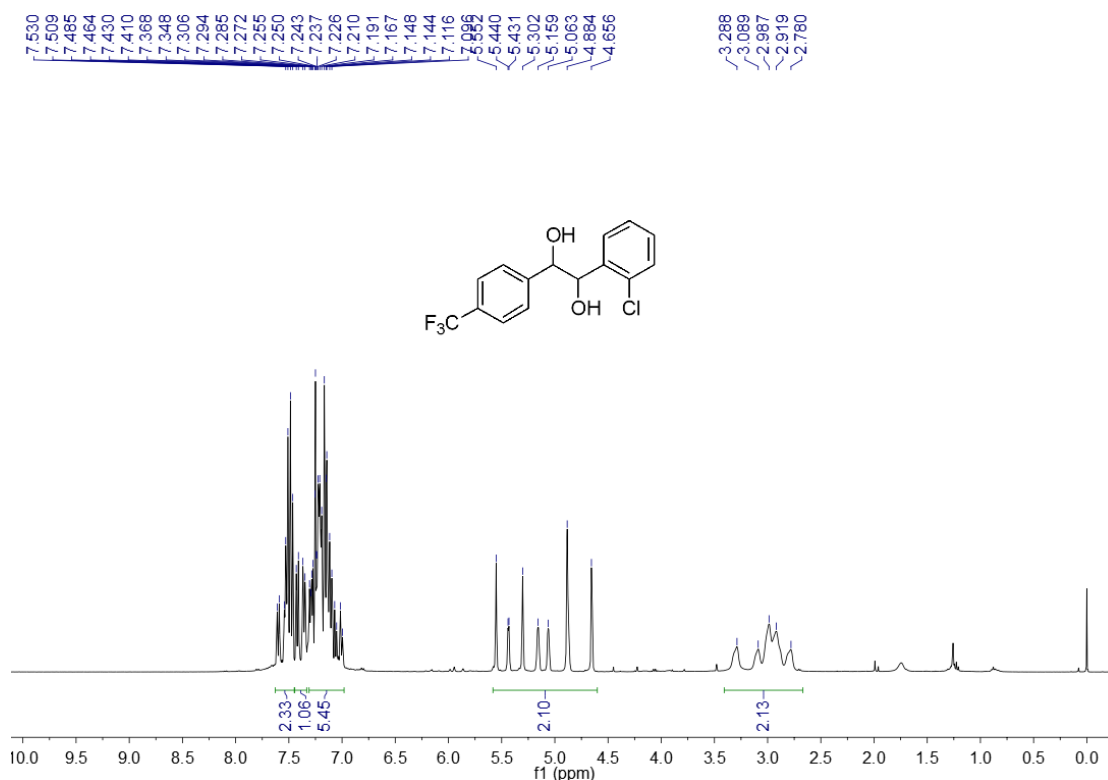

$^{13}\text{C}$  NMR spectrum of compound **5e** (100 MHz) in  $\text{CDCl}_3$

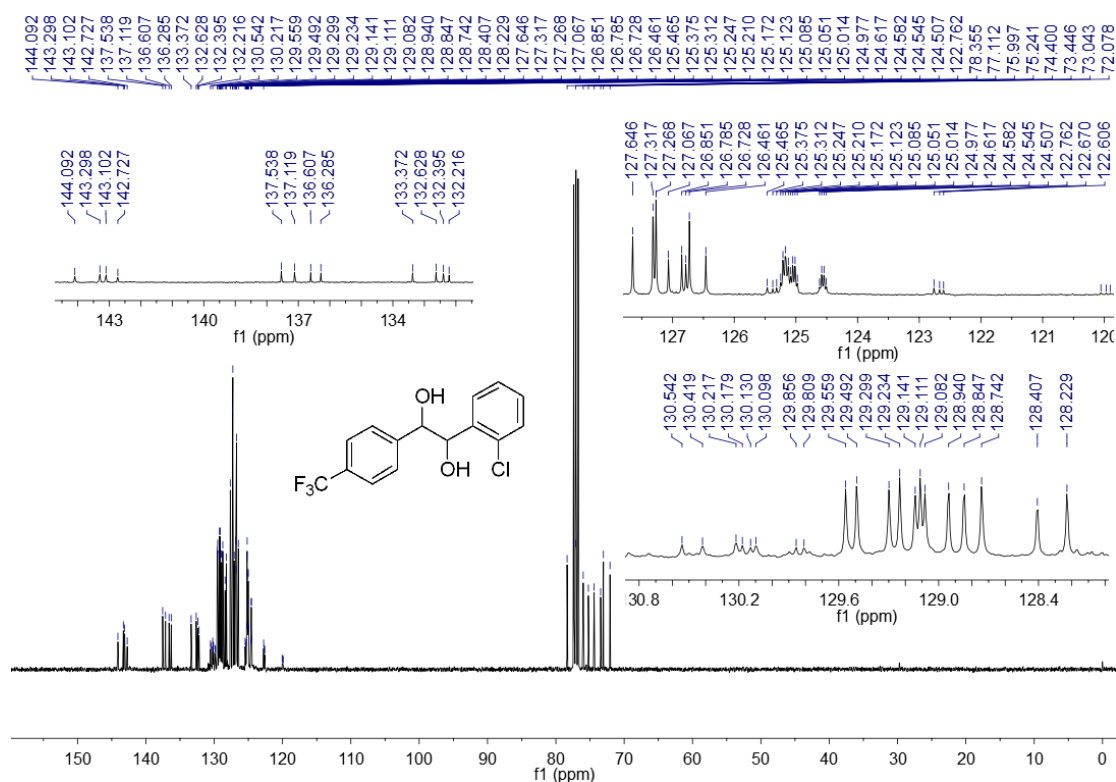



$^{19}\text{F}$  NMR spectrum of compound **5e** (376 MHz) in  $\text{CDCl}_3$

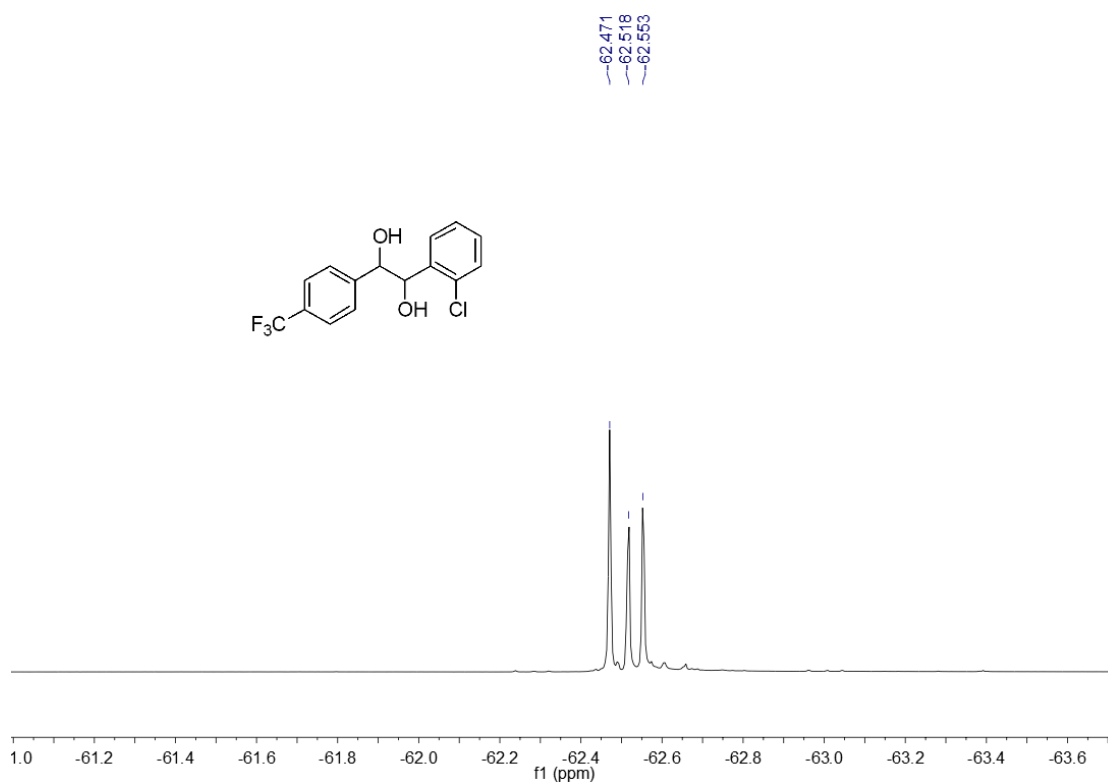

$^1\text{H}$  NMR spectrum of compound **5f** (400 MHz) in  $\text{CDCl}_3$

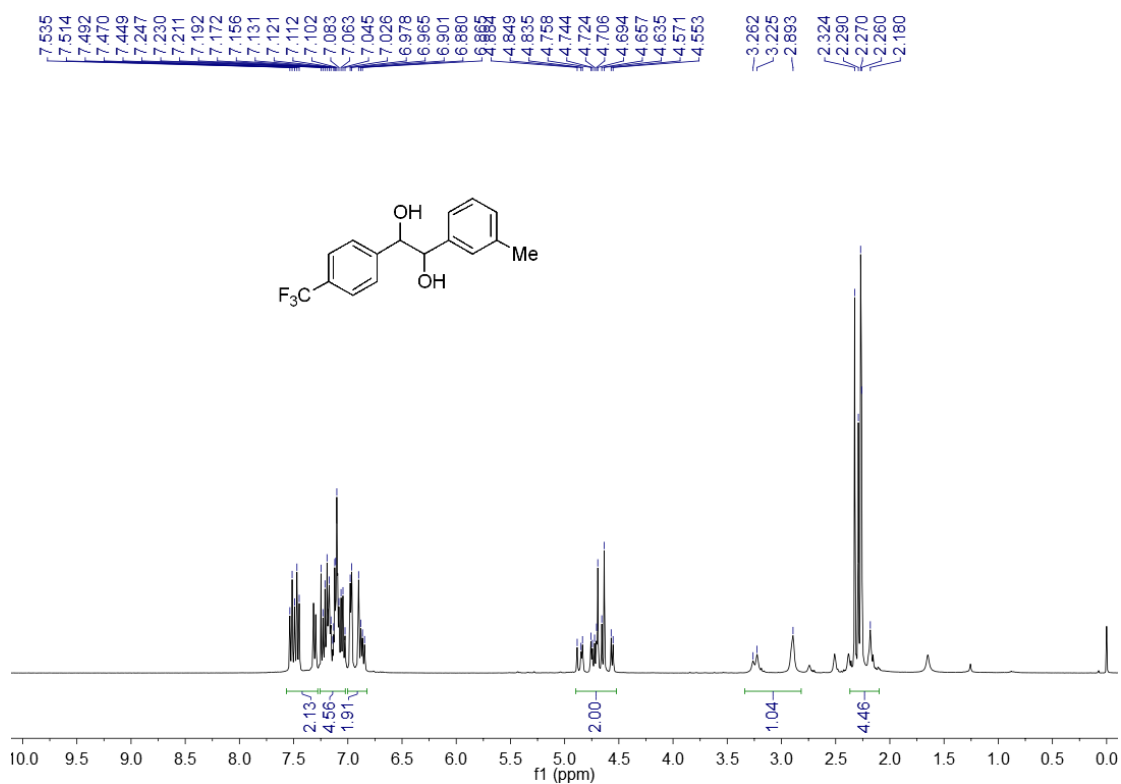



$^{13}\text{C}$  NMR spectrum of compound **5f** (100 MHz) in  $\text{CDCl}_3$

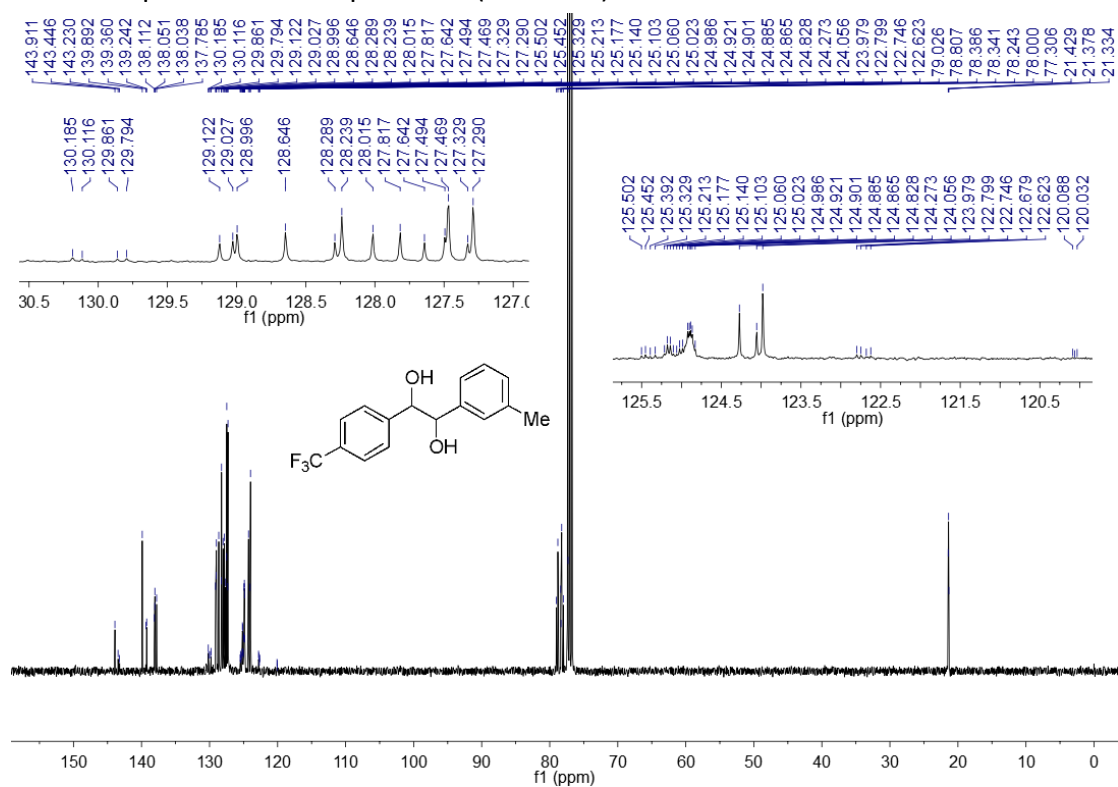

$^{19}\text{F}$  NMR spectrum of compound **5f** (376 MHz) in  $\text{CDCl}_3$

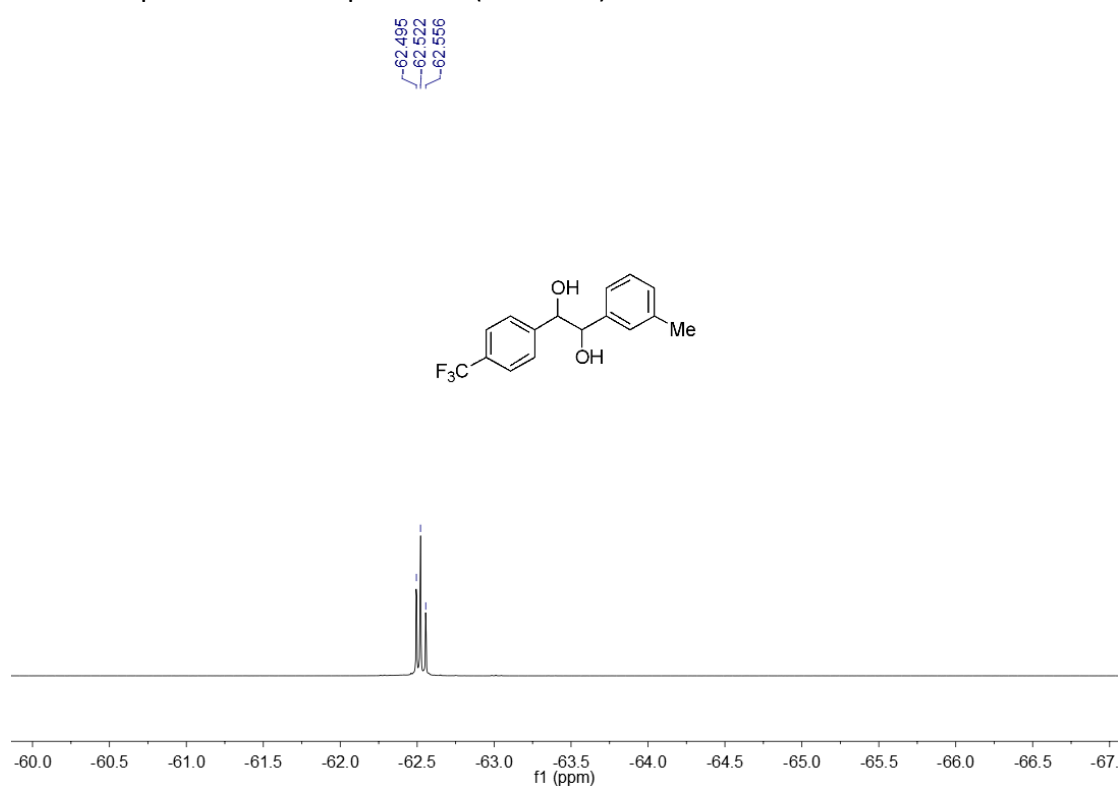



$^1\text{H}$  NMR spectrum of compound **5g** (400 MHz) in  $\text{CDCl}_3$

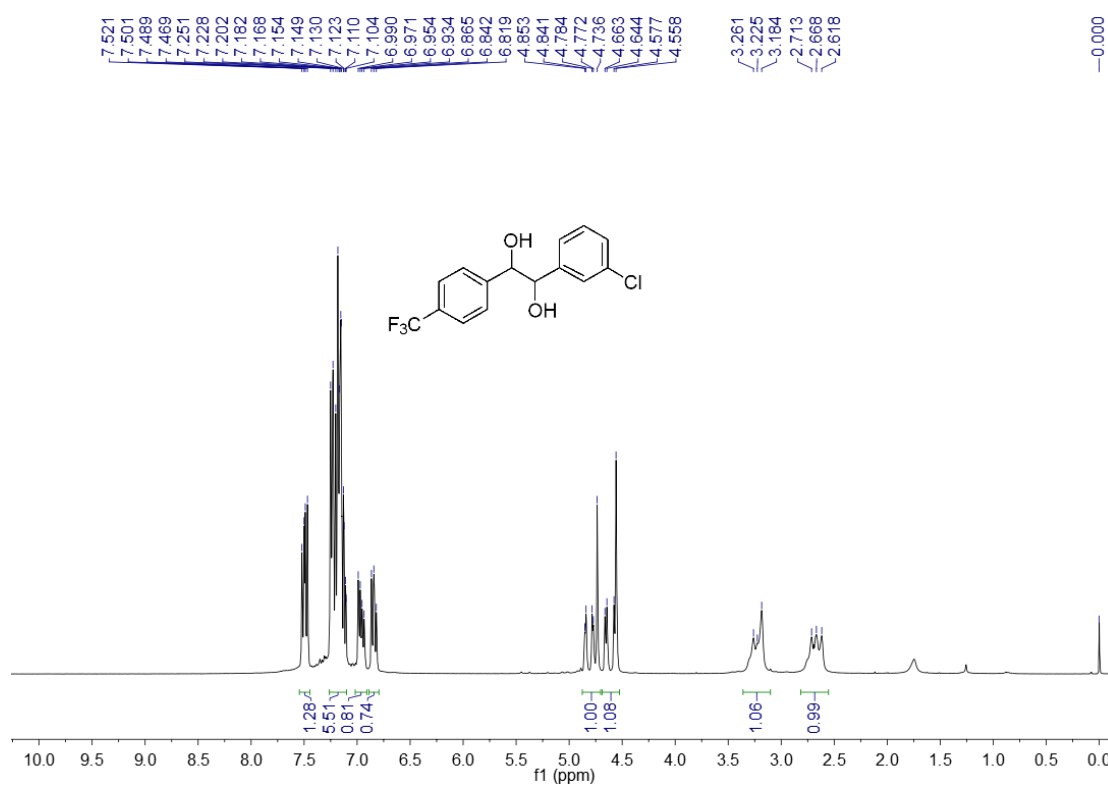

$^{13}\text{C}$  NMR spectrum of compound **5g** (100 MHz) in  $\text{CDCl}_3$

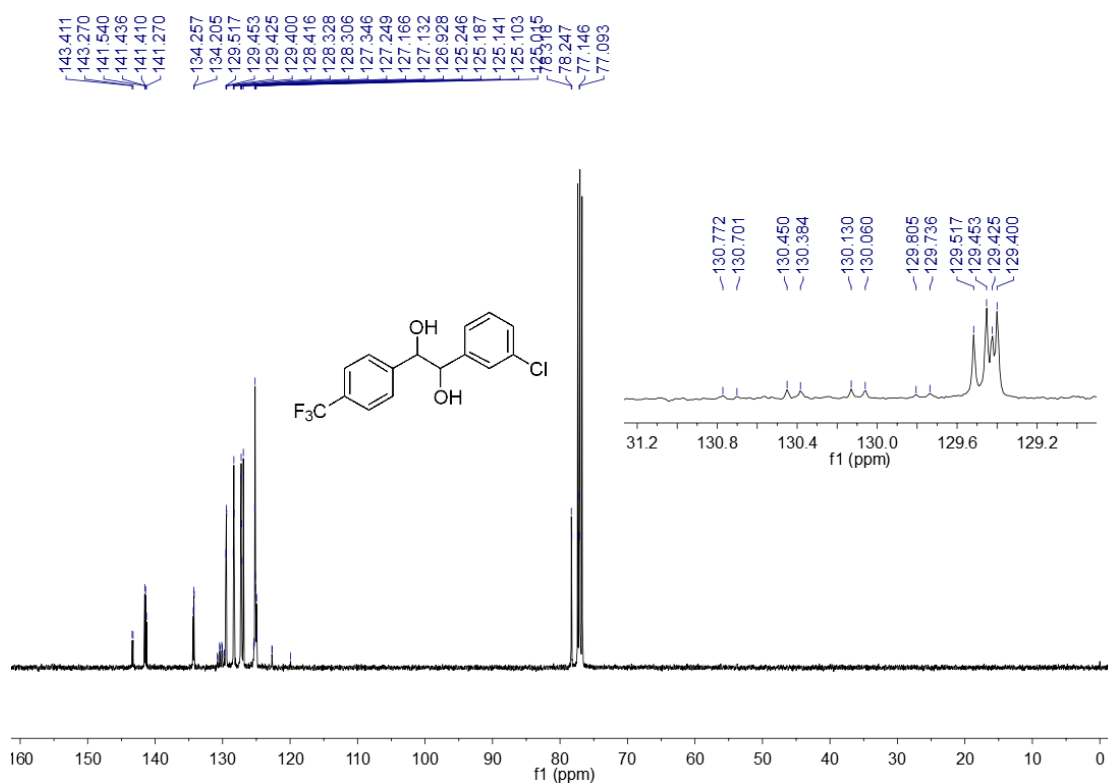



$^{19}\text{F}$  NMR spectrum of compound **5g** (376 MHz) in  $\text{CDCl}_3$

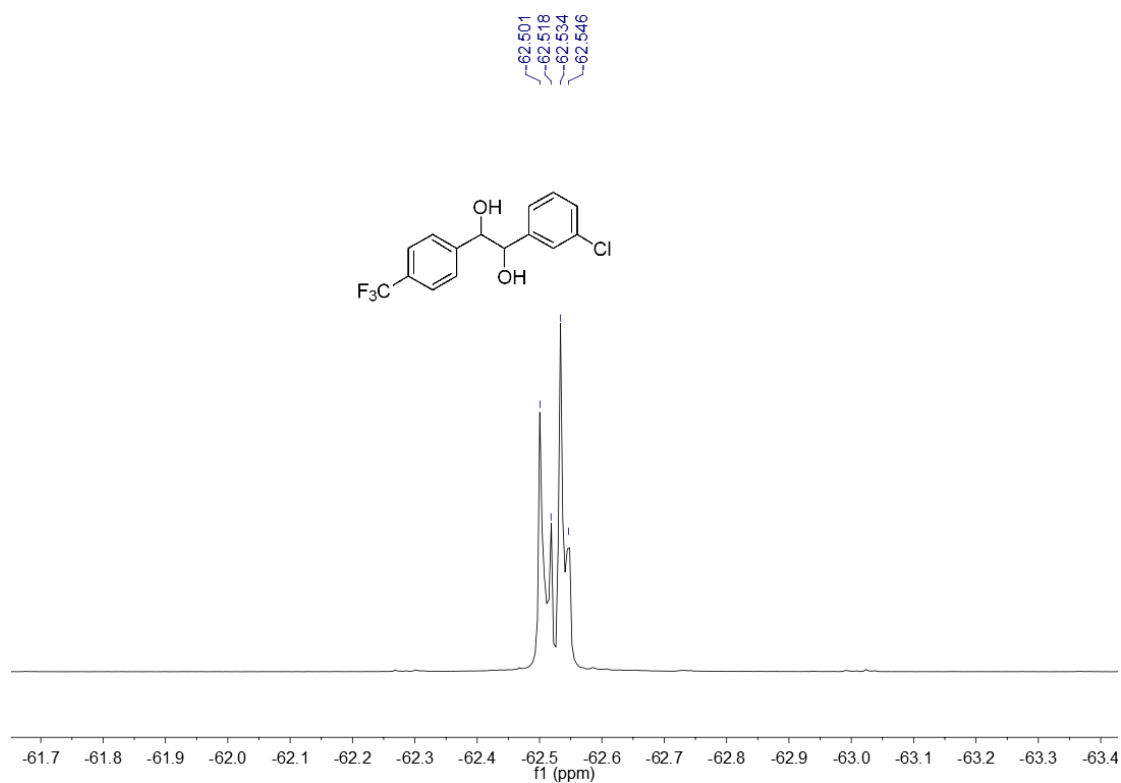

$^1\text{H}$  NMR spectrum of compound **5h** (400 MHz) in  $\text{CDCl}_3$

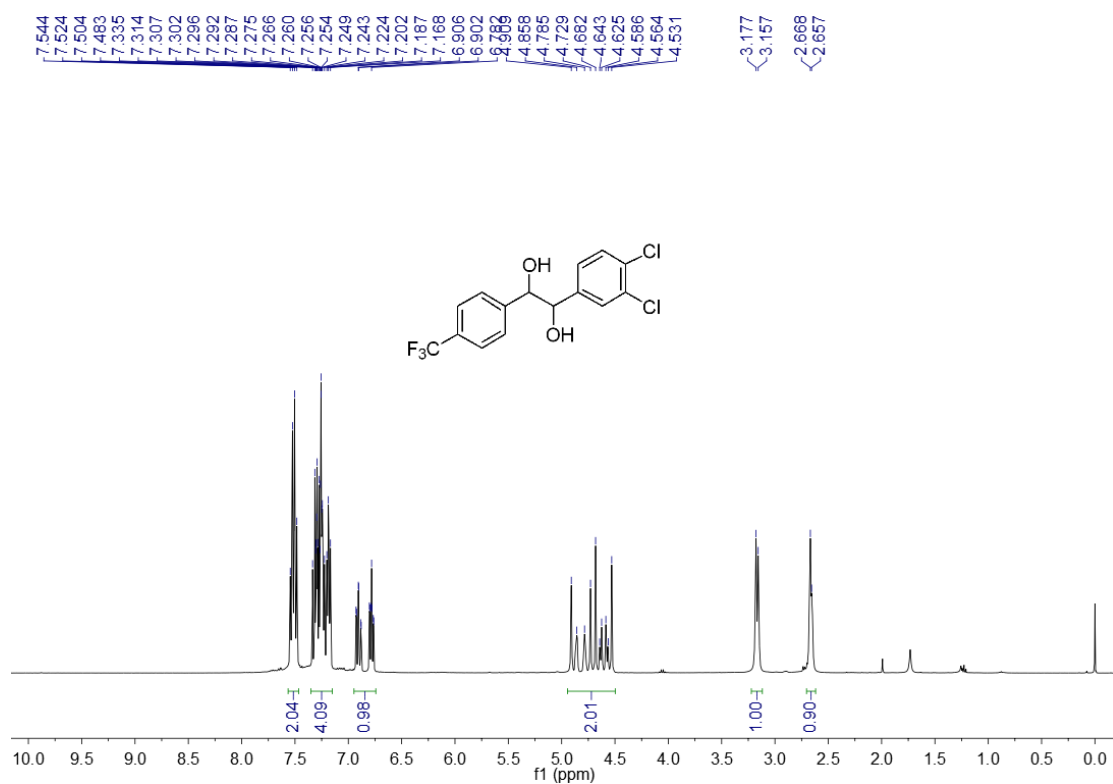



Chemical structure of (R)-1-(4-(trifluoromethyl)phenyl)-2-(2,4-dichlorophenyl)ethan-1-ol:

Clc1cc(Cl)ccc1C(O)(c2ccc(C(F)(F)F)cc2)CO

**13C NMR Peaks (ppm):**

- 143.219, 143.139, 143.064, 139.537, 139.488, 139.435, 139.403
- 130.217, 130.167, 130.118, 130.042, 128.996, 128.960, 128.765, 128.735, 128.735
- 127.321, 127.298, 127.269, 126.367, 126.329, 125.296, 125.255, 125.243, 125.213
- 78.291, 77.763, 77.619, 77.139, 76.990, 76.564, 76.447
- 132.570, 132.463, 132.389, 132.311, 132.298, 132.278, 130.607, 130.548, 130.484, 130.354, 130.282, 130.217, 130.167, 130.118, 130.042, 128.996, 128.960, 128.765, 128.735
- 128.054, 127.992, 127.298, 127.269
- 119.943, 119.880

Chemical structure of (2S,3S)-2-(4-(trifluoromethyl)phenyl)-3-(2,4-dichlorophenyl)butane-2,3-diol is shown above the spectrum.

Peak list (ppm):

| Peak Label | Chemical Shift (ppm) |
|------------|----------------------|
| 62.515     | -62.515              |
| 62.536     | -62.536              |
| 62.552     | -62.552              |
| 62.570     | -62.570              |



$^1\text{H}$  NMR spectrum of compound **5i** (400 MHz) in  $\text{CDCl}_3$

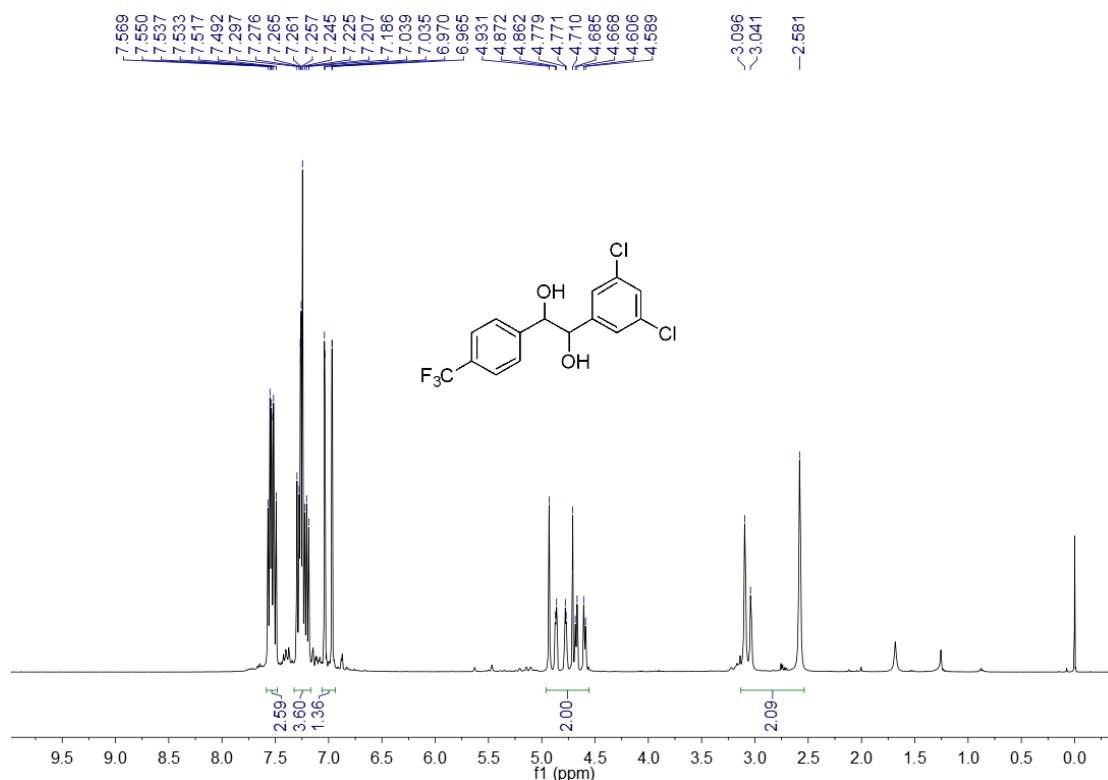

$^{13}\text{C}$  NMR spectrum of compound **5i** (100 MHz) in  $\text{CDCl}_3$

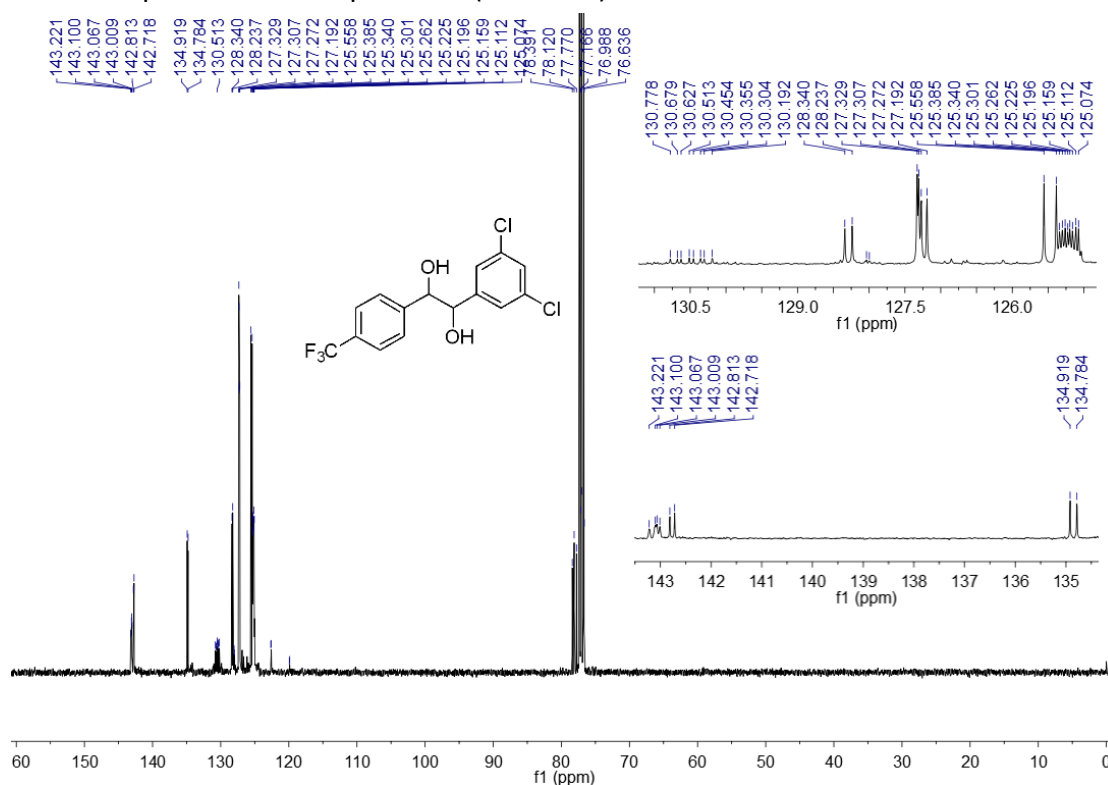



$^{19}\text{F}$  NMR spectrum of compound **5i** (376 MHz) in  $\text{CDCl}_3$

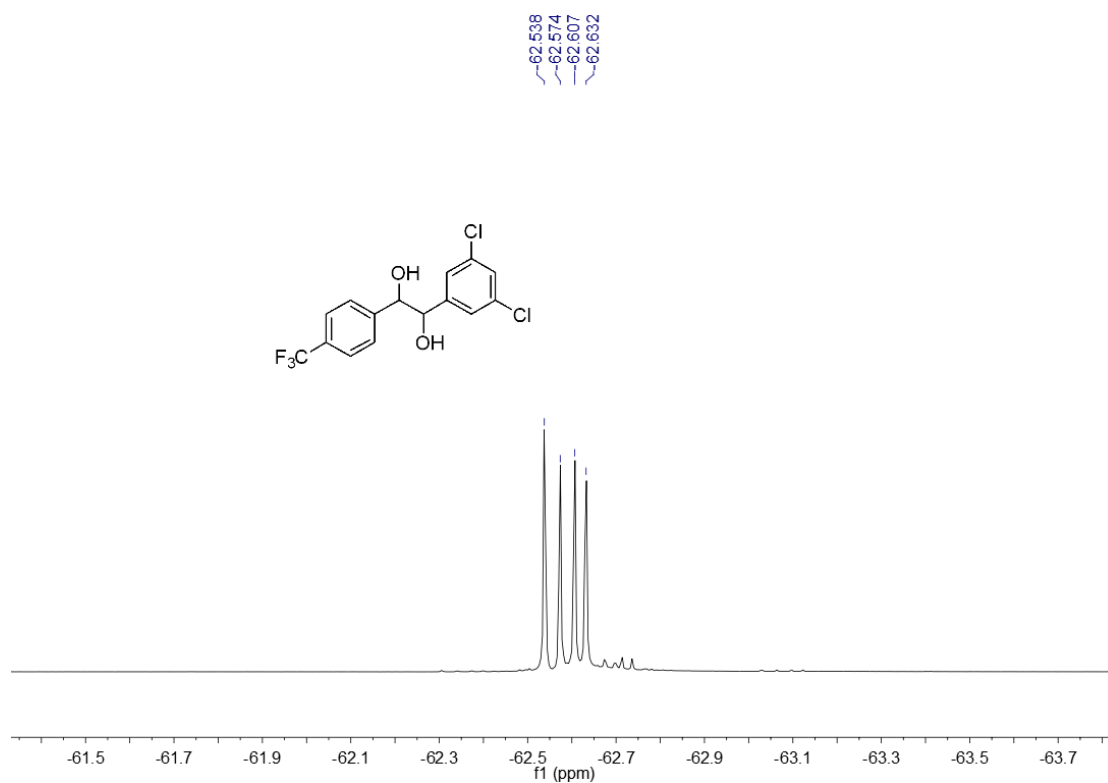

$^1\text{H}$  NMR spectrum of compound **5j** (400 MHz) in  $\text{CDCl}_3$

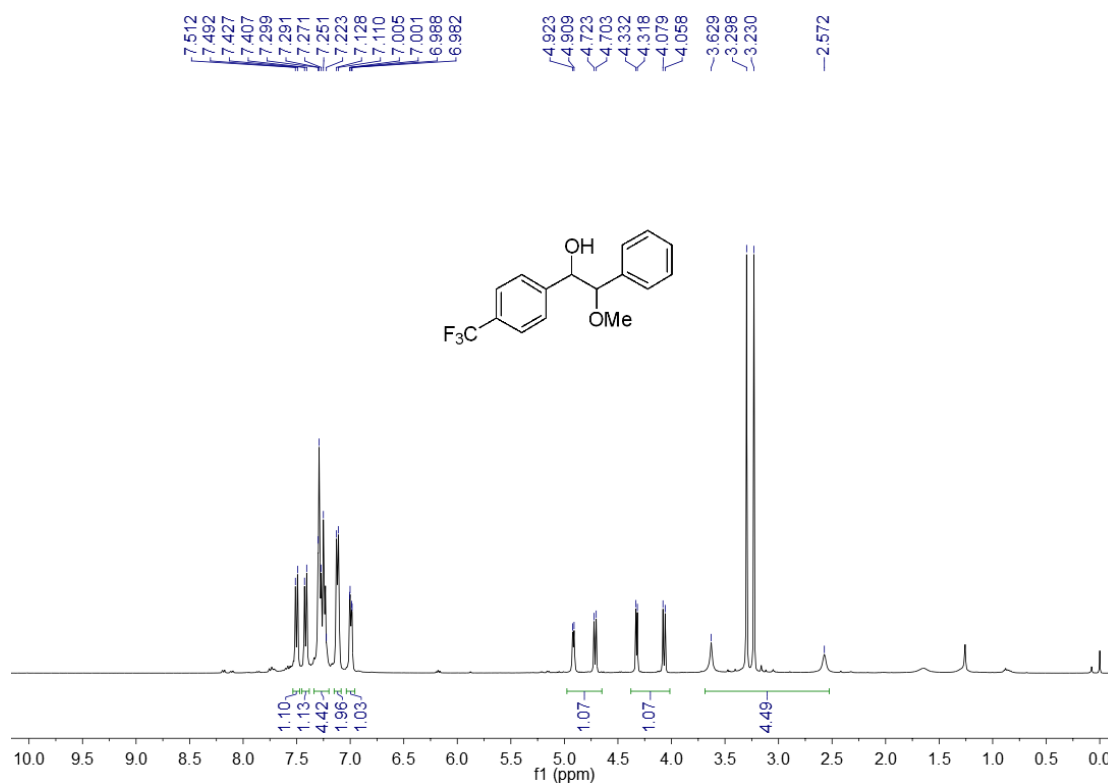



$^{13}\text{C}$  NMR spectrum of compound **5j** (100 MHz) in  $\text{CDCl}_3$

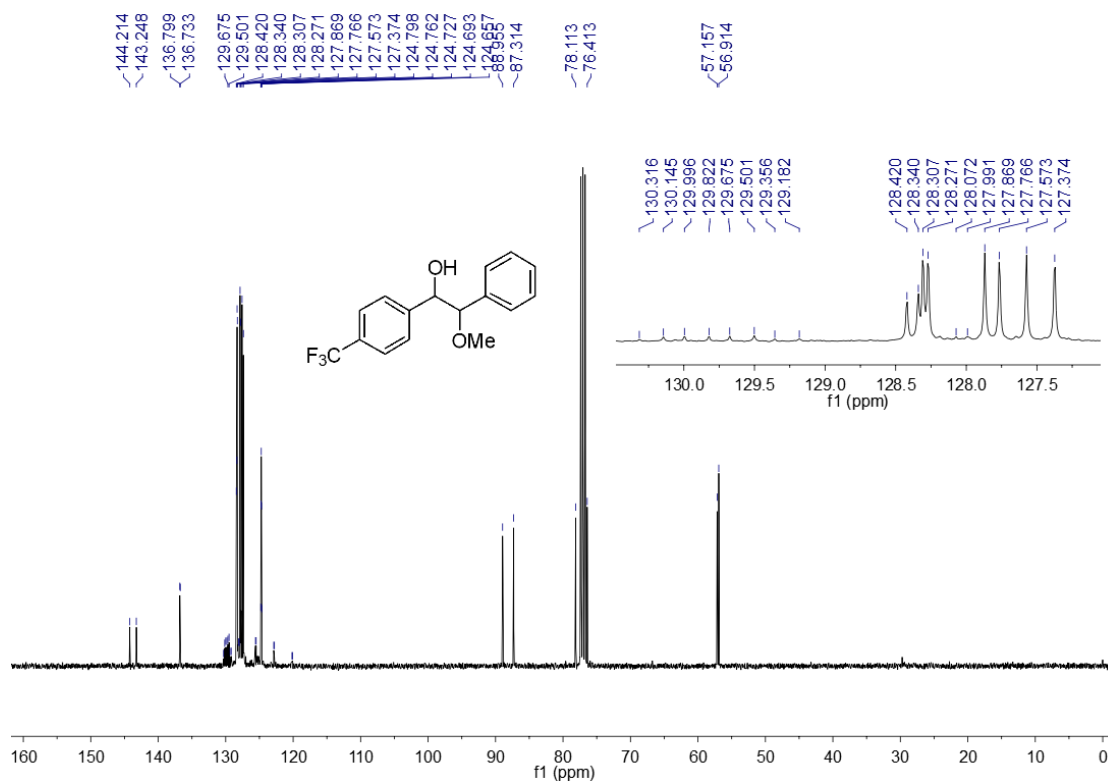

$^{19}\text{F}$  NMR spectrum of compound **5j** (376 MHz) in  $\text{CDCl}_3$

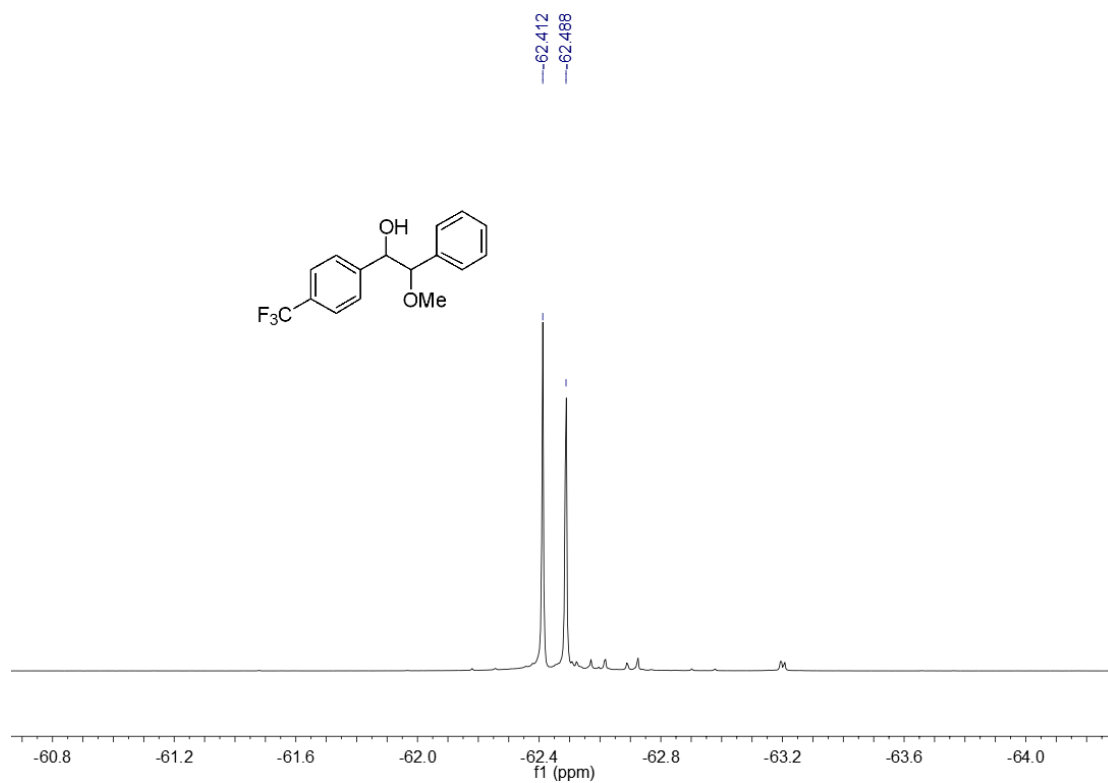



$^1\text{H}$  NMR spectrum of compound **5k** (400 MHz) in  $\text{CDCl}_3$

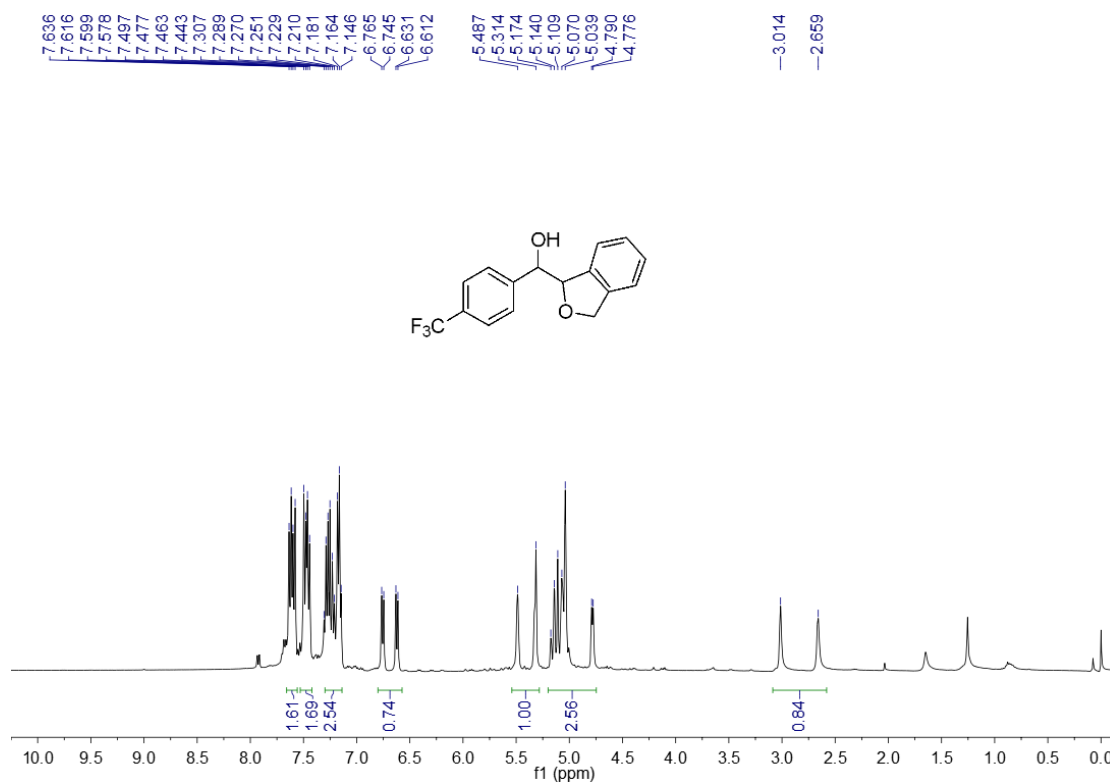

$^{13}\text{C}$  NMR spectrum of compound **5k** (100 MHz) in  $\text{CDCl}_3$

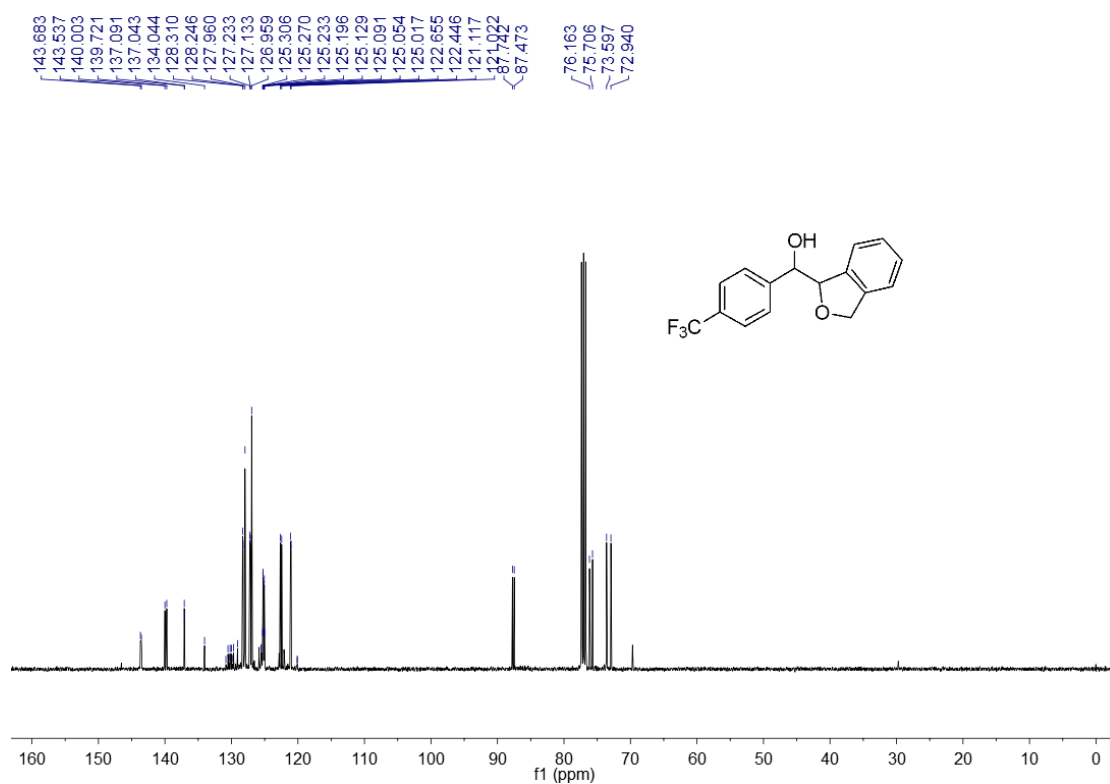



$^{19}\text{F}$  NMR spectrum of compound **5k** (376 MHz) in  $\text{CDCl}_3$

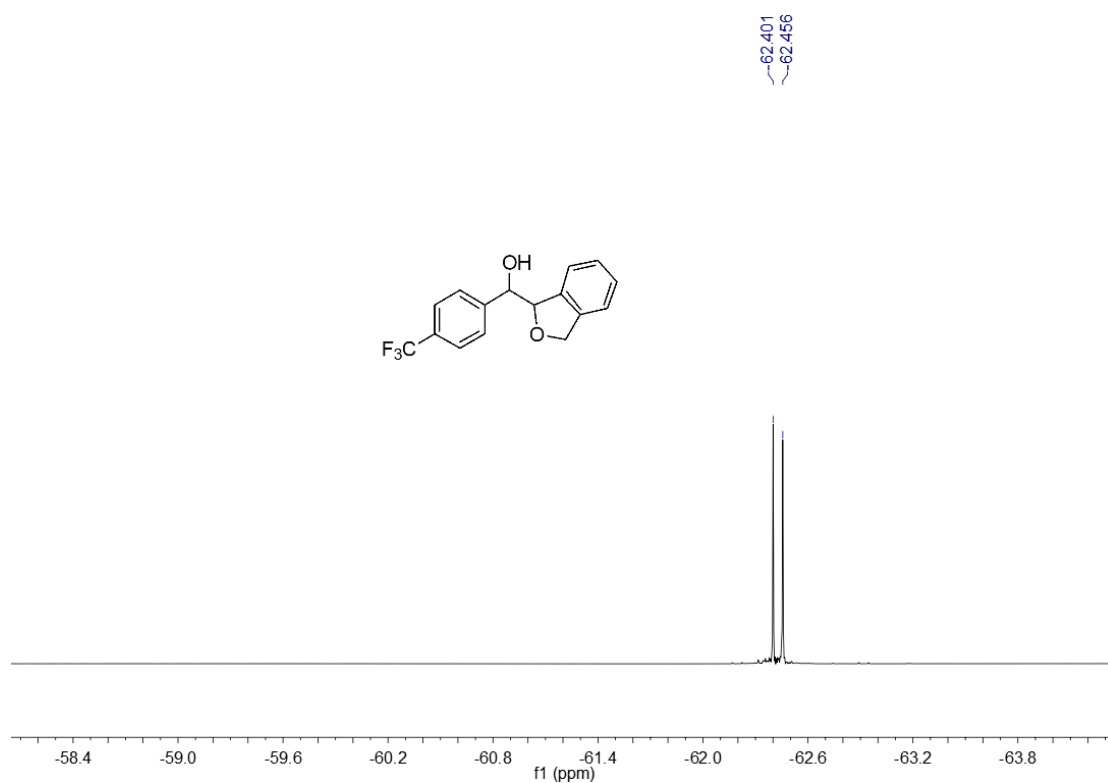

$^1\text{H}$  NMR spectrum of compound **5l** (400 MHz) in  $\text{CDCl}_3$

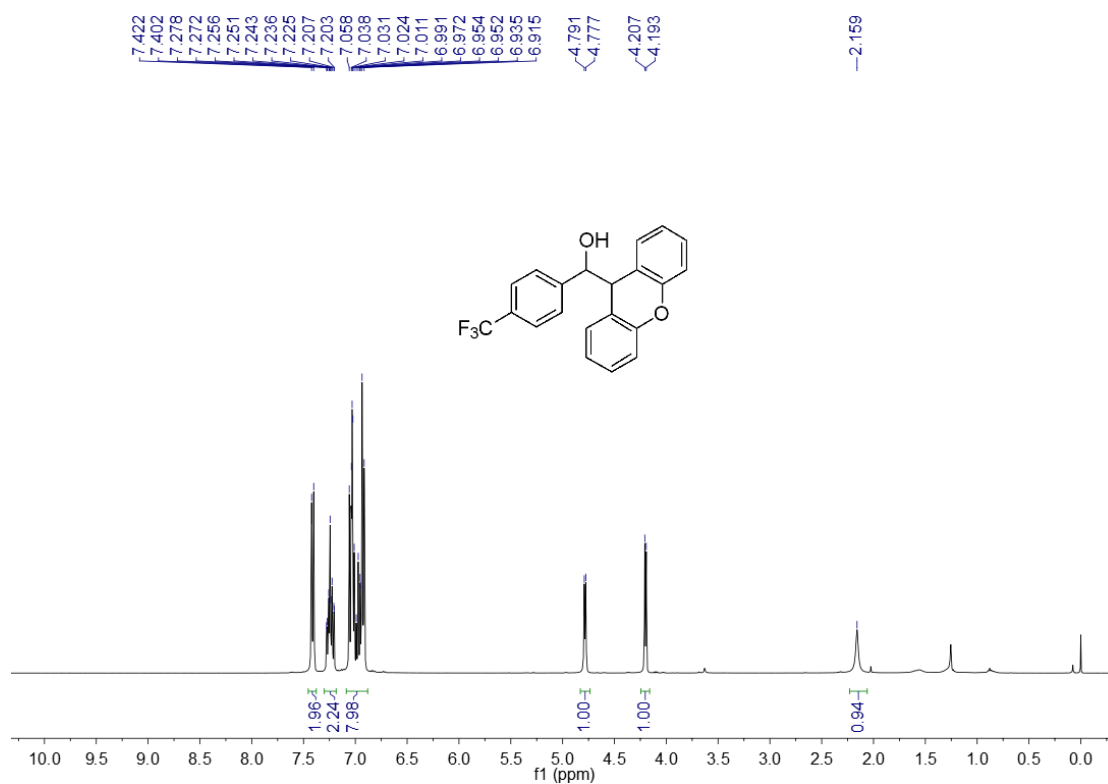

$^{13}\text{C}$  NMR spectrum of compound **5l** (100 MHz) in  $\text{CDCl}_3$



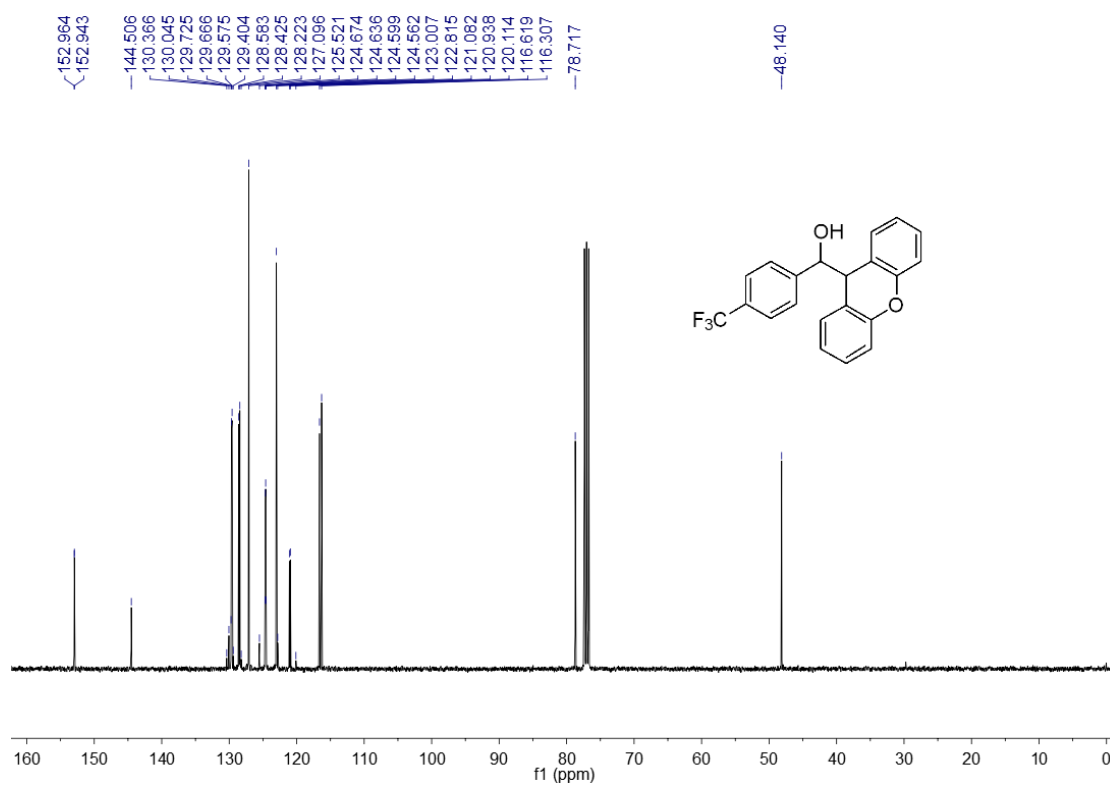

**<sup>19</sup>F NMR spectrum of compound 5I (376 MHz) in CDCl<sub>3</sub>**

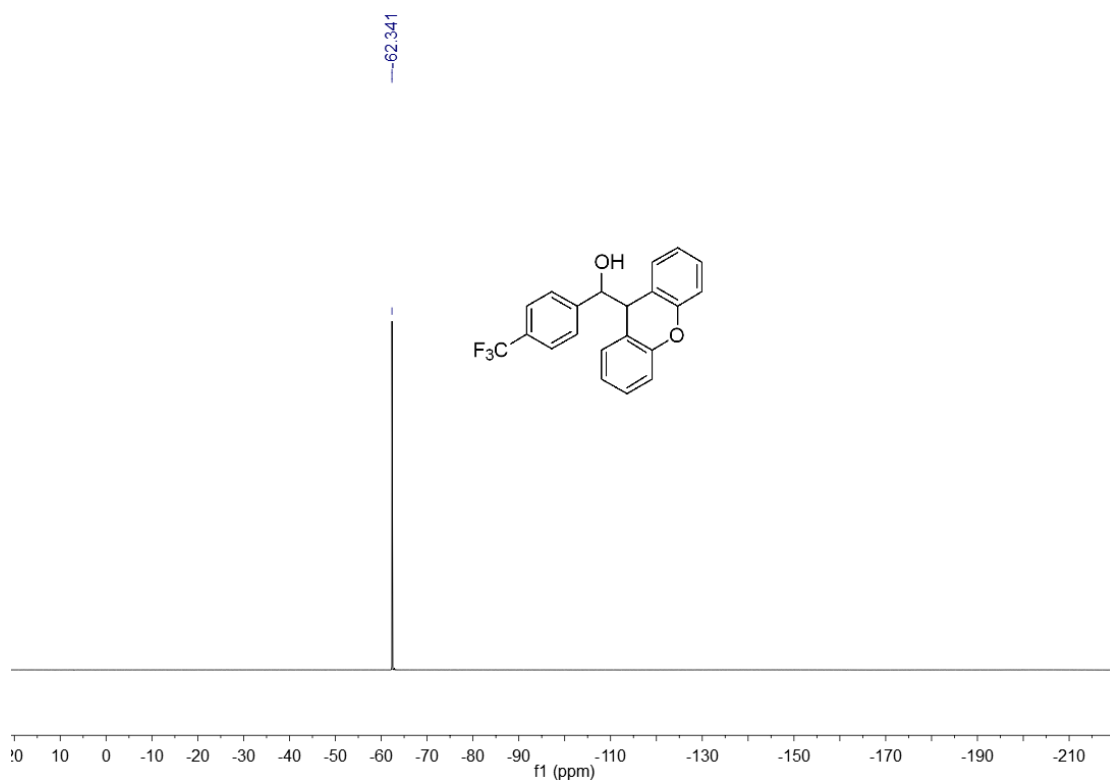



$^1\text{H}$  NMR spectrum of compound **5m** (400 MHz) in  $\text{CDCl}_3$

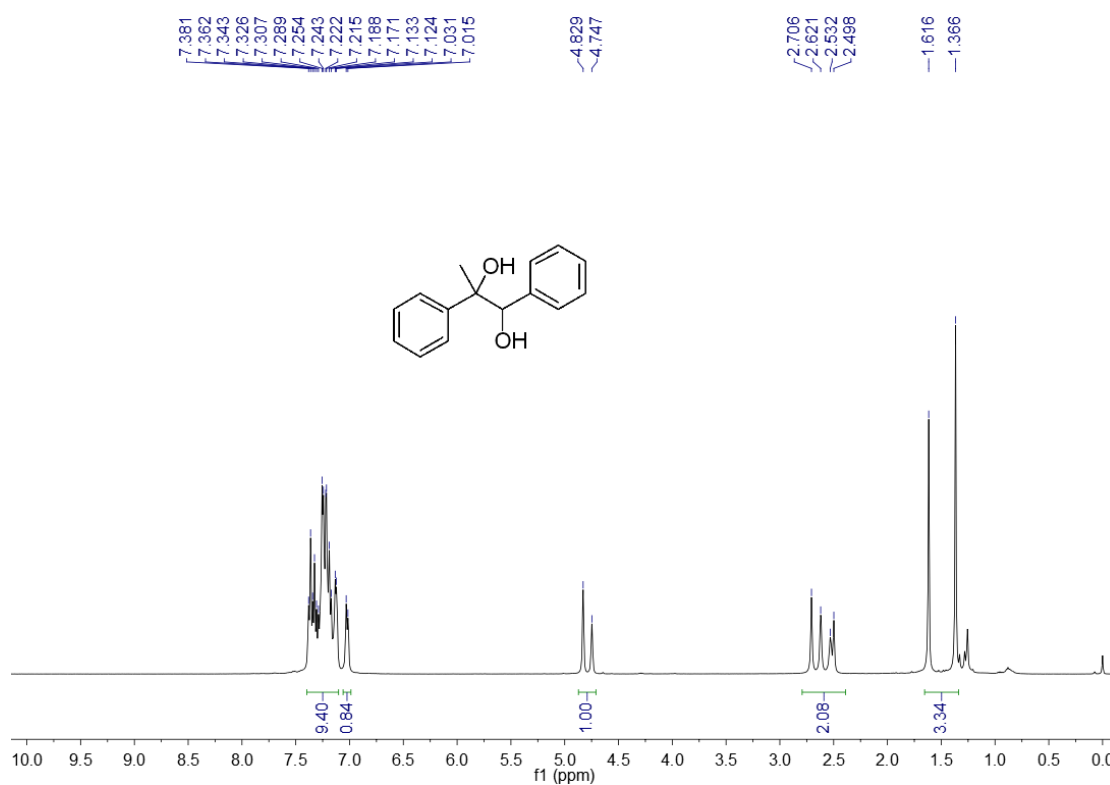

$^{13}\text{C}$  NMR spectrum of compound **5m** (100 MHz) in  $\text{CDCl}_3$

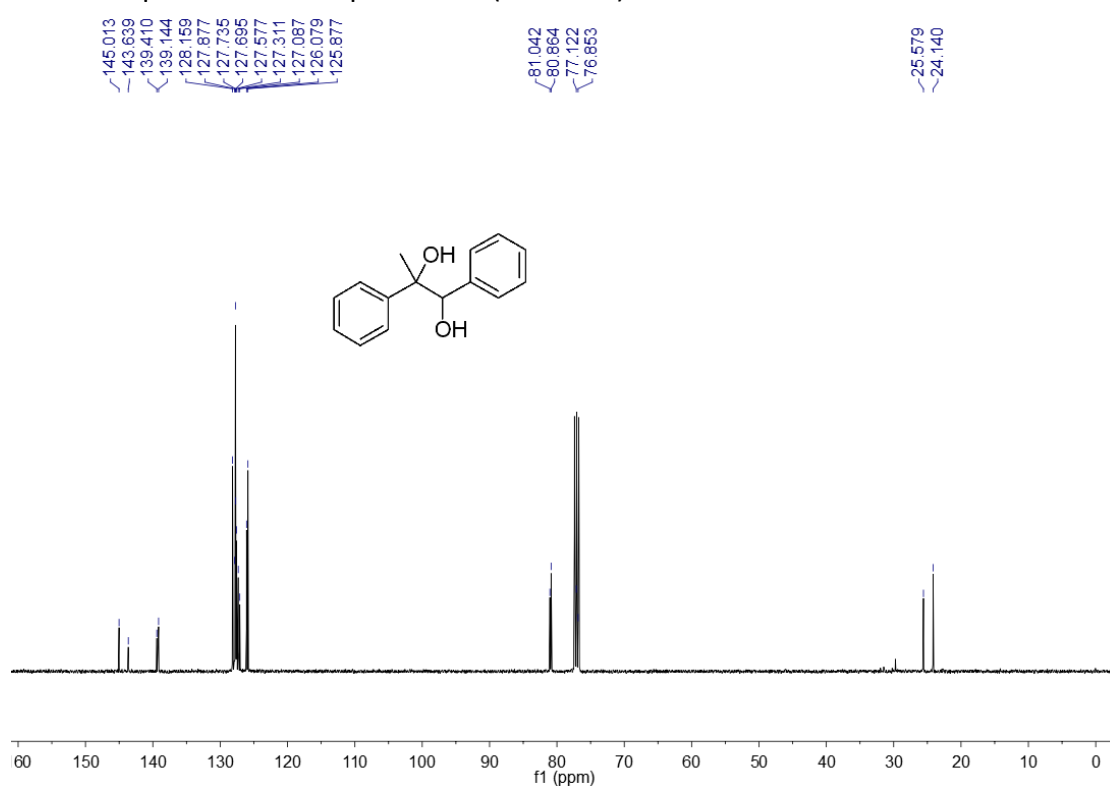



$^1\text{H}$  NMR spectrum of compound **5n** (400 MHz) in  $\text{CDCl}_3$

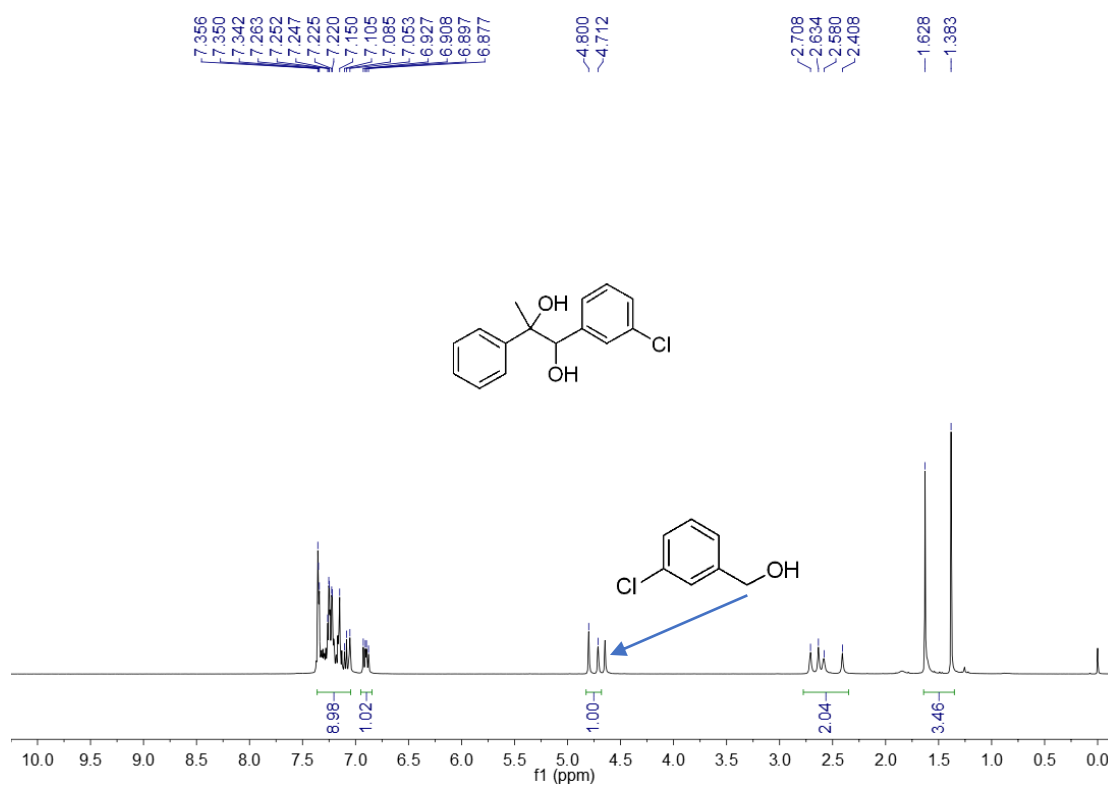

$^{13}\text{C}$  NMR spectrum of compound **5n** (100 MHz) in  $\text{CDCl}_3$

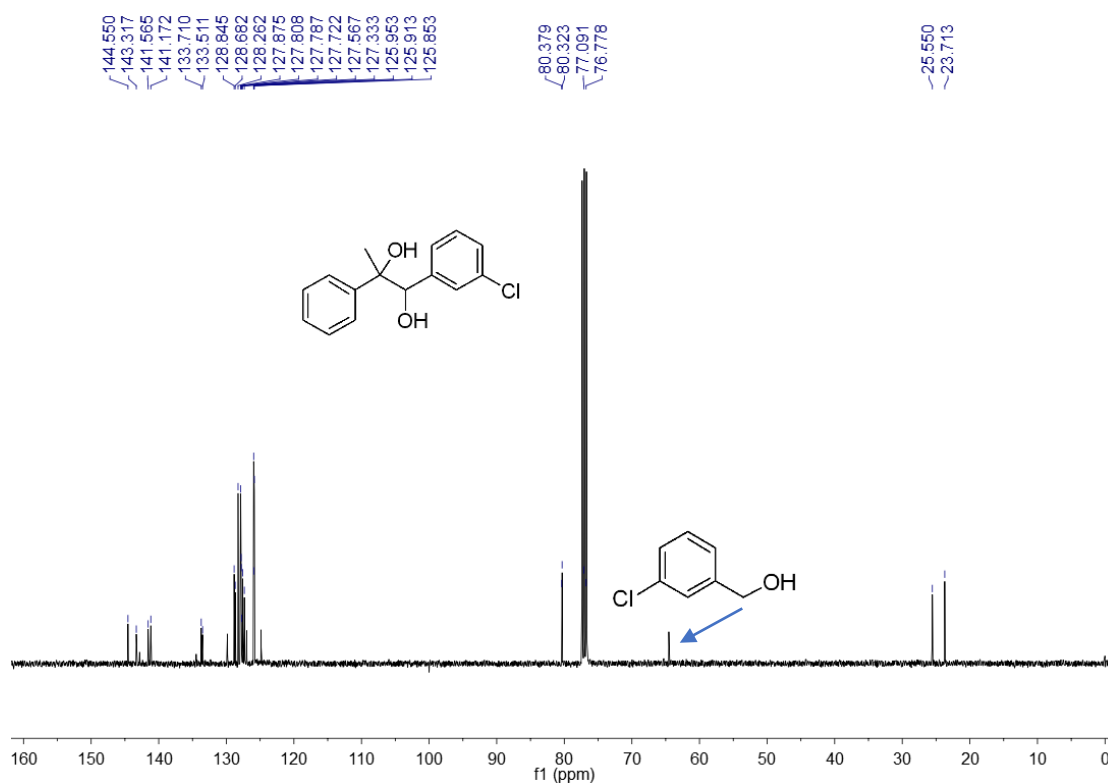



<sup>1</sup>H NMR spectrum of compound **7a** (400 MHz) in CDCl<sub>3</sub>

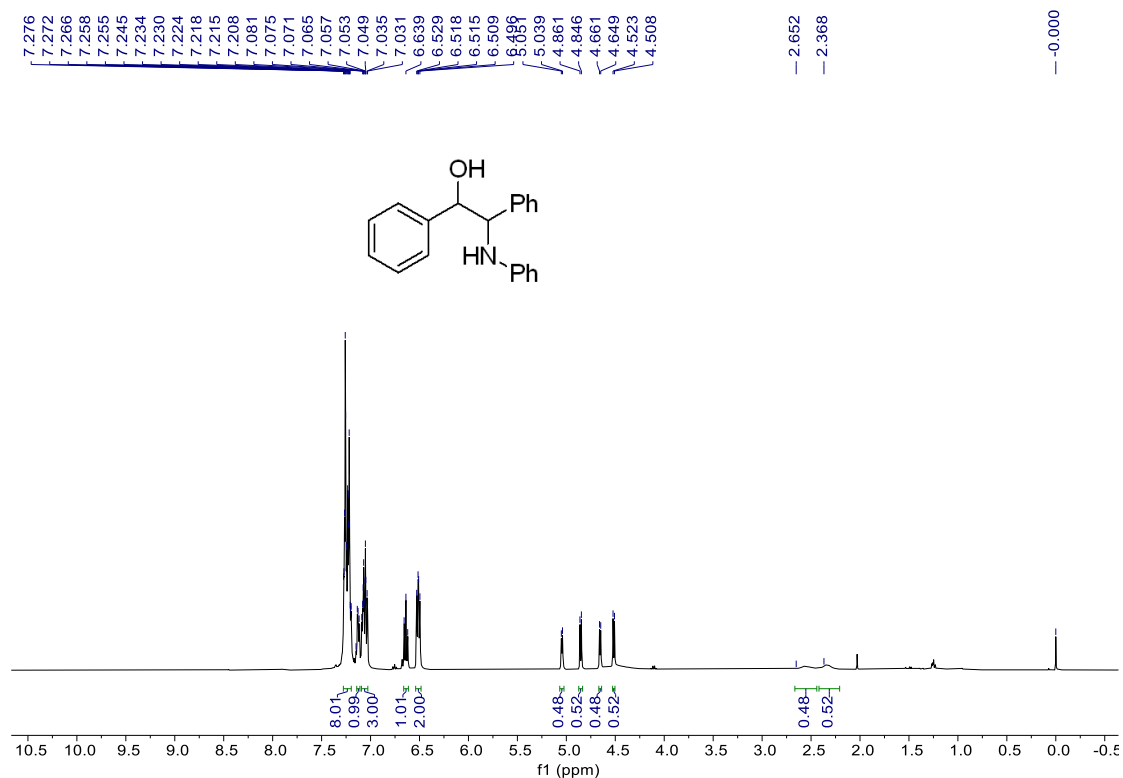

<sup>13</sup>C NMR spectrum of compound **7a** (100 MHz) in CDCl<sub>3</sub>

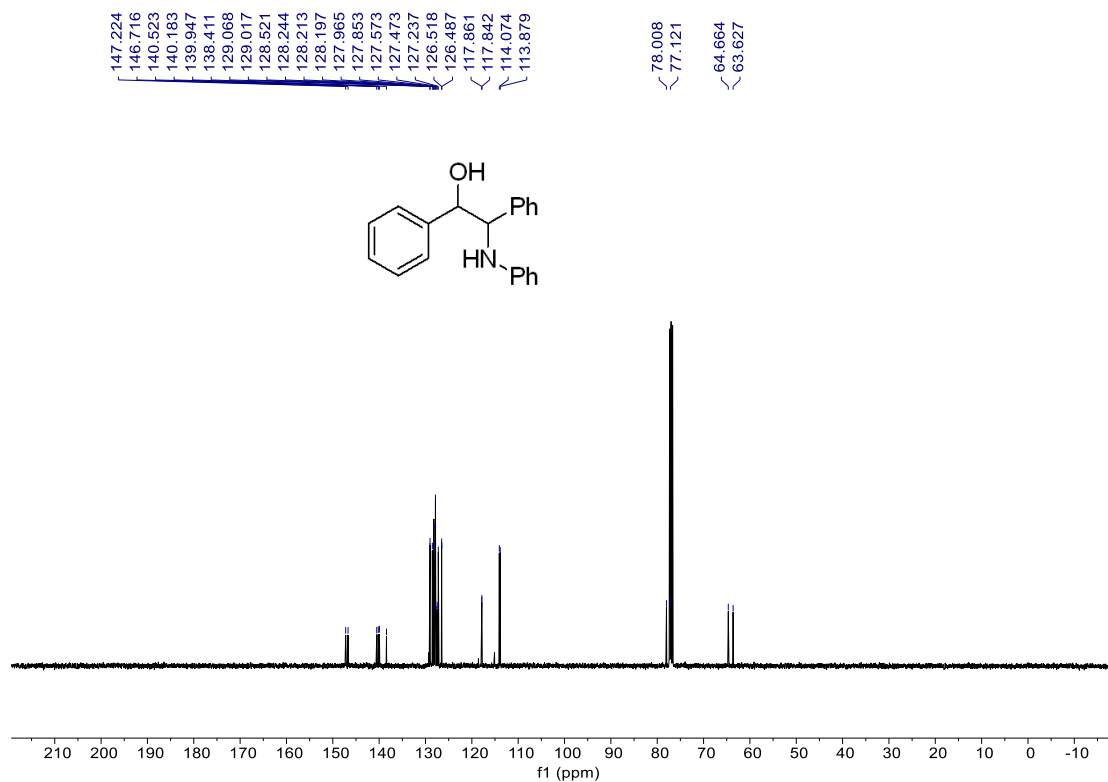



$^1\text{H}$  NMR spectrum of compound **7b** (400 MHz) in  $\text{CDCl}_3$

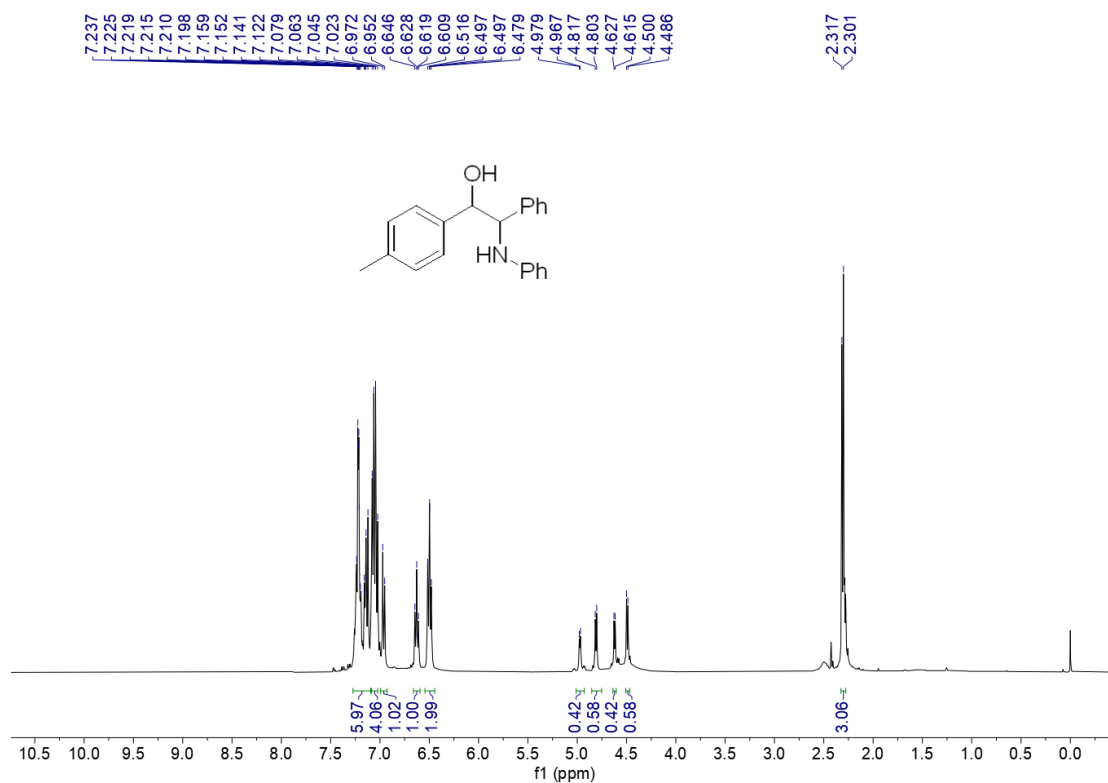

$^{13}\text{C}$  NMR spectrum of compound **7b** (100 MHz) in  $\text{CDCl}_3$

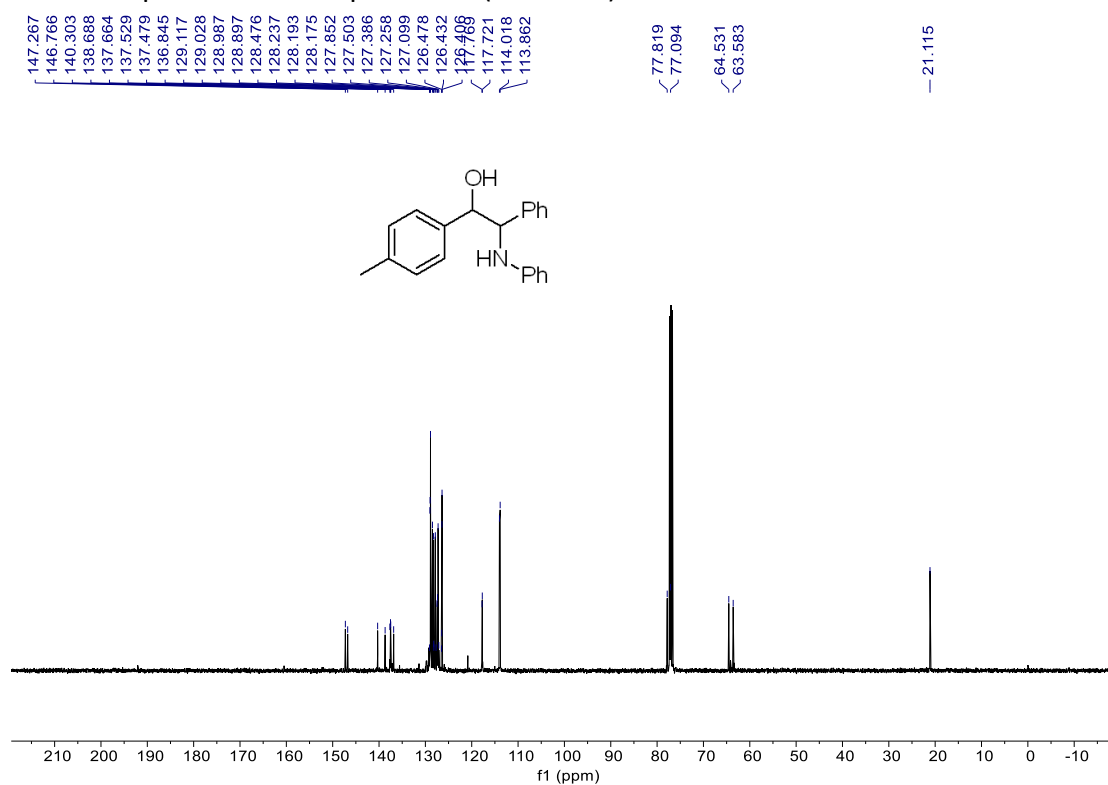



<sup>1</sup>H NMR spectrum of compound **7c** (400 MHz) in CDCl<sub>3</sub>

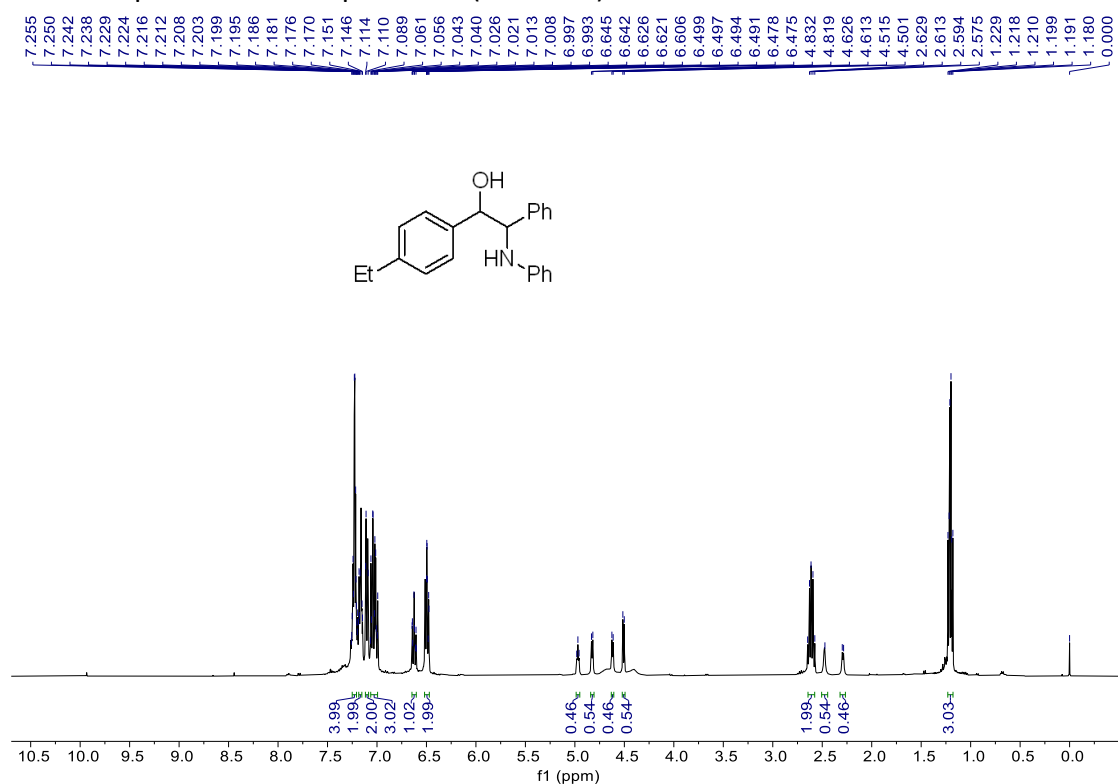

<sup>13</sup>C NMR spectrum of compound **7c** (100 MHz) in CDCl<sub>3</sub>

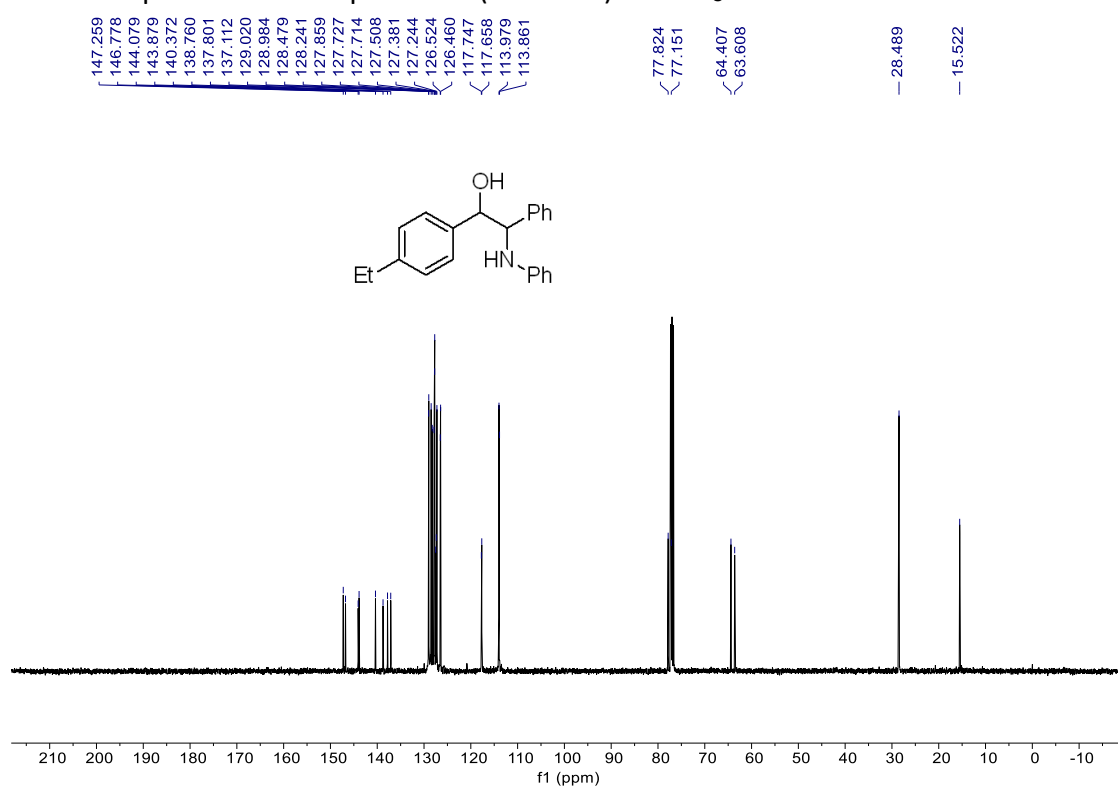



$^1\text{H}$  NMR spectrum of compound **7d** (400 MHz) in  $\text{CDCl}_3$

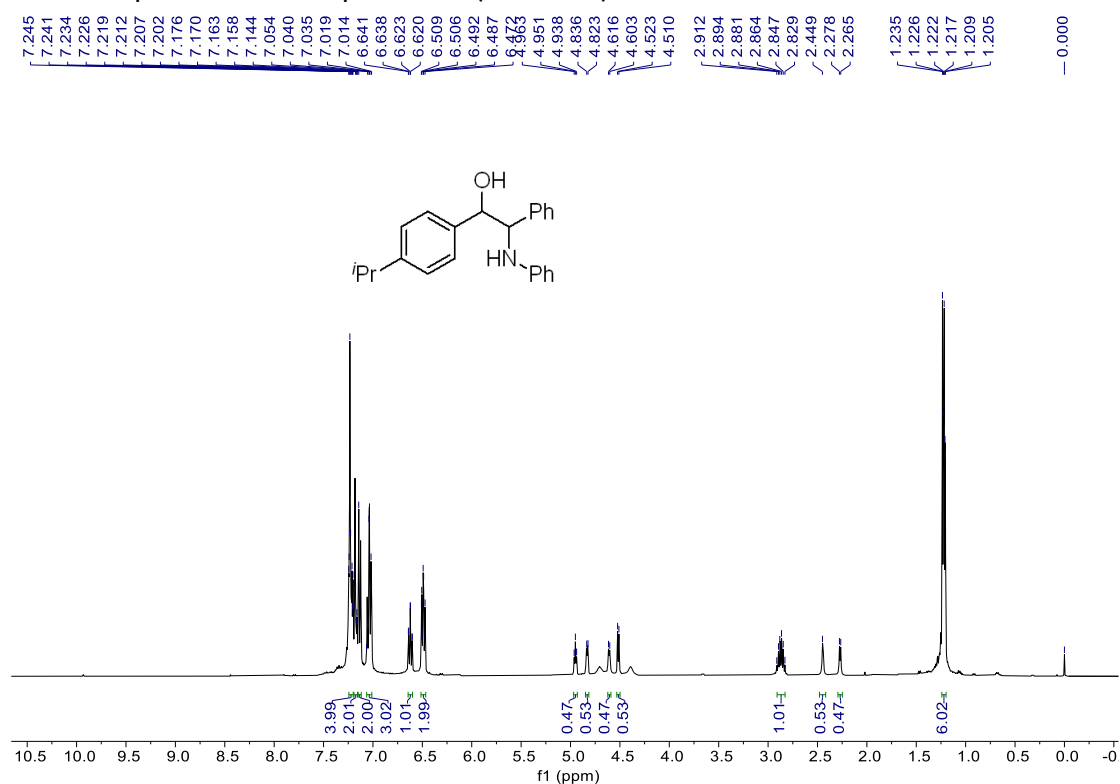

$^{13}\text{C}$  NMR spectrum of compound **7d** (100 MHz) in  $\text{CDCl}_3$

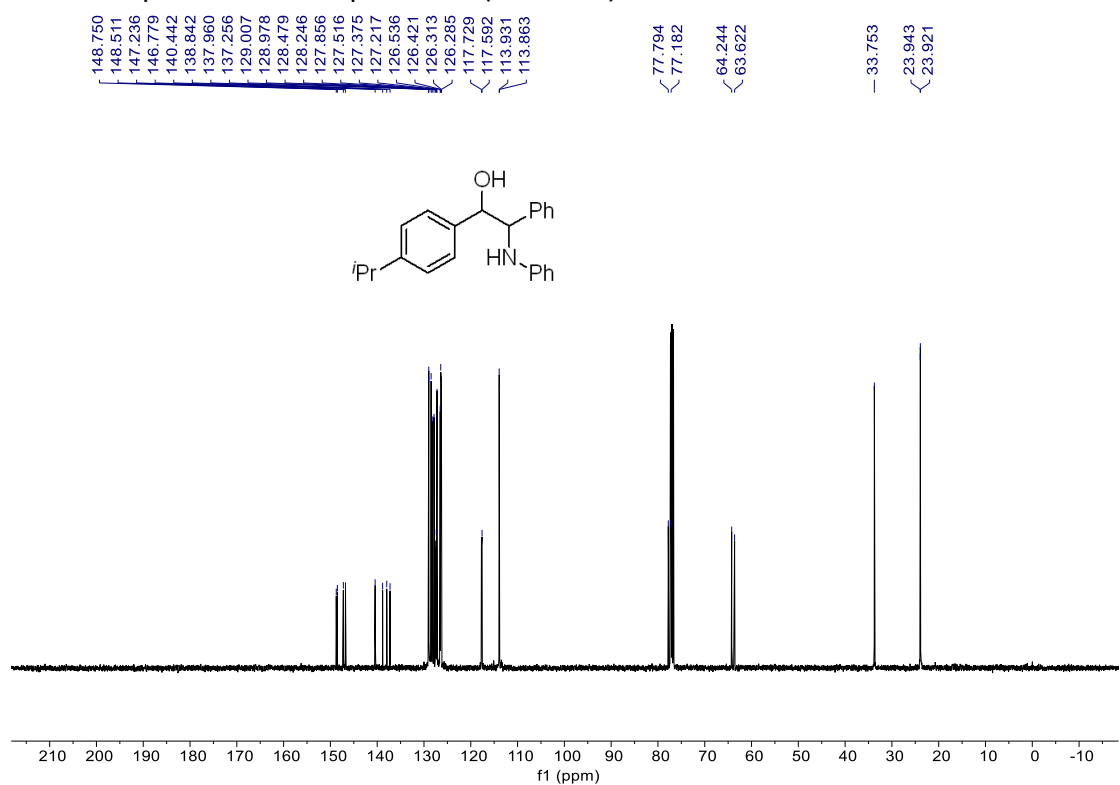



$^1\text{H}$  NMR spectrum of compound **7e** (400 MHz) in  $\text{CDCl}_3$

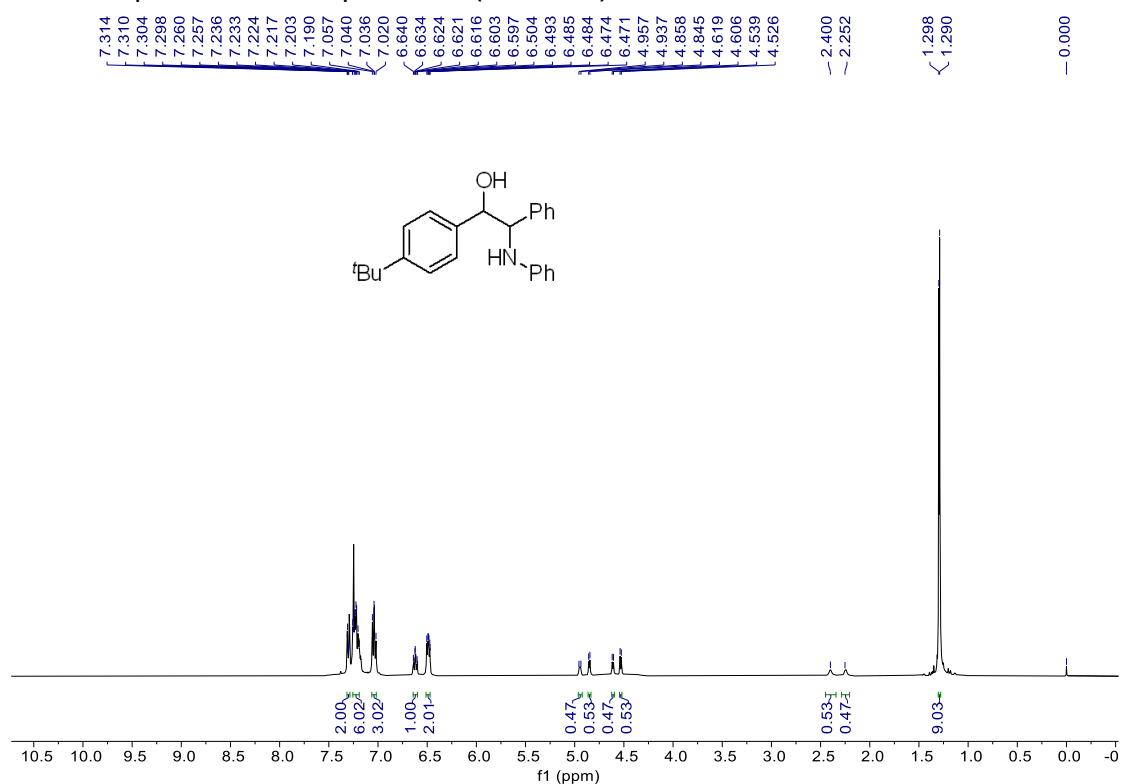

$^{13}\text{C}$  NMR spectrum of compound **7e** (100 MHz) in  $\text{CDCl}_3$

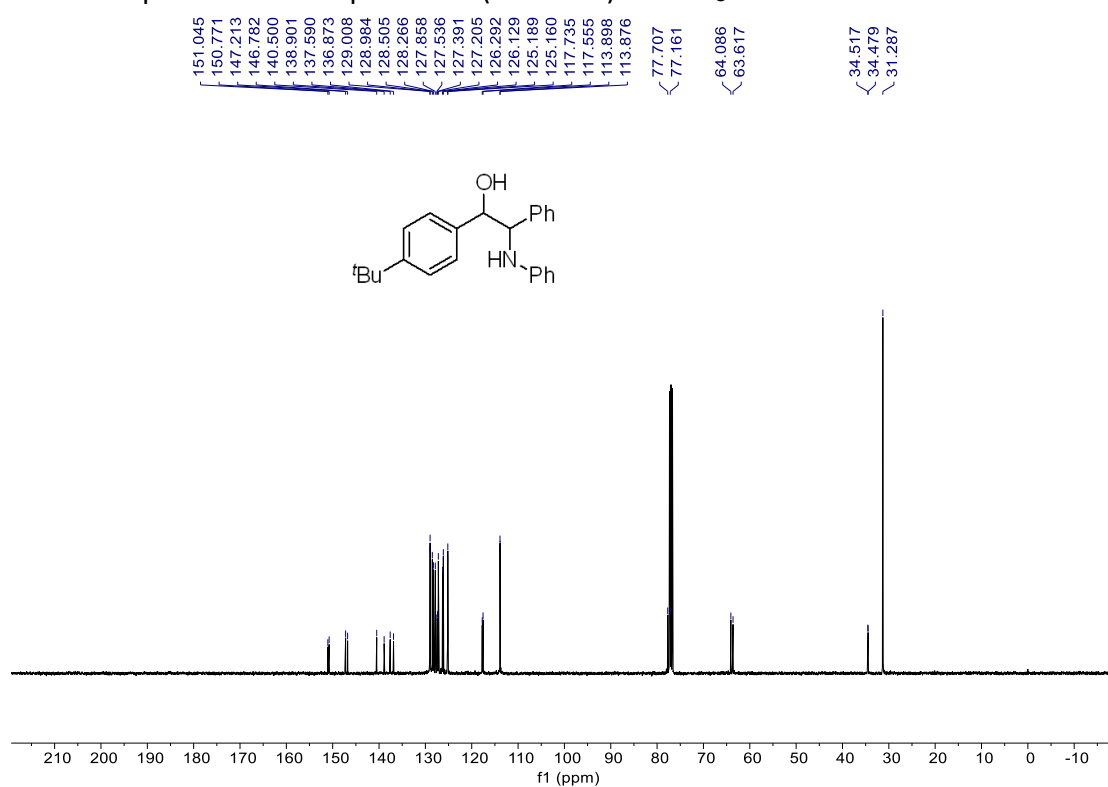



<sup>1</sup>H NMR spectrum of compound **7f** (400 MHz) in CDCl<sub>3</sub>

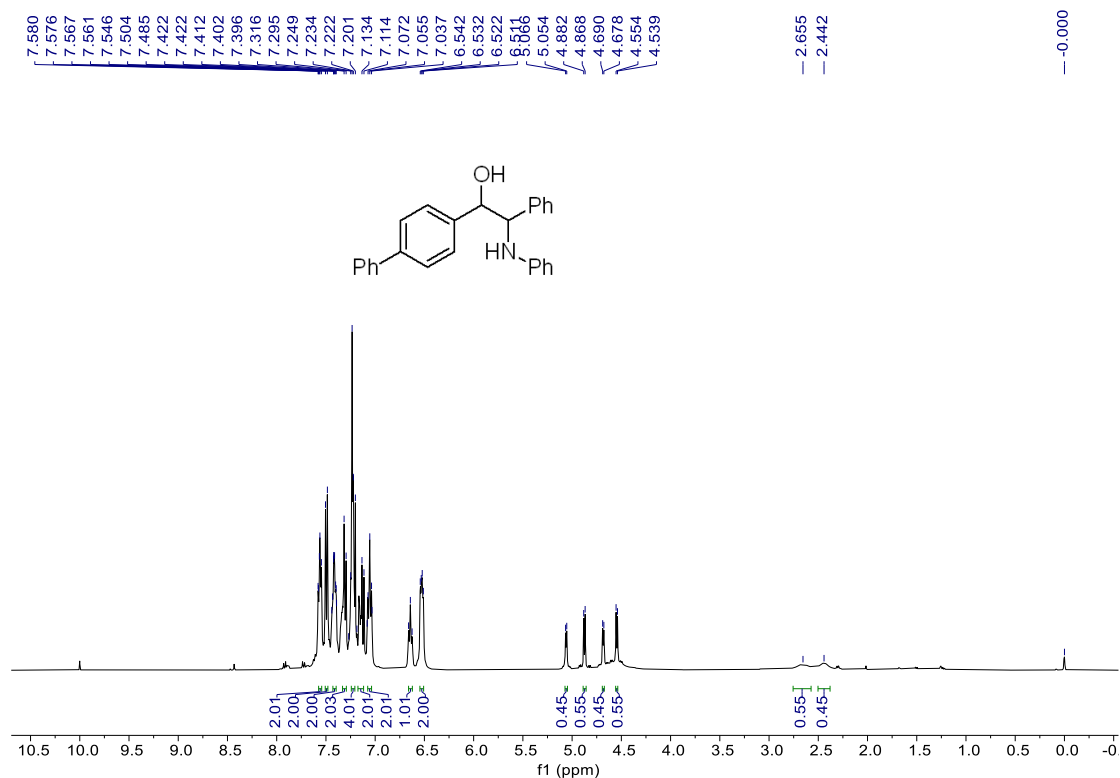

<sup>13</sup>C NMR spectrum of compound **7f** (100 MHz) in CDCl<sub>3</sub>

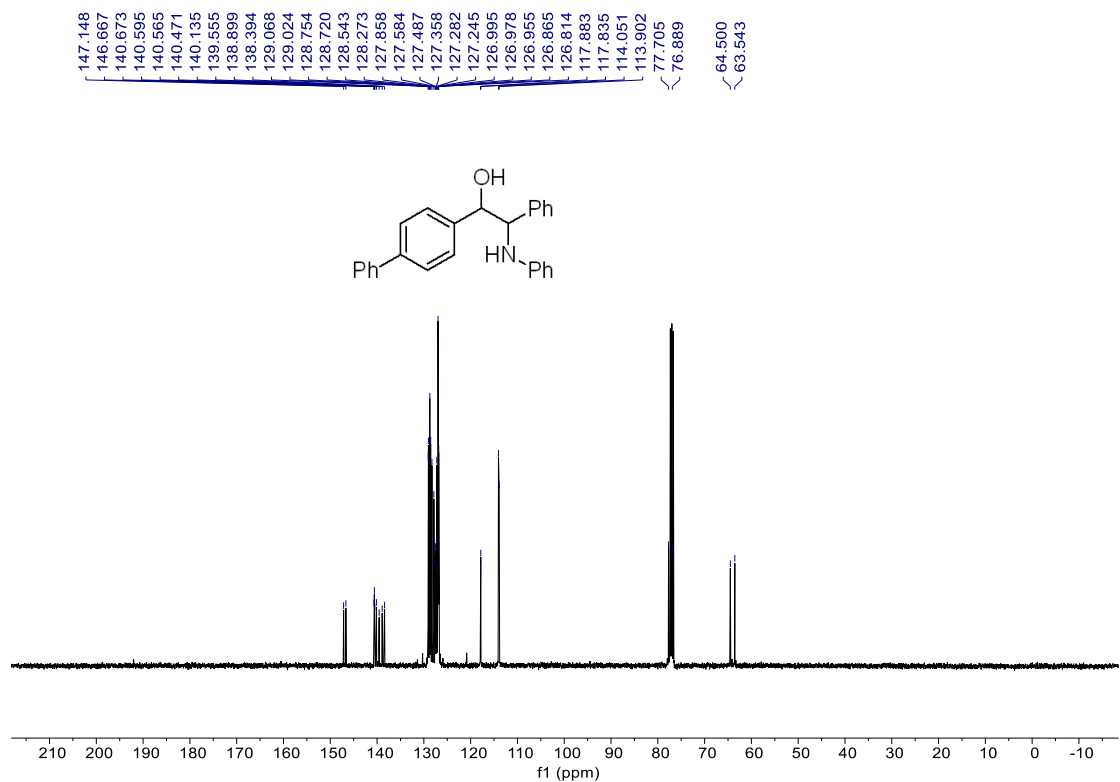



<sup>1</sup>H NMR spectrum of compound **7g** (400 MHz) in CDCl<sub>3</sub>

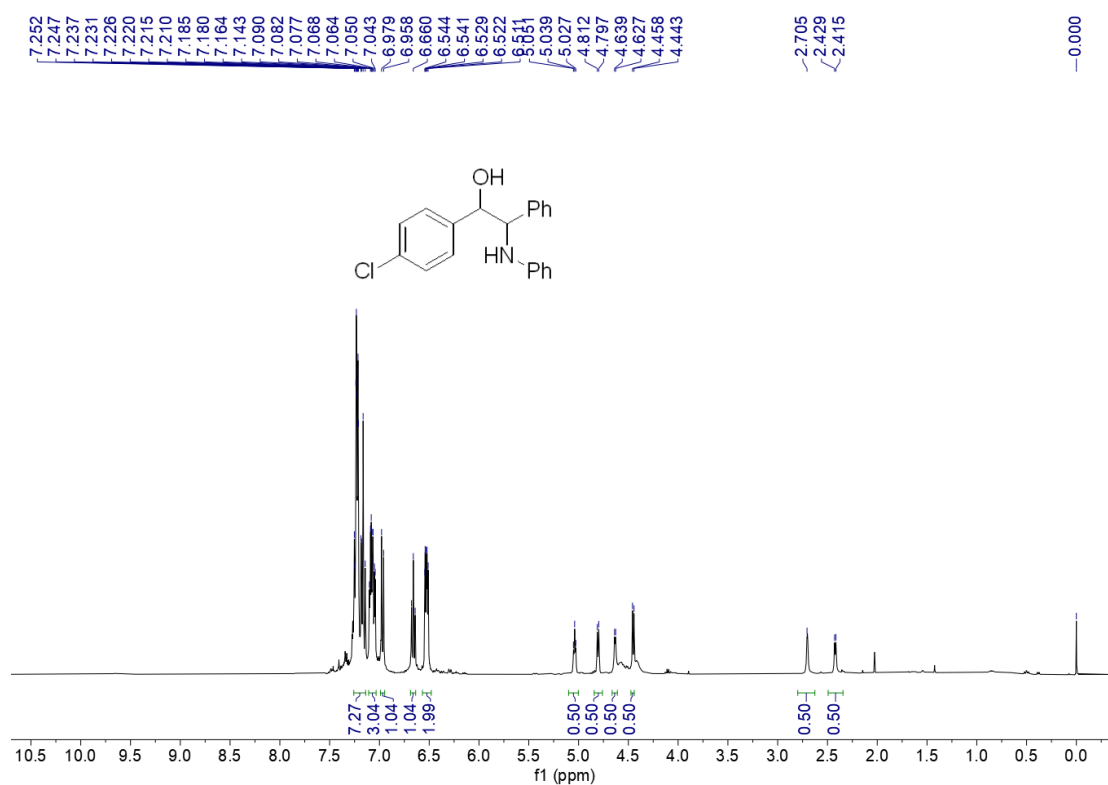

<sup>13</sup>C NMR spectrum of compound **7g** (100 MHz) in CDCl<sub>3</sub>

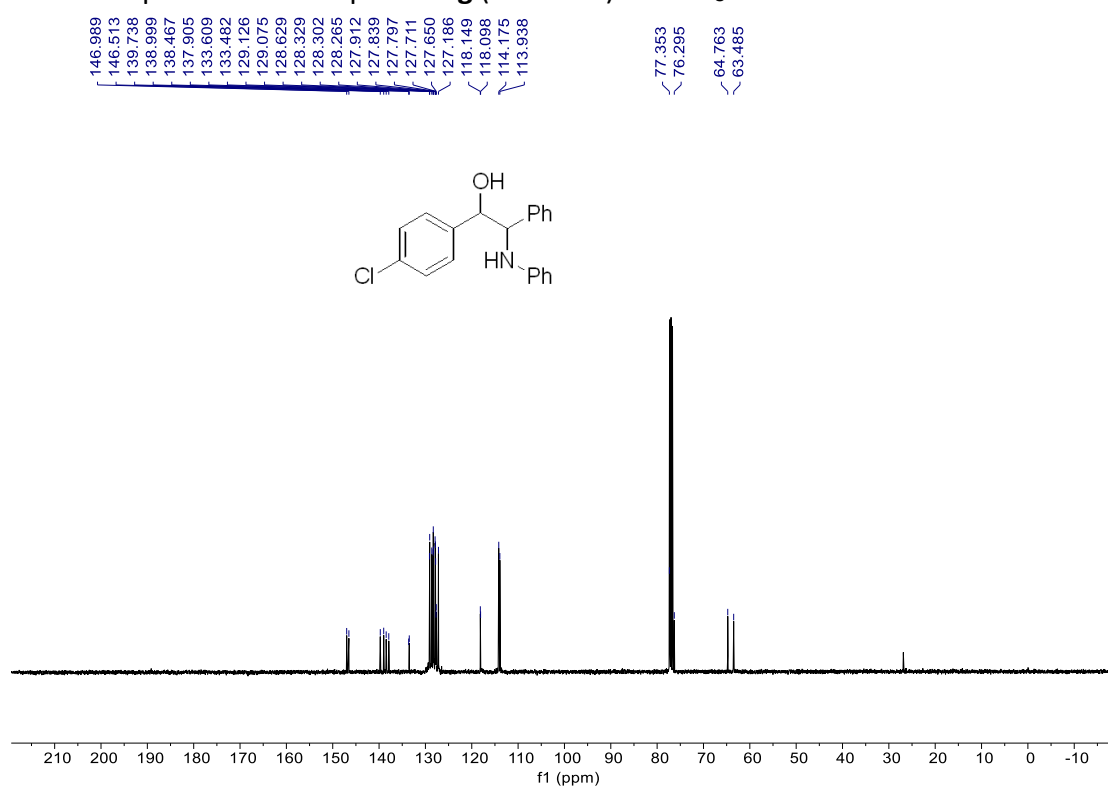



$^1\text{H}$  NMR spectrum of compound **7h** (400 MHz) in  $\text{CDCl}_3$

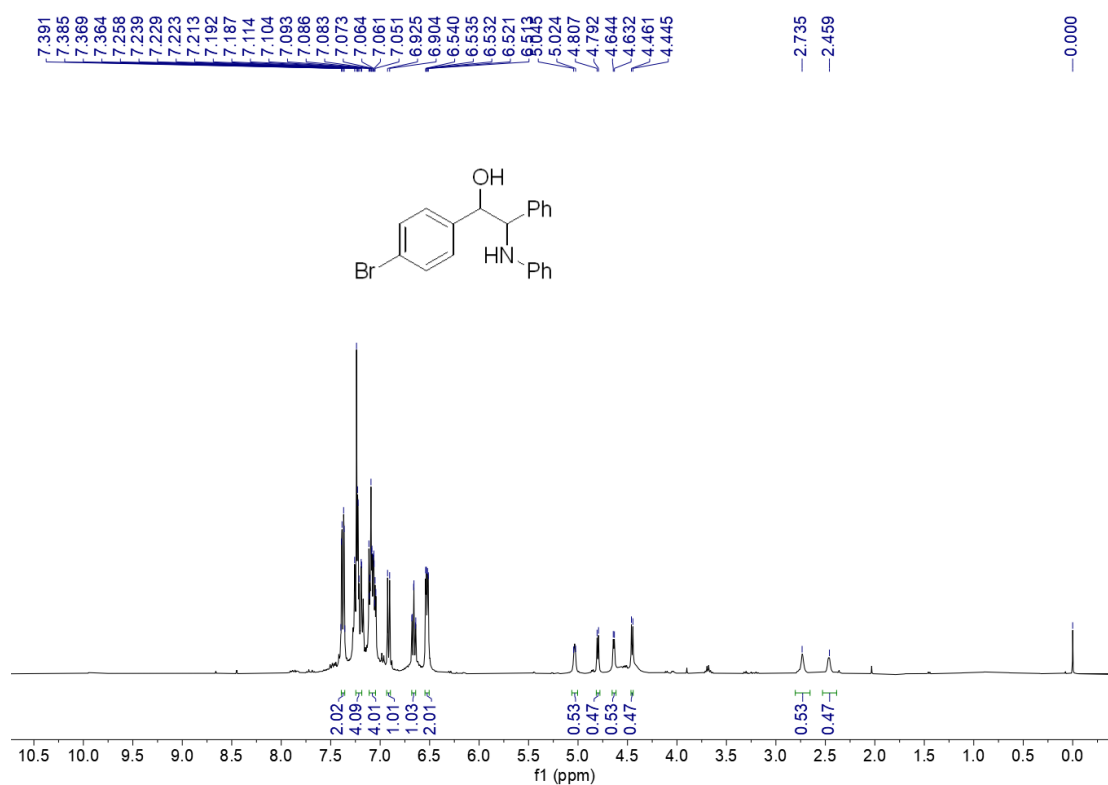

$^{13}\text{C}$  NMR spectrum of compound **7h** (100 MHz) in  $\text{CDCl}_3$

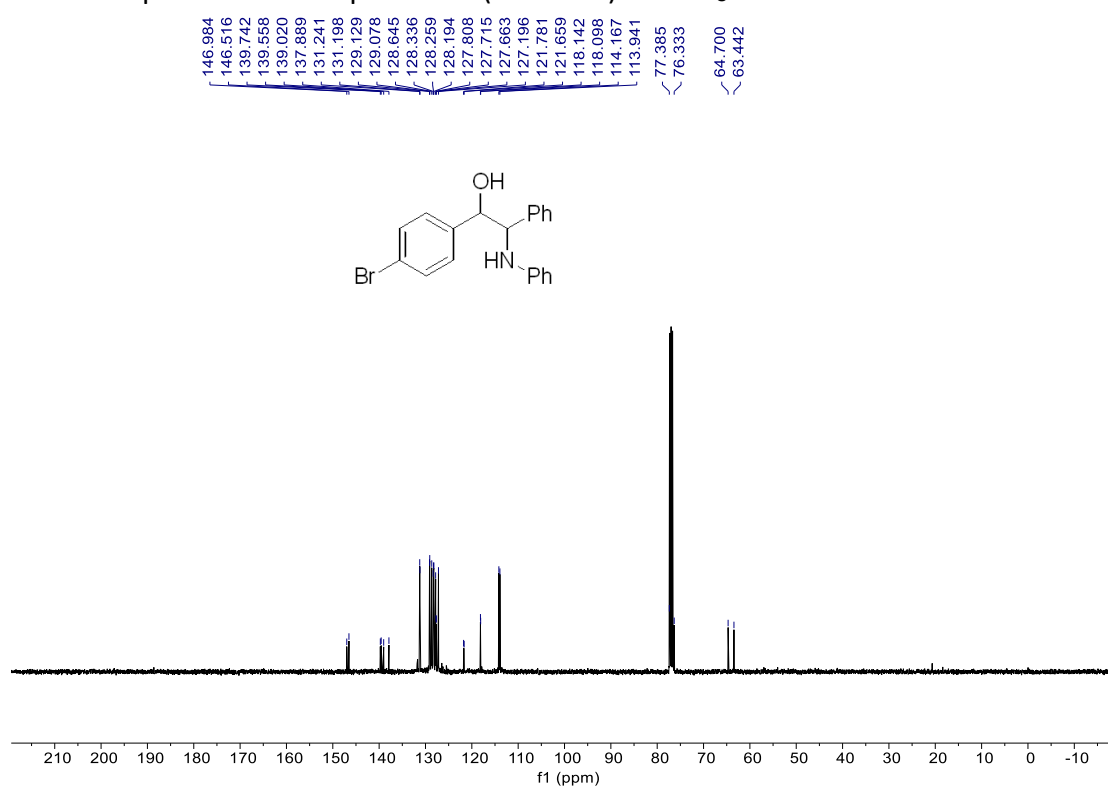



$^1\text{H}$  NMR spectrum of compound **7i** (400 MHz) in  $\text{CDCl}_3$

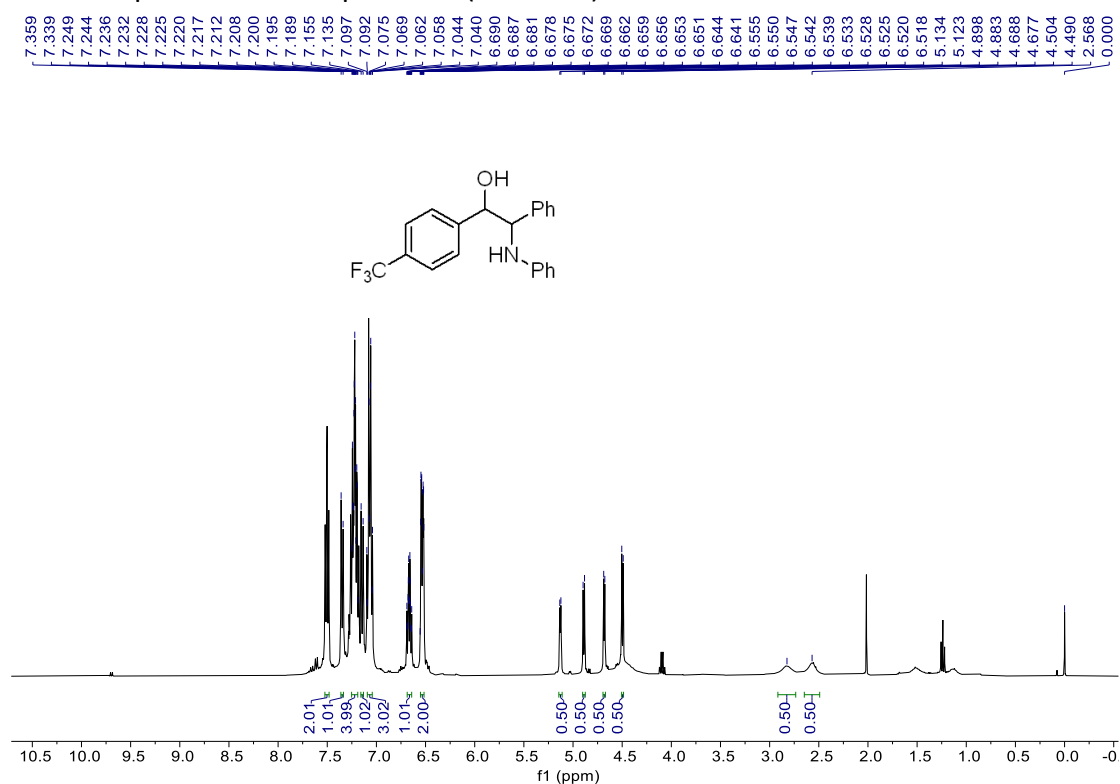

$^{13}\text{C}$  NMR spectrum of compound **7i** (100 MHz) in  $\text{CDCl}_3$

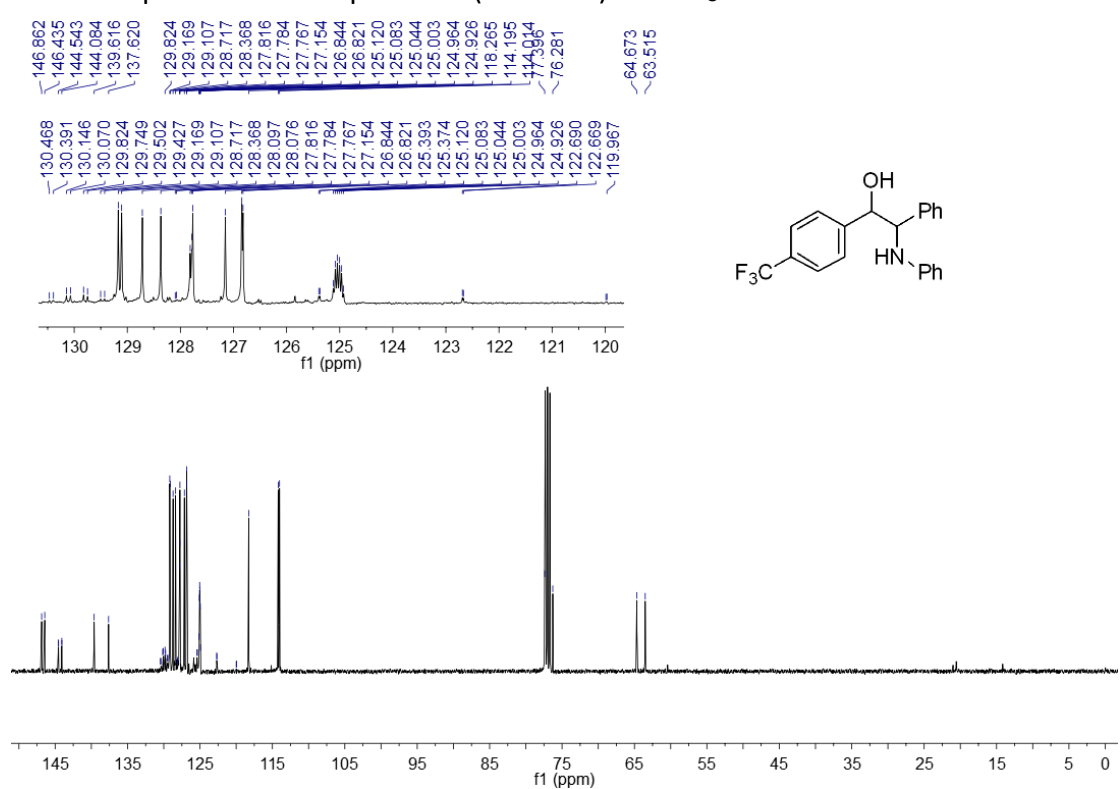



$^{19}\text{F}$  NMR spectrum of compound **7i** (376 MHz) in  $\text{CDCl}_3$

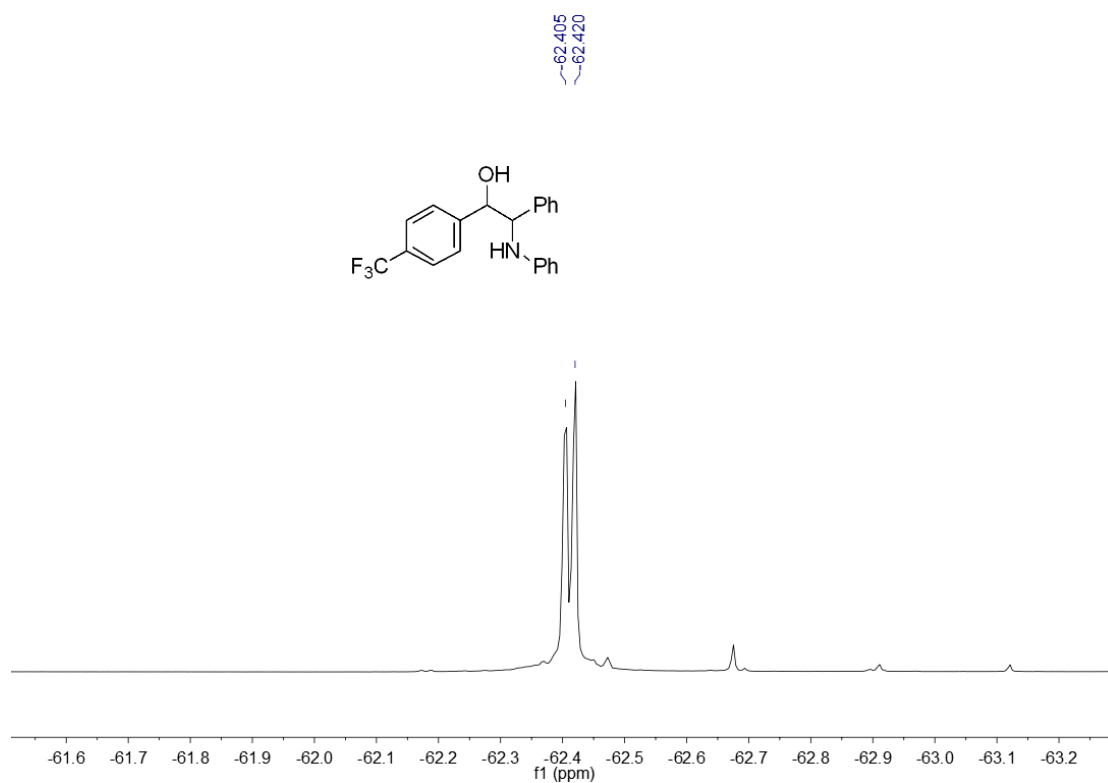

$^1\text{H}$  NMR spectrum of compound **7j** (400 MHz) in  $\text{CDCl}_3$

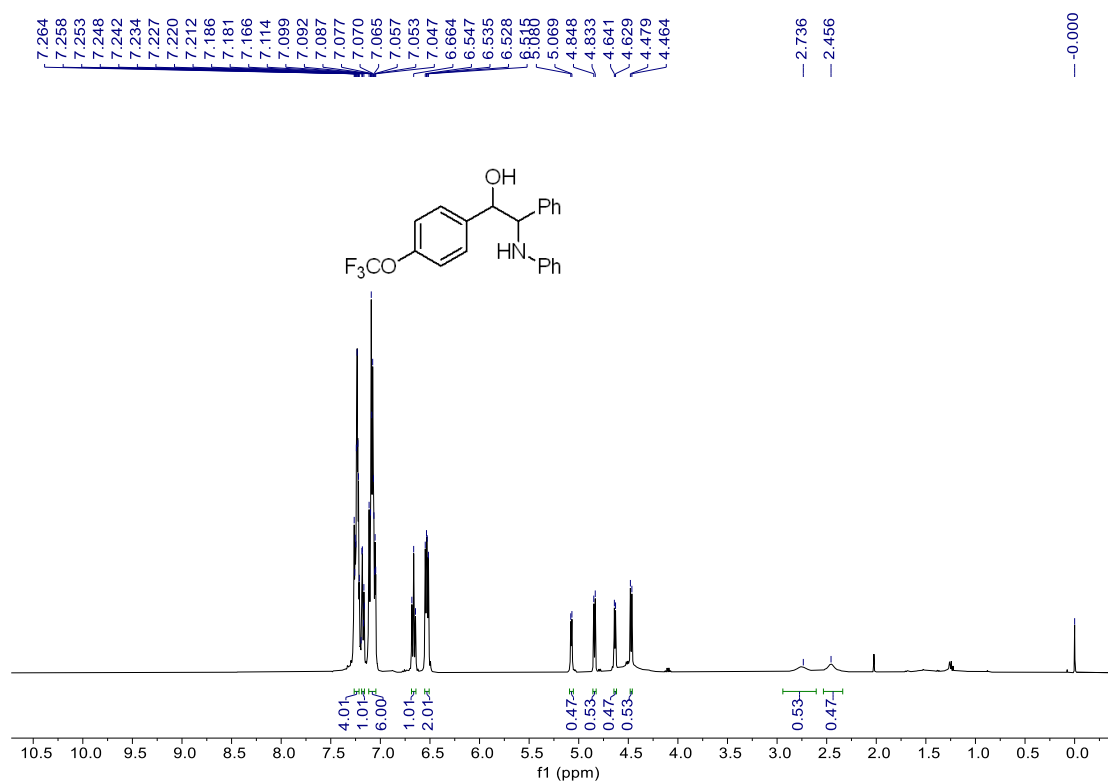



<sup>13</sup>C NMR spectrum of compound **7j** (100 MHz) in CDCl<sub>3</sub>

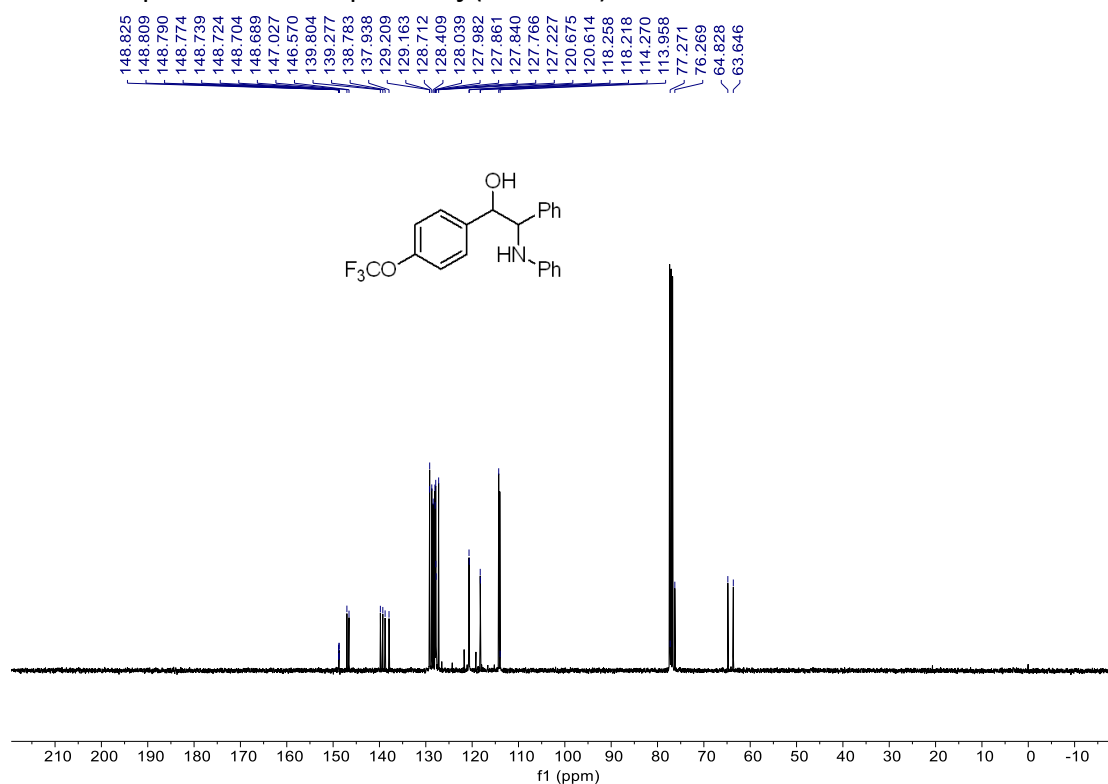

<sup>19</sup>F NMR spectrum of compound **7j** (376 MHz) in CDCl<sub>3</sub>

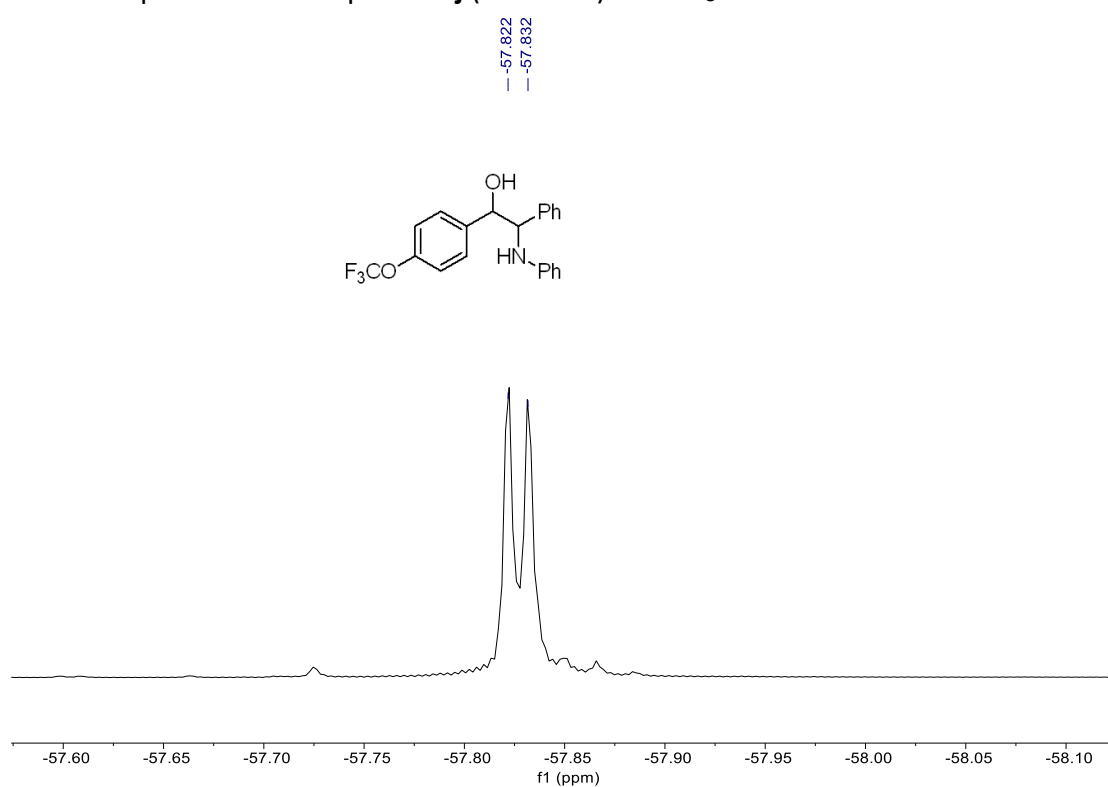



Chemical structure: Cc1ccc(cc1)C(O)(c2ccccc2)Nc3ccccc3

<sup>1</sup>H NMR spectrum (ppm):

- 7.625, 7.609, 7.231, 7.227, 7.217, 7.214, 7.192, 7.181, 7.173, 7.088, 7.082, 7.075, 7.068, 7.064, 7.057, 7.054, 7.049, 7.046, 7.041, 7.036, 7.028, 7.022, 6.941, 6.922, 6.654, 6.635, 6.617, 6.524, 6.521, 6.518, 6.502, 6.499, 6.496, 5.289, 5.278, 5.267, 5.062, 5.046, 4.626, 4.615, 4.505, 4.490, 2.434, 2.426, 2.258, 2.203, 2.190, 1.960, -0.000

Integration values (from left to right): 0.47, 6.04, 4.02, 0.53, 0.99, 2.01, 0.48, 0.52, 0.48, 0.52, 0.52, 1.40, 0.48, 1.59.

Cc1ccccc1C(O)C(Nc2ccccc2)c3ccccc3

<sup>13</sup>C NMR (CDCl<sub>3</sub>) peaks (ppm): 147.335, 146.713, 140.181, 139.006, 138.310, 138.144, 135.434, 135.072, 130.362, 130.216, 129.060, 128.991, 128.451, 128.108, 128.078, 127.711, 127.671, 127.550, 127.429, 127.128, 126.306, 126.266, 126.137, 125.836, 117.751, 117.732, 114.087, 113.844, 74.050, 73.516, 63.781, 62.123, 19.164, 18.951.



$^1\text{H}$  NMR spectrum of compound **7l** (400 MHz) in  $\text{CDCl}_3$

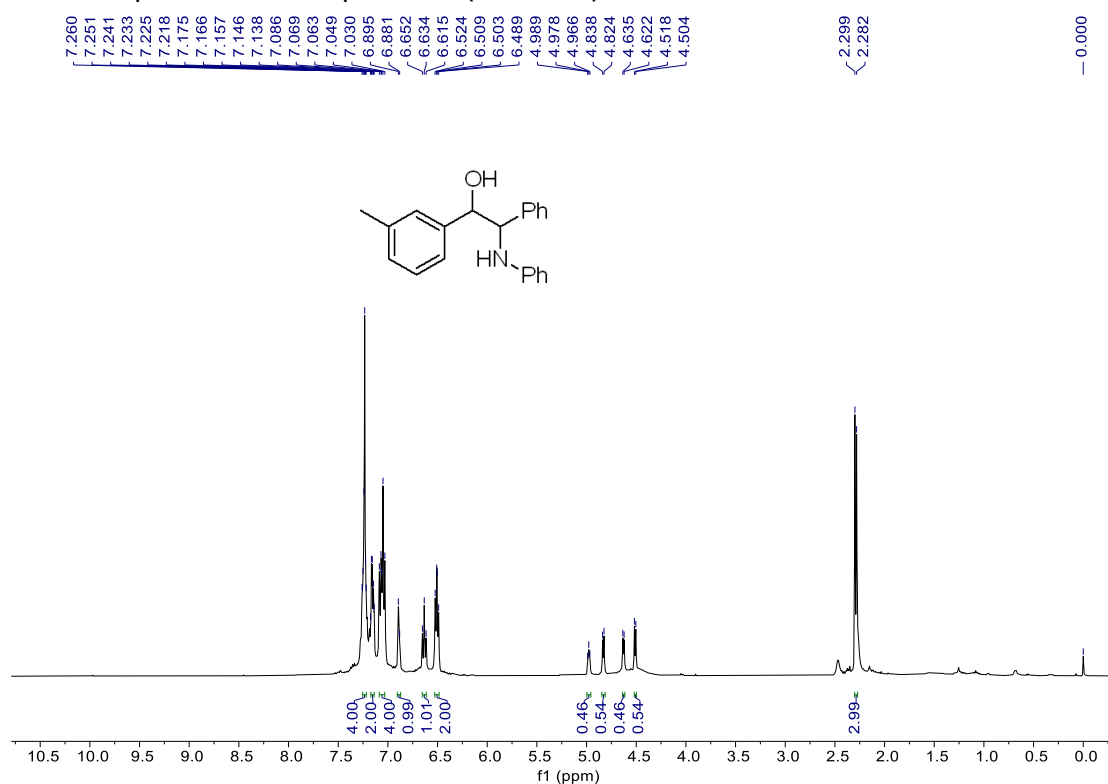

$^{13}\text{C}$  NMR spectrum of compound **7l** (100 MHz) in  $\text{CDCl}_3$

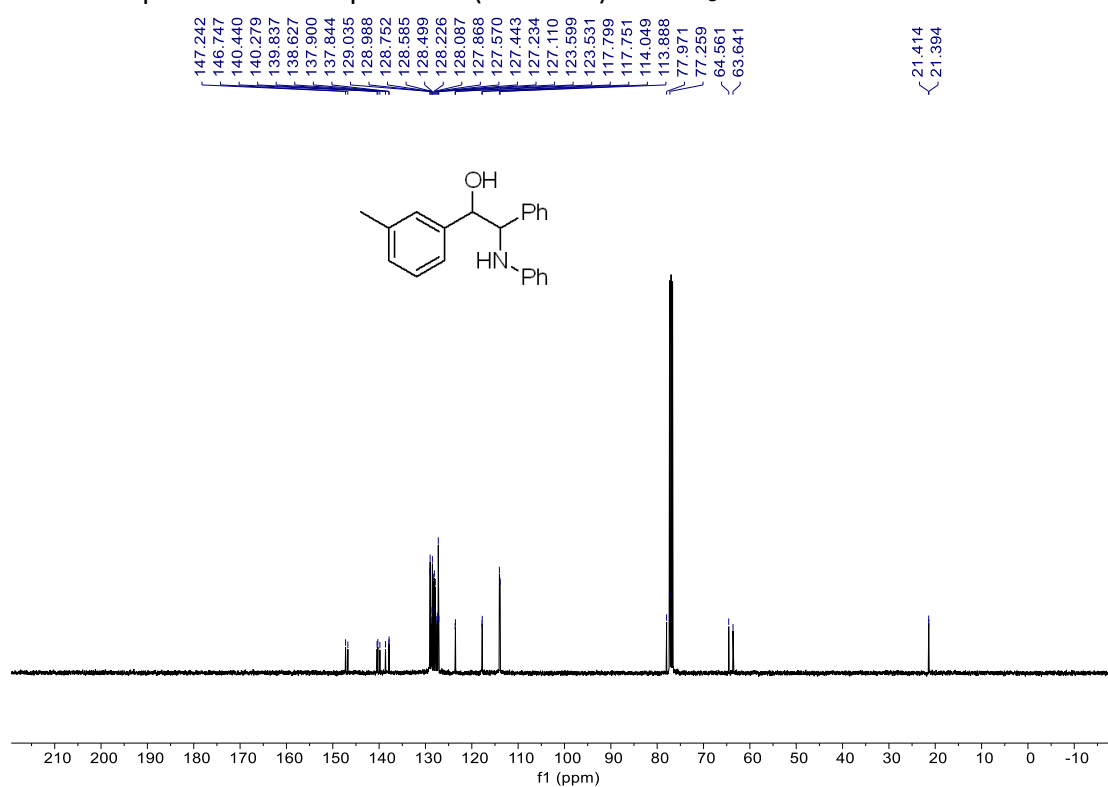



$^1\text{H}$  NMR spectrum of compound **7m** (400 MHz) in  $\text{CDCl}_3$

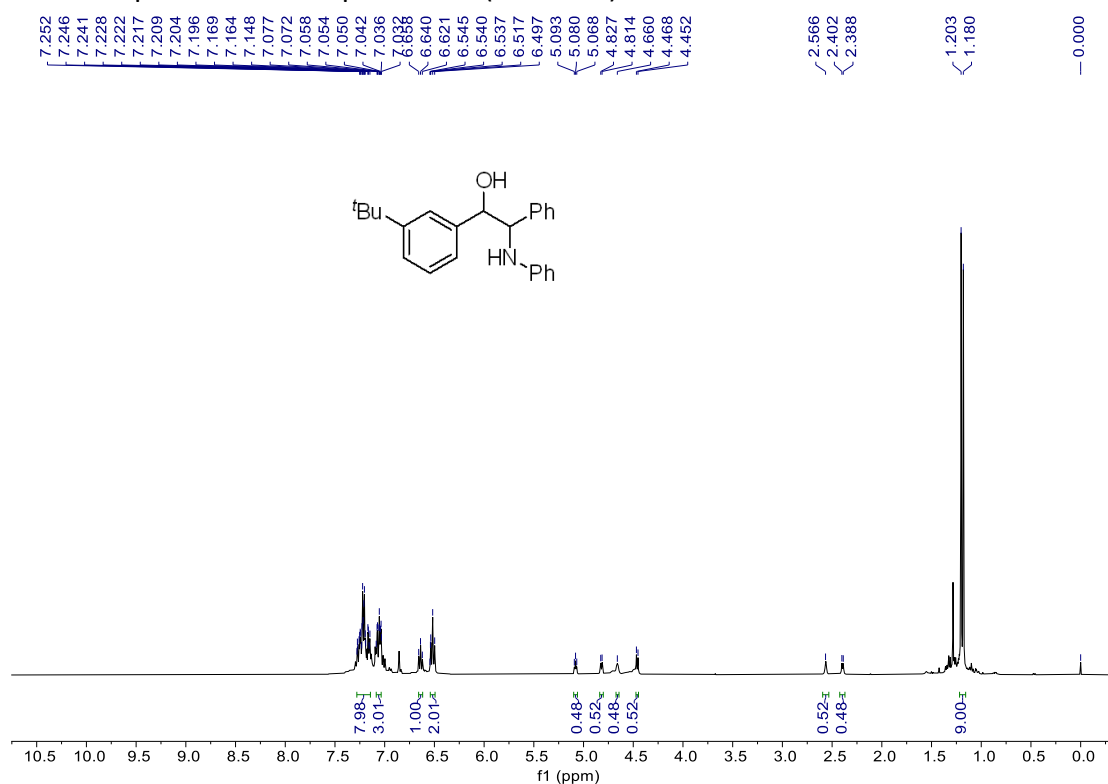

$^{13}\text{C}$  NMR spectrum of compound **7m** (100 MHz) in  $\text{CDCl}_3$

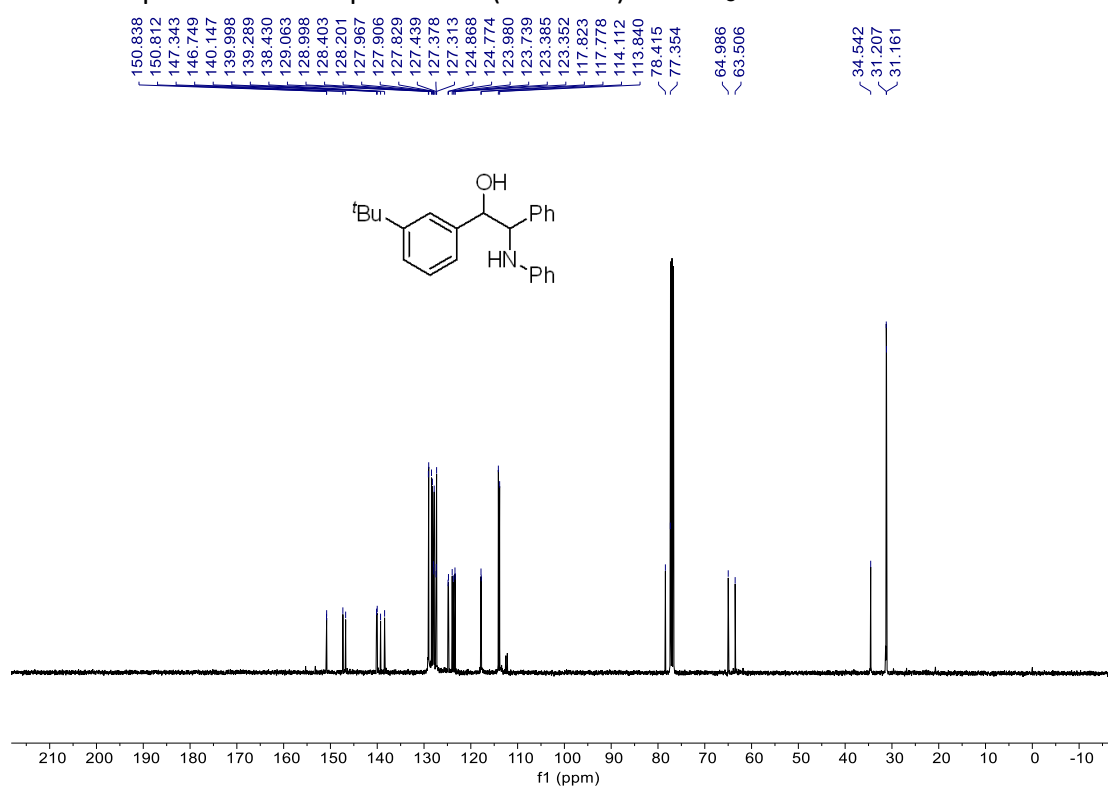



$^1\text{H}$  NMR spectrum of compound **7n** (400 MHz) in  $\text{CDCl}_3$

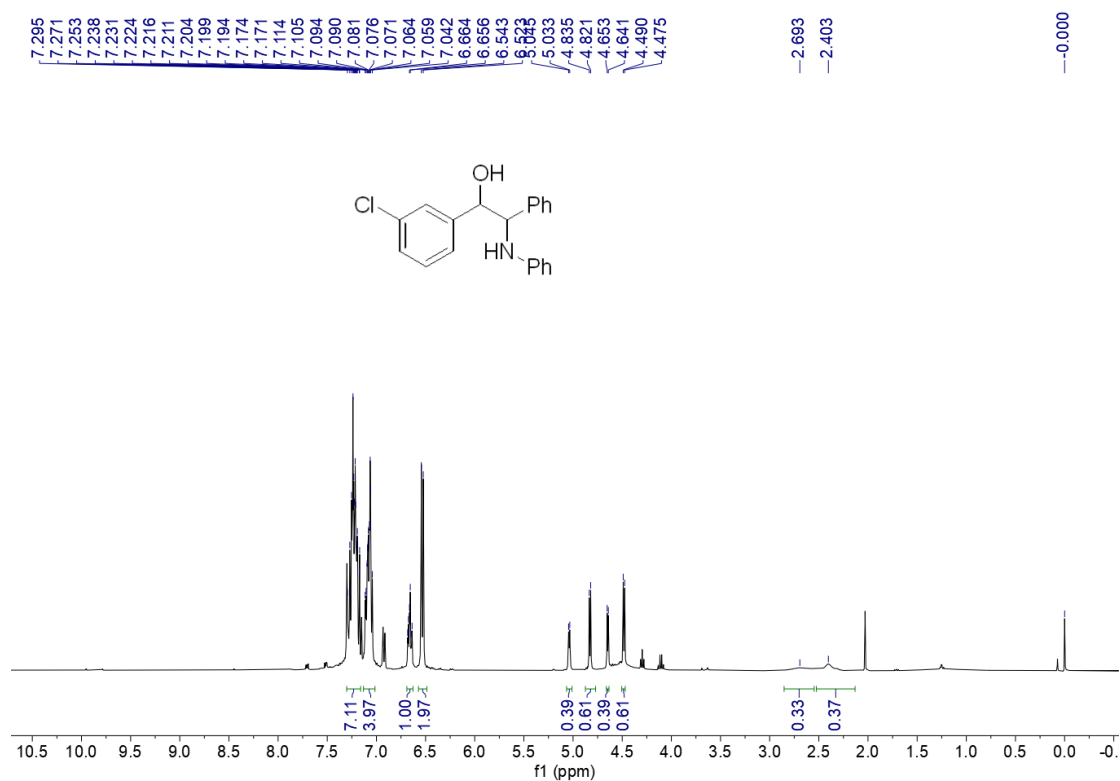

$^{13}\text{C}$  NMR spectrum of compound **7n** (100 MHz) in  $\text{CDCl}_3$

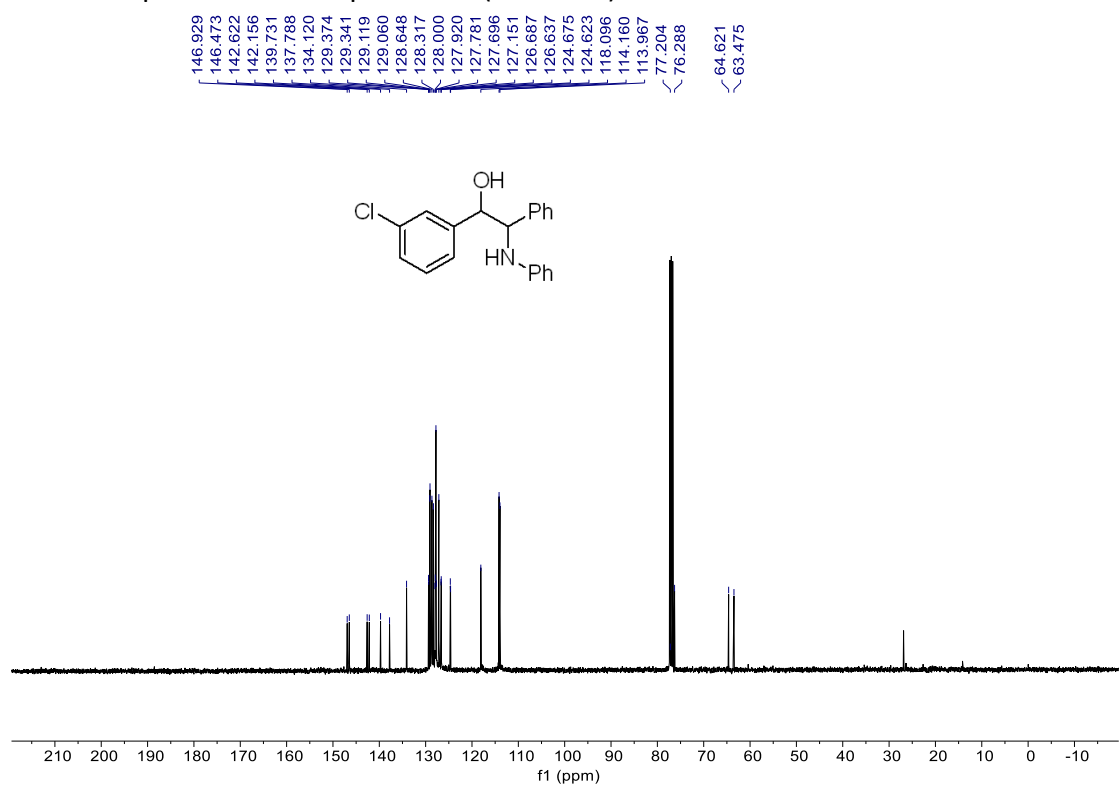



$^1\text{H}$  NMR spectrum of compound **7o** (400 MHz) in  $\text{CDCl}_3$

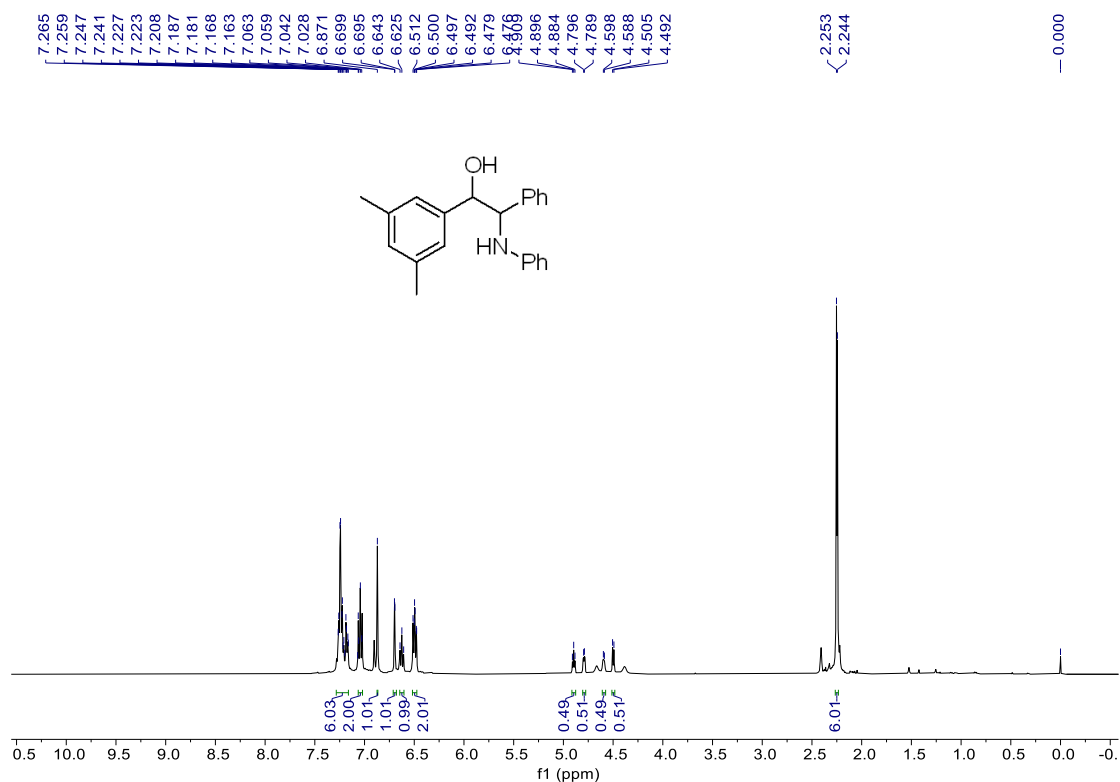

$^{13}\text{C}$  NMR spectrum of compound **7o** (100 MHz) in  $\text{CDCl}_3$

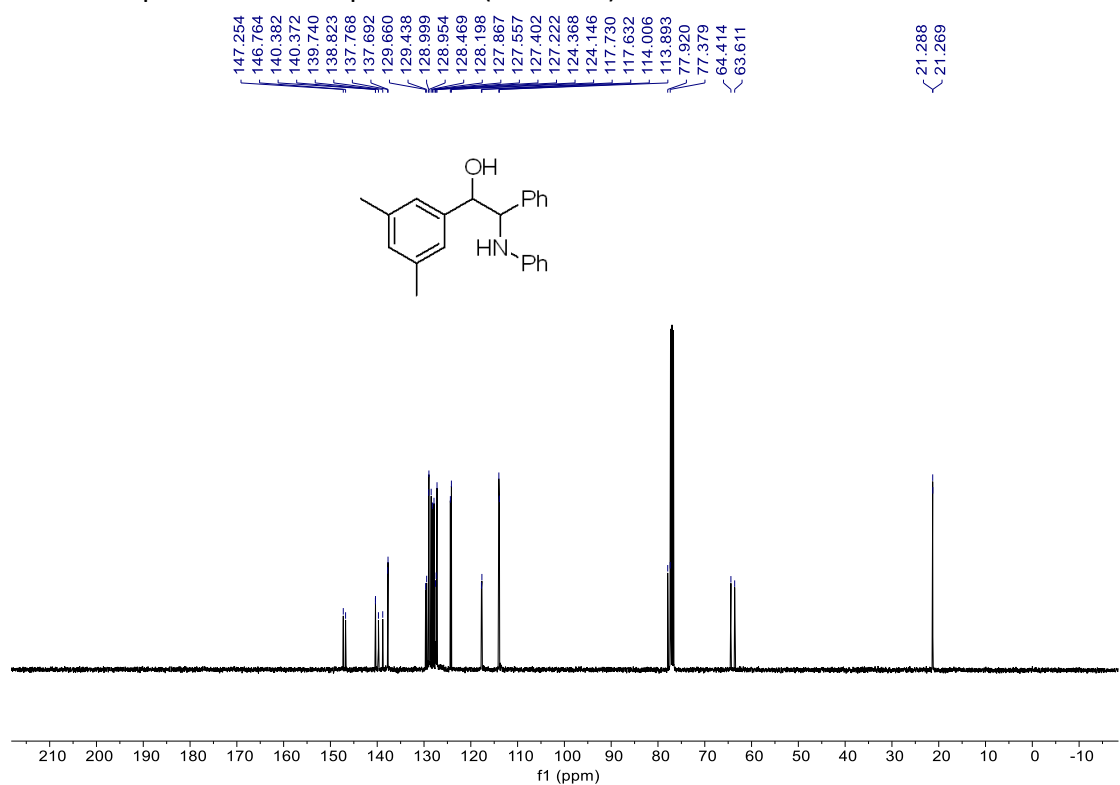



$^1\text{H}$  NMR spectrum of compound **7p** (400 MHz) in  $\text{CDCl}_3$

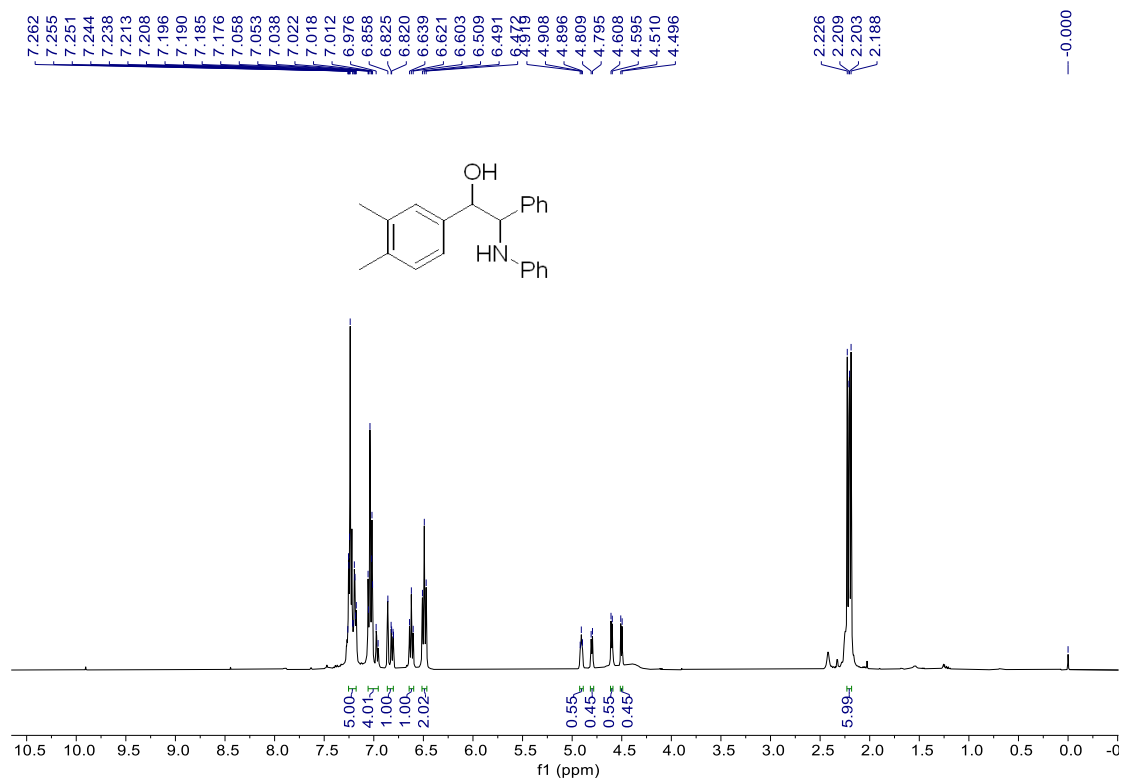

$^{13}\text{C}$  NMR spectrum of compound **7p** (100 MHz) in  $\text{CDCl}_3$

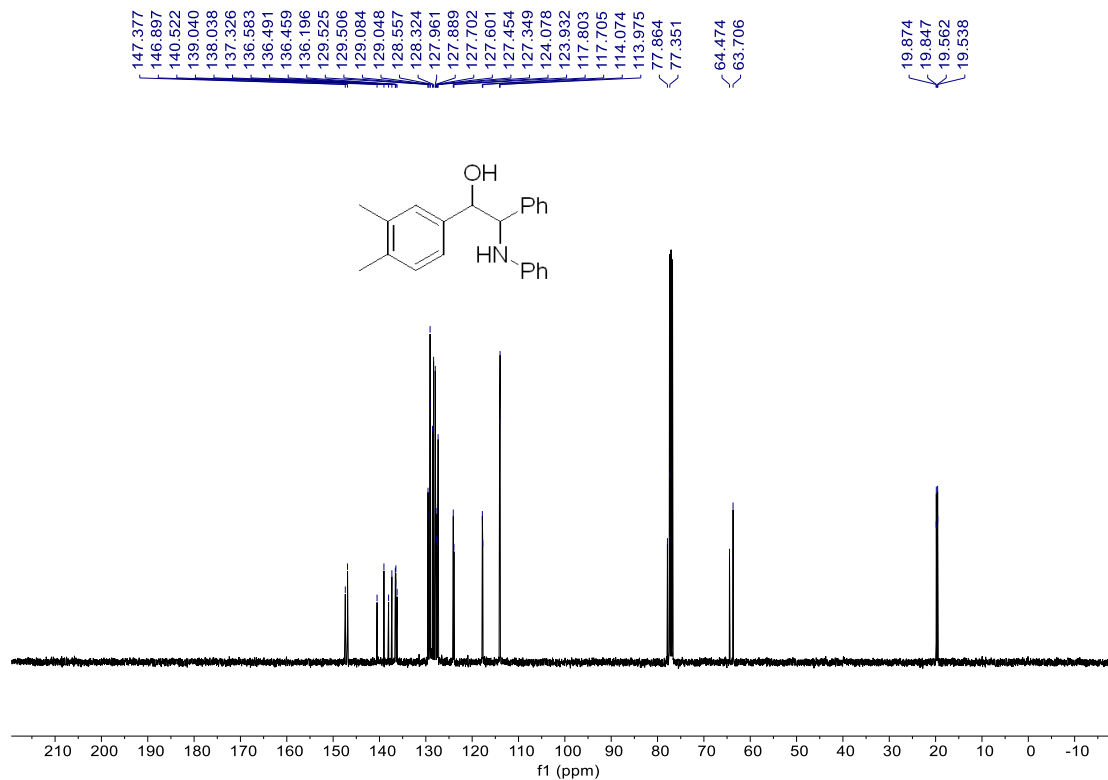



<sup>1</sup>H NMR spectrum of compound **7q** (400 MHz) in CDCl<sub>3</sub>

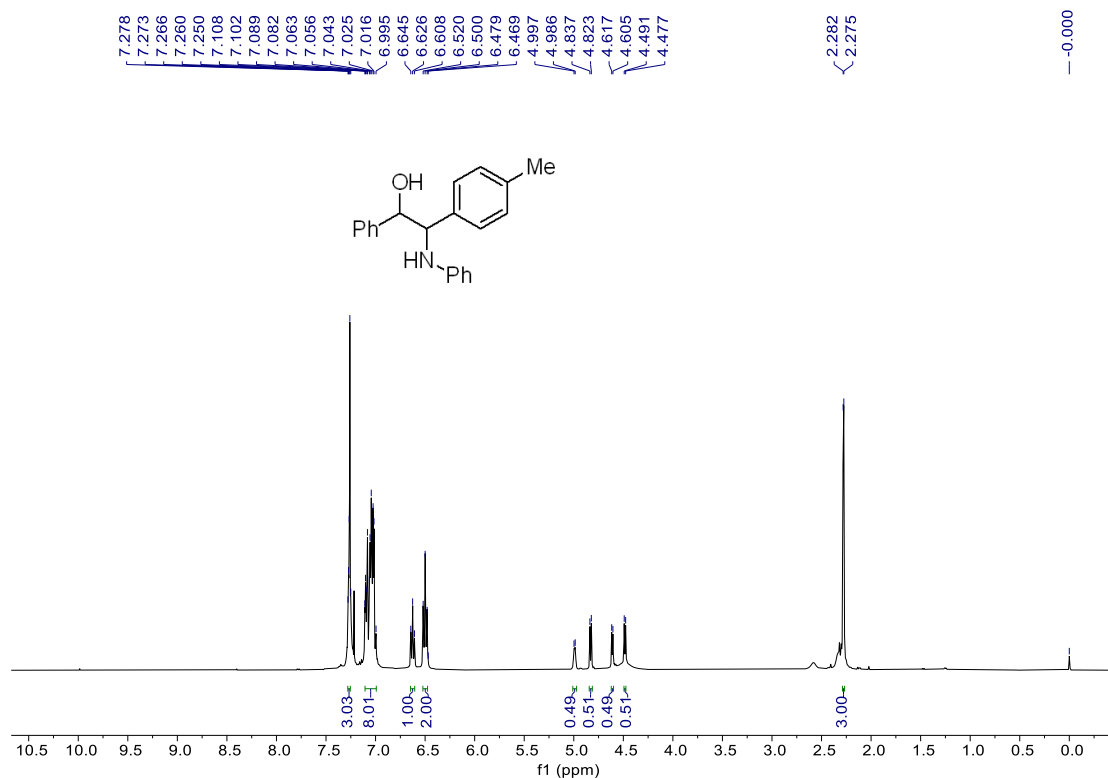

<sup>13</sup>C NMR spectrum of compound **7q** (100 MHz) in CDCl<sub>3</sub>

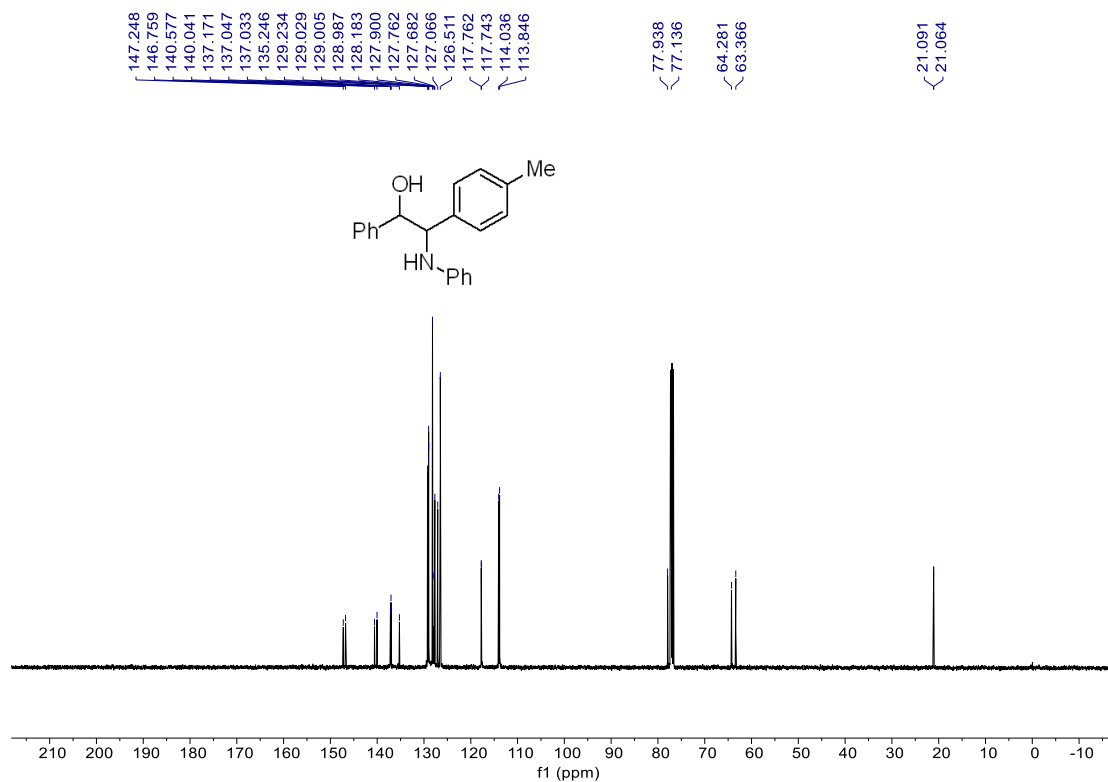



<sup>1</sup>H NMR spectrum of compound **7r** (400 MHz) in CDCl<sub>3</sub>

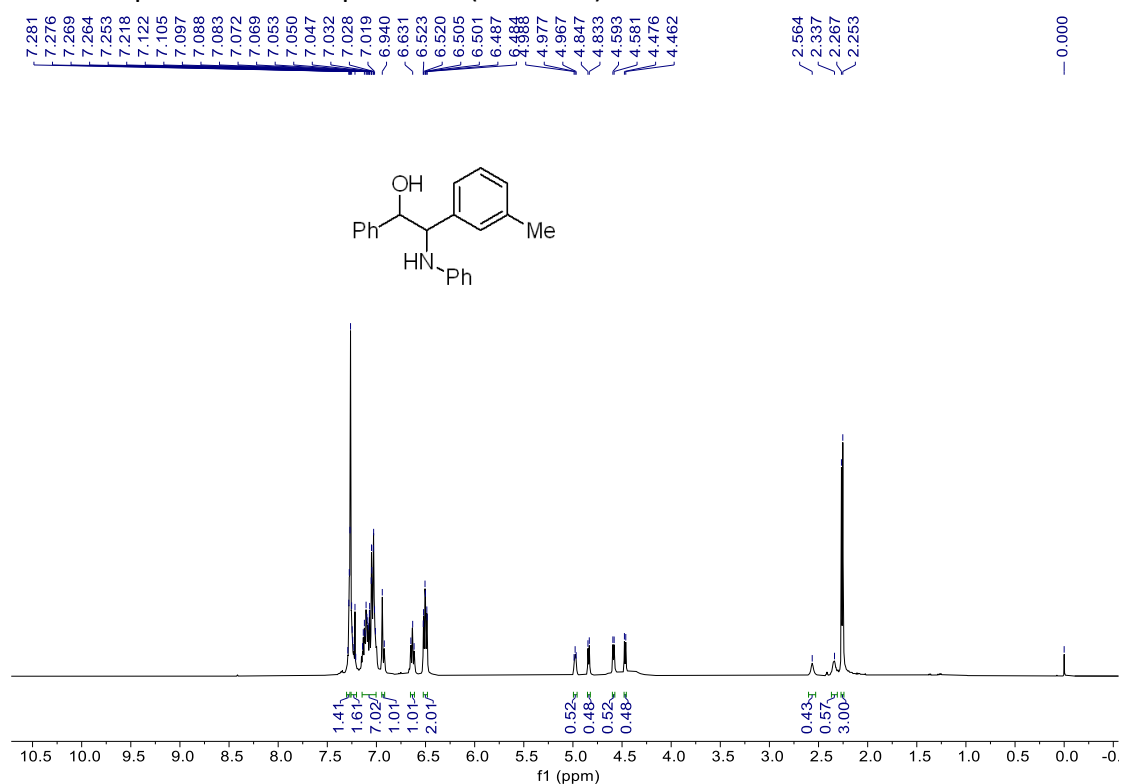

<sup>13</sup>C NMR spectrum of compound **7r** (100 MHz) in CDCl<sub>3</sub>

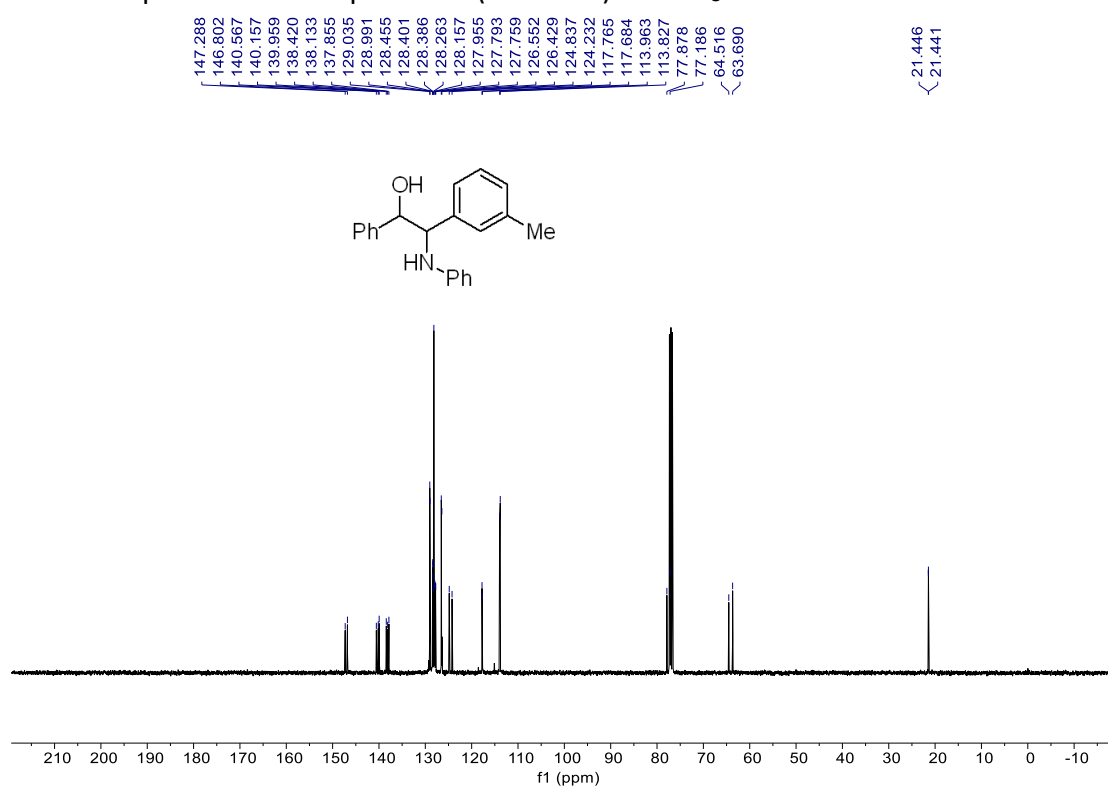



[illegible]

Chemical structure of the compound is shown above the spectrum:

CC1=CC=C(C=C1)C(NC(C2=CC=CC=C2)C(O)C3=CC=CC=C3)=CC=C1

The spectrum displays chemical shifts (f1) in ppm on the x-axis, ranging from -10 to 210. Key peaks are labeled with their corresponding chemical shift values:

- 147.234, 146.735, 140.503, 139.913, 138.390, 136.662, 136.549, 135.757, 130.646, 130.294, 129.098, 129.061, 128.136, 128.079, 127.715, 127.306, 126.906, 126.775, 126.443, 126.216, 126.096, 125.531, 117.813, 115.097, 113.800, 113.628, 76.644, 76.530, 60.406, 59.012, 19.275, 19.200.
